# Supplementary material for: Causal links between gut microbiomes, cytokines and risk of different subtypes of epilepsy: a Mendelian randomization study
Source: Frontiers journal article supplement (doi:10.3389/fnins.2024.1397430), 2024-05-24
Supplement: Data_Sheet_1.ZIP [file Data_Sheet_1.ZIP]

## Sheet: Supplementary Table S1
Supplementary Table S1 STROBE-MR checklist of recommended items to address in reports of Mendelian randomization studies
Item No.	Section	Checklist item	Page No.
1	TITLE and ABSTRACT	Indicate Mendelian randomization (MR) as the study’s design in the title and/or the abstract if that is a main purpose of the study	1,2
	INTRODUCTION
2	Background	Explain the scientific background and rationale for the reported study. What is the exposure? Is a potential causal relationship between exposure and outcome plausible? Justify why MR is a helpful method to address the study question	2
3	Objectives	State specific objectives clearly, including pre-specified causal hypotheses (if any). State that MR is a method that, under specific assumptions, intends to estimate causal effects	2-3
	METHODS
4	Study design and data sources	Present key elements of the study design early in the article. Consider including a table listing sources of data for all phases of the study. For each data source contributing to the analysis, describe the following:
	a)	Setting: Describe the study design and the underlying population, if possible. Describe the setting, locations, and relevant dates, including periods of recruitment, exposure, follow-up, and data collection, when available.	3-4
	b)	Participants: Give the eligibility criteria, and the sources and methods of selection of participants. Report the sample size, and whether any power or sample size calculations were carried out prior to the main analysis	3-4
	c)	Describe measurement, quality control and selection of genetic variants	3-4
	d)	For each exposure, outcome, and other relevant variables, describe methods of assessment and diagnostic criteria for diseases	4-5
	e)	Provide details of ethics committee approval and participant informed consent, if relevant	3
5	Assumptions	Explicitly state the three core IV assumptions for the main analysis (relevance, independence and exclusion restriction) as well assumptions for any additional or sensitivity analysis	3-4
6	Statistical methods: main analysis	Describe statistical methods and statistics used
	a)	Describe how quantitative variables were handled in the analyses (i.e., scale, units, model)	4-5
	b)	Describe how genetic variants were handled in the analyses and, if applicable, how their weights were selected	4-5
	c)	Describe the MR estimator (e.g. two-stage least squares, Wald ratio) and related statistics. Detail the included covariates and, in case of two-sample MR, whether the same covariate set was used for adjustment in the two samples	4-5
	d)	Explain how missing data were addressed	4-5
	e)	If applicable, indicate how multiple testing was addressed	5-6
7	Assessment of assumptions	Describe any methods or prior knowledge used to assess the assumptions or justify their validity	4
8	Sensitivity analyses and additional analyses	Describe any sensitivity analyses or additional analyses performed (e.g. comparison of effect estimates from different approaches, independent replication, bias analytic techniques, validation of instruments, simulations)	5
9	Software and pre-registration
	a)	Name statistical software and package(s), including version and settings used	5
	b)	State whether the study protocol and details were pre-registered (as well as when and where)	-
	RESULTS
10	Descriptive data
	a)	Report the numbers of individuals at each stage of included studies and reasons for exclusion. Consider use of a flow diagram	6
	b)	Report summary statistics for phenotypic exposure(s), outcome(s), and other relevant variables (e.g. means, SDs, proportions)	6
	c)	If the data sources include meta-analyses of previous studies, provide the assessments of heterogeneity across these studies	-
	d)	For two-sample MR:	6-7
		i. Provide justification of the similarity of the genetic variant-exposure associations between the exposure and outcome samples
		ii. Provide information on the number of individuals who overlap between the exposure and outcome studies
11	Main results
	a)	Report the associations between genetic variant and exposure, and between genetic variant and outcome, preferably on an interpretable scale	6-7
	b)	Report MR estimates of the relationship between exposure and outcome, and the measures of uncertainty from the MR analysis, on an interpretable scale, such as odds ratio or relative risk per SD difference	6-7
	c)	If relevant, consider translating estimates of relative risk into absolute risk for a meaningful time period	-
	d)	Consider plots to visualize results (e.g. forest plot, scatterplot of associations between genetic variants and outcome versus between genetic variants and exposure)	6-7
12	Assessment of assumptions
	a)	Report the assessment of the validity of the assumptions	7
	b)	Report any additional statistics (e.g., assessments of heterogeneity across genetic variants, such as I2, Q statistic or E-value)	7
13	Sensitivity analyses and additional analyses
	a)	Report any sensitivity analyses to assess the robustness of the main results to violations of the assumptions	7
	b)	Report results from other sensitivity analyses or additional analyses	7
	c)	Report any assessment of direction of causal relationship (e.g., bidirectional MR)	7
	d)	When relevant, report and compare with estimates from non-MR analyses	-
	e)	Consider additional plots to visualize results (e.g., leave-one-out analyses)	6-7
	DISCUSSION
14	Key results	Summarize key results with reference to study objectives	8
15	Limitations	Discuss limitations of the study, taking into account the validity of the IV assumptions, other sources of potential bias, and imprecision. Discuss both direction and magnitude of any potential bias and any efforts to address them	8-9
16	Interpretation
	a)	Meaning: Give a cautious overall interpretation of results in the context of their limitations and in comparison with other studies	8-9
	b)	Mechanism: Discuss underlying biological mechanisms that could drive a potential causal relationship between the investigated exposure and the outcome, and whether the gene-environment equivalence assumption is reasonable. Use causal language carefully, clarifying that IV estimates may provide causal effects only under certain assumptions	8-9
	c)	Clinical relevance: Discuss whether the results have clinical or public policy relevance, and to what extent they inform effect sizes of possible interventions	8-9
17	Generalizability	Discuss the generalizability of the study results (a) to other populations, (b) across other exposure periods/timings, and (c) across other levels of exposure	9
	OTHER INFORMATION
18	Funding	Describe sources of funding and the role of funders in the present study and, if applicable, sources of funding for the databases and original study or studies on which the present study is based	10
19	Data and data sharing	Provide the data used to perform all analyses or report where and how the data can be accessed, and reference these sources in the article. Provide the statistical code needed to reproduce the results in the article, or report whether the code is publicly accessible and if so, where	10
20	Conflicts of Interest	All authors should declare all potential conflicts of interest	10

## Sheet: Supplementary Table S2
Supplementary Table S2 Included instrumental variables for significant taxa
outcome	id.exposure	ID	SNP	effect_allele.exposure	other_allele.exposure	effect_allele.outcome	other_allele.outcome	beta.exposure	beta.outcome	eaf.exposure	eaf.outcome	remove	palindromic	ambiguous	se.outcome	pval.outcome	mr_keep.outcome	chr.exposure	pos.exposure	se.exposure	pval.exposure	F
childhood absence epilepsy || id:ieu-b-13	ebi-a-GCST90016908	class Actinobacteria id.419	rs11655079	T	C	T	C	-0.0560674	0.000113119	NA	0.282834	FALSE	FALSE	FALSE	0.00175106	0.95	TRUE	17	75348675	0.0124286	5.92516e-06	20.3506
childhood absence epilepsy || id:ieu-b-13	ebi-a-GCST90016908	class Actinobacteria id.419	rs11745923	G	T	G	T	0.0563759	-0.000424368	NA	0.391584	FALSE	FALSE	FALSE	0.00157723	0.79	TRUE	5	475408	0.0115529	1.58132e-06	23.8125
childhood absence epilepsy || id:ieu-b-13	ebi-a-GCST90016908	class Actinobacteria id.419	rs12049045	A	G	A	G	0.0510452	-0.00211015	NA	0.375632	FALSE	FALSE	FALSE	0.00159565	0.19	TRUE	1	114665485	0.0114325	8.62621e-06	19.9355
childhood absence epilepsy || id:ieu-b-13	ebi-a-GCST90016908	class Actinobacteria id.419	rs134366	A	G	A	G	-0.111877	-6.12278e-05	NA	0.943692	FALSE	FALSE	FALSE	0.00333034	0.99	TRUE	22	35567355	0.023501	1.50428e-06	22.6626
childhood absence epilepsy || id:ieu-b-13	ebi-a-GCST90016908	class Actinobacteria id.419	rs1376754	G	A	G	A	0.0509242	0.0013598	NA	0.44246	FALSE	FALSE	FALSE	0.00156467	0.38	TRUE	2	161611969	0.0112503	6.71382e-06	20.489
childhood absence epilepsy || id:ieu-b-13	ebi-a-GCST90016908	class Actinobacteria id.419	rs4945008	G	A	G	A	-0.0540741	-0.00484231	NA	0.745411	FALSE	FALSE	FALSE	0.00175263	0.00569994	TRUE	11	71221248	0.0121393	5.39237e-06	19.8423
childhood absence epilepsy || id:ieu-b-13	ebi-a-GCST90016908	class Actinobacteria id.419	rs857444	C	T	C	T	0.0509553	-0.000855925	NA	0.349909	FALSE	FALSE	FALSE	0.00159483	0.59	TRUE	6	14617591	0.011539	8.92237e-06	19.5003
childhood absence epilepsy || id:ieu-b-13	ebi-a-GCST90016908	class Actinobacteria id.419	rs961091	G	A	G	A	0.0501255	-0.00246287	NA	0.407339	FALSE	FALSE	FALSE	0.00156915	0.12	TRUE	7	95654718	0.011255	8.67601e-06	19.8347
childhood absence epilepsy || id:ieu-b-13	ebi-a-GCST90016909	class Alphaproteobacteria id.2379	rs55876211	C	T	C	T	-0.080811	0.00160113	NA	0.18636	FALSE	FALSE	FALSE	0.00196547	0.42	TRUE	3	84471266	0.0184159	7.53633e-06	19.2555
childhood absence epilepsy || id:ieu-b-13	ebi-a-GCST90016909	class Alphaproteobacteria id.2379	rs76784716	A	G	A	G	0.133271	-1.42121e-05	NA	0.071977	FALSE	FALSE	FALSE	0.00297312	1	TRUE	2	169033340	0.0267738	5.09143e-07	24.7771
childhood absence epilepsy || id:ieu-b-13	ebi-a-GCST90016909	class Alphaproteobacteria id.2379	rs7960664	A	G	A	G	-0.0969489	-0.000509569	NA	0.86157	FALSE	FALSE	FALSE	0.00221471	0.82	TRUE	12	89471235	0.0215149	8.84301e-06	20.3052
childhood absence epilepsy || id:ieu-b-13	ebi-a-GCST90016909	class Alphaproteobacteria id.2379	rs9813022	A	G	A	G	-0.0751277	-0.000355958	NA	0.312305	FALSE	FALSE	FALSE	0.00165944	0.83	TRUE	3	13726736	0.0153867	1.05334e-06	23.8402
childhood absence epilepsy || id:ieu-b-13	ebi-a-GCST90016910	class Bacilli id.1673	rs11110282	A	G	A	G	-0.101189	0.00265454	NA	0.0619158	FALSE	FALSE	FALSE	0.00317857	0.4	TRUE	12	100585559	0.0217379	4.85445e-06	21.6686
childhood absence epilepsy || id:ieu-b-13	ebi-a-GCST90016910	class Bacilli id.1673	rs11730038	G	A	G	A	-0.0630747	-0.00419282	NA	0.227886	FALSE	FALSE	FALSE	0.00182414	0.0219999	TRUE	4	98049499	0.0128717	1.96024e-06	24.0126
childhood absence epilepsy || id:ieu-b-13	ebi-a-GCST90016910	class Bacilli id.1673	rs13068444	A	G	A	G	0.0601035	-0.00319077	NA	0.188116	FALSE	FALSE	FALSE	0.00197939	0.11	TRUE	3	64398863	0.0136407	9.53038e-06	19.4145
childhood absence epilepsy || id:ieu-b-13	ebi-a-GCST90016910	class Bacilli id.1673	rs1595463	C	A	C	A	0.0476864	-0.000899684	NA	0.474988	FALSE	FALSE	FALSE	0.00157614	0.57	TRUE	2	231723657	0.0108547	7.97389e-06	19.2998
childhood absence epilepsy || id:ieu-b-13	ebi-a-GCST90016910	class Bacilli id.1673	rs28564647	T	G	T	G	-0.0613034	0.000316162	NA	0.197799	FALSE	FALSE	FALSE	0.00194836	0.87	TRUE	9	101101172	0.0137579	7.81196e-06	19.8548
childhood absence epilepsy || id:ieu-b-13	ebi-a-GCST90016910	class Bacilli id.1673	rs4028634	C	T	C	T	-0.0520614	0.00201989	NA	0.603691	FALSE	FALSE	FALSE	0.00158311	0.2	TRUE	17	40835649	0.0109842	2.2076e-06	22.4644
childhood absence epilepsy || id:ieu-b-13	ebi-a-GCST90016910	class Bacilli id.1673	rs57872228	C	T	C	T	-0.0714773	0.00129088	NA	0.150909	FALSE	FALSE	FALSE	0.00217826	0.55	TRUE	1	200418805	0.0146647	9.21977e-07	23.7569
childhood absence epilepsy || id:ieu-b-13	ebi-a-GCST90016910	class Bacilli id.1673	rs7666190	A	C	A	C	0.104044	-0.0011397	NA	0.941235	FALSE	FALSE	FALSE	0.00322777	0.719999	TRUE	4	151687420	0.0247934	8.46837e-06	17.6101
childhood absence epilepsy || id:ieu-b-13	ebi-a-GCST90016911	class Bacteroidia id.912	rs111845179	T	C	T	C	0.102648	-0.0015966	NA	0.0543744	FALSE	FALSE	FALSE	0.00339122	0.64	TRUE	14	59317502	0.0213843	9.23996e-07	23.0415
childhood absence epilepsy || id:ieu-b-13	ebi-a-GCST90016911	class Bacteroidia id.912	rs17343978	A	C	A	C	-0.0552057	0.00179739	NA	0.257978	FALSE	FALSE	FALSE	0.00176292	0.31	TRUE	22	27433885	0.0120278	8.3593e-06	21.0666
childhood absence epilepsy || id:ieu-b-13	ebi-a-GCST90016911	class Bacteroidia id.912	rs2032750	C	T	C	T	0.0508393	0.000179946	NA	0.535338	FALSE	FALSE	FALSE	0.00154438	0.91	TRUE	2	53831026	0.0106807	1.91509e-06	22.6569
childhood absence epilepsy || id:ieu-b-13	ebi-a-GCST90016911	class Bacteroidia id.912	rs55773148	G	A	G	A	-0.121514	0.00673667	NA	0.0516556	FALSE	FALSE	FALSE	0.00346389	0.0519996	TRUE	13	70523029	0.0236759	3.89583e-07	26.3414
childhood absence epilepsy || id:ieu-b-13	ebi-a-GCST90016911	class Bacteroidia id.912	rs62531359	T	G	T	G	0.0655728	-0.00266495	NA	0.135494	FALSE	FALSE	FALSE	0.00225239	0.24	TRUE	8	70916181	0.0149891	9.08657e-06	19.138
childhood absence epilepsy || id:ieu-b-13	ebi-a-GCST90016911	class Bacteroidia id.912	rs7631304	G	A	G	A	-0.0645771	0.000805704	NA	0.18535	FALSE	FALSE	FALSE	0.00197246	0.68	TRUE	3	89339527	0.0132957	8.36778e-07	23.5904
childhood absence epilepsy || id:ieu-b-13	ebi-a-GCST90016911	class Bacteroidia id.912	rs79585701	A	C	A	C	0.0646823	-0.00401304	NA	0.146079	FALSE	FALSE	FALSE	0.00216631	0.064	TRUE	8	13110185	0.0149628	9.98596e-06	18.6872
childhood absence epilepsy || id:ieu-b-13	ebi-a-GCST90016911	class Bacteroidia id.912	rs929878	T	C	T	C	0.0548532	6.63196e-05	NA	0.742688	FALSE	FALSE	FALSE	0.00174762	0.97	TRUE	16	74290641	0.012153	4.7338e-06	20.3722
childhood absence epilepsy || id:ieu-b-13	ebi-a-GCST90016912	class Betaproteobacteria id.2867	rs11128180	A	G	A	G	0.0592944	7.96168e-05	NA	0.230399	FALSE	FALSE	FALSE	0.00183642	0.97	TRUE	3	70592215	0.0128769	3.67147e-06	21.2034
childhood absence epilepsy || id:ieu-b-13	ebi-a-GCST90016912	class Betaproteobacteria id.2867	rs1511453	A	G	A	G	0.0923492	0.000230518	NA	0.0626243	FALSE	FALSE	FALSE	0.00318355	0.94	TRUE	4	23588462	0.0199158	4.75762e-06	21.5016
childhood absence epilepsy || id:ieu-b-13	ebi-a-GCST90016912	class Betaproteobacteria id.2867	rs1928341	G	A	G	A	-0.0525581	-9.88791e-05	NA	0.58774	FALSE	FALSE	FALSE	0.00159608	0.95	TRUE	1	153240013	0.0110408	2.0153e-06	22.661
childhood absence epilepsy || id:ieu-b-13	ebi-a-GCST90016912	class Betaproteobacteria id.2867	rs2321387	G	A	G	A	-0.0494596	-0.00191659	NA	0.461813	FALSE	FALSE	FALSE	0.0015534	0.22	TRUE	13	58689340	0.0109424	5.80029e-06	20.4304
childhood absence epilepsy || id:ieu-b-13	ebi-a-GCST90016912	class Betaproteobacteria id.2867	rs2613606	T	C	T	C	0.0513106	0.00215151	NA	0.569783	FALSE	FALSE	FALSE	0.00156046	0.17	TRUE	7	111285025	0.0109091	2.19816e-06	22.1226
childhood absence epilepsy || id:ieu-b-13	ebi-a-GCST90016912	class Betaproteobacteria id.2867	rs320161	G	A	G	A	-0.0572286	0.00192623	NA	0.739653	FALSE	FALSE	FALSE	0.00177399	0.28	TRUE	9	104899117	0.01262	7.33247e-06	20.564
childhood absence epilepsy || id:ieu-b-13	ebi-a-GCST90016912	class Betaproteobacteria id.2867	rs4033856	T	C	T	C	-0.0832423	0.00551282	NA	0.883164	FALSE	FALSE	FALSE	0.00244337	0.0239999	TRUE	4	45642485	0.0167237	5.17166e-07	24.7756
childhood absence epilepsy || id:ieu-b-13	ebi-a-GCST90016912	class Betaproteobacteria id.2867	rs56386628	C	T	C	T	-0.0622252	0.000963368	NA	0.197546	FALSE	FALSE	FALSE	0.0019277	0.62	TRUE	8	112732674	0.0135688	5.86949e-06	21.0305
childhood absence epilepsy || id:ieu-b-13	ebi-a-GCST90016912	class Betaproteobacteria id.2867	rs6087811	T	G	T	G	-0.0978177	-0.00242131	NA	0.0754257	FALSE	FALSE	FALSE	0.00294062	0.41	TRUE	20	30596130	0.0198522	7.44303e-07	24.2783
childhood absence epilepsy || id:ieu-b-13	ebi-a-GCST90016912	class Betaproteobacteria id.2867	rs62395635	T	C	T	C	0.109741	0.0029725	NA	0.0606494	FALSE	FALSE	FALSE	0.00325607	0.36	TRUE	5	173497796	0.0236	2.9409e-06	21.6229
childhood absence epilepsy || id:ieu-b-13	ebi-a-GCST90016912	class Betaproteobacteria id.2867	rs9964679	A	G	A	G	0.052911	-0.00117939	NA	0.30929	FALSE	FALSE	FALSE	0.00168067	0.48	TRUE	18	26569901	0.0114866	4.84585e-06	21.2182
childhood absence epilepsy || id:ieu-b-13	ebi-a-GCST90016913	class Clostridia id.1859	rs13179700	C	T	C	T	-0.0511937	0.00252823	NA	0.654671	FALSE	FALSE	FALSE	0.00161153	0.12	TRUE	5	149077788	0.0109569	3.37085e-06	21.8302
childhood absence epilepsy || id:ieu-b-13	ebi-a-GCST90016913	class Clostridia id.1859	rs1842454	G	A	G	A	-0.0547202	-0.00295386	NA	0.223293	FALSE	FALSE	FALSE	0.0018528	0.11	TRUE	5	105060362	0.0127338	8.72027e-06	18.4663
childhood absence epilepsy || id:ieu-b-13	ebi-a-GCST90016913	class Clostridia id.1859	rs6797343	T	G	T	G	-0.0592279	-0.00172161	NA	0.823972	FALSE	FALSE	FALSE	0.00199889	0.39	TRUE	3	89268714	0.0134556	9.35643e-06	19.3752
childhood absence epilepsy || id:ieu-b-13	ebi-a-GCST90016913	class Clostridia id.1859	rs6814436	C	T	C	T	-0.0739995	-0.000788806	NA	0.859428	FALSE	FALSE	FALSE	0.00220546	0.719999	TRUE	4	161507301	0.0150815	9.65095e-07	24.0751
childhood absence epilepsy || id:ieu-b-13	ebi-a-GCST90016913	class Clostridia id.1859	rs6815608	C	T	C	T	-0.103803	-0.000271314	NA	0.939014	FALSE	FALSE	FALSE	0.00320468	0.93	TRUE	4	152131744	0.0210883	4.01856e-07	24.2291
childhood absence epilepsy || id:ieu-b-13	ebi-a-GCST90016913	class Clostridia id.1859	rs992074	T	C	T	C	-0.255639	0.0063947	NA	0.952984	FALSE	FALSE	FALSE	0.00365874	0.0810009	TRUE	21	18567802	0.0508787	8.77506e-07	25.2454
childhood absence epilepsy || id:ieu-b-13	ebi-a-GCST90016914	class Coriobacteriia id.809	rs11250875	T	C	T	C	0.06075	0.000776443	NA	0.207617	FALSE	FALSE	FALSE	0.00189169	0.68	TRUE	10	1922731	0.0130939	4.82848e-06	21.5256
childhood absence epilepsy || id:ieu-b-13	ebi-a-GCST90016914	class Coriobacteriia id.809	rs1816223	G	A	G	A	0.0586265	-0.00281235	NA	0.789259	FALSE	FALSE	FALSE	0.00186818	0.13	TRUE	12	11494021	0.0129006	4.84117e-06	20.6523
childhood absence epilepsy || id:ieu-b-13	ebi-a-GCST90016914	class Coriobacteriia id.809	rs2442778	A	G	A	G	0.116408	0.00792356	NA	0.948931	FALSE	FALSE	FALSE	0.00348839	0.0230001	TRUE	3	11654412	0.0258545	9.02693e-06	20.2718
childhood absence epilepsy || id:ieu-b-13	ebi-a-GCST90016914	class Coriobacteriia id.809	rs719099	A	G	A	G	0.0778402	-0.00187986	NA	0.115403	FALSE	FALSE	FALSE	0.00240913	0.44	TRUE	10	65799217	0.0155815	5.43313e-07	24.9568
childhood absence epilepsy || id:ieu-b-13	ebi-a-GCST90016914	class Coriobacteriia id.809	rs8010111	A	G	A	G	0.103377	-0.00039206	NA	0.932689	FALSE	FALSE	FALSE	0.00307645	0.9	TRUE	14	39660509	0.0229286	6.8962e-06	20.3279
childhood absence epilepsy || id:ieu-b-13	ebi-a-GCST90016915	class Deltaproteobacteria id.3087	rs1035691	G	A	G	A	0.055176	-0.00116492	NA	0.636263	FALSE	FALSE	FALSE	0.00160037	0.47	TRUE	11	10658735	0.0121602	9.65162e-06	20.5882
childhood absence epilepsy || id:ieu-b-13	ebi-a-GCST90016915	class Deltaproteobacteria id.3087	rs112381107	C	T	C	T	0.206594	0.000286921	NA	0.0497705	FALSE	FALSE	FALSE	0.00352758	0.94	TRUE	9	15269705	0.0456908	4.63052e-06	20.4446
childhood absence epilepsy || id:ieu-b-13	ebi-a-GCST90016915	class Deltaproteobacteria id.3087	rs11599763	C	T	C	T	0.0544219	0.000651645	NA	0.615628	FALSE	FALSE	FALSE	0.00160988	0.69	TRUE	10	11855599	0.0117397	3.94121e-06	21.4899
childhood absence epilepsy || id:ieu-b-13	ebi-a-GCST90016915	class Deltaproteobacteria id.3087	rs17084793	G	A	G	A	-0.0710762	-0.00396636	NA	0.157547	FALSE	FALSE	FALSE	0.00214823	0.0649995	TRUE	18	69312914	0.015953	5.6863e-06	19.8501
childhood absence epilepsy || id:ieu-b-13	ebi-a-GCST90016915	class Deltaproteobacteria id.3087	rs3935584	C	T	C	T	-0.0523484	-1.45575e-05	NA	0.499012	FALSE	FALSE	FALSE	0.00152552	0.99	TRUE	2	233929283	0.011566	7.50119e-06	20.4852
childhood absence epilepsy || id:ieu-b-13	ebi-a-GCST90016915	class Deltaproteobacteria id.3087	rs55744759	A	G	A	G	-0.0779693	-0.00406759	NA	0.114278	FALSE	FALSE	FALSE	0.00240853	0.0909997	TRUE	8	57867671	0.0170738	7.31375e-06	20.8539
childhood absence epilepsy || id:ieu-b-13	ebi-a-GCST90016915	class Deltaproteobacteria id.3087	rs6058181	C	T	C	T	0.0825716	-0.00207549	NA	0.124315	FALSE	FALSE	FALSE	0.00232564	0.37	TRUE	20	33694801	0.0165958	3.39555e-07	24.7551
childhood absence epilepsy || id:ieu-b-13	ebi-a-GCST90016915	class Deltaproteobacteria id.3087	rs62020470	A	G	A	G	-0.0585411	-0.00228081	NA	0.271271	FALSE	FALSE	FALSE	0.0017346	0.19	TRUE	15	96161065	0.0129358	4.85087e-06	20.4802
childhood absence epilepsy || id:ieu-b-13	ebi-a-GCST90016915	class Deltaproteobacteria id.3087	rs9928243	C	A	C	A	-0.0538457	0.00038862	NA	0.415357	FALSE	FALSE	FALSE	0.00155817	0.8	TRUE	16	71541641	0.0117718	5.02077e-06	20.9226
childhood absence epilepsy || id:ieu-b-13	ebi-a-GCST90016916	class Erysipelotrichia id.2147	rs10781552	C	T	C	T	-0.0552212	-0.000875943	NA	0.30716	FALSE	FALSE	FALSE	0.00167973	0.6	TRUE	10	133897233	0.0116074	2.33115e-06	22.633
childhood absence epilepsy || id:ieu-b-13	ebi-a-GCST90016916	class Erysipelotrichia id.2147	rs1884466	C	T	C	T	-0.0475363	-0.00325764	NA	0.395298	FALSE	FALSE	FALSE	0.00158381	0.04	TRUE	1	64139196	0.0106939	9.52708e-06	19.7596
childhood absence epilepsy || id:ieu-b-13	ebi-a-GCST90016916	class Erysipelotrichia id.2147	rs2300774	A	G	A	G	-0.0524152	-0.0011747	NA	0.610035	FALSE	FALSE	FALSE	0.00157884	0.46	TRUE	3	195793712	0.0106784	8.95468e-07	24.0936
childhood absence epilepsy || id:ieu-b-13	ebi-a-GCST90016916	class Erysipelotrichia id.2147	rs35161940	T	C	T	C	-0.0806041	0.00406517	NA	0.107423	FALSE	FALSE	FALSE	0.00250515	0.1	TRUE	17	70327224	0.0167641	1.8451e-06	23.1182
childhood absence epilepsy || id:ieu-b-13	ebi-a-GCST90016916	class Erysipelotrichia id.2147	rs56970041	T	G	T	G	0.0724145	-0.000690607	NA	0.0991089	FALSE	FALSE	FALSE	0.00258506	0.79	TRUE	14	80357610	0.0164471	5.40344e-06	19.3853
childhood absence epilepsy || id:ieu-b-13	ebi-a-GCST90016916	class Erysipelotrichia id.2147	rs7234058	T	C	T	C	-0.0945759	-0.00309405	NA	0.0908211	FALSE	FALSE	FALSE	0.00271453	0.25	TRUE	18	5830507	0.0194091	9.12347e-07	23.7438
childhood absence epilepsy || id:ieu-b-13	ebi-a-GCST90016916	class Erysipelotrichia id.2147	rs8003149	C	T	C	T	0.0538798	0.0013523	NA	0.27638	FALSE	FALSE	FALSE	0.0017159	0.43	TRUE	14	56156504	0.0116888	4.08479e-06	21.2477
childhood absence epilepsy || id:ieu-b-13	ebi-a-GCST90016917	class Gammaproteobacteria id.3303	rs11181912	G	A	G	A	-0.0579153	-0.00166936	NA	0.325472	FALSE	FALSE	FALSE	0.00165121	0.31	TRUE	12	43572952	0.0118796	9.94764e-07	23.7675
childhood absence epilepsy || id:ieu-b-13	ebi-a-GCST90016917	class Gammaproteobacteria id.3303	rs12404135	A	G	A	G	-0.0788843	-3.38124e-06	NA	0.126633	FALSE	FALSE	FALSE	0.00229639	1	TRUE	1	186502694	0.0172415	8.89488e-06	20.933
childhood absence epilepsy || id:ieu-b-13	ebi-a-GCST90016917	class Gammaproteobacteria id.3303	rs6706173	A	C	A	C	0.074251	0.00441016	NA	0.160689	FALSE	FALSE	FALSE	0.00208342	0.0340001	TRUE	2	167986992	0.0146392	1.99494e-07	25.7259
childhood absence epilepsy || id:ieu-b-13	ebi-a-GCST90016917	class Gammaproteobacteria id.3303	rs75101789	C	T	C	T	0.0729012	-0.00131855	NA	0.122904	FALSE	FALSE	FALSE	0.00235359	0.58	TRUE	3	18615903	0.0163003	8.7878e-06	20.0022
childhood absence epilepsy || id:ieu-b-13	ebi-a-GCST90016918	class Lentisphaeria id.2250	rs11770843	C	T	C	T	0.109431	-1.52473e-05	NA	0.285616	FALSE	FALSE	FALSE	0.00170917	0.99	TRUE	7	146795379	0.0234879	1.9073e-06	21.7066
childhood absence epilepsy || id:ieu-b-13	ebi-a-GCST90016918	class Lentisphaeria id.2250	rs62570196	C	T	C	T	-0.21635	0.00147909	NA	0.0642473	FALSE	FALSE	FALSE	0.00317259	0.64	TRUE	9	111086170	0.0439866	1.07924e-06	24.1921
childhood absence epilepsy || id:ieu-b-13	ebi-a-GCST90016918	class Lentisphaeria id.2250	rs72640280	A	G	A	G	0.220207	-0.00229495	NA	0.0540293	FALSE	FALSE	FALSE	0.00342697	0.5	TRUE	1	11943792	0.0486196	5.18036e-06	20.5135
childhood absence epilepsy || id:ieu-b-13	ebi-a-GCST90016919	class Melainabacteria id.1589	rs10738747	A	G	A	G	-0.0814624	8.69037e-05	NA	0.51531	FALSE	FALSE	FALSE	0.00154658	0.96	TRUE	9	26184578	0.0184409	9.95795e-06	19.5142
childhood absence epilepsy || id:ieu-b-13	ebi-a-GCST90016919	class Melainabacteria id.1589	rs11150282	T	C	T	C	0.0989487	-0.00599727	NA	0.316864	FALSE	FALSE	FALSE	0.00165437	0.000290001	TRUE	16	80493705	0.0196972	6.02893e-07	25.2355
childhood absence epilepsy || id:ieu-b-13	ebi-a-GCST90016919	class Melainabacteria id.1589	rs113884518	T	C	T	C	-0.205352	-0.00637157	NA	0.050581	FALSE	FALSE	FALSE	0.00351704	0.0700003	TRUE	9	24648997	0.0454982	8.05675e-06	20.3709
childhood absence epilepsy || id:ieu-b-13	ebi-a-GCST90016919	class Melainabacteria id.1589	rs367480	A	G	A	G	0.083758	0.00114778	NA	0.577329	FALSE	FALSE	FALSE	0.00155697	0.46	TRUE	11	2937631	0.0185796	8.19917e-06	20.3226
childhood absence epilepsy || id:ieu-b-13	ebi-a-GCST90016919	class Melainabacteria id.1589	rs4129395	G	A	G	A	0.0896187	0.000108895	NA	0.441551	FALSE	FALSE	FALSE	0.00156289	0.94	TRUE	9	115975389	0.0185106	1.48057e-06	23.4399
childhood absence epilepsy || id:ieu-b-13	ebi-a-GCST90016919	class Melainabacteria id.1589	rs789069	A	C	A	C	-0.103539	-0.00195482	NA	0.175794	FALSE	FALSE	FALSE	0.00202284	0.33	TRUE	18	1008278	0.0234287	6.84636e-06	19.5304
childhood absence epilepsy || id:ieu-b-13	ebi-a-GCST90016919	class Melainabacteria id.1589	rs9864379	T	C	T	C	-0.159735	0.00176626	NA	0.106932	FALSE	FALSE	FALSE	0.00248599	0.48	TRUE	3	14306949	0.0292553	5.36056e-08	29.812
childhood absence epilepsy || id:ieu-b-13	ebi-a-GCST90016920	class Methanobacteria id.119	rs10202904	G	T	G	T	0.121754	-0.00339672	NA	0.577454	FALSE	FALSE	FALSE	0.00155454	0.0290001	TRUE	2	125440268	0.0235357	3.01432e-07	26.7616
childhood absence epilepsy || id:ieu-b-13	ebi-a-GCST90016920	class Methanobacteria id.119	rs56131665	G	A	G	A	0.178661	-0.000128433	NA	0.0926134	FALSE	FALSE	FALSE	0.00270231	0.96	TRUE	5	178160975	0.039298	6.17988e-06	20.669
childhood absence epilepsy || id:ieu-b-13	ebi-a-GCST90016920	class Methanobacteria id.119	rs6776814	T	C	T	C	-0.199566	-0.0029106	NA	0.0905988	FALSE	FALSE	FALSE	0.00268246	0.28	TRUE	3	15053083	0.0411825	1.63061e-06	23.4827
childhood absence epilepsy || id:ieu-b-13	ebi-a-GCST90016920	class Methanobacteria id.119	rs73068003	G	T	G	T	-0.15814	-0.00189399	NA	0.123415	FALSE	FALSE	FALSE	0.00237931	0.43	TRUE	7	10773932	0.0351803	8.44578e-06	20.2062
childhood absence epilepsy || id:ieu-b-13	ebi-a-GCST90016920	class Methanobacteria id.119	rs73457410	A	G	A	G	0.21534	-0.000257506	NA	0.0728292	FALSE	FALSE	FALSE	0.00298052	0.93	TRUE	13	41956181	0.0436695	1.40854e-06	24.316
childhood absence epilepsy || id:ieu-b-13	ebi-a-GCST90016920	class Methanobacteria id.119	rs75208022	C	T	C	T	-0.227245	8.18229e-05	NA	0.0713594	FALSE	FALSE	FALSE	0.00297578	0.98	TRUE	12	21338861	0.048763	5.92107e-06	21.7174
childhood absence epilepsy || id:ieu-b-13	ebi-a-GCST90016920	class Methanobacteria id.119	rs894996	C	A	C	A	0.216999	-0.00103535	NA	0.0771305	FALSE	FALSE	FALSE	0.00288544	0.719999	TRUE	4	104418307	0.0449076	1.87556e-06	23.3494
childhood absence epilepsy || id:ieu-b-13	ebi-a-GCST90016921	class Mollicutes id.3920	rs11890098	A	G	A	G	0.074438	0.000407708	NA	0.244783	FALSE	FALSE	FALSE	0.00178174	0.82	TRUE	2	157532549	0.0153389	9.56577e-07	23.5505
childhood absence epilepsy || id:ieu-b-13	ebi-a-GCST90016921	class Mollicutes id.3920	rs12566890	T	G	T	G	-0.101147	0.00343213	NA	0.0804591	FALSE	FALSE	FALSE	0.00283603	0.23	TRUE	1	61850864	0.0230978	3.65098e-06	19.1763
childhood absence epilepsy || id:ieu-b-13	ebi-a-GCST90016921	class Mollicutes id.3920	rs17214486	C	A	C	A	0.06099	-0.000632661	NA	0.385951	FALSE	FALSE	FALSE	0.00160157	0.69	TRUE	14	97159674	0.0135623	6.60861e-06	20.2232
childhood absence epilepsy || id:ieu-b-13	ebi-a-GCST90016921	class Mollicutes id.3920	rs2464826	A	C	A	C	0.0944239	0.00374172	NA	0.115649	FALSE	FALSE	FALSE	0.00242217	0.12	TRUE	7	79490250	0.0211806	8.39499e-06	19.8741
childhood absence epilepsy || id:ieu-b-13	ebi-a-GCST90016921	class Mollicutes id.3920	rs28537087	G	A	G	A	0.0820873	0.0041697	NA	0.142004	FALSE	FALSE	FALSE	0.00221223	0.0589997	TRUE	15	95309676	0.0188312	8.07402e-06	19.0019
childhood absence epilepsy || id:ieu-b-13	ebi-a-GCST90016921	class Mollicutes id.3920	rs3768491	G	A	G	A	0.0681052	-0.000637326	NA	0.720449	FALSE	FALSE	FALSE	0.00169905	0.709999	TRUE	1	109965986	0.0149061	4.2335e-06	20.8753
childhood absence epilepsy || id:ieu-b-13	ebi-a-GCST90016921	class Mollicutes id.3920	rs4885016	C	T	C	T	0.0819606	0.000610133	NA	0.848831	FALSE	FALSE	FALSE	0.00216376	0.780001	TRUE	13	73170489	0.0181628	7.26993e-06	20.3631
childhood absence epilepsy || id:ieu-b-13	ebi-a-GCST90016921	class Mollicutes id.3920	rs72901605	T	C	T	C	-0.0841852	0.00262429	NA	0.187278	FALSE	FALSE	FALSE	0.00199508	0.19	TRUE	11	47103877	0.0178119	3.25792e-06	22.3383
childhood absence epilepsy || id:ieu-b-13	ebi-a-GCST90016921	class Mollicutes id.3920	rs78169027	A	G	A	G	-0.108283	-0.000326314	NA	0.0954423	FALSE	FALSE	FALSE	0.00264214	0.9	TRUE	11	108439087	0.0237289	5.87611e-06	20.8241
childhood absence epilepsy || id:ieu-b-13	ebi-a-GCST90016922	class Negativicutes id.2164	rs13086907	G	A	G	A	0.0625312	-0.000649149	NA	0.211104	FALSE	FALSE	FALSE	0.00190617	0.73	TRUE	3	142135117	0.0131735	1.95488e-06	22.5316
childhood absence epilepsy || id:ieu-b-13	ebi-a-GCST90016922	class Negativicutes id.2164	rs1643968	T	C	T	C	-0.0565284	-0.00284947	NA	0.303981	FALSE	FALSE	FALSE	0.00167992	0.0899995	TRUE	5	165266628	0.0112298	4.14601e-07	25.339
childhood absence epilepsy || id:ieu-b-13	ebi-a-GCST90016922	class Negativicutes id.2164	rs4722181	T	G	T	G	0.0501306	0.000191905	NA	0.490024	FALSE	FALSE	FALSE	0.00153656	0.9	TRUE	7	22817571	0.0105798	2.00111e-06	22.4518
childhood absence epilepsy || id:ieu-b-13	ebi-a-GCST90016922	class Negativicutes id.2164	rs61249479	A	C	A	C	0.0777075	-0.000111331	NA	0.0994192	FALSE	FALSE	FALSE	0.00255469	0.97	TRUE	9	124912908	0.0168628	2.95474e-06	21.2357
childhood absence epilepsy || id:ieu-b-13	ebi-a-GCST90016922	class Negativicutes id.2164	rs9423647	G	A	G	A	0.047817	0.000498841	NA	0.505647	FALSE	FALSE	FALSE	0.00154611	0.75	TRUE	10	5579818	0.0105282	6.06108e-06	20.628
childhood absence epilepsy || id:ieu-b-13	ebi-a-GCST90016923	class Verrucomicrobiae id.4029	rs117107102	A	G	A	G	0.204683	0.00027616	NA	0.0324577	FALSE	FALSE	FALSE	0.00438483	0.95	TRUE	18	49473635	0.0431572	2.91823e-06	22.4935
childhood absence epilepsy || id:ieu-b-13	ebi-a-GCST90016923	class Verrucomicrobiae id.4029	rs11729256	T	C	T	C	0.0749798	0.00133243	NA	0.24506	FALSE	FALSE	FALSE	0.00178557	0.46	TRUE	4	95027272	0.0150177	6.73085e-07	24.9277
childhood absence epilepsy || id:ieu-b-13	ebi-a-GCST90016923	class Verrucomicrobiae id.4029	rs12908520	G	A	G	A	0.0618926	0.00237686	NA	0.442542	FALSE	FALSE	FALSE	0.0015538	0.13	TRUE	15	97570657	0.0130946	2.17165e-06	22.3405
childhood absence epilepsy || id:ieu-b-13	ebi-a-GCST90016923	class Verrucomicrobiae id.4029	rs4936098	G	A	G	A	-0.0648843	0.00092994	NA	0.635886	FALSE	FALSE	FALSE	0.00162725	0.57	TRUE	11	130280667	0.0135928	1.1222e-06	22.7856
childhood absence epilepsy || id:ieu-b-13	ebi-a-GCST90016923	class Verrucomicrobiae id.4029	rs61779207	G	A	G	A	-0.0758309	-0.000978528	NA	0.184396	FALSE	FALSE	FALSE	0.00199653	0.62	TRUE	1	41074472	0.0167762	6.7228e-06	20.4317
childhood absence epilepsy || id:ieu-b-13	ebi-a-GCST90016923	class Verrucomicrobiae id.4029	rs74542928	T	C	T	C	0.112164	0.000439203	NA	0.0949238	FALSE	FALSE	FALSE	0.00262694	0.87	TRUE	4	100544188	0.0236422	1.63222e-06	22.5077
childhood absence epilepsy || id:ieu-b-13	ebi-a-GCST90016923	class Verrucomicrobiae id.4029	rs9349825	A	G	A	G	-0.0704036	-0.00239208	NA	0.267495	FALSE	FALSE	FALSE	0.00175039	0.17	TRUE	6	56341481	0.0147128	2.53688e-06	22.8981
childhood absence epilepsy || id:ieu-b-13	ebi-a-GCST90016923	class Verrucomicrobiae id.4029	rs941682	G	A	G	A	-0.0631436	-0.00055634	NA	0.279344	FALSE	FALSE	FALSE	0.00172307	0.75	TRUE	20	31867840	0.0143767	9.60993e-06	19.2904
childhood absence epilepsy || id:ieu-b-13	ebi-a-GCST90016924	family Acidaminococcaceae id.2166	rs2933324	G	A	G	A	0.0662557	0.000234434	NA	0.722143	FALSE	FALSE	FALSE	0.00171629	0.89	TRUE	9	107117653	0.0140257	2.23676e-06	22.315
childhood absence epilepsy || id:ieu-b-13	ebi-a-GCST90016924	family Acidaminococcaceae id.2166	rs6923842	T	C	T	C	-0.0796106	0.00151245	NA	0.182988	FALSE	FALSE	FALSE	0.00199275	0.450001	TRUE	6	5723181	0.0169192	2.21304e-06	22.1402
childhood absence epilepsy || id:ieu-b-13	ebi-a-GCST90016925	family Actinomycetaceae id.421	rs2889192	T	G	T	G	-0.0887537	-0.000946056	NA	0.78175	FALSE	FALSE	FALSE	0.00186812	0.61	TRUE	9	76394568	0.0195009	3.64418e-06	20.714
childhood absence epilepsy || id:ieu-b-13	ebi-a-GCST90016925	family Actinomycetaceae id.421	rs34583783	G	T	G	T	0.123756	-0.00334917	NA	0.108226	FALSE	FALSE	FALSE	0.00247019	0.18	TRUE	6	67207371	0.026427	5.47974e-06	21.9299
childhood absence epilepsy || id:ieu-b-13	ebi-a-GCST90016926	family Alcaligenaceae id.2875	rs112135816	T	G	T	G	-0.0775052	0.00163043	NA	0.113244	FALSE	FALSE	FALSE	0.00245371	0.51	TRUE	9	82485327	0.0171554	5.27667e-06	20.4108
childhood absence epilepsy || id:ieu-b-13	ebi-a-GCST90016926	family Alcaligenaceae id.2875	rs1153990	A	G	A	G	-0.058727	-0.000936279	NA	0.235746	FALSE	FALSE	FALSE	0.00180822	0.6	TRUE	5	104233461	0.0128306	5.96788e-06	20.9499
childhood absence epilepsy || id:ieu-b-13	ebi-a-GCST90016926	family Alcaligenaceae id.2875	rs4033856	T	C	T	C	-0.081834	0.00551282	NA	0.883164	FALSE	FALSE	FALSE	0.00244337	0.0239999	TRUE	4	45642485	0.0168931	1.02903e-06	23.4665
childhood absence epilepsy || id:ieu-b-13	ebi-a-GCST90016926	family Alcaligenaceae id.2875	rs62395635	T	C	T	C	0.110583	0.0029725	NA	0.0606494	FALSE	FALSE	FALSE	0.00325607	0.36	TRUE	5	173497796	0.0238514	3.34696e-06	21.4956
childhood absence epilepsy || id:ieu-b-13	ebi-a-GCST90016926	family Alcaligenaceae id.2875	rs6969323	A	C	A	C	-0.0593564	-0.00213559	NA	0.232105	FALSE	FALSE	FALSE	0.00183989	0.25	TRUE	7	104214487	0.0129137	3.8858e-06	21.1268
childhood absence epilepsy || id:ieu-b-13	ebi-a-GCST90016926	family Alcaligenaceae id.2875	rs7638039	T	C	T	C	0.0603335	0.00124671	NA	0.240122	FALSE	FALSE	FALSE	0.00181846	0.49	TRUE	3	70588939	0.0127779	2.70477e-06	22.2945
childhood absence epilepsy || id:ieu-b-13	ebi-a-GCST90016926	family Alcaligenaceae id.2875	rs9964679	A	G	A	G	0.0537051	-0.00117939	NA	0.30929	FALSE	FALSE	FALSE	0.00168067	0.48	TRUE	18	26569901	0.0116008	4.47384e-06	21.4316
childhood absence epilepsy || id:ieu-b-13	ebi-a-GCST90016927	family Bacteroidaceae id.917	rs11585893	A	G	A	G	-0.0740746	0.00265051	NA	0.142238	FALSE	FALSE	FALSE	0.00224219	0.24	TRUE	1	10644351	0.0147633	1.79511e-06	25.1751
childhood absence epilepsy || id:ieu-b-13	ebi-a-GCST90016927	family Bacteroidaceae id.917	rs1340391	T	C	T	C	-0.0592004	0.00134073	NA	0.195054	FALSE	FALSE	FALSE	0.00192974	0.49	TRUE	1	102960989	0.0132244	6.73008e-06	20.04
childhood absence epilepsy || id:ieu-b-13	ebi-a-GCST90016927	family Bacteroidaceae id.917	rs17619981	T	G	T	G	0.0880978	-0.00131809	NA	0.0946088	FALSE	FALSE	FALSE	0.00263557	0.62	TRUE	19	24342250	0.0187002	2.68683e-06	22.1941
childhood absence epilepsy || id:ieu-b-13	ebi-a-GCST90016927	family Bacteroidaceae id.917	rs6795673	C	T	C	T	0.0538565	-0.00233529	NA	0.437978	FALSE	FALSE	FALSE	0.00154168	0.13	TRUE	3	10593224	0.0105251	3.37909e-07	26.1833
childhood absence epilepsy || id:ieu-b-13	ebi-a-GCST90016927	family Bacteroidaceae id.917	rs9507307	C	T	C	T	0.0604456	0.000327171	NA	0.191172	FALSE	FALSE	FALSE	0.00197749	0.87	TRUE	13	24910476	0.0129128	2.12711e-06	21.9123
childhood absence epilepsy || id:ieu-b-13	ebi-a-GCST90016928	family Bacteroidales S24 7group id.11173	rs17043785	T	C	T	C	-0.176187	0.000260166	NA	0.0558985	FALSE	FALSE	FALSE	0.0033145	0.94	TRUE	2	53139362	0.0347133	5.11835e-07	25.7606
childhood absence epilepsy || id:ieu-b-13	ebi-a-GCST90016928	family Bacteroidales S24 7group id.11173	rs61508842	T	C	T	C	0.122574	0.00230768	NA	0.104319	FALSE	FALSE	FALSE	0.00253394	0.36	TRUE	3	158653545	0.0272389	7.82781e-06	20.2497
childhood absence epilepsy || id:ieu-b-13	ebi-a-GCST90016928	family Bacteroidales S24 7group id.11173	rs78609301	A	G	A	G	-0.0867065	-0.00109481	NA	0.205613	FALSE	FALSE	FALSE	0.00188814	0.56	TRUE	6	63236747	0.0195709	7.093e-06	19.6283
childhood absence epilepsy || id:ieu-b-13	ebi-a-GCST90016929	family Bifidobacteriaceae id.433	rs10831953	G	A	G	A	0.0537537	0.00189261	NA	0.347135	FALSE	FALSE	FALSE	0.00162018	0.24	TRUE	11	13098051	0.0123746	9.94741e-06	18.8692
childhood absence epilepsy || id:ieu-b-13	ebi-a-GCST90016929	family Bifidobacteriaceae id.433	rs55888705	A	G	A	G	0.053673	0.00178503	NA	0.364234	FALSE	FALSE	FALSE	0.00160834	0.27	TRUE	4	1517826	0.0120586	8.66204e-06	19.8115
childhood absence epilepsy || id:ieu-b-13	ebi-a-GCST90016929	family Bifidobacteriaceae id.433	rs6899771	A	G	A	G	-0.0914312	0.00198249	NA	0.0888353	FALSE	FALSE	FALSE	0.00268497	0.46	TRUE	6	97406220	0.0202604	7.27998e-06	20.3654
childhood absence epilepsy || id:ieu-b-13	ebi-a-GCST90016929	family Bifidobacteriaceae id.433	rs7174549	T	C	T	C	-0.0551726	0.00181551	NA	0.660333	FALSE	FALSE	FALSE	0.00163219	0.27	TRUE	15	92463303	0.0124655	6.86784e-06	19.5897
childhood absence epilepsy || id:ieu-b-13	ebi-a-GCST90016929	family Bifidobacteriaceae id.433	rs857444	C	T	C	T	0.0553965	-0.000855925	NA	0.349909	FALSE	FALSE	FALSE	0.00159483	0.59	TRUE	6	14617591	0.0120669	3.8249e-06	21.0753
childhood absence epilepsy || id:ieu-b-13	ebi-a-GCST90016931	family Clostridiaceae1 id.1869	rs10875374	T	C	T	C	0.0536759	-0.000415068	NA	0.559669	FALSE	FALSE	FALSE	0.00154783	0.79	TRUE	1	101804809	0.0119436	8.09823e-06	20.1971
childhood absence epilepsy || id:ieu-b-13	ebi-a-GCST90016931	family Clostridiaceae1 id.1869	rs12186080	G	A	G	A	0.0748236	-0.0004983	NA	0.160248	FALSE	FALSE	FALSE	0.0020939	0.81	TRUE	3	132596627	0.016246	5.33962e-06	21.2121
childhood absence epilepsy || id:ieu-b-13	ebi-a-GCST90016931	family Clostridiaceae1 id.1869	rs12341505	G	A	G	A	0.0814503	0.00185658	NA	0.1257	FALSE	FALSE	FALSE	0.00232926	0.43	TRUE	9	136710881	0.0179338	4.54485e-06	20.6272
childhood absence epilepsy || id:ieu-b-13	ebi-a-GCST90016931	family Clostridiaceae1 id.1869	rs62397761	A	G	A	G	0.0615805	0.00465824	NA	0.272146	FALSE	FALSE	FALSE	0.00174056	0.00739997	TRUE	6	48093014	0.0136198	9.07716e-06	20.443
childhood absence epilepsy || id:ieu-b-13	ebi-a-GCST90016931	family Clostridiaceae1 id.1869	rs881532	G	A	G	A	0.0533035	-0.000690019	NA	0.514027	FALSE	FALSE	FALSE	0.00155923	0.66	TRUE	22	47806774	0.0119011	7.8966e-06	20.0603
childhood absence epilepsy || id:ieu-b-13	ebi-a-GCST90016932	family Clostridiales vadin BB60 group id.11286	rs10517600	G	T	G	T	-0.0626993	0.00149133	NA	0.469664	FALSE	FALSE	FALSE	0.00153455	0.33	TRUE	4	155632958	0.0139364	6.82763e-06	20.2406
childhood absence epilepsy || id:ieu-b-13	ebi-a-GCST90016932	family Clostridiales vadin BB60 group id.11286	rs10904722	C	T	C	T	-0.0672314	-0.000679378	NA	0.310372	FALSE	FALSE	FALSE	0.0016661	0.68	TRUE	10	6714424	0.0147123	5.04836e-06	20.8825
childhood absence epilepsy || id:ieu-b-13	ebi-a-GCST90016932	family Clostridiales vadin BB60 group id.11286	rs13409132	A	G	A	G	-0.165419	-0.0029639	NA	0.0534763	FALSE	FALSE	FALSE	0.00342223	0.39	TRUE	2	205616346	0.0352154	4.3723e-06	22.0651
childhood absence epilepsy || id:ieu-b-13	ebi-a-GCST90016932	family Clostridiales vadin BB60 group id.11286	rs17121075	G	A	G	A	0.0769254	0.00182086	NA	0.19187	FALSE	FALSE	FALSE	0.0019736	0.36	TRUE	14	85856796	0.0172234	7.91425e-06	19.9481
childhood absence epilepsy || id:ieu-b-13	ebi-a-GCST90016932	family Clostridiales vadin BB60 group id.11286	rs2191834	T	G	T	G	-0.0746375	0.001988	NA	0.747399	FALSE	FALSE	FALSE	0.00176815	0.26	TRUE	2	229942951	0.0159136	2.50196e-06	21.9977
childhood absence epilepsy || id:ieu-b-13	ebi-a-GCST90016932	family Clostridiales vadin BB60 group id.11286	rs28691777	C	T	C	T	0.137134	-0.000852564	NA	0.0697185	FALSE	FALSE	FALSE	0.00301591	0.780001	TRUE	17	58149405	0.0266996	6.95697e-07	26.3804
childhood absence epilepsy || id:ieu-b-13	ebi-a-GCST90016932	family Clostridiales vadin BB60 group id.11286	rs55682560	C	T	C	T	-0.131519	-0.00408054	NA	0.0751252	FALSE	FALSE	FALSE	0.00292198	0.16	TRUE	15	87392290	0.0261319	4.97038e-07	25.33
childhood absence epilepsy || id:ieu-b-13	ebi-a-GCST90016932	family Clostridiales vadin BB60 group id.11286	rs6588624	A	G	A	G	0.0662317	0.000293611	NA	0.505284	FALSE	FALSE	FALSE	0.00153087	0.85	TRUE	1	56849539	0.0138147	1.79287e-06	22.9852
childhood absence epilepsy || id:ieu-b-13	ebi-a-GCST90016932	family Clostridiales vadin BB60 group id.11286	rs66714985	A	C	A	C	0.116908	-0.000600522	NA	0.072662	FALSE	FALSE	FALSE	0.0029762	0.84	TRUE	8	3305122	0.0252447	4.85333e-06	21.4461
childhood absence epilepsy || id:ieu-b-13	ebi-a-GCST90016932	family Clostridiales vadin BB60 group id.11286	rs7226487	A	G	A	G	-0.0643682	2.51768e-05	NA	0.450649	FALSE	FALSE	FALSE	0.00155038	0.99	TRUE	18	74373125	0.0138701	3.58286e-06	21.5369
childhood absence epilepsy || id:ieu-b-13	ebi-a-GCST90016932	family Clostridiales vadin BB60 group id.11286	rs7725895	A	G	A	G	-0.116224	-0.00385376	NA	0.0706651	FALSE	FALSE	FALSE	0.00300444	0.2	TRUE	5	142244898	0.0240367	3.94357e-06	23.3799
childhood absence epilepsy || id:ieu-b-13	ebi-a-GCST90016932	family Clostridiales vadin BB60 group id.11286	rs989682	A	G	A	G	0.070194	-0.00450517	NA	0.289158	FALSE	FALSE	FALSE	0.00170137	0.00809991	TRUE	3	15564453	0.0155364	6.84715e-06	20.4126
childhood absence epilepsy || id:ieu-b-13	ebi-a-GCST90016933	family Coriobacteriaceae id.811	rs11250875	T	C	T	C	0.06075	0.000776443	NA	0.207617	FALSE	FALSE	FALSE	0.00189169	0.68	TRUE	10	1922731	0.0130939	4.82848e-06	21.5256
childhood absence epilepsy || id:ieu-b-13	ebi-a-GCST90016933	family Coriobacteriaceae id.811	rs1816223	G	A	G	A	0.0586265	-0.00281235	NA	0.789259	FALSE	FALSE	FALSE	0.00186818	0.13	TRUE	12	11494021	0.0129006	4.84117e-06	20.6523
childhood absence epilepsy || id:ieu-b-13	ebi-a-GCST90016933	family Coriobacteriaceae id.811	rs2442778	A	G	A	G	0.116408	0.00792356	NA	0.948931	FALSE	FALSE	FALSE	0.00348839	0.0230001	TRUE	3	11654412	0.0258545	9.02693e-06	20.2718
childhood absence epilepsy || id:ieu-b-13	ebi-a-GCST90016933	family Coriobacteriaceae id.811	rs719099	A	G	A	G	0.0778402	-0.00187986	NA	0.115403	FALSE	FALSE	FALSE	0.00240913	0.44	TRUE	10	65799217	0.0155815	5.43313e-07	24.9568
childhood absence epilepsy || id:ieu-b-13	ebi-a-GCST90016933	family Coriobacteriaceae id.811	rs8010111	A	G	A	G	0.103377	-0.00039206	NA	0.932689	FALSE	FALSE	FALSE	0.00307645	0.9	TRUE	14	39660509	0.0229286	6.8962e-06	20.3279
childhood absence epilepsy || id:ieu-b-13	ebi-a-GCST90016934	family Defluviitaleaceae id.1924	rs17051335	C	T	C	T	-0.134314	-0.00189416	NA	0.0733108	FALSE	FALSE	FALSE	0.00295348	0.52	TRUE	4	122202910	0.0292201	4.58121e-06	21.129
childhood absence epilepsy || id:ieu-b-13	ebi-a-GCST90016934	family Defluviitaleaceae id.1924	rs4344384	T	G	T	G	-0.0708803	0.000135285	NA	0.511889	FALSE	FALSE	FALSE	0.00155753	0.93	TRUE	10	66407366	0.0156121	5.86017e-06	20.6124
childhood absence epilepsy || id:ieu-b-13	ebi-a-GCST90016934	family Defluviitaleaceae id.1924	rs9725395	A	G	A	G	-0.138357	0.00260349	NA	0.077641	FALSE	FALSE	FALSE	0.00287234	0.36	TRUE	1	85205632	0.0295185	3.41374e-06	21.9692
childhood absence epilepsy || id:ieu-b-13	ebi-a-GCST90016935	family Desulfovibrionaceae id.3169	rs112381107	C	T	C	T	0.211435	0.000286921	NA	0.0497705	FALSE	FALSE	FALSE	0.00352758	0.94	TRUE	9	15269705	0.0456962	2.81877e-06	21.4089
childhood absence epilepsy || id:ieu-b-13	ebi-a-GCST90016935	family Desulfovibrionaceae id.3169	rs11599763	C	T	C	T	0.0555931	0.000651645	NA	0.615628	FALSE	FALSE	FALSE	0.00160988	0.69	TRUE	10	11855599	0.0117493	2.49701e-06	22.3881
childhood absence epilepsy || id:ieu-b-13	ebi-a-GCST90016935	family Desulfovibrionaceae id.3169	rs3935584	C	T	C	T	-0.0525838	-1.45575e-05	NA	0.499012	FALSE	FALSE	FALSE	0.00152552	0.99	TRUE	2	233929283	0.0115757	6.78141e-06	20.6352
childhood absence epilepsy || id:ieu-b-13	ebi-a-GCST90016935	family Desulfovibrionaceae id.3169	rs6058181	C	T	C	T	0.0834742	-0.00207549	NA	0.124315	FALSE	FALSE	FALSE	0.00232564	0.37	TRUE	20	33694801	0.0166111	2.69911e-07	25.2527
childhood absence epilepsy || id:ieu-b-13	ebi-a-GCST90016935	family Desulfovibrionaceae id.3169	rs72647048	T	C	T	C	-0.0770089	-0.00400544	NA	0.114372	FALSE	FALSE	FALSE	0.00240618	0.0959997	TRUE	8	57865378	0.017089	9.60882e-06	20.3071
childhood absence epilepsy || id:ieu-b-13	ebi-a-GCST90016935	family Desulfovibrionaceae id.3169	rs9928243	C	A	C	A	-0.0541732	0.00038862	NA	0.415357	FALSE	FALSE	FALSE	0.00155817	0.8	TRUE	16	71541641	0.0117819	4.48477e-06	21.1416
childhood absence epilepsy || id:ieu-b-13	ebi-a-GCST90016936	family Enterobacteriaceae id.3469	rs2374342	C	A	C	A	0.0582927	-0.000499033	NA	0.359383	FALSE	FALSE	FALSE	0.00159437	0.75	TRUE	2	42133542	0.0126195	4.51617e-06	21.3375
childhood absence epilepsy || id:ieu-b-13	ebi-a-GCST90016936	family Enterobacteriaceae id.3469	rs504442	T	G	T	G	0.084159	0.000998545	NA	0.11698	FALSE	FALSE	FALSE	0.00240023	0.68	TRUE	18	55145547	0.0189479	5.17095e-06	19.7278
childhood absence epilepsy || id:ieu-b-13	ebi-a-GCST90016937	family Erysipelotrichaceae id.2149	rs10781552	C	T	C	T	-0.0552212	-0.000875943	NA	0.30716	FALSE	FALSE	FALSE	0.00167973	0.6	TRUE	10	133897233	0.0116074	2.33115e-06	22.633
childhood absence epilepsy || id:ieu-b-13	ebi-a-GCST90016937	family Erysipelotrichaceae id.2149	rs1884466	C	T	C	T	-0.0475363	-0.00325764	NA	0.395298	FALSE	FALSE	FALSE	0.00158381	0.04	TRUE	1	64139196	0.0106939	9.52708e-06	19.7596
childhood absence epilepsy || id:ieu-b-13	ebi-a-GCST90016937	family Erysipelotrichaceae id.2149	rs2300774	A	G	A	G	-0.0524152	-0.0011747	NA	0.610035	FALSE	FALSE	FALSE	0.00157884	0.46	TRUE	3	195793712	0.0106784	8.95468e-07	24.0936
childhood absence epilepsy || id:ieu-b-13	ebi-a-GCST90016937	family Erysipelotrichaceae id.2149	rs35161940	T	C	T	C	-0.0806041	0.00406517	NA	0.107423	FALSE	FALSE	FALSE	0.00250515	0.1	TRUE	17	70327224	0.0167641	1.8451e-06	23.1182
childhood absence epilepsy || id:ieu-b-13	ebi-a-GCST90016937	family Erysipelotrichaceae id.2149	rs56970041	T	G	T	G	0.0724145	-0.000690607	NA	0.0991089	FALSE	FALSE	FALSE	0.00258506	0.79	TRUE	14	80357610	0.0164471	5.40344e-06	19.3853
childhood absence epilepsy || id:ieu-b-13	ebi-a-GCST90016937	family Erysipelotrichaceae id.2149	rs7234058	T	C	T	C	-0.0945759	-0.00309405	NA	0.0908211	FALSE	FALSE	FALSE	0.00271453	0.25	TRUE	18	5830507	0.0194091	9.12347e-07	23.7438
childhood absence epilepsy || id:ieu-b-13	ebi-a-GCST90016937	family Erysipelotrichaceae id.2149	rs8003149	C	T	C	T	0.0538798	0.0013523	NA	0.27638	FALSE	FALSE	FALSE	0.0017159	0.43	TRUE	14	56156504	0.0116888	4.08479e-06	21.2477
childhood absence epilepsy || id:ieu-b-13	ebi-a-GCST90016938	family Family XI id.1936	rs10759623	C	T	C	T	-0.162115	-0.00431525	NA	0.183108	FALSE	FALSE	FALSE	0.0019871	0.0299999	TRUE	9	115821485	0.032151	5.78309e-07	25.4248
childhood absence epilepsy || id:ieu-b-13	ebi-a-GCST90016938	family Family XI id.1936	rs11547158	A	G	A	G	-0.177599	-0.000404	NA	0.129346	FALSE	FALSE	FALSE	0.00231003	0.86	TRUE	7	148921732	0.0372795	2.70222e-06	22.6956
childhood absence epilepsy || id:ieu-b-13	ebi-a-GCST90016938	family Family XI id.1936	rs17379710	T	C	T	C	-0.116383	0.00202803	NA	0.442249	FALSE	FALSE	FALSE	0.001556	0.19	TRUE	11	35334668	0.0252125	3.97109e-06	21.3082
childhood absence epilepsy || id:ieu-b-13	ebi-a-GCST90016938	family Family XI id.1936	rs2155352	A	G	A	G	-0.150538	-0.0013544	NA	0.217964	FALSE	FALSE	FALSE	0.0018731	0.47	TRUE	11	95357209	0.0302319	6.63437e-07	24.7948
childhood absence epilepsy || id:ieu-b-13	ebi-a-GCST90016938	family Family XI id.1936	rs2156611	T	C	T	C	-0.112486	-0.0020371	NA	0.484067	FALSE	FALSE	FALSE	0.00154755	0.19	TRUE	18	43345864	0.0251099	9.42671e-06	20.0681
childhood absence epilepsy || id:ieu-b-13	ebi-a-GCST90016938	family Family XI id.1936	rs3733511	A	G	A	G	0.128253	0.00103759	NA	0.296782	FALSE	FALSE	FALSE	0.00167767	0.54	TRUE	4	119955787	0.0274718	3.38556e-06	21.7952
childhood absence epilepsy || id:ieu-b-13	ebi-a-GCST90016939	family Family XIII id.1957	rs482905	G	T	G	T	0.0596528	-0.00314886	NA	0.250392	FALSE	FALSE	FALSE	0.00176686	0.0749998	TRUE	1	166557202	0.012717	3.72349e-06	22.0035
childhood absence epilepsy || id:ieu-b-13	ebi-a-GCST90016939	family Family XIII id.1957	rs6797051	C	T	C	T	-0.0805985	0.00103736	NA	0.121085	FALSE	FALSE	FALSE	0.00236984	0.66	TRUE	3	88995218	0.0171364	4.89283e-06	22.1215
childhood absence epilepsy || id:ieu-b-13	ebi-a-GCST90016939	family Family XIII id.1957	rs7514702	T	C	T	C	-0.0663236	-0.0024401	NA	0.181171	FALSE	FALSE	FALSE	0.00200103	0.22	TRUE	1	186914023	0.0141626	3.91643e-06	21.9306
childhood absence epilepsy || id:ieu-b-13	ebi-a-GCST90016940	family Lachnospiraceae id.1987	rs11139361	C	T	C	T	-0.0494463	0.00151419	NA	0.64286	FALSE	FALSE	FALSE	0.00160127	0.34	TRUE	9	72179847	0.0110503	4.26265e-06	20.0226
childhood absence epilepsy || id:ieu-b-13	ebi-a-GCST90016940	family Lachnospiraceae id.1987	rs11841382	G	T	G	T	-0.0718128	-0.00232615	NA	0.0792057	FALSE	FALSE	FALSE	0.0028459	0.41	TRUE	13	38004672	0.017462	9.57767e-06	16.9128
childhood absence epilepsy || id:ieu-b-13	ebi-a-GCST90016940	family Lachnospiraceae id.1987	rs12760724	A	C	A	C	-0.0484566	0.00138643	NA	0.36442	FALSE	FALSE	FALSE	0.00158645	0.38	TRUE	1	214031969	0.0107934	7.26742e-06	20.1553
childhood absence epilepsy || id:ieu-b-13	ebi-a-GCST90016940	family Lachnospiraceae id.1987	rs2159863	A	G	A	G	-0.0585831	-0.00319548	NA	0.207748	FALSE	FALSE	FALSE	0.00191806	0.0959997	TRUE	4	10245354	0.0128742	3.69556e-06	20.7064
childhood absence epilepsy || id:ieu-b-13	ebi-a-GCST90016940	family Lachnospiraceae id.1987	rs2910921	C	T	C	T	-0.160302	-0.00436291	NA	0.95583	FALSE	FALSE	FALSE	0.00374455	0.24	TRUE	5	32348593	0.035832	8.41977e-06	20.0141
childhood absence epilepsy || id:ieu-b-13	ebi-a-GCST90016940	family Lachnospiraceae id.1987	rs7359994	C	T	C	T	0.0503142	0.000943077	NA	0.64758	FALSE	FALSE	FALSE	0.00159661	0.55	TRUE	19	29408858	0.0112482	5.35895e-06	20.0085
childhood absence epilepsy || id:ieu-b-13	ebi-a-GCST90016941	family Lactobacillaceae id.1836	rs768253	T	G	T	G	-0.0792344	-0.000731571	NA	0.393708	FALSE	FALSE	FALSE	0.00157724	0.64	TRUE	8	69010103	0.0170604	3.60761e-06	21.5699
childhood absence epilepsy || id:ieu-b-13	ebi-a-GCST90016941	family Lactobacillaceae id.1836	rs921925	A	C	A	C	0.0999419	-0.00232059	NA	0.216728	FALSE	FALSE	FALSE	0.00188955	0.22	TRUE	19	6928017	0.0201687	5.77192e-07	24.555
childhood absence epilepsy || id:ieu-b-13	ebi-a-GCST90016942	family Methanobacteriaceae id.121	rs10202904	G	T	G	T	0.121754	-0.00339672	NA	0.577454	FALSE	FALSE	FALSE	0.00155454	0.0290001	TRUE	2	125440268	0.0235357	3.01432e-07	26.7616
childhood absence epilepsy || id:ieu-b-13	ebi-a-GCST90016942	family Methanobacteriaceae id.121	rs56131665	G	A	G	A	0.178661	-0.000128433	NA	0.0926134	FALSE	FALSE	FALSE	0.00270231	0.96	TRUE	5	178160975	0.039298	6.17988e-06	20.669
childhood absence epilepsy || id:ieu-b-13	ebi-a-GCST90016942	family Methanobacteriaceae id.121	rs6776814	T	C	T	C	-0.199566	-0.0029106	NA	0.0905988	FALSE	FALSE	FALSE	0.00268246	0.28	TRUE	3	15053083	0.0411825	1.63061e-06	23.4827
childhood absence epilepsy || id:ieu-b-13	ebi-a-GCST90016942	family Methanobacteriaceae id.121	rs73068003	G	T	G	T	-0.15814	-0.00189399	NA	0.123415	FALSE	FALSE	FALSE	0.00237931	0.43	TRUE	7	10773932	0.0351803	8.44578e-06	20.2062
childhood absence epilepsy || id:ieu-b-13	ebi-a-GCST90016942	family Methanobacteriaceae id.121	rs73457410	A	G	A	G	0.21534	-0.000257506	NA	0.0728292	FALSE	FALSE	FALSE	0.00298052	0.93	TRUE	13	41956181	0.0436695	1.40854e-06	24.316
childhood absence epilepsy || id:ieu-b-13	ebi-a-GCST90016942	family Methanobacteriaceae id.121	rs75208022	C	T	C	T	-0.227245	8.18229e-05	NA	0.0713594	FALSE	FALSE	FALSE	0.00297578	0.98	TRUE	12	21338861	0.048763	5.92107e-06	21.7174
childhood absence epilepsy || id:ieu-b-13	ebi-a-GCST90016942	family Methanobacteriaceae id.121	rs894996	C	A	C	A	0.216999	-0.00103535	NA	0.0771305	FALSE	FALSE	FALSE	0.00288544	0.719999	TRUE	4	104418307	0.0449076	1.87556e-06	23.3494
childhood absence epilepsy || id:ieu-b-13	ebi-a-GCST90016943	family Oxalobacteraceae id.2966	rs1569853	T	C	T	C	-0.140043	-0.00146522	NA	0.148186	FALSE	FALSE	FALSE	0.0021773	0.5	TRUE	6	38550301	0.0281704	7.45178e-07	24.7136
childhood absence epilepsy || id:ieu-b-13	ebi-a-GCST90016943	family Oxalobacteraceae id.2966	rs17138946	G	T	G	T	-0.189444	0.00403226	NA	0.0544536	FALSE	FALSE	FALSE	0.00338213	0.23	TRUE	16	5984558	0.0430248	8.09003e-06	19.3876
childhood absence epilepsy || id:ieu-b-13	ebi-a-GCST90016943	family Oxalobacteraceae id.2966	rs36057338	G	T	G	T	0.181604	-0.00326485	NA	0.0677536	FALSE	FALSE	FALSE	0.00307354	0.29	TRUE	4	189935314	0.0398742	6.25792e-06	20.7428
childhood absence epilepsy || id:ieu-b-13	ebi-a-GCST90016943	family Oxalobacteraceae id.2966	rs4428215	G	A	G	A	0.12561	0.00175691	NA	0.232229	FALSE	FALSE	FALSE	0.00182412	0.34	TRUE	3	171947435	0.0230053	4.87933e-08	29.8121
childhood absence epilepsy || id:ieu-b-13	ebi-a-GCST90016943	family Oxalobacteraceae id.2966	rs561239	A	G	A	G	0.105525	-0.000981915	NA	0.244995	FALSE	FALSE	FALSE	0.00181357	0.59	TRUE	12	18793583	0.0236769	7.19383e-06	19.8637
childhood absence epilepsy || id:ieu-b-13	ebi-a-GCST90016943	family Oxalobacteraceae id.2966	rs736744	T	C	T	C	-0.105642	-0.000641078	NA	0.597195	FALSE	FALSE	FALSE	0.00158351	0.69	TRUE	9	87514407	0.0200648	1.49417e-07	27.7207
childhood absence epilepsy || id:ieu-b-13	ebi-a-GCST90016943	family Oxalobacteraceae id.2966	rs80330081	A	C	A	C	-0.18756	-0.00299441	NA	0.061133	FALSE	FALSE	FALSE	0.00319432	0.35	TRUE	4	67427392	0.0423688	6.64003e-06	19.5969
childhood absence epilepsy || id:ieu-b-13	ebi-a-GCST90016944	family Pasteurellaceae id.3689	rs10965428	C	A	C	A	-0.119902	0.00195453	NA	0.0838743	FALSE	FALSE	FALSE	0.00277353	0.48	TRUE	9	22718481	0.0258219	4.29151e-06	21.5614
childhood absence epilepsy || id:ieu-b-13	ebi-a-GCST90016944	family Pasteurellaceae id.3689	rs12050685	A	G	A	G	-0.0670948	3.86515e-05	NA	0.386582	FALSE	FALSE	FALSE	0.00157555	0.98	TRUE	15	73477482	0.015239	9.18523e-06	19.385
childhood absence epilepsy || id:ieu-b-13	ebi-a-GCST90016944	family Pasteurellaceae id.3689	rs9895850	T	C	T	C	-0.176406	-0.00697558	NA	0.0444997	FALSE	FALSE	FALSE	0.00371074	0.0599998	TRUE	17	64535013	0.041017	9.0826e-06	18.4969
childhood absence epilepsy || id:ieu-b-13	ebi-a-GCST90016945	family Peptococcaceae id.2024	rs12144792	C	T	C	T	0.064399	0.000610781	NA	0.387046	FALSE	FALSE	FALSE	0.00159608	0.7	TRUE	1	27418225	0.0141246	5.82237e-06	20.7877
childhood absence epilepsy || id:ieu-b-13	ebi-a-GCST90016945	family Peptococcaceae id.2024	rs75430375	C	T	C	T	-0.147941	0.000182416	NA	0.0610498	FALSE	FALSE	FALSE	0.00321799	0.95	TRUE	5	89252884	0.0317498	3.40847e-06	21.7118
childhood absence epilepsy || id:ieu-b-13	ebi-a-GCST90016946	family Peptostreptococcaceae id.2042	rs117020988	C	T	C	T	0.182411	0.00130015	NA	0.049122	FALSE	FALSE	FALSE	0.00358223	0.719999	TRUE	7	46710977	0.0372126	1.02795e-06	24.0282
childhood absence epilepsy || id:ieu-b-13	ebi-a-GCST90016946	family Peptostreptococcaceae id.2042	rs12986312	T	G	T	G	0.0571818	0.000462731	NA	0.300378	FALSE	FALSE	FALSE	0.00169069	0.780001	TRUE	19	17414138	0.0125947	5.76713e-06	20.6129
childhood absence epilepsy || id:ieu-b-13	ebi-a-GCST90016946	family Peptostreptococcaceae id.2042	rs4692811	C	T	C	T	0.0642075	-0.000402401	NA	0.266344	FALSE	FALSE	FALSE	0.00172852	0.82	TRUE	4	171180190	0.0126913	4.21124e-07	25.5952
childhood absence epilepsy || id:ieu-b-13	ebi-a-GCST90016946	family Peptostreptococcaceae id.2042	rs61841503	G	A	G	A	0.0919658	-0.0026802	NA	0.156777	FALSE	FALSE	FALSE	0.0021218	0.21	TRUE	10	17019559	0.0161331	9.80122e-09	32.495
childhood absence epilepsy || id:ieu-b-13	ebi-a-GCST90016946	family Peptostreptococcaceae id.2042	rs6721459	G	A	G	A	-0.0509823	-0.00307728	NA	0.465056	FALSE	FALSE	FALSE	0.00153247	0.0449997	TRUE	2	67852836	0.0111975	5.07762e-06	20.7299
childhood absence epilepsy || id:ieu-b-13	ebi-a-GCST90016946	family Peptostreptococcaceae id.2042	rs9573937	A	G	A	G	-0.0693637	0.00158954	NA	0.195113	FALSE	FALSE	FALSE	0.00192805	0.41	TRUE	13	77351196	0.0142907	1.70589e-06	23.559
childhood absence epilepsy || id:ieu-b-13	ebi-a-GCST90016947	family Porphyromonadaceae id.943	rs17065783	A	G	A	G	-0.059133	0.000445376	NA	0.235239	FALSE	FALSE	FALSE	0.00180963	0.81	TRUE	3	62035586	0.0122235	1.79349e-06	23.4028
childhood absence epilepsy || id:ieu-b-13	ebi-a-GCST90016947	family Porphyromonadaceae id.943	rs1980561	A	G	A	G	-0.0485289	-0.000810873	NA	0.372645	FALSE	FALSE	FALSE	0.00157642	0.61	TRUE	14	63386516	0.0109284	8.9454e-06	19.7191
childhood absence epilepsy || id:ieu-b-13	ebi-a-GCST90016947	family Porphyromonadaceae id.943	rs35233670	T	C	T	C	-0.0473576	-0.00275216	NA	0.44772	FALSE	FALSE	FALSE	0.00155356	0.0759994	TRUE	17	63750903	0.010602	7.90988e-06	19.9528
childhood absence epilepsy || id:ieu-b-13	ebi-a-GCST90016947	family Porphyromonadaceae id.943	rs35961441	A	C	A	C	0.0915257	0.000623254	NA	0.07671	FALSE	FALSE	FALSE	0.00290819	0.83	TRUE	1	240929774	0.0207306	8.37394e-06	19.4923
childhood absence epilepsy || id:ieu-b-13	ebi-a-GCST90016947	family Porphyromonadaceae id.943	rs6953849	A	G	A	G	0.0718149	1.19473e-05	NA	0.146248	FALSE	FALSE	FALSE	0.00216194	1	TRUE	7	69251692	0.0150724	2.44478e-06	22.702
childhood absence epilepsy || id:ieu-b-13	ebi-a-GCST90016947	family Porphyromonadaceae id.943	rs864093	A	C	A	C	-0.0527939	0.00076888	NA	0.270501	FALSE	FALSE	FALSE	0.00172981	0.66	TRUE	4	149825977	0.0117499	9.59798e-06	20.1883
childhood absence epilepsy || id:ieu-b-13	ebi-a-GCST90016948	family Prevotellaceae id.960	rs12118202	T	C	T	C	-0.0751986	0.00164287	NA	0.203946	FALSE	FALSE	FALSE	0.00190624	0.39	TRUE	1	210681370	0.0147265	5.5423e-07	26.0748
childhood absence epilepsy || id:ieu-b-13	ebi-a-GCST90016948	family Prevotellaceae id.960	rs2206482	T	G	T	G	-0.0569105	0.00241133	NA	0.43672	FALSE	FALSE	FALSE	0.00156971	0.12	TRUE	20	9771109	0.0117486	1.30377e-06	23.4646
childhood absence epilepsy || id:ieu-b-13	ebi-a-GCST90016948	family Prevotellaceae id.960	rs3758087	C	T	C	T	-0.0564199	-0.00231573	NA	0.677603	FALSE	FALSE	FALSE	0.00164244	0.16	TRUE	8	23714609	0.0124655	8.60578e-06	20.4854
childhood absence epilepsy || id:ieu-b-13	ebi-a-GCST90016948	family Prevotellaceae id.960	rs3860225	A	G	A	G	0.083936	0.00237308	NA	0.137128	FALSE	FALSE	FALSE	0.00223189	0.29	TRUE	1	111161677	0.0167936	5.4968e-07	24.9809
childhood absence epilepsy || id:ieu-b-13	ebi-a-GCST90016948	family Prevotellaceae id.960	rs4493272	T	C	T	C	-0.0604992	-0.00266053	NA	0.418851	FALSE	FALSE	FALSE	0.0015679	0.0899995	TRUE	2	118910912	0.0118027	3.02315e-07	26.2746
childhood absence epilepsy || id:ieu-b-13	ebi-a-GCST90016948	family Prevotellaceae id.960	rs4685827	T	C	T	C	-0.0679529	-0.00117801	NA	0.20298	FALSE	FALSE	FALSE	0.00191183	0.54	TRUE	3	4864877	0.0145407	2.77192e-06	21.8396
childhood absence epilepsy || id:ieu-b-13	ebi-a-GCST90016948	family Prevotellaceae id.960	rs7252711	G	A	G	A	0.0740876	-0.00231582	NA	0.869825	FALSE	FALSE	FALSE	0.00227117	0.31	TRUE	19	17460999	0.0161926	5.56583e-06	20.9343
childhood absence epilepsy || id:ieu-b-13	ebi-a-GCST90016948	family Prevotellaceae id.960	rs7975087	C	A	C	A	-0.0601448	0.00150151	NA	0.2364	FALSE	FALSE	FALSE	0.00181069	0.41	TRUE	12	21404832	0.0135454	7.59451e-06	19.7157
childhood absence epilepsy || id:ieu-b-13	ebi-a-GCST90016948	family Prevotellaceae id.960	rs9586501	G	A	G	A	0.0592681	-0.000427887	NA	0.305793	FALSE	FALSE	FALSE	0.00167742	0.8	TRUE	13	105075823	0.0127329	2.58988e-06	21.6664
childhood absence epilepsy || id:ieu-b-13	ebi-a-GCST90016948	family Prevotellaceae id.960	rs9958960	G	A	G	A	-0.0914807	-0.00220196	NA	0.141591	FALSE	FALSE	FALSE	0.00220878	0.32	TRUE	18	63018983	0.0173611	1.06324e-07	27.7654
childhood absence epilepsy || id:ieu-b-13	ebi-a-GCST90016949	family Rhodospirillaceae id.2717	rs1035406	G	A	G	A	-0.11354	-0.00255429	NA	0.109231	FALSE	FALSE	FALSE	0.00246904	0.3	TRUE	5	119372737	0.0250863	5.84454e-06	20.4845
childhood absence epilepsy || id:ieu-b-13	ebi-a-GCST90016949	family Rhodospirillaceae id.2717	rs11591293	G	T	G	T	0.0743184	-0.0022458	NA	0.388958	FALSE	FALSE	FALSE	0.0015739	0.15	TRUE	10	113419797	0.0158724	2.67147e-06	21.9234
childhood absence epilepsy || id:ieu-b-13	ebi-a-GCST90016949	family Rhodospirillaceae id.2717	rs1549633	A	C	A	C	0.0999312	-1.46165e-05	NA	0.138196	FALSE	FALSE	FALSE	0.00225861	0.99	TRUE	5	27945645	0.0218634	4.70392e-06	20.8914
childhood absence epilepsy || id:ieu-b-13	ebi-a-GCST90016949	family Rhodospirillaceae id.2717	rs1923415	A	G	A	G	-0.0999238	0.000742105	NA	0.121338	FALSE	FALSE	FALSE	0.00236225	0.75	TRUE	6	89268715	0.0227326	9.63696e-06	19.3214
childhood absence epilepsy || id:ieu-b-13	ebi-a-GCST90016949	family Rhodospirillaceae id.2717	rs3754624	C	T	C	T	0.0971389	0.000962808	NA	0.176233	FALSE	FALSE	FALSE	0.00200969	0.630001	TRUE	2	225633812	0.0200064	1.71479e-06	23.5748
childhood absence epilepsy || id:ieu-b-13	ebi-a-GCST90016949	family Rhodospirillaceae id.2717	rs4278423	T	C	T	C	0.107529	-0.00164856	NA	0.1146	FALSE	FALSE	FALSE	0.00241111	0.49	TRUE	10	2670553	0.0235725	3.12018e-06	20.8085
childhood absence epilepsy || id:ieu-b-13	ebi-a-GCST90016949	family Rhodospirillaceae id.2717	rs55876211	C	T	C	T	-0.0911851	0.00160113	NA	0.18636	FALSE	FALSE	FALSE	0.00196547	0.42	TRUE	3	84471266	0.0196395	2.86682e-06	21.5569
childhood absence epilepsy || id:ieu-b-13	ebi-a-GCST90016949	family Rhodospirillaceae id.2717	rs6679026	T	C	T	C	0.111984	0.00286797	NA	0.103823	FALSE	FALSE	FALSE	0.00251652	0.25	TRUE	1	78619512	0.0251088	9.94672e-06	19.8912
childhood absence epilepsy || id:ieu-b-13	ebi-a-GCST90016949	family Rhodospirillaceae id.2717	rs7001029	C	T	C	T	0.117366	0.000222267	NA	0.0964708	FALSE	FALSE	FALSE	0.00261046	0.93	TRUE	8	131958403	0.0261324	5.34749e-06	20.1709
childhood absence epilepsy || id:ieu-b-13	ebi-a-GCST90016949	family Rhodospirillaceae id.2717	rs72714493	A	G	A	G	0.0816858	-0.000589625	NA	0.241959	FALSE	FALSE	FALSE	0.00181379	0.75	TRUE	1	92206218	0.0180791	7.3492e-06	20.4145
childhood absence epilepsy || id:ieu-b-13	ebi-a-GCST90016949	family Rhodospirillaceae id.2717	rs76784716	A	G	A	G	0.136049	-1.42121e-05	NA	0.071977	FALSE	FALSE	FALSE	0.00297312	1	TRUE	2	169033340	0.0285767	1.48988e-06	22.6656
childhood absence epilepsy || id:ieu-b-13	ebi-a-GCST90016949	family Rhodospirillaceae id.2717	rs9813022	A	G	A	G	-0.0842444	-0.000355958	NA	0.312305	FALSE	FALSE	FALSE	0.00165944	0.83	TRUE	3	13726736	0.0163583	2.53122e-07	26.522
childhood absence epilepsy || id:ieu-b-13	ebi-a-GCST90016950	family Rikenellaceae id.967	rs10217435	C	T	C	T	-0.0883756	0.00221	NA	0.0776201	FALSE	FALSE	FALSE	0.00286176	0.44	TRUE	9	86052655	0.0197506	6.50759e-06	20.0218
childhood absence epilepsy || id:ieu-b-13	ebi-a-GCST90016950	family Rikenellaceae id.967	rs2833282	G	A	G	A	0.0711137	0.00114602	NA	0.120576	FALSE	FALSE	FALSE	0.00237437	0.630001	TRUE	21	32496710	0.0156966	4.31102e-06	20.5256
childhood absence epilepsy || id:ieu-b-13	ebi-a-GCST90016950	family Rikenellaceae id.967	rs35909684	A	C	A	C	-0.0850181	1.41689e-05	NA	0.0883486	FALSE	FALSE	FALSE	0.00271883	1	TRUE	8	144441740	0.0191539	7.09823e-06	19.7019
childhood absence epilepsy || id:ieu-b-13	ebi-a-GCST90016950	family Rikenellaceae id.967	rs4264350	T	C	T	C	-0.0526393	0.000333889	NA	0.397284	FALSE	FALSE	FALSE	0.00156926	0.83	TRUE	15	71658642	0.0108555	1.34831e-06	23.5137
childhood absence epilepsy || id:ieu-b-13	ebi-a-GCST90016950	family Rikenellaceae id.967	rs62532512	A	C	A	C	0.0504257	0.0023965	NA	0.547309	FALSE	FALSE	FALSE	0.00157149	0.13	TRUE	9	14158854	0.0107399	2.76427e-06	22.0447
childhood absence epilepsy || id:ieu-b-13	ebi-a-GCST90016950	family Rikenellaceae id.967	rs67705352	T	G	T	G	-0.0549688	-0.000230252	NA	0.369467	FALSE	FALSE	FALSE	0.00159892	0.89	TRUE	1	19790706	0.0110534	6.57552e-07	24.7309
childhood absence epilepsy || id:ieu-b-13	ebi-a-GCST90016950	family Rikenellaceae id.967	rs77885767	C	T	C	T	-0.156209	0.00255609	NA	0.04698	FALSE	FALSE	FALSE	0.00366862	0.49	TRUE	14	21548634	0.0336482	2.84695e-06	21.552
childhood absence epilepsy || id:ieu-b-13	ebi-a-GCST90016950	family Rikenellaceae id.967	rs9389714	C	T	C	T	-0.0636841	0.00439399	NA	0.148974	FALSE	FALSE	FALSE	0.00214505	0.0409996	TRUE	6	100244667	0.0143416	8.79063e-06	19.7182
childhood absence epilepsy || id:ieu-b-13	ebi-a-GCST90016950	family Rikenellaceae id.967	rs9603208	G	T	G	T	0.0821173	-0.00382601	NA	0.107469	FALSE	FALSE	FALSE	0.00248297	0.12	TRUE	13	38044689	0.0159596	1.91801e-07	26.4744
childhood absence epilepsy || id:ieu-b-13	ebi-a-GCST90016951	family Ruminococcaceae id.2050	rs10093275	T	C	T	C	-0.0534595	0.00178387	NA	0.713588	FALSE	FALSE	FALSE	0.00169843	0.29	TRUE	8	69732887	0.011677	5.35229e-06	20.9598
childhood absence epilepsy || id:ieu-b-13	ebi-a-GCST90016951	family Ruminococcaceae id.2050	rs10166469	C	T	C	T	0.053336	0.00200221	NA	0.740748	FALSE	FALSE	FALSE	0.00175202	0.25	TRUE	2	29829167	0.0120209	8.52158e-06	19.6864
childhood absence epilepsy || id:ieu-b-13	ebi-a-GCST90016951	family Ruminococcaceae id.2050	rs1158100	G	A	G	A	0.0490539	-0.000284273	NA	0.626003	FALSE	FALSE	FALSE	0.00159101	0.86	TRUE	8	4555684	0.0109865	8.60855e-06	19.9356
childhood absence epilepsy || id:ieu-b-13	ebi-a-GCST90016951	family Ruminococcaceae id.2050	rs17376049	T	C	T	C	0.0848534	-0.00279015	NA	0.10597	FALSE	FALSE	FALSE	0.00248988	0.26	TRUE	1	61425267	0.0172114	7.29625e-07	24.3056
childhood absence epilepsy || id:ieu-b-13	ebi-a-GCST90016951	family Ruminococcaceae id.2050	rs2113833	C	T	C	T	-0.169146	0.00190619	NA	0.963353	FALSE	FALSE	FALSE	0.00407352	0.64	TRUE	2	218216801	0.0355009	1.14464e-06	22.701
childhood absence epilepsy || id:ieu-b-13	ebi-a-GCST90016952	family Streptococcaceae id.1850	rs10028567	C	T	C	T	-0.0934027	0.00135616	NA	0.0883323	FALSE	FALSE	FALSE	0.00270596	0.62	TRUE	4	53657577	0.0190343	3.72495e-06	24.0794
childhood absence epilepsy || id:ieu-b-13	ebi-a-GCST90016952	family Streptococcaceae id.1850	rs11110281	T	C	T	C	-0.130554	0.00244053	NA	0.0614274	FALSE	FALSE	FALSE	0.00318908	0.44	TRUE	12	100584014	0.0225943	1.40136e-08	33.3874
childhood absence epilepsy || id:ieu-b-13	ebi-a-GCST90016952	family Streptococcaceae id.1850	rs4968759	A	G	A	G	-0.0544035	0.000952366	NA	0.440218	FALSE	FALSE	FALSE	0.00155312	0.54	TRUE	17	61298020	0.0111271	8.91887e-07	23.9051
childhood absence epilepsy || id:ieu-b-13	ebi-a-GCST90016952	family Streptococcaceae id.1850	rs57646748	G	A	G	A	-0.088021	-0.00619268	NA	0.0692951	FALSE	FALSE	FALSE	0.00304249	0.0420001	TRUE	4	37452858	0.019876	7.88352e-06	19.6117
childhood absence epilepsy || id:ieu-b-13	ebi-a-GCST90016952	family Streptococcaceae id.1850	rs6806351	T	C	T	C	-0.0619209	-0.000534061	NA	0.226904	FALSE	FALSE	FALSE	0.00185778	0.77	TRUE	3	132058723	0.0135744	6.93793e-06	20.8081
childhood absence epilepsy || id:ieu-b-13	ebi-a-GCST90016952	family Streptococcaceae id.1850	rs77968078	G	A	G	A	-0.0993013	0.000144948	NA	0.0610457	FALSE	FALSE	FALSE	0.0031889	0.96	TRUE	1	240441766	0.0224788	7.93341e-06	19.5148
childhood absence epilepsy || id:ieu-b-13	ebi-a-GCST90016952	family Streptococcaceae id.1850	rs7916711	A	G	A	G	0.0959639	-0.00545446	NA	0.0625902	FALSE	FALSE	FALSE	0.00315723	0.0840001	TRUE	10	28588269	0.021545	6.32732e-06	19.8391
childhood absence epilepsy || id:ieu-b-13	ebi-a-GCST90016956	family Veillonellaceae id.2172	rs11700976	C	A	C	A	0.0503337	0.000810552	NA	0.485341	FALSE	FALSE	FALSE	0.00156335	0.6	TRUE	21	35576123	0.0113763	9.2538e-06	19.5756
childhood absence epilepsy || id:ieu-b-13	ebi-a-GCST90016956	family Veillonellaceae id.2172	rs12741784	C	T	C	T	-0.0621452	-0.000946495	NA	0.36509	FALSE	FALSE	FALSE	0.00159245	0.55	TRUE	1	50088819	0.0119266	1.28493e-07	27.1508
childhood absence epilepsy || id:ieu-b-13	ebi-a-GCST90016956	family Veillonellaceae id.2172	rs1442060	A	G	A	G	0.0514024	0.00267962	NA	0.49473	FALSE	FALSE	FALSE	0.00156744	0.0870001	TRUE	4	46366067	0.0112125	4.50671e-06	21.0166
childhood absence epilepsy || id:ieu-b-13	ebi-a-GCST90016956	family Veillonellaceae id.2172	rs2175069	G	A	G	A	0.0526752	0.00145053	NA	0.617733	FALSE	FALSE	FALSE	0.00158642	0.36	TRUE	4	23317124	0.0114886	4.63554e-06	21.0222
childhood absence epilepsy || id:ieu-b-13	ebi-a-GCST90016956	family Veillonellaceae id.2172	rs2561116	T	G	T	G	-0.083617	-0.00166688	NA	0.0976438	FALSE	FALSE	FALSE	0.00259797	0.52	TRUE	5	38348199	0.0187159	7.88515e-06	19.9603
childhood absence epilepsy || id:ieu-b-13	ebi-a-GCST90016956	family Veillonellaceae id.2172	rs2585520	G	T	G	T	-0.0904972	-0.00664847	NA	0.0858823	FALSE	FALSE	FALSE	0.0027392	0.015	TRUE	13	78785141	0.0200428	5.26926e-06	20.387
childhood absence epilepsy || id:ieu-b-13	ebi-a-GCST90016956	family Veillonellaceae id.2172	rs4263802	A	G	A	G	-0.050942	-0.00270057	NA	0.602892	FALSE	FALSE	FALSE	0.00157057	0.0860003	TRUE	8	138319508	0.0114921	7.45006e-06	19.6496
childhood absence epilepsy || id:ieu-b-13	ebi-a-GCST90016956	family Veillonellaceae id.2172	rs4461038	G	A	G	A	0.0554965	0.0016414	NA	0.651467	FALSE	FALSE	FALSE	0.00160421	0.31	TRUE	15	78546996	0.0119467	3.73474e-06	21.5792
childhood absence epilepsy || id:ieu-b-13	ebi-a-GCST90016956	family Veillonellaceae id.2172	rs4797169	T	C	T	C	0.0587799	0.000360242	NA	0.24433	FALSE	FALSE	FALSE	0.0017899	0.84	TRUE	18	462180	0.0128297	4.49345e-06	20.9906
childhood absence epilepsy || id:ieu-b-13	ebi-a-GCST90016956	family Veillonellaceae id.2172	rs6909981	C	T	C	T	-0.0638696	-0.00212422	NA	0.204174	FALSE	FALSE	FALSE	0.00191881	0.27	TRUE	6	75534152	0.0141765	5.47621e-06	20.2979
childhood absence epilepsy || id:ieu-b-13	ebi-a-GCST90016956	family Veillonellaceae id.2172	rs9345168	A	C	A	C	-0.0509102	-0.00169101	NA	0.508397	FALSE	FALSE	FALSE	0.00153796	0.27	TRUE	6	92380922	0.0113253	8.48887e-06	20.2074
childhood absence epilepsy || id:ieu-b-13	ebi-a-GCST90016957	family Verrucomicrobiaceae id.4036	rs117107102	A	G	A	G	0.204683	0.00027616	NA	0.0324577	FALSE	FALSE	FALSE	0.00438483	0.95	TRUE	18	49473635	0.0431572	2.91823e-06	22.4935
childhood absence epilepsy || id:ieu-b-13	ebi-a-GCST90016957	family Verrucomicrobiaceae id.4036	rs11729256	T	C	T	C	0.0749798	0.00133243	NA	0.24506	FALSE	FALSE	FALSE	0.00178557	0.46	TRUE	4	95027272	0.0150177	6.73085e-07	24.9277
childhood absence epilepsy || id:ieu-b-13	ebi-a-GCST90016957	family Verrucomicrobiaceae id.4036	rs12908520	G	A	G	A	0.0619104	0.00237686	NA	0.442542	FALSE	FALSE	FALSE	0.0015538	0.13	TRUE	15	97570657	0.0130946	2.15139e-06	22.3534
childhood absence epilepsy || id:ieu-b-13	ebi-a-GCST90016957	family Verrucomicrobiaceae id.4036	rs4936098	G	A	G	A	-0.0648691	0.00092994	NA	0.635886	FALSE	FALSE	FALSE	0.00162725	0.57	TRUE	11	130280667	0.0135928	1.1293e-06	22.775
childhood absence epilepsy || id:ieu-b-13	ebi-a-GCST90016957	family Verrucomicrobiaceae id.4036	rs61779207	G	A	G	A	-0.0758811	-0.000978528	NA	0.184396	FALSE	FALSE	FALSE	0.00199653	0.62	TRUE	1	41074472	0.0167762	6.63025e-06	20.4588
childhood absence epilepsy || id:ieu-b-13	ebi-a-GCST90016957	family Verrucomicrobiaceae id.4036	rs74542928	T	C	T	C	0.112124	0.000439203	NA	0.0949238	FALSE	FALSE	FALSE	0.00262694	0.87	TRUE	4	100544188	0.0236422	1.64611e-06	22.4917
childhood absence epilepsy || id:ieu-b-13	ebi-a-GCST90016957	family Verrucomicrobiaceae id.4036	rs9349825	A	G	A	G	-0.0704354	-0.00239208	NA	0.267495	FALSE	FALSE	FALSE	0.00175039	0.17	TRUE	6	56341481	0.0147128	2.51287e-06	22.9188
childhood absence epilepsy || id:ieu-b-13	ebi-a-GCST90016957	family Verrucomicrobiaceae id.4036	rs941682	G	A	G	A	-0.0631526	-0.00055634	NA	0.279344	FALSE	FALSE	FALSE	0.00172307	0.75	TRUE	20	31867840	0.0143767	9.5812e-06	19.2959
childhood absence epilepsy || id:ieu-b-13	ebi-a-GCST90016958	family Victivallaceae id.2255	rs11764871	G	T	G	T	0.127099	-0.000213153	NA	0.280917	FALSE	FALSE	FALSE	0.00172151	0.9	TRUE	7	146808977	0.025656	7.4929e-07	24.5418
childhood absence epilepsy || id:ieu-b-13	ebi-a-GCST90016958	family Victivallaceae id.2255	rs2944282	T	C	T	C	-0.124197	0.0009056	NA	0.296004	FALSE	FALSE	FALSE	0.0016908	0.59	TRUE	7	57589803	0.0257026	1.56603e-06	23.349
childhood absence epilepsy || id:ieu-b-13	ebi-a-GCST90016958	family Victivallaceae id.2255	rs4396289	C	T	C	T	-0.152918	0.00138229	NA	0.164943	FALSE	FALSE	FALSE	0.00207229	0.5	TRUE	11	9316730	0.0288525	1.53784e-07	28.0899
childhood absence epilepsy || id:ieu-b-13	ebi-a-GCST90016958	family Victivallaceae id.2255	rs62570196	C	T	C	T	-0.246101	0.00147909	NA	0.0642473	FALSE	FALSE	FALSE	0.00317259	0.64	TRUE	9	111086170	0.0483077	2.69855e-07	25.9534
childhood absence epilepsy || id:ieu-b-13	ebi-a-GCST90016958	family Victivallaceae id.2255	rs6545794	A	G	A	G	-0.197786	0.00184475	NA	0.0755012	FALSE	FALSE	FALSE	0.0028857	0.52	TRUE	2	60484909	0.0410495	5.97008e-07	23.2154
childhood absence epilepsy || id:ieu-b-13	ebi-a-GCST90016958	family Victivallaceae id.2255	rs7077363	G	A	G	A	0.148942	-0.00264571	NA	0.154718	FALSE	FALSE	FALSE	0.00212106	0.21	TRUE	10	95286954	0.0318366	2.83374e-06	21.8867
childhood absence epilepsy || id:ieu-b-13	ebi-a-GCST90016958	family Victivallaceae id.2255	rs7314815	G	A	G	A	0.101088	-0.00165328	NA	0.507334	FALSE	FALSE	FALSE	0.0015333	0.28	TRUE	12	102525047	0.0225594	6.40088e-06	20.0791
childhood absence epilepsy || id:ieu-b-13	ebi-a-GCST90016959	genus Actinomyces id.423	rs34583783	G	T	G	T	0.126596	-0.00334917	NA	0.108226	FALSE	FALSE	FALSE	0.00247019	0.18	TRUE	6	67207371	0.0268461	4.48528e-06	22.2371
childhood absence epilepsy || id:ieu-b-13	ebi-a-GCST90016959	genus Actinomyces id.423	rs71315246	A	G	A	G	-0.0969809	0.00175398	NA	0.151453	FALSE	FALSE	FALSE	0.00214303	0.41	TRUE	3	101352439	0.021925	9.82969e-06	19.5656
childhood absence epilepsy || id:ieu-b-13	ebi-a-GCST90016959	genus Actinomyces id.423	rs7915461	C	T	C	T	-0.18776	-0.0028461	NA	0.940332	FALSE	FALSE	FALSE	0.00324457	0.38	TRUE	10	127532121	0.0401636	5.91984e-06	21.8545
childhood absence epilepsy || id:ieu-b-13	ebi-a-GCST90016960	genus Adlercreutzia id.812	rs11604400	C	T	C	T	-0.102524	-0.00116064	NA	0.113112	FALSE	FALSE	FALSE	0.00242545	0.630001	TRUE	11	98386085	0.0234834	9.74473e-06	19.0603
childhood absence epilepsy || id:ieu-b-13	ebi-a-GCST90016960	genus Adlercreutzia id.812	rs13231526	C	A	C	A	0.143237	-0.00325619	NA	0.0725667	FALSE	FALSE	FALSE	0.00298299	0.28	TRUE	7	48844151	0.0311654	4.8136e-06	21.1235
childhood absence epilepsy || id:ieu-b-13	ebi-a-GCST90016960	genus Adlercreutzia id.812	rs2717140	C	T	C	T	-0.119225	0.00585767	NA	0.101096	FALSE	FALSE	FALSE	0.00254339	0.021	TRUE	18	75009770	0.0251081	2.04593e-06	22.5479
childhood absence epilepsy || id:ieu-b-13	ebi-a-GCST90016960	genus Adlercreutzia id.812	rs7680684	T	C	T	C	0.083381	-7.62533e-05	NA	0.701529	FALSE	FALSE	FALSE	0.0016837	0.96	TRUE	4	171281359	0.0168901	9.769e-07	24.3708
childhood absence epilepsy || id:ieu-b-13	ebi-a-GCST90016960	genus Adlercreutzia id.812	rs9915817	C	T	C	T	-0.0749219	-0.000874912	NA	0.693939	FALSE	FALSE	FALSE	0.00167418	0.6	TRUE	17	48864179	0.016833	8.21675e-06	19.8105
childhood absence epilepsy || id:ieu-b-13	ebi-a-GCST90016965	genus Anaerofilum id.2053	rs17012738	T	G	T	G	0.0903417	-0.000363432	NA	0.437641	FALSE	FALSE	FALSE	0.00155391	0.82	TRUE	2	76698142	0.0200239	7.24169e-06	20.3554
childhood absence epilepsy || id:ieu-b-13	ebi-a-GCST90016965	genus Anaerofilum id.2053	rs17096874	C	T	C	T	-0.126337	-0.00330931	NA	0.166841	FALSE	FALSE	FALSE	0.00205977	0.11	TRUE	14	30991358	0.0268919	2.86029e-06	22.0708
childhood absence epilepsy || id:ieu-b-13	ebi-a-GCST90016965	genus Anaerofilum id.2053	rs4244069	A	G	A	G	0.146775	0.00338778	NA	0.89607	FALSE	FALSE	FALSE	0.00253263	0.18	TRUE	12	67167461	0.0326594	9.81206e-06	20.197
childhood absence epilepsy || id:ieu-b-13	ebi-a-GCST90016965	genus Anaerofilum id.2053	rs712981	A	C	A	C	0.10076	0.000775068	NA	0.396231	FALSE	FALSE	FALSE	0.00157405	0.62	TRUE	3	129686434	0.0202902	6.83109e-07	24.6606
childhood absence epilepsy || id:ieu-b-13	ebi-a-GCST90016965	genus Anaerofilum id.2053	rs816292	T	C	T	C	-0.113003	0.00159065	NA	0.272567	FALSE	FALSE	FALSE	0.00171058	0.35	TRUE	12	117811409	0.02204	2.6404e-07	26.288
childhood absence epilepsy || id:ieu-b-13	ebi-a-GCST90016965	genus Anaerofilum id.2053	rs9299345	T	C	T	C	-0.1364	-0.0040178	NA	0.119942	FALSE	FALSE	FALSE	0.00236518	0.089	TRUE	9	104339812	0.0302372	8.04304e-06	20.3491
childhood absence epilepsy || id:ieu-b-13	ebi-a-GCST90016966	genus Anaerostipes id.1991	rs2014785	T	C	T	C	0.0515687	-0.00045473	NA	0.410823	FALSE	FALSE	FALSE	0.00157284	0.77	TRUE	3	171100102	0.0112199	4.68058e-06	21.1249
childhood absence epilepsy || id:ieu-b-13	ebi-a-GCST90016966	genus Anaerostipes id.1991	rs6474958	G	A	G	A	0.0500065	0.00164401	NA	0.587979	FALSE	FALSE	FALSE	0.00156692	0.29	TRUE	9	1582701	0.0112001	6.74481e-06	19.9347
childhood absence epilepsy || id:ieu-b-13	ebi-a-GCST90016966	genus Anaerostipes id.1991	rs6854026	C	T	C	T	0.0508482	0.0015816	NA	0.479981	FALSE	FALSE	FALSE	0.00156322	0.31	TRUE	4	169690814	0.0109075	3.1958e-06	21.7321
childhood absence epilepsy || id:ieu-b-13	ebi-a-GCST90016966	genus Anaerostipes id.1991	rs7193624	T	C	T	C	-0.0750642	-0.00444574	NA	0.847109	FALSE	FALSE	FALSE	0.00212076	0.0359998	TRUE	16	77574020	0.0150723	5.35476e-07	24.8031
childhood absence epilepsy || id:ieu-b-13	ebi-a-GCST90016975	genus Butyrivibrio id.1993	rs1007475	G	T	G	T	0.118065	-0.00270364	NA	0.310146	FALSE	FALSE	FALSE	0.00164901	0.1	TRUE	6	148403405	0.0261271	7.92319e-06	20.4202
childhood absence epilepsy || id:ieu-b-13	ebi-a-GCST90016975	genus Butyrivibrio id.1993	rs17163238	G	A	G	A	0.140987	-0.000530993	NA	0.195411	FALSE	FALSE	FALSE	0.00192963	0.780001	TRUE	5	128976021	0.0309117	5.51201e-06	20.8023
childhood absence epilepsy || id:ieu-b-13	ebi-a-GCST90016975	genus Butyrivibrio id.1993	rs4537857	T	C	T	C	-0.12459	-0.000853701	NA	0.296864	FALSE	FALSE	FALSE	0.00168555	0.61	TRUE	13	27292666	0.0260992	1.80194e-06	22.7883
childhood absence epilepsy || id:ieu-b-13	ebi-a-GCST90016975	genus Butyrivibrio id.1993	rs486484	A	G	A	G	-0.108349	-6.35912e-05	NA	0.474018	FALSE	FALSE	FALSE	0.00154451	0.97	TRUE	20	811507	0.0240008	6.61089e-06	20.3797
childhood absence epilepsy || id:ieu-b-13	ebi-a-GCST90016975	genus Butyrivibrio id.1993	rs4928024	G	A	G	A	0.17471	-0.000851446	NA	0.901017	FALSE	FALSE	FALSE	0.00257929	0.74	TRUE	3	54288503	0.0389333	8.18634e-06	20.1369
childhood absence epilepsy || id:ieu-b-13	ebi-a-GCST90016975	genus Butyrivibrio id.1993	rs77356209	T	C	T	C	0.216874	0.00136441	NA	0.0594265	FALSE	FALSE	FALSE	0.00328557	0.68	TRUE	18	10267733	0.0483299	6.66423e-06	20.1365
childhood absence epilepsy || id:ieu-b-13	ebi-a-GCST90016975	genus Butyrivibrio id.1993	rs7752361	G	A	G	A	0.11923	-0.00163355	NA	0.537593	FALSE	FALSE	FALSE	0.0015368	0.29	TRUE	6	111780705	0.0239975	7.69113e-07	24.6853
childhood absence epilepsy || id:ieu-b-13	ebi-a-GCST90016975	genus Butyrivibrio id.1993	rs9349693	G	A	G	A	-0.117973	0.00117468	NA	0.68547	FALSE	FALSE	FALSE	0.00164251	0.47	TRUE	6	53939724	0.0259861	5.54958e-06	20.6102
childhood absence epilepsy || id:ieu-b-13	ebi-a-GCST90016977	genus Catenibacterium id.2153	rs12404911	C	T	C	T	0.140717	0.0012703	NA	0.187049	FALSE	FALSE	FALSE	0.00199025	0.52	TRUE	1	240118443	0.0304142	2.79892e-06	21.4062
childhood absence epilepsy || id:ieu-b-13	ebi-a-GCST90016977	genus Catenibacterium id.2153	rs212393	A	G	A	G	0.135254	0.00201659	NA	0.692908	FALSE	FALSE	FALSE	0.00167776	0.23	TRUE	6	159485742	0.0286209	3.62485e-06	22.3323
childhood absence epilepsy || id:ieu-b-13	ebi-a-GCST90016977	genus Catenibacterium id.2153	rs7742829	C	T	C	T	0.11411	-0.000103661	NA	0.402915	FALSE	FALSE	FALSE	0.00156973	0.95	TRUE	6	105089665	0.0251099	5.60725e-06	20.6518
childhood absence epilepsy || id:ieu-b-13	ebi-a-GCST90016978	genus Christensenellaceae R 7group id.11283	rs17081797	A	G	A	G	-0.0904325	0.00250707	NA	0.075286	FALSE	FALSE	FALSE	0.00293191	0.39	TRUE	18	67555560	0.0204253	3.34033e-06	19.6025
childhood absence epilepsy || id:ieu-b-13	ebi-a-GCST90016978	genus Christensenellaceae R 7group id.11283	rs62190261	A	C	A	C	0.0958394	0.00180798	NA	0.067917	FALSE	FALSE	FALSE	0.00309019	0.56	TRUE	2	230943099	0.0214723	8.74017e-06	19.9219
childhood absence epilepsy || id:ieu-b-13	ebi-a-GCST90016978	genus Christensenellaceae R 7group id.11283	rs78521377	C	T	C	T	0.124992	0.00183477	NA	0.0493787	FALSE	FALSE	FALSE	0.00353752	0.6	TRUE	10	126448374	0.0274797	5.60673e-06	20.689
childhood absence epilepsy || id:ieu-b-13	ebi-a-GCST90016978	genus Christensenellaceae R 7group id.11283	rs892686	A	G	A	G	0.0514099	0.00061611	NA	0.466206	FALSE	FALSE	FALSE	0.0015421	0.69	TRUE	9	83043376	0.011136	3.96862e-06	21.3125
childhood absence epilepsy || id:ieu-b-13	ebi-a-GCST90016979	genus Clostridium innocuum group id.14397	rs10074000	T	C	T	C	-0.102648	-0.000912482	NA	0.402212	FALSE	FALSE	FALSE	0.00162068	0.57	TRUE	5	113126539	0.0227508	6.99939e-06	20.3567
childhood absence epilepsy || id:ieu-b-13	ebi-a-GCST90016979	genus Clostridium innocuum group id.14397	rs10506058	A	G	A	G	0.0997048	-0.000125885	NA	0.406218	FALSE	FALSE	FALSE	0.00156142	0.94	TRUE	12	30268485	0.0221926	8.92442e-06	20.1844
childhood absence epilepsy || id:ieu-b-13	ebi-a-GCST90016979	genus Clostridium innocuum group id.14397	rs61267978	T	C	T	C	0.14708	0.000313849	NA	0.137703	FALSE	FALSE	FALSE	0.00222427	0.89	TRUE	18	6348227	0.0320875	5.58509e-06	21.0105
childhood absence epilepsy || id:ieu-b-13	ebi-a-GCST90016979	genus Clostridium innocuum group id.14397	rs6890185	C	T	C	T	-0.113424	0.000960007	NA	0.664499	FALSE	FALSE	FALSE	0.00162674	0.56	TRUE	5	71186626	0.0233137	1.12243e-06	23.6694
childhood absence epilepsy || id:ieu-b-13	ebi-a-GCST90016981	genus Collinsella id.815	rs10890671	C	T	C	T	0.0537401	-0.000977111	NA	0.492477	FALSE	FALSE	FALSE	0.00152736	0.52	TRUE	11	107123199	0.0118848	6.52139e-06	20.4462
childhood absence epilepsy || id:ieu-b-13	ebi-a-GCST90016981	genus Collinsella id.815	rs11597285	G	T	G	T	-0.0537947	0.000384599	NA	0.423036	FALSE	FALSE	FALSE	0.00155649	0.8	TRUE	10	8589813	0.0120548	9.37605e-06	19.914
childhood absence epilepsy || id:ieu-b-13	ebi-a-GCST90016981	genus Collinsella id.815	rs2103510	G	A	G	A	0.0786551	0.00423153	NA	0.126519	FALSE	FALSE	FALSE	0.00232272	0.0680002	TRUE	21	29355467	0.0168217	2.42477e-06	21.8632
childhood absence epilepsy || id:ieu-b-13	ebi-a-GCST90016981	genus Collinsella id.815	rs62448871	C	A	C	A	-0.0540309	0.00171737	NA	0.434568	FALSE	FALSE	FALSE	0.00157964	0.28	TRUE	7	24465024	0.0120324	6.7825e-06	20.1641
childhood absence epilepsy || id:ieu-b-13	ebi-a-GCST90016981	genus Collinsella id.815	rs9541268	C	A	C	A	0.09597	1.33165e-05	NA	0.108206	FALSE	FALSE	FALSE	0.00249957	1	TRUE	13	68610061	0.0197312	8.79427e-07	23.6572
childhood absence epilepsy || id:ieu-b-13	ebi-a-GCST90016986	genus Defluviitaleaceae UCG011 id.11287	rs2892880	G	A	G	A	0.0817755	-0.00249261	NA	0.247001	FALSE	FALSE	FALSE	0.00180267	0.17	TRUE	4	120741726	0.0181686	6.82889e-06	20.2583
childhood absence epilepsy || id:ieu-b-13	ebi-a-GCST90016986	genus Defluviitaleaceae UCG011 id.11287	rs4344384	T	G	T	G	-0.0715978	0.000135285	NA	0.511889	FALSE	FALSE	FALSE	0.00155753	0.93	TRUE	10	66407366	0.0156309	4.83237e-06	20.9813
childhood absence epilepsy || id:ieu-b-13	ebi-a-GCST90016986	genus Defluviitaleaceae UCG011 id.11287	rs9725395	A	G	A	G	-0.13834	0.00260349	NA	0.077641	FALSE	FALSE	FALSE	0.00287234	0.36	TRUE	1	85205632	0.029554	3.51925e-06	21.911
childhood absence epilepsy || id:ieu-b-13	ebi-a-GCST90016987	genus Desulfovibrio id.3173	rs13066142	G	A	G	A	0.119141	0.000382453	NA	0.0818317	FALSE	FALSE	FALSE	0.00277758	0.89	TRUE	3	67478973	0.0250891	3.78669e-06	22.5503
childhood absence epilepsy || id:ieu-b-13	ebi-a-GCST90016987	genus Desulfovibrio id.3173	rs16863365	A	G	A	G	0.109402	0.00383094	NA	0.121766	FALSE	FALSE	FALSE	0.00235963	0.1	TRUE	2	198089911	0.0226964	1.79449e-06	23.2347
childhood absence epilepsy || id:ieu-b-13	ebi-a-GCST90016987	genus Desulfovibrio id.3173	rs72647089	T	G	T	G	-0.106594	-0.0050209	NA	0.0986348	FALSE	FALSE	FALSE	0.0025633	0.05	TRUE	8	57972916	0.0239337	8.29755e-06	19.8356
childhood absence epilepsy || id:ieu-b-13	ebi-a-GCST90016988	genus Dialister id.2183	rs10138457	T	C	T	C	-0.113054	-0.00353654	NA	0.0658401	FALSE	FALSE	FALSE	0.00310052	0.25	TRUE	14	102458052	0.0261933	7.88116e-06	18.6291
childhood absence epilepsy || id:ieu-b-13	ebi-a-GCST90016988	genus Dialister id.2183	rs10938938	A	G	A	G	0.0773514	-0.000484516	NA	0.8177	FALSE	FALSE	FALSE	0.00200185	0.81	TRUE	4	23294359	0.0170915	7.37055e-06	20.4822
childhood absence epilepsy || id:ieu-b-13	ebi-a-GCST90016988	genus Dialister id.2183	rs11166701	G	A	G	A	-0.0655301	-0.00304229	NA	0.507118	FALSE	FALSE	FALSE	0.00155308	0.05	TRUE	8	138295725	0.013186	5.50744e-07	24.6976
childhood absence epilepsy || id:ieu-b-13	ebi-a-GCST90016988	genus Dialister id.2183	rs2435610	A	C	A	C	0.0647132	-0.00040511	NA	0.279433	FALSE	FALSE	FALSE	0.00175557	0.82	TRUE	7	150890034	0.0143314	5.93267e-06	20.3896
childhood absence epilepsy || id:ieu-b-13	ebi-a-GCST90016988	genus Dialister id.2183	rs4747450	C	A	C	A	0.0668509	-0.00219143	NA	0.256474	FALSE	FALSE	FALSE	0.00174982	0.21	TRUE	10	23199653	0.0147685	5.83727e-06	20.49
childhood absence epilepsy || id:ieu-b-13	ebi-a-GCST90016988	genus Dialister id.2183	rs4753063	A	G	A	G	0.0596297	-0.000785892	NA	0.550642	FALSE	FALSE	FALSE	0.00153892	0.61	TRUE	11	92267129	0.0130052	4.8568e-06	21.0228
childhood absence epilepsy || id:ieu-b-13	ebi-a-GCST90016988	genus Dialister id.2183	rs75416973	A	G	A	G	0.0727223	-0.00206153	NA	0.198976	FALSE	FALSE	FALSE	0.00194301	0.29	TRUE	1	172809633	0.016451	9.46085e-06	19.5412
childhood absence epilepsy || id:ieu-b-13	ebi-a-GCST90016988	genus Dialister id.2183	rs764177	C	A	C	A	-0.0601454	-0.00268698	NA	0.32871	FALSE	FALSE	FALSE	0.0016487	0.1	TRUE	3	45809449	0.0135366	9.60771e-06	19.7417
childhood absence epilepsy || id:ieu-b-13	ebi-a-GCST90016990	genus Eggerthella id.819	rs13070736	A	C	A	C	-0.121331	-0.00239586	NA	0.146165	FALSE	FALSE	FALSE	0.00218799	0.27	TRUE	3	20807454	0.0272024	7.61921e-06	19.8943
childhood absence epilepsy || id:ieu-b-13	ebi-a-GCST90016990	genus Eggerthella id.819	rs1784446	A	G	A	G	-0.0907728	0.00163914	NA	0.562141	FALSE	FALSE	FALSE	0.00154415	0.29	TRUE	11	102461599	0.0198096	5.2313e-06	20.9971
childhood absence epilepsy || id:ieu-b-13	ebi-a-GCST90016990	genus Eggerthella id.819	rs4985746	A	G	A	G	-0.110522	1.04437e-05	NA	0.793073	FALSE	FALSE	FALSE	0.00190031	1	TRUE	17	17098213	0.0247653	5.71465e-06	19.9164
childhood absence epilepsy || id:ieu-b-13	ebi-a-GCST90016990	genus Eggerthella id.819	rs6430926	T	C	T	C	-0.0879736	0.000837251	NA	0.50467	FALSE	FALSE	FALSE	0.00155653	0.59	TRUE	2	141337454	0.0197127	8.37124e-06	19.9165
childhood absence epilepsy || id:ieu-b-13	ebi-a-GCST90016991	genus Eisenbergiella id.11304	rs11027642	C	T	C	T	0.129006	0.00233612	NA	0.1232	FALSE	FALSE	FALSE	0.00232998	0.32	TRUE	11	24001840	0.0284844	4.9187e-06	20.5119
childhood absence epilepsy || id:ieu-b-13	ebi-a-GCST90016991	genus Eisenbergiella id.11304	rs11079158	T	C	T	C	0.100627	-0.00264715	NA	0.225	FALSE	FALSE	FALSE	0.00183787	0.15	TRUE	17	53367641	0.022546	7.34852e-06	19.92
childhood absence epilepsy || id:ieu-b-13	ebi-a-GCST90016991	genus Eisenbergiella id.11304	rs11938607	C	T	C	T	-0.0978125	-0.000568452	NA	0.75757	FALSE	FALSE	FALSE	0.0017769	0.75	TRUE	4	189060431	0.0216636	8.21826e-06	20.3858
childhood absence epilepsy || id:ieu-b-13	ebi-a-GCST90016991	genus Eisenbergiella id.11304	rs12710729	C	A	C	A	0.0893384	-0.000134034	NA	0.349322	FALSE	FALSE	FALSE	0.00162741	0.93	TRUE	2	19973210	0.0199069	9.84419e-06	20.1404
childhood absence epilepsy || id:ieu-b-13	ebi-a-GCST90016991	genus Eisenbergiella id.11304	rs13258851	A	G	A	G	0.137001	-0.000487511	NA	0.101798	FALSE	FALSE	FALSE	0.00251767	0.85	TRUE	8	55330814	0.0302124	7.7464e-06	20.5626
childhood absence epilepsy || id:ieu-b-13	ebi-a-GCST90016991	genus Eisenbergiella id.11304	rs1508033	A	C	A	C	0.091546	0.000562712	NA	0.360074	FALSE	FALSE	FALSE	0.00159938	0.719999	TRUE	15	53375201	0.0195787	3.22887e-06	21.8631
childhood absence epilepsy || id:ieu-b-13	ebi-a-GCST90016991	genus Eisenbergiella id.11304	rs1553971	T	G	T	G	0.120965	-0.000331175	NA	0.151154	FALSE	FALSE	FALSE	0.00215273	0.88	TRUE	3	111419486	0.0263054	5.26842e-06	21.1461
childhood absence epilepsy || id:ieu-b-13	ebi-a-GCST90016991	genus Eisenbergiella id.11304	rs2683098	T	C	T	C	-0.107319	-0.00259445	NA	0.787206	FALSE	FALSE	FALSE	0.00187818	0.17	TRUE	15	36178565	0.022515	2.23748e-06	22.7201
childhood absence epilepsy || id:ieu-b-13	ebi-a-GCST90016991	genus Eisenbergiella id.11304	rs3812426	A	G	A	G	-0.106447	0.00151599	NA	0.771164	FALSE	FALSE	FALSE	0.00182325	0.41	TRUE	8	50822676	0.0224159	2.71688e-06	22.5504
childhood absence epilepsy || id:ieu-b-13	ebi-a-GCST90016992	genus Enterorhabdus id.820	rs10098492	T	C	T	C	0.132323	0.00247794	NA	0.0878971	FALSE	FALSE	FALSE	0.002698	0.36	TRUE	8	113109756	0.0293688	6.40575e-06	20.3001
childhood absence epilepsy || id:ieu-b-13	ebi-a-GCST90016992	genus Enterorhabdus id.820	rs2051957	C	T	C	T	0.0843291	-0.0017435	NA	0.249175	FALSE	FALSE	FALSE	0.0017688	0.32	TRUE	7	89709883	0.0189864	8.89857e-06	19.7274
childhood absence epilepsy || id:ieu-b-13	ebi-a-GCST90016992	genus Enterorhabdus id.820	rs3017103	G	A	G	A	-0.0980897	-0.000982991	NA	0.815601	FALSE	FALSE	FALSE	0.00198799	0.62	TRUE	11	62174193	0.0208995	2.94042e-06	22.028
childhood absence epilepsy || id:ieu-b-13	ebi-a-GCST90016992	genus Enterorhabdus id.820	rs73331712	T	C	T	C	0.26199	0.00295534	NA	0.0474028	FALSE	FALSE	FALSE	0.00362634	0.42	TRUE	12	69515102	0.055123	4.8492e-06	22.5894
childhood absence epilepsy || id:ieu-b-13	ebi-a-GCST90016992	genus Enterorhabdus id.820	rs77655283	G	A	G	A	0.132988	0.00213122	NA	0.0667273	FALSE	FALSE	FALSE	0.00309768	0.49	TRUE	2	236439879	0.0298306	5.88044e-06	19.8747
childhood absence epilepsy || id:ieu-b-13	ebi-a-GCST90016999	genus Eubacterium fissicatena group id.14373	rs1768152	C	T	C	T	-0.139489	0.00249044	NA	0.847939	FALSE	FALSE	FALSE	0.00214304	0.25	TRUE	3	39604954	0.0316186	8.70062e-06	19.4623
childhood absence epilepsy || id:ieu-b-13	ebi-a-GCST90016999	genus Eubacterium fissicatena group id.14373	rs6934739	A	G	A	G	0.111463	-0.00103977	NA	0.279079	FALSE	FALSE	FALSE	0.00170767	0.54	TRUE	6	39940437	0.0252788	9.75326e-06	19.4423
childhood absence epilepsy || id:ieu-b-13	ebi-a-GCST90016999	genus Eubacterium fissicatena group id.14373	rs7104872	G	A	G	A	0.138612	0.00175357	NA	0.183924	FALSE	FALSE	FALSE	0.00200022	0.38	TRUE	11	115165111	0.0291906	2.73149e-06	22.5484
childhood absence epilepsy || id:ieu-b-13	ebi-a-GCST90017003	genus Eubacterium rectale group id.14374	rs10248854	C	A	C	A	-0.0527827	0.0034679	NA	0.354479	FALSE	FALSE	FALSE	0.00160758	0.0309999	TRUE	7	121281238	0.0113464	4.20678e-06	21.6405
childhood absence epilepsy || id:ieu-b-13	ebi-a-GCST90017003	genus Eubacterium rectale group id.14374	rs10797540	A	G	A	G	0.0503179	-0.000263809	NA	0.430391	FALSE	FALSE	FALSE	0.00155388	0.87	TRUE	1	234530370	0.0108389	3.53387e-06	21.5514
childhood absence epilepsy || id:ieu-b-13	ebi-a-GCST90017003	genus Eubacterium rectale group id.14374	rs2884897	A	G	A	G	-0.129364	0.00070234	NA	0.0447208	FALSE	FALSE	FALSE	0.00370357	0.85	TRUE	11	8129537	0.0289021	6.44421e-06	20.034
childhood absence epilepsy || id:ieu-b-13	ebi-a-GCST90017003	genus Eubacterium rectale group id.14374	rs35398954	A	G	A	G	-0.0901402	0.00284574	NA	0.112671	FALSE	FALSE	FALSE	0.00245141	0.25	TRUE	15	93006765	0.0174602	5.39946e-07	26.6525
childhood absence epilepsy || id:ieu-b-13	ebi-a-GCST90017003	genus Eubacterium rectale group id.14374	rs62547233	A	G	A	G	0.0536319	-0.00118741	NA	0.279538	FALSE	FALSE	FALSE	0.0017456	0.5	TRUE	9	92013419	0.0120201	9.89829e-06	19.9081
childhood absence epilepsy || id:ieu-b-13	ebi-a-GCST90017011	genus Fusicatenibacter id.11305	rs10439674	A	G	A	G	-0.0572129	0.00406855	NA	0.209632	FALSE	FALSE	FALSE	0.00188848	0.0309999	TRUE	21	42681392	0.0130007	7.68493e-06	19.3666
childhood absence epilepsy || id:ieu-b-13	ebi-a-GCST90017011	genus Fusicatenibacter id.11305	rs167879	T	C	T	C	0.0659543	0.00121971	NA	0.835442	FALSE	FALSE	FALSE	0.00207883	0.56	TRUE	20	55937366	0.0148763	5.86894e-06	19.6561
childhood absence epilepsy || id:ieu-b-13	ebi-a-GCST90017011	genus Fusicatenibacter id.11305	rs2025938	G	A	G	A	-0.0967298	-0.000428917	NA	0.0805716	FALSE	FALSE	FALSE	0.00284125	0.88	TRUE	10	112177119	0.0205426	2.98834e-06	22.1722
childhood absence epilepsy || id:ieu-b-13	ebi-a-GCST90017011	genus Fusicatenibacter id.11305	rs206581	A	G	A	G	-0.0568339	0.00152391	NA	0.222845	FALSE	FALSE	FALSE	0.00186933	0.41	TRUE	18	10370596	0.0127894	8.95757e-06	19.7476
childhood absence epilepsy || id:ieu-b-13	ebi-a-GCST90017011	genus Fusicatenibacter id.11305	rs4378146	A	C	A	C	-0.0616691	0.00283644	NA	0.240357	FALSE	FALSE	FALSE	0.00179809	0.11	TRUE	1	24927625	0.0125259	7.20444e-07	24.2391
childhood absence epilepsy || id:ieu-b-13	ebi-a-GCST90017011	genus Fusicatenibacter id.11305	rs62187631	T	C	T	C	-0.0710571	-0.00070939	NA	0.13829	FALSE	FALSE	FALSE	0.00224666	0.75	TRUE	2	226649570	0.015924	4.54527e-06	19.9118
childhood absence epilepsy || id:ieu-b-13	ebi-a-GCST90017011	genus Fusicatenibacter id.11305	rs6515626	G	A	G	A	0.141575	0.00717131	NA	0.0433938	FALSE	FALSE	FALSE	0.00377083	0.0569994	TRUE	20	25257001	0.0313559	7.28652e-06	20.3861
childhood absence epilepsy || id:ieu-b-13	ebi-a-GCST90017011	genus Fusicatenibacter id.11305	rs73103914	A	G	A	G	-0.0597324	0.00117996	NA	0.202533	FALSE	FALSE	FALSE	0.00190784	0.54	TRUE	12	58658311	0.0134458	8.29564e-06	19.7354
childhood absence epilepsy || id:ieu-b-13	ebi-a-GCST90017011	genus Fusicatenibacter id.11305	rs792108	C	T	C	T	0.0508345	0.00120352	NA	0.645292	FALSE	FALSE	FALSE	0.0016478	0.47	TRUE	2	5532793	0.0113843	8.49533e-06	19.939
childhood absence epilepsy || id:ieu-b-13	ebi-a-GCST90017011	genus Fusicatenibacter id.11305	rs8028026	G	A	G	A	0.0792146	0.00568409	NA	0.894864	FALSE	FALSE	FALSE	0.00251251	0.0239999	TRUE	15	88353215	0.0180505	8.06325e-06	19.2589
childhood absence epilepsy || id:ieu-b-13	ebi-a-GCST90017011	genus Fusicatenibacter id.11305	rs8063430	T	C	T	C	-0.104026	-0.00327827	NA	0.0575214	FALSE	FALSE	FALSE	0.00331115	0.32	TRUE	16	73821805	0.022217	4.9289e-06	21.9237
childhood absence epilepsy || id:ieu-b-13	ebi-a-GCST90017012	genus Gordonibacter id.821	rs13412653	A	C	A	C	0.107597	-0.00254587	NA	0.348804	FALSE	FALSE	FALSE	0.00161478	0.11	TRUE	2	30158494	0.0239228	8.61133e-06	20.2291
childhood absence epilepsy || id:ieu-b-13	ebi-a-GCST90017012	genus Gordonibacter id.821	rs322296	G	A	G	A	0.17869	0.000645264	NA	0.111552	FALSE	FALSE	FALSE	0.0024698	0.79	TRUE	7	136937189	0.037722	4.0242e-06	22.4394
childhood absence epilepsy || id:ieu-b-13	ebi-a-GCST90017012	genus Gordonibacter id.821	rs3765837	T	G	T	G	-0.190729	-0.00459204	NA	0.0836659	FALSE	FALSE	FALSE	0.00281931	0.1	TRUE	1	210628449	0.0433608	7.16902e-06	19.3481
childhood absence epilepsy || id:ieu-b-13	ebi-a-GCST90017012	genus Gordonibacter id.821	rs4596722	G	A	G	A	-0.102908	0.00242211	NA	0.525425	FALSE	FALSE	FALSE	0.00153478	0.11	TRUE	9	88787144	0.0231571	9.0567e-06	19.7483
childhood absence epilepsy || id:ieu-b-13	ebi-a-GCST90017012	genus Gordonibacter id.821	rs71545975	A	G	A	G	-0.153972	0.00155822	NA	0.149826	FALSE	FALSE	FALSE	0.00215364	0.47	TRUE	7	47144505	0.0338918	7.03947e-06	20.6393
childhood absence epilepsy || id:ieu-b-13	ebi-a-GCST90017012	genus Gordonibacter id.821	rs72714787	C	A	C	A	0.181405	-0.0044431	NA	0.0971533	FALSE	FALSE	FALSE	0.00262902	0.0909997	TRUE	4	136768501	0.0377102	1.42889e-06	23.1409
childhood absence epilepsy || id:ieu-b-13	ebi-a-GCST90017012	genus Gordonibacter id.821	rs7294633	T	C	T	C	-0.12867	-0.00141596	NA	0.690559	FALSE	FALSE	FALSE	0.00166173	0.39	TRUE	12	29024534	0.0249946	3.43764e-07	26.501
childhood absence epilepsy || id:ieu-b-13	ebi-a-GCST90017019	genus Intestinimonas id.2062	rs12226153	A	G	A	G	-0.151142	0.000820762	NA	0.0557325	FALSE	FALSE	FALSE	0.00336328	0.81	TRUE	11	94364293	0.0306922	5.12165e-07	24.2501
childhood absence epilepsy || id:ieu-b-13	ebi-a-GCST90017019	genus Intestinimonas id.2062	rs17067892	C	T	C	T	0.107194	0.000473876	NA	0.0751795	FALSE	FALSE	FALSE	0.00289659	0.87	TRUE	8	3763540	0.0250013	6.37926e-06	18.383
childhood absence epilepsy || id:ieu-b-13	ebi-a-GCST90017019	genus Intestinimonas id.2062	rs1859797	G	A	G	A	0.060368	0.00134045	NA	0.467661	FALSE	FALSE	FALSE	0.00153914	0.38	TRUE	7	22007303	0.0131793	4.1223e-06	20.9811
childhood absence epilepsy || id:ieu-b-13	ebi-a-GCST90017019	genus Intestinimonas id.2062	rs6934519	C	T	C	T	0.0692373	-0.00178401	NA	0.253325	FALSE	FALSE	FALSE	0.00177148	0.31	TRUE	6	67200802	0.0151154	8.56959e-06	20.9817
childhood absence epilepsy || id:ieu-b-13	ebi-a-GCST90017019	genus Intestinimonas id.2062	rs716604	A	G	A	G	0.0818068	-0.0015725	NA	0.182717	FALSE	FALSE	FALSE	0.0019886	0.43	TRUE	2	6514088	0.0165992	8.56624e-07	24.2887
childhood absence epilepsy || id:ieu-b-13	ebi-a-GCST90017019	genus Intestinimonas id.2062	rs72982915	C	T	C	T	0.183158	-0.00559666	NA	0.0447441	FALSE	FALSE	FALSE	0.00374299	0.13	TRUE	2	140898088	0.0402743	4.91157e-06	20.6822
childhood absence epilepsy || id:ieu-b-13	ebi-a-GCST90017021	genus Lachnospiraceae FCS020 group id.11314	rs10093861	G	A	G	A	-0.0568869	-0.000115859	NA	0.493462	FALSE	FALSE	FALSE	0.00153275	0.94	TRUE	8	121244406	0.0121152	3.05626e-06	22.0477
childhood absence epilepsy || id:ieu-b-13	ebi-a-GCST90017021	genus Lachnospiraceae FCS020 group id.11314	rs1254846	A	G	A	G	-0.105963	0.00250524	NA	0.923292	FALSE	FALSE	FALSE	0.00289814	0.39	TRUE	10	44346094	0.0232501	5.59667e-06	20.7711
childhood absence epilepsy || id:ieu-b-13	ebi-a-GCST90017021	genus Lachnospiraceae FCS020 group id.11314	rs1363769	C	T	C	T	0.200628	0.00376595	NA	0.950988	FALSE	FALSE	FALSE	0.00354869	0.29	TRUE	19	17865305	0.0449372	1.58161e-06	19.9329
childhood absence epilepsy || id:ieu-b-13	ebi-a-GCST90017021	genus Lachnospiraceae FCS020 group id.11314	rs2322265	C	T	C	T	-0.0666305	-0.0017939	NA	0.24794	FALSE	FALSE	FALSE	0.00178016	0.31	TRUE	4	166588085	0.0141577	5.20811e-06	22.1493
childhood absence epilepsy || id:ieu-b-13	ebi-a-GCST90017021	genus Lachnospiraceae FCS020 group id.11314	rs2862811	C	T	C	T	-0.0564927	-0.00171735	NA	0.555036	FALSE	FALSE	FALSE	0.00153999	0.26	TRUE	3	165996415	0.0121736	3.91913e-06	21.5351
childhood absence epilepsy || id:ieu-b-13	ebi-a-GCST90017021	genus Lachnospiraceae FCS020 group id.11314	rs3999074	G	T	G	T	-0.0550587	0.00325149	NA	0.423085	FALSE	FALSE	FALSE	0.00154447	0.0350002	TRUE	10	65563647	0.0121847	6.55043e-06	20.4184
childhood absence epilepsy || id:ieu-b-13	ebi-a-GCST90017021	genus Lachnospiraceae FCS020 group id.11314	rs9788306	C	T	C	T	-0.062804	-0.00303574	NA	0.296182	FALSE	FALSE	FALSE	0.00169651	0.0739997	TRUE	13	40419314	0.0130744	1.38618e-06	23.0744
childhood absence epilepsy || id:ieu-b-13	ebi-a-GCST90017025	genus Lachnospiraceae UCG001 id.11321	rs2050911	G	A	G	A	0.0751466	0.000858889	NA	0.297784	FALSE	FALSE	FALSE	0.00167085	0.61	TRUE	1	82384407	0.0153934	1.10647e-06	23.8314
childhood absence epilepsy || id:ieu-b-13	ebi-a-GCST90017025	genus Lachnospiraceae UCG001 id.11321	rs4981345	T	C	T	C	-0.0681973	-0.00148108	NA	0.339118	FALSE	FALSE	FALSE	0.00163071	0.36	TRUE	14	21455973	0.0149831	6.08597e-06	20.7172
childhood absence epilepsy || id:ieu-b-13	ebi-a-GCST90017025	genus Lachnospiraceae UCG001 id.11321	rs573933	T	C	T	C	-0.107898	-0.00113133	NA	0.0895621	FALSE	FALSE	FALSE	0.00269986	0.68	TRUE	9	14477851	0.0232346	3.10506e-06	21.5653
childhood absence epilepsy || id:ieu-b-13	ebi-a-GCST90017025	genus Lachnospiraceae UCG001 id.11321	rs62496417	T	G	T	G	-0.0748504	-0.00371133	NA	0.238292	FALSE	FALSE	FALSE	0.00181195	0.0409996	TRUE	7	96965504	0.0165681	5.87503e-06	20.41
childhood absence epilepsy || id:ieu-b-13	ebi-a-GCST90017025	genus Lachnospiraceae UCG001 id.11321	rs7341608	T	C	T	C	-0.0784757	-0.00201657	NA	0.195155	FALSE	FALSE	FALSE	0.00193273	0.3	TRUE	8	56839500	0.0177648	9.48135e-06	19.5142
childhood absence epilepsy || id:ieu-b-13	ebi-a-GCST90017025	genus Lachnospiraceae UCG001 id.11321	rs9403580	C	T	C	T	0.107801	-0.00504107	NA	0.10331	FALSE	FALSE	FALSE	0.00252593	0.0460002	TRUE	6	145006780	0.0229777	3.46785e-06	22.0106
childhood absence epilepsy || id:ieu-b-13	ebi-a-GCST90017025	genus Lachnospiraceae UCG001 id.11321	rs985416	T	C	T	C	-0.0970258	-0.00238332	NA	0.805602	FALSE	FALSE	FALSE	0.00194546	0.22	TRUE	3	148269083	0.0181807	1.45589e-07	28.4809
childhood absence epilepsy || id:ieu-b-13	ebi-a-GCST90017027	genus Lachnospiraceae UCG008 id.11328	rs10741777	T	C	T	C	-0.0973842	-0.000226413	NA	0.237557	FALSE	FALSE	FALSE	0.00181747	0.9	TRUE	11	19572557	0.0194791	7.68652e-07	24.9942
childhood absence epilepsy || id:ieu-b-13	ebi-a-GCST90017027	genus Lachnospiraceae UCG008 id.11328	rs10793103	T	C	T	C	-0.0974344	-0.00183793	NA	0.683821	FALSE	FALSE	FALSE	0.00167866	0.27	TRUE	11	74391775	0.0181279	9.34932e-08	28.8888
childhood absence epilepsy || id:ieu-b-13	ebi-a-GCST90017027	genus Lachnospiraceae UCG008 id.11328	rs10801803	G	A	G	A	-0.117029	-0.000225462	NA	0.137096	FALSE	FALSE	FALSE	0.00222706	0.92	TRUE	1	90818872	0.0243085	1.4003e-06	23.1777
childhood absence epilepsy || id:ieu-b-13	ebi-a-GCST90017027	genus Lachnospiraceae UCG008 id.11328	rs13024781	T	C	T	C	-0.0798769	-0.00184041	NA	0.463178	FALSE	FALSE	FALSE	0.0015388	0.23	TRUE	2	168628871	0.0168846	2.29166e-06	22.38
childhood absence epilepsy || id:ieu-b-13	ebi-a-GCST90017027	genus Lachnospiraceae UCG008 id.11328	rs57091572	A	G	A	G	-0.110443	0.00236276	NA	0.144669	FALSE	FALSE	FALSE	0.00218593	0.28	TRUE	6	81214803	0.0235801	2.85825e-06	21.9374
childhood absence epilepsy || id:ieu-b-13	ebi-a-GCST90017027	genus Lachnospiraceae UCG008 id.11328	rs67078837	T	C	T	C	-0.0845848	0.00212851	NA	0.467301	FALSE	FALSE	FALSE	0.00154618	0.17	TRUE	4	114220647	0.0170693	7.68192e-07	24.5558
childhood absence epilepsy || id:ieu-b-13	ebi-a-GCST90017030	genus Lactobacillus id.1837	rs75127669	C	A	C	A	0.139784	0.00199053	NA	0.0654111	FALSE	FALSE	FALSE	0.00320373	0.53	TRUE	6	151027636	0.0310414	6.83439e-06	20.2783
childhood absence epilepsy || id:ieu-b-13	ebi-a-GCST90017030	genus Lactobacillus id.1837	rs768253	T	G	T	G	-0.079195	-0.000731571	NA	0.393708	FALSE	FALSE	FALSE	0.00157724	0.64	TRUE	8	69010103	0.0171791	4.24766e-06	21.2518
childhood absence epilepsy || id:ieu-b-13	ebi-a-GCST90017030	genus Lactobacillus id.1837	rs921925	A	C	A	C	0.0985077	-0.00232059	NA	0.216728	FALSE	FALSE	FALSE	0.00188955	0.22	TRUE	19	6928017	0.0203229	9.71673e-07	23.4947
childhood absence epilepsy || id:ieu-b-13	ebi-a-GCST90017032	genus Marvinbryantia id.2005	rs11620597	T	C	T	C	0.119479	0.00349919	NA	0.0597	FALSE	FALSE	FALSE	0.0032423	0.28	TRUE	13	86079090	0.0271688	7.80171e-06	19.3394
childhood absence epilepsy || id:ieu-b-13	ebi-a-GCST90017032	genus Marvinbryantia id.2005	rs2724813	G	A	G	A	0.0840769	-0.00255488	NA	0.812829	FALSE	FALSE	FALSE	0.00199919	0.2	TRUE	10	12516924	0.0167551	6.28449e-07	25.1802
childhood absence epilepsy || id:ieu-b-13	ebi-a-GCST90017032	genus Marvinbryantia id.2005	rs3125832	A	C	A	C	0.0679323	0.000381746	NA	0.240188	FALSE	FALSE	FALSE	0.0018444	0.84	TRUE	1	211400180	0.015012	5.02736e-06	20.4774
childhood absence epilepsy || id:ieu-b-13	ebi-a-GCST90017032	genus Marvinbryantia id.2005	rs61884471	G	A	G	A	0.124426	-0.000474362	NA	0.0731879	FALSE	FALSE	FALSE	0.00295492	0.87	TRUE	11	45826561	0.0248431	1.01163e-06	25.0848
childhood absence epilepsy || id:ieu-b-13	ebi-a-GCST90017032	genus Marvinbryantia id.2005	rs8006832	G	T	G	T	-0.0952415	0.0032937	NA	0.108176	FALSE	FALSE	FALSE	0.0024751	0.18	TRUE	14	21577837	0.0216699	6.58082e-06	19.317
childhood absence epilepsy || id:ieu-b-13	ebi-a-GCST90017039	genus Parabacteroides id.954	rs4236095	A	G	A	G	-0.0761961	0.000918782	NA	0.861754	FALSE	FALSE	FALSE	0.00223169	0.68	TRUE	6	47368687	0.0157042	1.93143e-06	23.5415
childhood absence epilepsy || id:ieu-b-13	ebi-a-GCST90017039	genus Parabacteroides id.954	rs60884758	C	T	C	T	-0.0702667	0.000415067	NA	0.171512	FALSE	FALSE	FALSE	0.0020777	0.84	TRUE	9	2217340	0.0142249	5.7069e-07	24.4006
childhood absence epilepsy || id:ieu-b-13	ebi-a-GCST90017039	genus Parabacteroides id.954	rs6657302	T	C	T	C	-0.10452	0.000408241	NA	0.0586634	FALSE	FALSE	FALSE	0.00325058	0.9	TRUE	1	85585609	0.0225521	9.75708e-06	21.4795
childhood absence epilepsy || id:ieu-b-13	ebi-a-GCST90017039	genus Parabacteroides id.954	rs7298818	C	T	C	T	0.0888832	0.00107059	NA	0.0817604	FALSE	FALSE	FALSE	0.00279747	0.7	TRUE	12	56396953	0.0200902	8.53631e-06	19.5736
childhood absence epilepsy || id:ieu-b-13	ebi-a-GCST90017042	genus Peptococcus id.2037	rs10031059	C	T	C	T	0.121167	0.00137418	NA	0.765831	FALSE	FALSE	FALSE	0.00181064	0.450001	TRUE	4	35358594	0.0225844	1.23637e-07	28.784
childhood absence epilepsy || id:ieu-b-13	ebi-a-GCST90017042	genus Peptococcus id.2037	rs11001941	G	A	G	A	-0.195611	-0.0036106	NA	0.0637373	FALSE	FALSE	FALSE	0.00313496	0.25	TRUE	10	78716030	0.0392217	1.32859e-06	24.8733
childhood absence epilepsy || id:ieu-b-13	ebi-a-GCST90017042	genus Peptococcus id.2037	rs12069354	C	T	C	T	0.16763	0.00229737	NA	0.0612988	FALSE	FALSE	FALSE	0.00321467	0.47	TRUE	1	216223782	0.0379501	9.28346e-06	19.5109
childhood absence epilepsy || id:ieu-b-13	ebi-a-GCST90017042	genus Peptococcus id.2037	rs413827	G	A	G	A	0.110229	0.00254666	NA	0.204876	FALSE	FALSE	FALSE	0.00189276	0.18	TRUE	14	57985112	0.0237523	3.30088e-06	21.5368
childhood absence epilepsy || id:ieu-b-13	ebi-a-GCST90017042	genus Peptococcus id.2037	rs6918730	A	G	A	G	-0.135311	0.0039665	NA	0.888055	FALSE	FALSE	FALSE	0.00243925	0.1	TRUE	6	99020289	0.0289742	1.14731e-06	21.8094
childhood absence epilepsy || id:ieu-b-13	ebi-a-GCST90017042	genus Peptococcus id.2037	rs7033353	G	T	G	T	-0.090152	0.00187729	NA	0.586149	FALSE	FALSE	FALSE	0.00156119	0.23	TRUE	9	104595848	0.018995	2.21958e-06	22.5254
childhood absence epilepsy || id:ieu-b-13	ebi-a-GCST90017042	genus Peptococcus id.2037	rs74592222	G	A	G	A	0.137957	-0.00395798	NA	0.105889	FALSE	FALSE	FALSE	0.0025345	0.12	TRUE	1	75971700	0.0302965	8.55342e-06	20.7349
childhood absence epilepsy || id:ieu-b-13	ebi-a-GCST90017047	genus Romboutsia id.11347	rs11221428	T	C	T	C	-0.0726779	0.00210635	NA	0.169742	FALSE	FALSE	FALSE	0.00205006	0.3	TRUE	11	99665050	0.0158263	6.48649e-06	21.0885
childhood absence epilepsy || id:ieu-b-13	ebi-a-GCST90017047	genus Romboutsia id.11347	rs16843578	C	T	C	T	-0.0875276	-0.000176362	NA	0.0889389	FALSE	FALSE	FALSE	0.00269581	0.95	TRUE	1	171903885	0.0196779	5.08124e-06	19.7848
childhood absence epilepsy || id:ieu-b-13	ebi-a-GCST90017047	genus Romboutsia id.11347	rs34302036	G	A	G	A	-0.0550261	0.00246749	NA	0.582929	FALSE	FALSE	FALSE	0.00156241	0.11	TRUE	7	78136725	0.0120835	5.87665e-06	20.7373
childhood absence epilepsy || id:ieu-b-13	ebi-a-GCST90017047	genus Romboutsia id.11347	rs61841503	G	A	G	A	0.092888	-0.0026802	NA	0.156777	FALSE	FALSE	FALSE	0.0021218	0.21	TRUE	10	17019559	0.0171454	3.99595e-08	29.3511
childhood absence epilepsy || id:ieu-b-13	ebi-a-GCST90017047	genus Romboutsia id.11347	rs62504452	A	G	A	G	-0.0710048	0.000851909	NA	0.165707	FALSE	FALSE	FALSE	0.00207438	0.68	TRUE	7	145760298	0.0156654	4.65833e-06	20.5444
childhood absence epilepsy || id:ieu-b-13	ebi-a-GCST90017047	genus Romboutsia id.11347	rs9389266	T	G	T	G	0.0722815	-0.000973997	NA	0.152459	FALSE	FALSE	FALSE	0.00212214	0.649999	TRUE	6	135411737	0.0162353	9.38469e-06	19.8214
childhood absence epilepsy || id:ieu-b-13	ebi-a-GCST90017047	genus Romboutsia id.11347	rs9567264	C	T	C	T	0.0580018	0.00022583	NA	0.307096	FALSE	FALSE	FALSE	0.00168388	0.89	TRUE	13	32720756	0.0127495	5.75692e-06	20.6965
childhood absence epilepsy || id:ieu-b-13	ebi-a-GCST90017050	genus Ruminiclostridium6 id.11356	rs10829821	T	C	T	C	-0.097606	-0.00613757	NA	0.0897239	FALSE	FALSE	FALSE	0.00268811	0.0219999	TRUE	10	132651293	0.0216072	3.47144e-06	20.4059
childhood absence epilepsy || id:ieu-b-13	ebi-a-GCST90017050	genus Ruminiclostridium6 id.11356	rs2548459	C	T	C	T	0.0554866	-0.00269567	NA	0.502837	FALSE	FALSE	FALSE	0.00151901	0.0759994	TRUE	19	49209339	0.0122755	6.40206e-06	20.4314
childhood absence epilepsy || id:ieu-b-13	ebi-a-GCST90017050	genus Ruminiclostridium6 id.11356	rs61060922	T	G	T	G	0.15913	-0.00405199	NA	0.053408	FALSE	FALSE	FALSE	0.00340977	0.23	TRUE	16	72136154	0.0322283	1.08648e-06	24.3798
childhood absence epilepsy || id:ieu-b-13	ebi-a-GCST90017050	genus Ruminiclostridium6 id.11356	rs663262	C	T	C	T	0.13498	0.00469378	NA	0.94767	FALSE	FALSE	FALSE	0.00345072	0.17	TRUE	11	86179076	0.0310715	3.39414e-06	18.8718
childhood absence epilepsy || id:ieu-b-13	ebi-a-GCST90017050	genus Ruminiclostridium6 id.11356	rs73176030	T	C	T	C	0.058665	-0.00215544	NA	0.317079	FALSE	FALSE	FALSE	0.001661	0.19	TRUE	7	101271282	0.013208	7.28887e-06	19.728
childhood absence epilepsy || id:ieu-b-13	ebi-a-GCST90017050	genus Ruminiclostridium6 id.11356	rs77193512	A	G	A	G	0.0736533	0.000143089	NA	0.194385	FALSE	FALSE	FALSE	0.00193786	0.94	TRUE	11	40289063	0.0153163	1.29587e-06	23.1247
childhood absence epilepsy || id:ieu-b-13	ebi-a-GCST90017050	genus Ruminiclostridium6 id.11356	rs79968172	G	A	G	A	0.11614	-0.000690066	NA	0.0598837	FALSE	FALSE	FALSE	0.00320982	0.83	TRUE	1	240503826	0.0243083	1.66054e-06	22.8273
childhood absence epilepsy || id:ieu-b-13	ebi-a-GCST90017050	genus Ruminiclostridium6 id.11356	rs9555756	A	C	A	C	-0.0804138	-0.00104968	NA	0.138309	FALSE	FALSE	FALSE	0.00221714	0.64	TRUE	13	111703249	0.0176692	7.10133e-06	20.7123
childhood absence epilepsy || id:ieu-b-13	ebi-a-GCST90017052	genus Ruminococcaceae NK4A214 group id.11358	rs12642039	C	T	C	T	0.0553003	-0.000759406	NA	0.653636	FALSE	FALSE	FALSE	0.00163808	0.64	TRUE	4	159932022	0.0119397	3.43005e-06	21.452
childhood absence epilepsy || id:ieu-b-13	ebi-a-GCST90017052	genus Ruminococcaceae NK4A214 group id.11358	rs12731	A	G	A	G	-0.0527684	0.00215024	NA	0.444845	FALSE	FALSE	FALSE	0.00153149	0.16	TRUE	2	239087912	0.0115053	4.87237e-06	21.0355
childhood absence epilepsy || id:ieu-b-13	ebi-a-GCST90017052	genus Ruminococcaceae NK4A214 group id.11358	rs13087692	G	T	G	T	-0.0574623	0.00244566	NA	0.689992	FALSE	FALSE	FALSE	0.00165953	0.14	TRUE	3	84725039	0.012594	8.69221e-06	20.818
childhood absence epilepsy || id:ieu-b-13	ebi-a-GCST90017052	genus Ruminococcaceae NK4A214 group id.11358	rs6681678	T	C	T	C	0.100174	-0.0035017	NA	0.945491	FALSE	FALSE	FALSE	0.00335776	0.3	TRUE	1	100248591	0.024	9.0494e-06	17.4216
childhood absence epilepsy || id:ieu-b-13	ebi-a-GCST90017054	genus Ruminococcaceae UCG003 id.11361	rs10490280	C	T	C	T	-0.0672094	-0.00163978	NA	0.23029	FALSE	FALSE	FALSE	0.00182742	0.37	TRUE	2	37905976	0.0143309	4.15547e-06	21.9944
childhood absence epilepsy || id:ieu-b-13	ebi-a-GCST90017054	genus Ruminococcaceae UCG003 id.11361	rs11613919	G	T	G	T	0.0727604	0.00101626	NA	0.175059	FALSE	FALSE	FALSE	0.00203064	0.62	TRUE	12	75496463	0.0155716	1.6251e-06	21.8335
childhood absence epilepsy || id:ieu-b-13	ebi-a-GCST90017054	genus Ruminococcaceae UCG003 id.11361	rs3013089	G	A	G	A	-0.0551473	0.00282472	NA	0.399574	FALSE	FALSE	FALSE	0.00158893	0.0749998	TRUE	1	13794594	0.0120346	4.38137e-06	20.9984
childhood absence epilepsy || id:ieu-b-13	ebi-a-GCST90017054	genus Ruminococcaceae UCG003 id.11361	rs4452755	A	C	A	C	-0.0634463	-0.00161644	NA	0.279378	FALSE	FALSE	FALSE	0.00170927	0.34	TRUE	8	82026852	0.0134741	3.29337e-06	22.1724
childhood absence epilepsy || id:ieu-b-13	ebi-a-GCST90017054	genus Ruminococcaceae UCG003 id.11361	rs4532474	G	A	G	A	0.0769231	-0.000143115	NA	0.141694	FALSE	FALSE	FALSE	0.0022191	0.95	TRUE	6	105781538	0.017045	4.82125e-06	20.3666
childhood absence epilepsy || id:ieu-b-13	ebi-a-GCST90017054	genus Ruminococcaceae UCG003 id.11361	rs646327	G	A	G	A	0.0586696	-0.00266582	NA	0.500142	FALSE	FALSE	FALSE	0.0015258	0.0810009	TRUE	19	49209851	0.0118369	7.83177e-07	24.5669
childhood absence epilepsy || id:ieu-b-13	ebi-a-GCST90017054	genus Ruminococcaceae UCG003 id.11361	rs6759615	A	G	A	G	0.102523	-0.0011028	NA	0.0782036	FALSE	FALSE	FALSE	0.00285826	0.7	TRUE	2	205238716	0.0200204	7.86231e-07	26.2239
childhood absence epilepsy || id:ieu-b-13	ebi-a-GCST90017054	genus Ruminococcaceae UCG003 id.11361	rs73341549	T	C	T	C	-0.169857	0.00155625	NA	0.0532158	FALSE	FALSE	FALSE	0.00343543	0.649999	TRUE	7	51541468	0.0318768	1.50952e-07	28.3934
childhood absence epilepsy || id:ieu-b-13	ebi-a-GCST90017055	genus Ruminococcaceae UCG004 id.11362	rs10976229	T	G	T	G	0.095976	-0.00195622	NA	0.134691	FALSE	FALSE	FALSE	0.00224869	0.38	TRUE	9	7317307	0.0214554	7.04482e-06	20.0102
childhood absence epilepsy || id:ieu-b-13	ebi-a-GCST90017055	genus Ruminococcaceae UCG004 id.11362	rs11961899	G	A	G	A	-0.0707825	-0.00180225	NA	0.289158	FALSE	FALSE	FALSE	0.00170471	0.29	TRUE	6	132887921	0.0161381	9.18015e-06	19.2374
childhood absence epilepsy || id:ieu-b-13	ebi-a-GCST90017055	genus Ruminococcaceae UCG004 id.11362	rs12125734	G	T	G	T	0.133972	0.00388737	NA	0.093006	FALSE	FALSE	FALSE	0.00263433	0.14	TRUE	1	103732214	0.0257416	2.09426e-07	27.0868
childhood absence epilepsy || id:ieu-b-13	ebi-a-GCST90017055	genus Ruminococcaceae UCG004 id.11362	rs2248146	T	C	T	C	0.0689452	-0.000813323	NA	0.325983	FALSE	FALSE	FALSE	0.00164617	0.62	TRUE	7	24791998	0.0153649	8.19993e-06	20.1349
childhood absence epilepsy || id:ieu-b-13	ebi-a-GCST90017055	genus Ruminococcaceae UCG004 id.11362	rs511258	G	A	G	A	-0.0757474	-0.00232426	NA	0.260486	FALSE	FALSE	FALSE	0.0017849	0.19	TRUE	3	169966722	0.0162475	4.52054e-06	21.7351
childhood absence epilepsy || id:ieu-b-13	ebi-a-GCST90017055	genus Ruminococcaceae UCG004 id.11362	rs6769553	A	G	A	G	0.0849743	0.000126097	NA	0.295752	FALSE	FALSE	FALSE	0.00169839	0.94	TRUE	3	54427795	0.0157451	7.91061e-08	29.1262
childhood absence epilepsy || id:ieu-b-13	ebi-a-GCST90017056	genus Ruminococcaceae UCG005 id.11363	rs10873449	C	T	C	T	-0.0654843	0.00311429	NA	0.827326	FALSE	FALSE	FALSE	0.00203925	0.13	TRUE	14	94630731	0.0143973	4.11169e-06	20.6877
childhood absence epilepsy || id:ieu-b-13	ebi-a-GCST90017056	genus Ruminococcaceae UCG005 id.11363	rs10950694	C	T	C	T	-0.0577628	0.00102376	NA	0.578042	FALSE	FALSE	FALSE	0.00157096	0.51	TRUE	7	18026604	0.011412	4.29804e-07	25.6196
childhood absence epilepsy || id:ieu-b-13	ebi-a-GCST90017056	genus Ruminococcaceae UCG005 id.11363	rs114279581	A	G	A	G	-0.146604	-0.00530705	NA	0.0574061	FALSE	FALSE	FALSE	0.00330526	0.11	TRUE	2	198122357	0.0316034	3.21855e-06	21.5191
childhood absence epilepsy || id:ieu-b-13	ebi-a-GCST90017056	genus Ruminococcaceae UCG005 id.11363	rs12288512	A	G	A	G	0.066635	-5.85366e-05	NA	0.193523	FALSE	FALSE	FALSE	0.00194182	0.98	TRUE	11	27747671	0.0144356	3.10277e-06	21.3076
childhood absence epilepsy || id:ieu-b-13	ebi-a-GCST90017056	genus Ruminococcaceae UCG005 id.11363	rs12458218	T	C	T	C	0.0677322	0.00154356	NA	0.173559	FALSE	FALSE	FALSE	0.00202555	0.450001	TRUE	18	22575871	0.0144525	2.41024e-06	21.9636
childhood absence epilepsy || id:ieu-b-13	ebi-a-GCST90017056	genus Ruminococcaceae UCG005 id.11363	rs2893871	G	A	G	A	-0.073644	-0.00228532	NA	0.150433	FALSE	FALSE	FALSE	0.00215842	0.29	TRUE	10	62662781	0.015548	3.53843e-06	22.435
childhood absence epilepsy || id:ieu-b-13	ebi-a-GCST90017056	genus Ruminococcaceae UCG005 id.11363	rs7449320	C	A	C	A	0.0599163	-0.00136716	NA	0.220812	FALSE	FALSE	FALSE	0.00187145	0.47	TRUE	5	154003091	0.0130836	4.80773e-06	20.9718
childhood absence epilepsy || id:ieu-b-13	ebi-a-GCST90017056	genus Ruminococcaceae UCG005 id.11363	rs7586445	G	A	G	A	0.0782349	-0.00230981	NA	0.130506	FALSE	FALSE	FALSE	0.00227353	0.31	TRUE	2	239509030	0.0176458	8.81455e-06	19.6571
childhood absence epilepsy || id:ieu-b-13	ebi-a-GCST90017057	genus Ruminococcaceae UCG009 id.11366	rs113006825	T	C	T	C	-0.0928893	0.00258453	NA	0.203898	FALSE	FALSE	FALSE	0.00194027	0.18	TRUE	6	51803869	0.0208035	7.97701e-06	19.9369
childhood absence epilepsy || id:ieu-b-13	ebi-a-GCST90017057	genus Ruminococcaceae UCG009 id.11366	rs2058609	G	A	G	A	-0.0816464	0.000577171	NA	0.672238	FALSE	FALSE	FALSE	0.00165455	0.73	TRUE	12	12970792	0.017472	3.12486e-06	21.8368
childhood absence epilepsy || id:ieu-b-13	ebi-a-GCST90017057	genus Ruminococcaceae UCG009 id.11366	rs2192926	A	G	A	G	-0.089048	-0.00290688	NA	0.234332	FALSE	FALSE	FALSE	0.00179999	0.11	TRUE	2	75512668	0.0192989	4.87742e-06	21.2904
childhood absence epilepsy || id:ieu-b-13	ebi-a-GCST90017057	genus Ruminococcaceae UCG009 id.11366	rs4079028	C	T	C	T	0.0915623	0.0028721	NA	0.212776	FALSE	FALSE	FALSE	0.00187882	0.13	TRUE	1	202299085	0.019936	3.28246e-06	21.0939
childhood absence epilepsy || id:ieu-b-13	ebi-a-GCST90017057	genus Ruminococcaceae UCG009 id.11366	rs4708333	T	G	T	G	-0.084033	-0.000171556	NA	0.310258	FALSE	FALSE	FALSE	0.00165854	0.92	TRUE	6	78106701	0.0174757	1.56246e-06	23.1223
childhood absence epilepsy || id:ieu-b-13	ebi-a-GCST90017057	genus Ruminococcaceae UCG009 id.11366	rs6952765	G	A	G	A	0.0732099	-0.00072369	NA	0.43915	FALSE	FALSE	FALSE	0.00154898	0.64	TRUE	7	32001710	0.0166777	8.13055e-06	19.2694
childhood absence epilepsy || id:ieu-b-13	ebi-a-GCST90017057	genus Ruminococcaceae UCG009 id.11366	rs78410648	A	G	A	G	0.120989	-0.00131823	NA	0.0928695	FALSE	FALSE	FALSE	0.00266553	0.62	TRUE	19	52399401	0.0277317	9.67208e-06	19.0344
childhood absence epilepsy || id:ieu-b-13	ebi-a-GCST90017058	genus Ruminococcaceae UCG010 id.11367	rs12597105	A	G	A	G	-0.0670855	0.00146816	NA	0.7322	FALSE	FALSE	FALSE	0.0017564	0.4	TRUE	16	5233941	0.0144415	4.87304e-06	21.5791
childhood absence epilepsy || id:ieu-b-13	ebi-a-GCST90017058	genus Ruminococcaceae UCG010 id.11367	rs682403	A	G	A	G	-0.0588161	-0.00122881	NA	0.494794	FALSE	FALSE	FALSE	0.0015434	0.43	TRUE	9	135968557	0.0124671	2.36537e-06	22.2567
childhood absence epilepsy || id:ieu-b-13	ebi-a-GCST90017058	genus Ruminococcaceae UCG010 id.11367	rs6958419	C	T	C	T	-0.0585718	0.00355318	NA	0.47434	FALSE	FALSE	FALSE	0.0015447	0.021	TRUE	7	16349864	0.0124994	2.84165e-06	21.9583
childhood absence epilepsy || id:ieu-b-13	ebi-a-GCST90017062	genus Ruminococcus1 id.11373	rs10167839	A	G	A	G	0.0519509	-0.00266773	NA	0.34194	FALSE	FALSE	FALSE	0.00162418	0.1	TRUE	2	181882879	0.0116306	8.09245e-06	19.9518
childhood absence epilepsy || id:ieu-b-13	ebi-a-GCST90017062	genus Ruminococcus1 id.11373	rs11783695	G	T	G	T	-0.0734114	0.000386366	NA	0.133893	FALSE	FALSE	FALSE	0.00227323	0.87	TRUE	8	144596903	0.0161398	4.72683e-06	20.6886
childhood absence epilepsy || id:ieu-b-13	ebi-a-GCST90017062	genus Ruminococcus1 id.11373	rs7583465	C	T	C	T	0.0527654	0.000380396	NA	0.394117	FALSE	FALSE	FALSE	0.00157164	0.81	TRUE	2	10533921	0.0112619	2.55611e-06	21.9521
childhood absence epilepsy || id:ieu-b-13	ebi-a-GCST90017062	genus Ruminococcus1 id.11373	rs78572139	G	A	G	A	0.125038	-0.002477	NA	0.0589743	FALSE	FALSE	FALSE	0.00328487	0.450001	TRUE	5	15944587	0.0279411	5.23106e-06	20.0261
childhood absence epilepsy || id:ieu-b-13	ebi-a-GCST90017063	genus Ruminococcus2 id.11374	rs12406309	A	C	A	C	-0.063193	-0.00179847	NA	0.202098	FALSE	FALSE	FALSE	0.00192749	0.35	TRUE	1	108074445	0.0142275	9.78949e-06	19.7279
childhood absence epilepsy || id:ieu-b-13	ebi-a-GCST90017063	genus Ruminococcus2 id.11374	rs12986628	T	C	T	C	-0.0665937	0.00118111	NA	0.783883	FALSE	FALSE	FALSE	0.00188211	0.53	TRUE	2	238103439	0.0140168	2.142e-06	22.5719
childhood absence epilepsy || id:ieu-b-13	ebi-a-GCST90017063	genus Ruminococcus2 id.11374	rs4400279	A	G	A	G	0.0546114	-0.00290647	NA	0.359094	FALSE	FALSE	FALSE	0.00160871	0.0710003	TRUE	7	16804578	0.0120077	5.79923e-06	20.6846
childhood absence epilepsy || id:ieu-b-13	ebi-a-GCST90017063	genus Ruminococcus2 id.11374	rs55707116	C	A	C	A	0.0865522	-0.00120556	NA	0.0944392	FALSE	FALSE	FALSE	0.00264497	0.649999	TRUE	9	79919385	0.0189141	8.0059e-06	20.9404
childhood absence epilepsy || id:ieu-b-13	ebi-a-GCST90017063	genus Ruminococcus2 id.11374	rs58681734	A	G	A	G	0.0723875	-0.00272727	NA	0.147759	FALSE	FALSE	FALSE	0.00216595	0.21	TRUE	9	137557890	0.0160787	4.18177e-06	20.2687
childhood absence epilepsy || id:ieu-b-13	ebi-a-GCST90017063	genus Ruminococcus2 id.11374	rs61791565	T	C	T	C	-0.0523503	-0.000934172	NA	0.402269	FALSE	FALSE	FALSE	0.00158381	0.56	TRUE	4	24655463	0.0117119	6.78938e-06	19.9795
childhood absence epilepsy || id:ieu-b-13	ebi-a-GCST90017065	genus Ruminococcus gnavus group id.14376	rs12136548	C	T	C	T	0.0901946	0.00135948	NA	0.298556	FALSE	FALSE	FALSE	0.00167208	0.42	TRUE	1	115168097	0.0196476	3.09628e-06	21.0738
childhood absence epilepsy || id:ieu-b-13	ebi-a-GCST90017065	genus Ruminococcus gnavus group id.14376	rs12989336	G	A	G	A	-0.0846861	-0.00121508	NA	0.332191	FALSE	FALSE	FALSE	0.00163277	0.46	TRUE	2	36259341	0.0187936	7.11803e-06	20.3051
childhood absence epilepsy || id:ieu-b-13	ebi-a-GCST90017065	genus Ruminococcus gnavus group id.14376	rs13163520	G	A	G	A	-0.127377	-0.000318041	NA	0.170287	FALSE	FALSE	FALSE	0.00208043	0.88	TRUE	5	18662686	0.0233883	5.61009e-08	29.6609
childhood absence epilepsy || id:ieu-b-13	ebi-a-GCST90017065	genus Ruminococcus gnavus group id.14376	rs2909242	A	C	A	C	0.0909965	-7.19428e-05	NA	0.635796	FALSE	FALSE	FALSE	0.00163354	0.96	TRUE	8	129224680	0.018351	7.40952e-07	24.5884
childhood absence epilepsy || id:ieu-b-13	ebi-a-GCST90017065	genus Ruminococcus gnavus group id.14376	rs3124783	G	A	G	A	0.11599	0.000892962	NA	0.862571	FALSE	FALSE	FALSE	0.00223961	0.69	TRUE	9	135838591	0.0249099	2.6652e-06	21.6819
childhood absence epilepsy || id:ieu-b-13	ebi-a-GCST90017065	genus Ruminococcus gnavus group id.14376	rs4388134	T	C	T	C	0.0904997	-0.00166737	NA	0.768842	FALSE	FALSE	FALSE	0.00184773	0.37	TRUE	4	190110710	0.0203544	9.11633e-06	19.7687
childhood absence epilepsy || id:ieu-b-13	ebi-a-GCST90017065	genus Ruminococcus gnavus group id.14376	rs78399089	T	C	T	C	0.144445	-0.00319169	NA	0.0809787	FALSE	FALSE	FALSE	0.00283968	0.26	TRUE	3	146290310	0.0326618	6.62995e-06	19.558
childhood absence epilepsy || id:ieu-b-13	ebi-a-GCST90017068	genus Senegalimassilia id.11160	rs10036909	C	T	C	T	0.185519	-0.00466769	NA	0.0624362	FALSE	FALSE	FALSE	0.00319283	0.14	TRUE	5	127861692	0.0400881	8.05434e-06	21.4164
childhood absence epilepsy || id:ieu-b-13	ebi-a-GCST90017068	genus Senegalimassilia id.11160	rs11787826	C	A	C	A	0.081327	0.000712492	NA	0.447269	FALSE	FALSE	FALSE	0.00154144	0.64	TRUE	9	34332382	0.0171154	2.63463e-06	22.5785
childhood absence epilepsy || id:ieu-b-13	ebi-a-GCST90017068	genus Senegalimassilia id.11160	rs7225245	A	G	A	G	-0.079173	-0.000640084	NA	0.524852	FALSE	FALSE	FALSE	0.00153224	0.68	TRUE	17	48379615	0.0170421	4.18013e-06	21.5828
childhood absence epilepsy || id:ieu-b-13	ebi-a-GCST90017074	genus Turicibacter id.2162	rs12603364	T	C	T	C	0.110861	-0.00042255	NA	0.121068	FALSE	FALSE	FALSE	0.0023486	0.86	TRUE	17	43117476	0.0225598	8.66603e-07	24.1483
childhood absence epilepsy || id:ieu-b-13	ebi-a-GCST90017074	genus Turicibacter id.2162	rs149744580	A	G	A	G	0.169883	-0.00182769	NA	0.0516464	FALSE	FALSE	FALSE	0.00352557	0.6	TRUE	2	63366962	0.0315478	7.00971e-08	28.9976
childhood absence epilepsy || id:ieu-b-13	ebi-a-GCST90017074	genus Turicibacter id.2162	rs2834977	T	C	T	C	-0.0959995	-0.00215749	NA	0.150441	FALSE	FALSE	FALSE	0.00216044	0.32	TRUE	21	36929643	0.0208261	3.95585e-06	21.2482
childhood absence epilepsy || id:ieu-b-13	ebi-a-GCST90017074	genus Turicibacter id.2162	rs2952020	A	G	A	G	0.0759019	0.00368857	NA	0.728159	FALSE	FALSE	FALSE	0.00174095	0.0340001	TRUE	8	26027842	0.0165764	5.63313e-06	20.9664
childhood absence epilepsy || id:ieu-b-13	ebi-a-GCST90017074	genus Turicibacter id.2162	rs3734633	G	A	G	A	-0.120957	-0.00374406	NA	0.0764802	FALSE	FALSE	FALSE	0.00291334	0.2	TRUE	6	126111881	0.02683	5.31912e-06	20.3245
childhood absence epilepsy || id:ieu-b-13	ebi-a-GCST90017074	genus Turicibacter id.2162	rs55756211	T	C	T	C	-0.115115	0.00508211	NA	0.0983785	FALSE	FALSE	FALSE	0.00262452	0.0530005	TRUE	7	130972179	0.0240708	2.8053e-06	22.8709
childhood absence epilepsy || id:ieu-b-13	ebi-a-GCST90016961	genus Akkermansia id.4037	rs117107102	A	G	A	G	0.204406	0.00027616	NA	0.0324577	FALSE	FALSE	FALSE	0.00438483	0.95	TRUE	18	49473635	0.0431629	3.01141e-06	22.4267
childhood absence epilepsy || id:ieu-b-13	ebi-a-GCST90016961	genus Akkermansia id.4037	rs11729256	T	C	T	C	0.0750473	0.00133243	NA	0.24506	FALSE	FALSE	FALSE	0.00178557	0.46	TRUE	4	95027272	0.0150184	6.58385e-07	24.9702
childhood absence epilepsy || id:ieu-b-13	ebi-a-GCST90016961	genus Akkermansia id.4037	rs12908520	G	A	G	A	0.061772	0.00237686	NA	0.442542	FALSE	FALSE	FALSE	0.0015538	0.13	TRUE	15	97570657	0.0130954	2.2648e-06	22.2508
childhood absence epilepsy || id:ieu-b-13	ebi-a-GCST90016961	genus Akkermansia id.4037	rs4936098	G	A	G	A	-0.0649225	0.00092994	NA	0.635886	FALSE	FALSE	FALSE	0.00162725	0.57	TRUE	11	130280667	0.0135934	1.1036e-06	22.8105
childhood absence epilepsy || id:ieu-b-13	ebi-a-GCST90016961	genus Akkermansia id.4037	rs61779207	G	A	G	A	-0.0760539	-0.000978528	NA	0.184396	FALSE	FALSE	FALSE	0.00199653	0.62	TRUE	1	41074472	0.0167769	6.32121e-06	20.5504
childhood absence epilepsy || id:ieu-b-13	ebi-a-GCST90016961	genus Akkermansia id.4037	rs74542928	T	C	T	C	0.112623	0.000439203	NA	0.0949238	FALSE	FALSE	FALSE	0.00262694	0.87	TRUE	4	100544188	0.0236434	1.4802e-06	22.69
childhood absence epilepsy || id:ieu-b-13	ebi-a-GCST90016961	genus Akkermansia id.4037	rs9349825	A	G	A	G	-0.0703407	-0.00239208	NA	0.267495	FALSE	FALSE	FALSE	0.00175039	0.17	TRUE	6	56341481	0.0147133	2.59884e-06	22.8556
childhood absence epilepsy || id:ieu-b-13	ebi-a-GCST90016961	genus Akkermansia id.4037	rs941682	G	A	G	A	-0.0632957	-0.00055634	NA	0.279344	FALSE	FALSE	FALSE	0.00172307	0.75	TRUE	20	31867840	0.0143777	9.17128e-06	19.3807
childhood absence epilepsy || id:ieu-b-13	ebi-a-GCST90016964	genus Alloprevotella id.961	rs12675596	G	T	G	T	0.145669	0.00384619	NA	0.244857	FALSE	FALSE	FALSE	0.001799	0.0329997	TRUE	8	69994816	0.0290678	9.63718e-07	25.1137
childhood absence epilepsy || id:ieu-b-13	ebi-a-GCST90016964	genus Alloprevotella id.961	rs2154444	G	T	G	T	-0.138234	0.000113809	NA	0.788866	FALSE	FALSE	FALSE	0.00187675	0.95	TRUE	21	36053643	0.0308961	8.36758e-06	20.0181
childhood absence epilepsy || id:ieu-b-13	ebi-a-GCST90016964	genus Alloprevotella id.961	rs34619204	G	A	G	A	-0.156037	-0.0023546	NA	0.186832	FALSE	FALSE	FALSE	0.00200077	0.24	TRUE	21	40993008	0.0344392	8.84199e-06	20.5281
childhood absence epilepsy || id:ieu-b-13	ebi-a-GCST90016964	genus Alloprevotella id.961	rs4364940	A	G	A	G	0.126418	-0.00056679	NA	0.269489	FALSE	FALSE	FALSE	0.0017457	0.75	TRUE	1	234126516	0.0282207	8.58361e-06	20.067
childhood absence epilepsy || id:ieu-b-13	ebi-a-GCST90016964	genus Alloprevotella id.961	rs4680035	G	A	G	A	0.119599	0.00013984	NA	0.46526	FALSE	FALSE	FALSE	0.00153614	0.93	TRUE	3	152805600	0.0259446	4.99057e-06	21.2501
childhood absence epilepsy || id:ieu-b-13	ebi-a-GCST90016964	genus Alloprevotella id.961	rs58212166	A	G	A	G	-0.161506	-0.0012843	NA	0.137969	FALSE	FALSE	FALSE	0.00224828	0.57	TRUE	4	189076705	0.0359102	7.93615e-06	20.2275
childhood absence epilepsy || id:ieu-b-13	ebi-a-GCST90016968	genus Bacteroides id.918	rs11585893	A	G	A	G	-0.0740746	0.00265051	NA	0.142238	FALSE	FALSE	FALSE	0.00224219	0.24	TRUE	1	10644351	0.0147633	1.79511e-06	25.1751
childhood absence epilepsy || id:ieu-b-13	ebi-a-GCST90016968	genus Bacteroides id.918	rs1340391	T	C	T	C	-0.0592004	0.00134073	NA	0.195054	FALSE	FALSE	FALSE	0.00192974	0.49	TRUE	1	102960989	0.0132244	6.73008e-06	20.04
childhood absence epilepsy || id:ieu-b-13	ebi-a-GCST90016968	genus Bacteroides id.918	rs17619981	T	G	T	G	0.0880978	-0.00131809	NA	0.0946088	FALSE	FALSE	FALSE	0.00263557	0.62	TRUE	19	24342250	0.0187002	2.68683e-06	22.1941
childhood absence epilepsy || id:ieu-b-13	ebi-a-GCST90016968	genus Bacteroides id.918	rs6795673	C	T	C	T	0.0538565	-0.00233529	NA	0.437978	FALSE	FALSE	FALSE	0.00154168	0.13	TRUE	3	10593224	0.0105251	3.37909e-07	26.1833
childhood absence epilepsy || id:ieu-b-13	ebi-a-GCST90016968	genus Bacteroides id.918	rs9507307	C	T	C	T	0.0604456	0.000327171	NA	0.191172	FALSE	FALSE	FALSE	0.00197749	0.87	TRUE	13	24910476	0.0129128	2.12711e-06	21.9123
childhood absence epilepsy || id:ieu-b-13	ebi-a-GCST90016969	genus Barnesiella id.944	rs11155559	T	C	T	C	0.0956023	0.00163079	NA	0.0832344	FALSE	FALSE	FALSE	0.00280796	0.56	TRUE	6	148601905	0.0212961	8.91908e-06	20.1529
childhood absence epilepsy || id:ieu-b-13	ebi-a-GCST90016969	genus Barnesiella id.944	rs12909713	C	T	C	T	-0.0550716	-0.000205552	NA	0.447557	FALSE	FALSE	FALSE	0.00155794	0.9	TRUE	15	87145913	0.0120039	4.94527e-06	21.048
childhood absence epilepsy || id:ieu-b-13	ebi-a-GCST90016969	genus Barnesiella id.944	rs199035	G	A	G	A	0.0559495	0.000566438	NA	0.516074	FALSE	FALSE	FALSE	0.00154682	0.709999	TRUE	6	23435415	0.0119716	3.00296e-06	21.8418
childhood absence epilepsy || id:ieu-b-13	ebi-a-GCST90016969	genus Barnesiella id.944	rs72684847	T	C	T	C	-0.114369	-0.00284021	NA	0.0574395	FALSE	FALSE	FALSE	0.00332614	0.39	TRUE	4	102616869	0.0253873	6.76176e-06	20.2947
childhood absence epilepsy || id:ieu-b-13	ebi-a-GCST90016969	genus Barnesiella id.944	rs76181748	C	T	C	T	-0.0778559	-0.00165961	NA	0.139384	FALSE	FALSE	FALSE	0.00225141	0.46	TRUE	8	105458416	0.017164	6.77657e-06	20.5753
childhood absence epilepsy || id:ieu-b-13	ebi-a-GCST90016969	genus Barnesiella id.944	rs79795328	A	G	A	G	-0.0818645	0.00058497	NA	0.12855	FALSE	FALSE	FALSE	0.00228763	0.8	TRUE	4	114546595	0.0176441	4.23302e-06	21.5274
childhood absence epilepsy || id:ieu-b-13	ebi-a-GCST90016973	genus Butyricicoccus id.2055	rs10084203	G	A	G	A	-0.0549699	-0.00313978	NA	0.757429	FALSE	FALSE	FALSE	0.00178504	0.0790005	TRUE	2	191304149	0.0123563	8.58638e-06	19.7912
childhood absence epilepsy || id:ieu-b-13	ebi-a-GCST90016973	genus Butyricicoccus id.2055	rs12034718	G	A	G	A	-0.0701199	-0.00253468	NA	0.849076	FALSE	FALSE	FALSE	0.00217279	0.24	TRUE	1	67379595	0.0158213	9.57679e-06	19.6426
childhood absence epilepsy || id:ieu-b-13	ebi-a-GCST90016973	genus Butyricicoccus id.2055	rs12585793	T	C	T	C	-0.262206	-0.000307524	NA	0.0426029	FALSE	FALSE	FALSE	0.00381388	0.94	TRUE	13	27018240	0.0564729	5.79189e-06	21.5578
childhood absence epilepsy || id:ieu-b-13	ebi-a-GCST90016973	genus Butyricicoccus id.2055	rs56221232	T	C	T	C	0.0828027	0.000473988	NA	0.112828	FALSE	FALSE	FALSE	0.00244143	0.85	TRUE	2	153453410	0.0167401	7.61939e-07	24.4666
childhood absence epilepsy || id:ieu-b-13	ebi-a-GCST90016973	genus Butyricicoccus id.2055	rs7322368	C	T	C	T	-0.0815733	-0.00101922	NA	0.907703	FALSE	FALSE	FALSE	0.00264412	0.7	TRUE	13	100213990	0.0183167	5.51785e-06	19.8336
childhood absence epilepsy || id:ieu-b-13	ebi-a-GCST90016974	genus Butyricimonas id.945	rs11228830	A	G	A	G	0.135265	0.000537338	NA	0.0662043	FALSE	FALSE	FALSE	0.00310599	0.86	TRUE	11	56664962	0.0298411	6.55164e-06	20.5467
childhood absence epilepsy || id:ieu-b-13	ebi-a-GCST90016974	genus Butyricimonas id.945	rs113054641	G	A	G	A	-0.144881	-0.00267337	NA	0.0692755	FALSE	FALSE	FALSE	0.00303974	0.38	TRUE	21	16550389	0.0274574	1.73696e-07	27.8422
childhood absence epilepsy || id:ieu-b-13	ebi-a-GCST90016974	genus Butyricimonas id.945	rs12458763	A	C	A	C	0.122037	-0.00327	NA	0.070703	FALSE	FALSE	FALSE	0.00296956	0.27	TRUE	18	34091618	0.0269587	6.36649e-06	20.492
childhood absence epilepsy || id:ieu-b-13	ebi-a-GCST90016974	genus Butyricimonas id.945	rs1862649	G	A	G	A	0.113124	-0.000564949	NA	0.0836981	FALSE	FALSE	FALSE	0.00283701	0.84	TRUE	16	22172866	0.0248176	4.76255e-06	20.7773
childhood absence epilepsy || id:ieu-b-13	ebi-a-GCST90016974	genus Butyricimonas id.945	rs2114713	G	T	G	T	0.062721	0.000188352	NA	0.426476	FALSE	FALSE	FALSE	0.00155939	0.9	TRUE	15	80528373	0.0138998	6.87717e-06	20.3615
childhood absence epilepsy || id:ieu-b-13	ebi-a-GCST90016974	genus Butyricimonas id.945	rs7083431	A	C	A	C	0.0703539	0.000648656	NA	0.343807	FALSE	FALSE	FALSE	0.00162953	0.69	TRUE	10	72711156	0.0144439	8.85462e-07	23.7251
childhood absence epilepsy || id:ieu-b-13	ebi-a-GCST90016974	genus Butyricimonas id.945	rs71428626	G	T	G	T	-0.133188	0.00399612	NA	0.0676632	FALSE	FALSE	FALSE	0.00307989	0.19	TRUE	2	83093264	0.0289905	4.80408e-06	21.1066
childhood absence epilepsy || id:ieu-b-13	ebi-a-GCST90016974	genus Butyricimonas id.945	rs72814525	A	G	A	G	0.0664154	0.00338425	NA	0.305777	FALSE	FALSE	FALSE	0.00167773	0.0439997	TRUE	10	72443070	0.0149766	8.24594e-06	19.6658
childhood absence epilepsy || id:ieu-b-13	ebi-a-GCST90016974	genus Butyricimonas id.945	rs9657374	C	T	C	T	0.0680719	0.00147934	NA	0.306477	FALSE	FALSE	FALSE	0.00166904	0.38	TRUE	8	4834406	0.0148172	4.5036e-06	21.1059
childhood absence epilepsy || id:ieu-b-13	ebi-a-GCST90016980	genus Clostridium sensustricto1 id.1873	rs116847295	C	T	C	T	0.110021	-0.000154244	NA	0.062646	FALSE	FALSE	FALSE	0.00318912	0.96	TRUE	12	43485015	0.0246032	4.58121e-06	19.9971
childhood absence epilepsy || id:ieu-b-13	ebi-a-GCST90016980	genus Clostridium sensustricto1 id.1873	rs12341505	G	A	G	A	0.0810718	0.00185658	NA	0.1257	FALSE	FALSE	FALSE	0.00232926	0.43	TRUE	9	136710881	0.0180121	4.8217e-06	20.2587
childhood absence epilepsy || id:ieu-b-13	ebi-a-GCST90016983	genus Coprococcus1 id.11301	rs1519491	T	C	T	C	0.0499197	-8.78152e-05	NA	0.405263	FALSE	FALSE	FALSE	0.00155891	0.96	TRUE	2	22079770	0.0113558	8.95282e-06	19.3245
childhood absence epilepsy || id:ieu-b-13	ebi-a-GCST90016983	genus Coprococcus1 id.11301	rs1576241	A	G	A	G	-0.0510343	0.0042374	NA	0.456708	FALSE	FALSE	FALSE	0.00153688	0.00580003	TRUE	6	72529277	0.0109535	3.32859e-06	21.7079
childhood absence epilepsy || id:ieu-b-13	ebi-a-GCST90016983	genus Coprococcus1 id.11301	rs4277593	G	A	G	A	-0.0585649	-4.55793e-05	NA	0.490352	FALSE	FALSE	FALSE	0.0015425	0.98	TRUE	20	4319420	0.0109914	1.1397e-07	28.3902
childhood absence epilepsy || id:ieu-b-13	ebi-a-GCST90016983	genus Coprococcus1 id.11301	rs73167075	T	C	T	C	0.0573137	0.00085148	NA	0.236658	FALSE	FALSE	FALSE	0.00180741	0.64	TRUE	3	165693143	0.0127573	8.5686e-06	20.1836
childhood absence epilepsy || id:ieu-b-13	ebi-a-GCST90016983	genus Coprococcus1 id.11301	rs74101919	T	C	T	C	-0.0718988	-0.000145218	NA	0.178541	FALSE	FALSE	FALSE	0.00201462	0.94	TRUE	1	95424321	0.0144651	1.0329e-06	24.7059
childhood absence epilepsy || id:ieu-b-13	ebi-a-GCST90016984	genus Coprococcus2 id.11302	rs10070053	A	G	A	G	0.0594312	-0.00168823	NA	0.408562	FALSE	FALSE	FALSE	0.00156436	0.28	TRUE	5	34794789	0.0135375	7.64874e-06	19.2731
childhood absence epilepsy || id:ieu-b-13	ebi-a-GCST90016984	genus Coprococcus2 id.11302	rs35890118	A	G	A	G	-0.066536	-0.00253796	NA	0.27477	FALSE	FALSE	FALSE	0.0017373	0.14	TRUE	10	129715759	0.0147661	8.25962e-06	20.304
childhood absence epilepsy || id:ieu-b-13	ebi-a-GCST90016984	genus Coprococcus2 id.11302	rs6677933	C	T	C	T	-0.0804405	-0.00122481	NA	0.20668	FALSE	FALSE	FALSE	0.00190337	0.52	TRUE	1	112139008	0.0164216	1.185e-06	23.9949
childhood absence epilepsy || id:ieu-b-13	ebi-a-GCST90016984	genus Coprococcus2 id.11302	rs9426473	A	G	A	G	0.0727361	-0.000583689	NA	0.223053	FALSE	FALSE	FALSE	0.00184855	0.75	TRUE	1	4210455	0.0161662	6.30681e-06	20.2434
childhood absence epilepsy || id:ieu-b-13	ebi-a-GCST90016994	genus Erysipelotrichaceae UCG003 id.11384	rs75949021	T	C	T	C	-0.169667	-0.00213697	NA	0.0483432	FALSE	FALSE	FALSE	0.00360354	0.55	TRUE	2	175403951	0.0374238	3.57511e-06	20.5541
childhood absence epilepsy || id:ieu-b-13	ebi-a-GCST90017000	genus Eubacterium hallii group id.11338	rs10501370	C	T	C	T	-0.115589	-0.00297871	NA	0.0514294	FALSE	FALSE	FALSE	0.00347911	0.39	TRUE	11	58040621	0.0252489	5.41914e-06	20.9579
childhood absence epilepsy || id:ieu-b-13	ebi-a-GCST90017000	genus Eubacterium hallii group id.11338	rs10798999	C	T	C	T	0.0601661	-0.00111573	NA	0.225229	FALSE	FALSE	FALSE	0.001848	0.55	TRUE	1	34308917	0.0126752	2.60555e-06	22.5317
childhood absence epilepsy || id:ieu-b-13	ebi-a-GCST90017000	genus Eubacterium hallii group id.11338	rs10808115	C	A	C	A	0.0504747	-0.00150557	NA	0.528867	FALSE	FALSE	FALSE	0.00155095	0.33	TRUE	7	100635375	0.0109922	4.42446e-06	21.0852
childhood absence epilepsy || id:ieu-b-13	ebi-a-GCST90017000	genus Eubacterium hallii group id.11338	rs117748144	T	C	T	C	-0.126582	-0.00321715	NA	0.0511063	FALSE	FALSE	FALSE	0.00351279	0.36	TRUE	11	11771637	0.028712	7.85995e-06	19.4365
childhood absence epilepsy || id:ieu-b-13	ebi-a-GCST90017000	genus Eubacterium hallii group id.11338	rs281379	A	G	A	G	-0.0499523	-0.00300264	NA	0.495492	FALSE	FALSE	FALSE	0.00154242	0.0519996	TRUE	19	49214274	0.0112153	9.32803e-06	19.8376
childhood absence epilepsy || id:ieu-b-13	ebi-a-GCST90017000	genus Eubacterium hallii group id.11338	rs74018587	C	T	C	T	0.208943	0.00774318	NA	0.0304912	FALSE	FALSE	FALSE	0.00446077	0.0830004	TRUE	15	62014160	0.043822	3.70254e-06	22.7338
childhood absence epilepsy || id:ieu-b-13	ebi-a-GCST90017000	genus Eubacterium hallii group id.11338	rs78056098	G	T	G	T	-0.0507411	0.000823268	NA	0.363514	FALSE	FALSE	FALSE	0.00160894	0.61	TRUE	11	123789877	0.0113758	8.2882e-06	19.8955
childhood absence epilepsy || id:ieu-b-13	ebi-a-GCST90017000	genus Eubacterium hallii group id.11338	rs949971	T	G	T	G	-0.0540164	1.40078e-05	NA	0.369633	FALSE	FALSE	FALSE	0.00159679	0.99	TRUE	3	110283389	0.0116101	3.29003e-06	21.6461
childhood absence epilepsy || id:ieu-b-13	ebi-a-GCST90017001	genus Eubacterium nodatum group id.11297	rs10263623	C	T	C	T	0.193496	-0.00071152	NA	0.0969907	FALSE	FALSE	FALSE	0.00260288	0.780001	TRUE	7	64894137	0.0439023	8.90697e-06	19.4254
childhood absence epilepsy || id:ieu-b-13	ebi-a-GCST90017001	genus Eubacterium nodatum group id.11297	rs11006576	A	G	A	G	-0.110167	-0.00191449	NA	0.500081	FALSE	FALSE	FALSE	0.00152934	0.21	TRUE	10	61322015	0.024593	7.98656e-06	20.0669
childhood absence epilepsy || id:ieu-b-13	ebi-a-GCST90017001	genus Eubacterium nodatum group id.11297	rs34297067	A	G	A	G	-0.186907	-0.00456448	NA	0.14683	FALSE	FALSE	FALSE	0.00217271	0.0359998	TRUE	14	52185888	0.0341475	6.59781e-08	29.9594
childhood absence epilepsy || id:ieu-b-13	ebi-a-GCST90017001	genus Eubacterium nodatum group id.11297	rs61841040	G	T	G	T	0.160621	-0.00174983	NA	0.156031	FALSE	FALSE	FALSE	0.00214348	0.41	TRUE	10	9659749	0.0341609	3.56139e-06	22.1078
childhood absence epilepsy || id:ieu-b-13	ebi-a-GCST90017001	genus Eubacterium nodatum group id.11297	rs77910827	C	T	C	T	0.201788	-0.00287584	NA	0.0930848	FALSE	FALSE	FALSE	0.00268033	0.28	TRUE	9	96597985	0.0413568	9.05378e-07	23.8066
childhood absence epilepsy || id:ieu-b-13	ebi-a-GCST90017001	genus Eubacterium nodatum group id.11297	rs7827125	C	T	C	T	0.1223	-0.000157795	NA	0.278712	FALSE	FALSE	FALSE	0.00174759	0.93	TRUE	8	4954912	0.0271331	7.17348e-06	20.3167
childhood absence epilepsy || id:ieu-b-13	ebi-a-GCST90017001	genus Eubacterium nodatum group id.11297	rs7880204	T	C	T	C	-0.125454	0.000468758	NA	0.265433	FALSE	FALSE	FALSE	0.00175889	0.79	TRUE	1	171060821	0.0275303	6.8388e-06	20.7657
childhood absence epilepsy || id:ieu-b-13	ebi-a-GCST90017001	genus Eubacterium nodatum group id.11297	rs9425984	T	C	T	C	-0.130234	0.000919487	NA	0.235158	FALSE	FALSE	FALSE	0.0018124	0.61	TRUE	1	34529736	0.0292347	7.20676e-06	19.845
childhood absence epilepsy || id:ieu-b-13	ebi-a-GCST90017002	genus Eubacterium oxidoreducens group id.11339	rs12129908	A	C	A	C	-0.0893273	-0.000585115	NA	0.582749	FALSE	FALSE	FALSE	0.00156335	0.709999	TRUE	1	195064019	0.0198333	5.79522e-06	20.2852
childhood absence epilepsy || id:ieu-b-13	ebi-a-GCST90017002	genus Eubacterium oxidoreducens group id.11339	rs2973294	G	T	G	T	0.0923559	0.00353641	NA	0.437841	FALSE	FALSE	FALSE	0.00153907	0.0219999	TRUE	4	37526679	0.0195439	2.38836e-06	22.3309
childhood absence epilepsy || id:ieu-b-13	ebi-a-GCST90017005	genus Eubacterium ventriosum group id.11341	rs12964517	G	A	G	A	0.0587198	-0.00285055	NA	0.31844	FALSE	FALSE	FALSE	0.00164666	0.0830004	TRUE	18	22460785	0.0123453	2.07501e-06	22.6238
childhood absence epilepsy || id:ieu-b-13	ebi-a-GCST90017005	genus Eubacterium ventriosum group id.11341	rs13082419	C	T	C	T	-0.0715522	0.00369841	NA	0.152241	FALSE	FALSE	FALSE	0.00215435	0.0860003	TRUE	3	107736434	0.016137	9.55983e-06	19.6608
childhood absence epilepsy || id:ieu-b-13	ebi-a-GCST90017005	genus Eubacterium ventriosum group id.11341	rs35179274	C	T	C	T	-0.0627263	-0.00263156	NA	0.232806	FALSE	FALSE	FALSE	0.00181575	0.15	TRUE	14	51960625	0.013786	5.75798e-06	20.7025
childhood absence epilepsy || id:ieu-b-13	ebi-a-GCST90017005	genus Eubacterium ventriosum group id.11341	rs3809430	T	C	T	C	-0.0548171	0.00186712	NA	0.366787	FALSE	FALSE	FALSE	0.0015881	0.24	TRUE	14	44975510	0.0118426	3.5532e-06	21.4258
childhood absence epilepsy || id:ieu-b-13	ebi-a-GCST90017005	genus Eubacterium ventriosum group id.11341	rs66746423	C	T	C	T	0.0751501	0.0010714	NA	0.15119	FALSE	FALSE	FALSE	0.00214334	0.62	TRUE	1	109398264	0.0164978	6.11139e-06	20.7495
childhood absence epilepsy || id:ieu-b-13	ebi-a-GCST90017005	genus Eubacterium ventriosum group id.11341	rs6704822	G	A	G	A	-0.0739179	0.0026344	NA	0.868314	FALSE	FALSE	FALSE	0.00224057	0.24	TRUE	2	203661779	0.0166705	6.62232e-06	19.6608
childhood absence epilepsy || id:ieu-b-13	ebi-a-GCST90017005	genus Eubacterium ventriosum group id.11341	rs72783037	C	A	C	A	0.0658926	-0.00219792	NA	0.196405	FALSE	FALSE	FALSE	0.00194121	0.26	TRUE	16	60348381	0.0143747	6.54757e-06	21.0124
childhood absence epilepsy || id:ieu-b-13	ebi-a-GCST90017005	genus Eubacterium ventriosum group id.11341	rs73849225	T	C	T	C	0.0975711	-0.00275308	NA	0.0677877	FALSE	FALSE	FALSE	0.0030542	0.37	TRUE	4	126371814	0.0224388	5.20907e-06	18.9079
childhood absence epilepsy || id:ieu-b-13	ebi-a-GCST90017006	genus Eubacterium xylanophilum group id.14375	rs13239072	G	A	G	A	0.0687427	-0.00024881	NA	0.246598	FALSE	FALSE	FALSE	0.00179838	0.89	TRUE	7	43566344	0.0142728	1.81782e-06	23.1972
childhood absence epilepsy || id:ieu-b-13	ebi-a-GCST90017006	genus Eubacterium xylanophilum group id.14375	rs1999224	G	T	G	T	-0.0949051	-0.00503786	NA	0.0986834	FALSE	FALSE	FALSE	0.00256874	0.05	TRUE	9	130498120	0.0203503	3.75491e-06	21.7489
childhood absence epilepsy || id:ieu-b-13	ebi-a-GCST90017006	genus Eubacterium xylanophilum group id.14375	rs2012708	G	A	G	A	-0.0573202	0.000391027	NA	0.640195	FALSE	FALSE	FALSE	0.00160323	0.81	TRUE	16	84790559	0.0126905	6.52544e-06	20.4013
childhood absence epilepsy || id:ieu-b-13	ebi-a-GCST90017008	genus Family XIII AD3011 group id.11293	rs12812672	T	C	T	C	-0.096065	-0.00125057	NA	0.0862484	FALSE	FALSE	FALSE	0.00273216	0.649999	TRUE	12	18127597	0.020828	2.55806e-06	21.2733
childhood absence epilepsy || id:ieu-b-13	ebi-a-GCST90017008	genus Family XIII AD3011 group id.11293	rs149302	T	C	T	C	-0.0645635	-0.00261655	NA	0.206455	FALSE	FALSE	FALSE	0.00192878	0.17	TRUE	5	14159925	0.0143225	7.48187e-06	20.3206
childhood absence epilepsy || id:ieu-b-13	ebi-a-GCST90017008	genus Family XIII AD3011 group id.11293	rs16840310	G	A	G	A	0.0608052	0.000232309	NA	0.625981	FALSE	FALSE	FALSE	0.00158593	0.88	TRUE	1	240694163	0.0122149	6.75118e-07	24.78
childhood absence epilepsy || id:ieu-b-13	ebi-a-GCST90017008	genus Family XIII AD3011 group id.11293	rs16940167	C	T	C	T	0.0732552	0.00190786	NA	0.157236	FALSE	FALSE	FALSE	0.00211784	0.37	TRUE	15	58683697	0.0159898	3.90841e-06	20.989
childhood absence epilepsy || id:ieu-b-13	ebi-a-GCST90017008	genus Family XIII AD3011 group id.11293	rs17156849	G	A	G	A	-0.112891	-0.00114897	NA	0.0715871	FALSE	FALSE	FALSE	0.00301355	0.7	TRUE	7	28603985	0.0245292	4.1917e-06	21.1813
childhood absence epilepsy || id:ieu-b-13	ebi-a-GCST90017008	genus Family XIII AD3011 group id.11293	rs739451	C	T	C	T	0.0649589	-7.52152e-05	NA	0.199117	FALSE	FALSE	FALSE	0.00192451	0.97	TRUE	9	136678954	0.0147534	7.87807e-06	19.3862
childhood absence epilepsy || id:ieu-b-13	ebi-a-GCST90017009	genus Family XIII UCG001 id.11294	rs12049454	T	C	T	C	-0.0647298	-0.000205949	NA	0.318283	FALSE	FALSE	FALSE	0.00165579	0.9	TRUE	1	85228325	0.0134065	1.17379e-06	23.3119
childhood absence epilepsy || id:ieu-b-13	ebi-a-GCST90017009	genus Family XIII UCG001 id.11294	rs1426266	C	T	C	T	0.0665521	0.000404522	NA	0.705537	FALSE	FALSE	FALSE	0.00169981	0.81	TRUE	3	188224096	0.0137151	1.24934e-06	23.5465
childhood absence epilepsy || id:ieu-b-13	ebi-a-GCST90017009	genus Family XIII UCG001 id.11294	rs62414802	C	T	C	T	-0.0611904	0.00102214	NA	0.329693	FALSE	FALSE	FALSE	0.00164009	0.53	TRUE	6	76598635	0.013457	4.29181e-06	20.6762
childhood absence epilepsy || id:ieu-b-13	ebi-a-GCST90017009	genus Family XIII UCG001 id.11294	rs76463770	A	G	A	G	0.19313	0.00432383	NA	0.0448068	FALSE	FALSE	FALSE	0.0037165	0.24	TRUE	3	45479090	0.0419866	3.77477e-06	21.1582
childhood absence epilepsy || id:ieu-b-13	ebi-a-GCST90017013	genus Haemophilus id.3698	rs10781340	A	G	A	G	-0.0948915	-0.00627353	NA	0.838445	FALSE	FALSE	FALSE	0.00209249	0.00269998	TRUE	9	78752170	0.0203221	4.32265e-06	21.8031
childhood absence epilepsy || id:ieu-b-13	ebi-a-GCST90017013	genus Haemophilus id.3698	rs9895850	T	C	T	C	-0.192957	-0.00697558	NA	0.0444997	FALSE	FALSE	FALSE	0.00371074	0.0599998	TRUE	17	64535013	0.0416755	2.14062e-06	21.4368
childhood absence epilepsy || id:ieu-b-13	ebi-a-GCST90017015	genus Holdemania id.2157	rs12701617	A	G	A	G	-0.0660617	4.0076e-05	NA	0.432605	FALSE	FALSE	FALSE	0.00154933	0.98	TRUE	7	38292857	0.0149427	9.51853e-06	19.5453
childhood absence epilepsy || id:ieu-b-13	ebi-a-GCST90017015	genus Holdemania id.2157	rs1867876	T	C	T	C	0.0842919	0.00154092	NA	0.287096	FALSE	FALSE	FALSE	0.00171091	0.37	TRUE	11	18768068	0.0162192	2.7388e-07	27.0093
childhood absence epilepsy || id:ieu-b-13	ebi-a-GCST90017015	genus Holdemania id.2157	rs4146507	C	T	C	T	0.079488	0.000355642	NA	0.228312	FALSE	FALSE	FALSE	0.00185581	0.85	TRUE	5	106209093	0.0177002	7.2297e-06	20.1673
childhood absence epilepsy || id:ieu-b-13	ebi-a-GCST90017015	genus Holdemania id.2157	rs80149660	C	T	C	T	-0.232987	-0.00266234	NA	0.0558253	FALSE	FALSE	FALSE	0.00334329	0.43	TRUE	10	129908282	0.0519183	6.04213e-06	20.1383
childhood absence epilepsy || id:ieu-b-13	ebi-a-GCST90017015	genus Holdemania id.2157	rs9500080	C	T	C	T	0.0926764	-0.000444446	NA	0.220216	FALSE	FALSE	FALSE	0.00185702	0.81	TRUE	6	105737322	0.0178886	4.08517e-07	26.8402
childhood absence epilepsy || id:ieu-b-13	ebi-a-GCST90017015	genus Holdemania id.2157	rs9529719	C	T	C	T	-0.074038	0.000776471	NA	0.688354	FALSE	FALSE	FALSE	0.00165996	0.64	TRUE	13	70856516	0.0160494	5.96664e-06	21.281
childhood absence epilepsy || id:ieu-b-13	ebi-a-GCST90017018	genus Intestinibacter id.11345	rs11109097	T	C	T	C	-0.0624272	0.00324855	NA	0.683856	FALSE	FALSE	FALSE	0.00165584	0.05	TRUE	12	97928437	0.0138539	5.4949e-06	20.305
childhood absence epilepsy || id:ieu-b-13	ebi-a-GCST90017018	genus Intestinibacter id.11345	rs118030283	G	A	G	A	-0.151829	0.00556658	NA	0.0508165	FALSE	FALSE	FALSE	0.00350168	0.11	TRUE	16	5993076	0.0324471	2.67436e-06	21.8956
childhood absence epilepsy || id:ieu-b-13	ebi-a-GCST90017018	genus Intestinibacter id.11345	rs16938435	T	C	T	C	-0.112189	-0.000606969	NA	0.0713052	FALSE	FALSE	FALSE	0.00297351	0.84	TRUE	9	21502923	0.0235439	1.80098e-06	22.7062
childhood absence epilepsy || id:ieu-b-13	ebi-a-GCST90017018	genus Intestinibacter id.11345	rs2702387	G	A	G	A	-0.0608559	-0.00019991	NA	0.655276	FALSE	FALSE	FALSE	0.00162042	0.9	TRUE	4	179361262	0.0132145	4.25991e-06	21.2082
childhood absence epilepsy || id:ieu-b-13	ebi-a-GCST90017018	genus Intestinibacter id.11345	rs4327025	G	A	G	A	-0.0810346	0.000715786	NA	0.212892	FALSE	FALSE	FALSE	0.00187864	0.7	TRUE	15	92446683	0.0154397	1.64327e-07	27.5463
childhood absence epilepsy || id:ieu-b-13	ebi-a-GCST90017018	genus Intestinibacter id.11345	rs447950	A	G	A	G	0.0628342	-0.000192787	NA	0.310955	FALSE	FALSE	FALSE	0.00166535	0.91	TRUE	5	148846426	0.0136652	5.6391e-06	21.1427
childhood absence epilepsy || id:ieu-b-13	ebi-a-GCST90017018	genus Intestinibacter id.11345	rs478972	C	T	C	T	0.142681	-0.00176728	NA	0.946735	FALSE	FALSE	FALSE	0.00341364	0.6	TRUE	11	125663184	0.0297116	1.81991e-06	23.0611
childhood absence epilepsy || id:ieu-b-13	ebi-a-GCST90017018	genus Intestinibacter id.11345	rs62430350	T	C	T	C	0.151096	0.00193968	NA	0.0531021	FALSE	FALSE	FALSE	0.00343234	0.57	TRUE	6	170918194	0.0351476	6.84227e-06	18.4805
childhood absence epilepsy || id:ieu-b-13	ebi-a-GCST90017018	genus Intestinibacter id.11345	rs6875660	C	T	C	T	0.0890455	0.00608857	NA	0.116654	FALSE	FALSE	FALSE	0.00237721	0.01	TRUE	5	159686256	0.0193905	3.05781e-06	21.0885
childhood absence epilepsy || id:ieu-b-13	ebi-a-GCST90017020	genus Lachnoclostridium id.11308	rs12566975	T	C	T	C	-0.0468097	0.000130291	NA	0.489625	FALSE	FALSE	FALSE	0.0015364	0.93	TRUE	1	185091351	0.0105787	9.57194e-06	19.5797
childhood absence epilepsy || id:ieu-b-13	ebi-a-GCST90017020	genus Lachnoclostridium id.11308	rs1528479	A	G	A	G	0.0497799	-0.000353508	NA	0.655612	FALSE	FALSE	FALSE	0.00165042	0.83	TRUE	2	167244051	0.0111919	9.63984e-06	19.7834
childhood absence epilepsy || id:ieu-b-13	ebi-a-GCST90017020	genus Lachnoclostridium id.11308	rs1997204	C	T	C	T	0.108075	-0.00277238	NA	0.948511	FALSE	FALSE	FALSE	0.00346244	0.42	TRUE	12	102046595	0.0242022	5.97077e-06	19.9407
childhood absence epilepsy || id:ieu-b-13	ebi-a-GCST90017020	genus Lachnoclostridium id.11308	rs3821998	C	A	C	A	-0.0864066	-0.00011662	NA	0.0824976	FALSE	FALSE	FALSE	0.00279547	0.97	TRUE	4	38694566	0.0192519	6.72048e-06	20.144
childhood absence epilepsy || id:ieu-b-13	ebi-a-GCST90017020	genus Lachnoclostridium id.11308	rs4738679	A	G	A	G	0.0520267	0.000846478	NA	0.655815	FALSE	FALSE	FALSE	0.00161801	0.6	TRUE	8	59370320	0.011404	4.41754e-06	20.8132
childhood absence epilepsy || id:ieu-b-13	ebi-a-GCST90017020	genus Lachnoclostridium id.11308	rs6112314	A	C	A	C	-0.0561715	0.00268835	NA	0.391152	FALSE	FALSE	FALSE	0.00156962	0.0870001	TRUE	20	19300846	0.0108174	2.43215e-07	26.9641
childhood absence epilepsy || id:ieu-b-13	ebi-a-GCST90017020	genus Lachnoclostridium id.11308	rs615997	T	C	T	C	0.0511752	8.74478e-05	NA	0.483458	FALSE	FALSE	FALSE	0.00155134	0.96	TRUE	3	23037786	0.0106491	2.0268e-06	23.0937
childhood absence epilepsy || id:ieu-b-13	ebi-a-GCST90017020	genus Lachnoclostridium id.11308	rs72829893	G	T	G	T	0.117472	0.000958183	NA	0.0508992	FALSE	FALSE	FALSE	0.00351594	0.79	TRUE	17	46694541	0.0268103	5.57763e-06	19.1984
childhood absence epilepsy || id:ieu-b-13	ebi-a-GCST90017020	genus Lachnoclostridium id.11308	rs789029	C	T	C	T	-0.0641288	-0.000492024	NA	0.17817	FALSE	FALSE	FALSE	0.00200331	0.81	TRUE	18	1053252	0.0137974	3.75327e-06	21.6029
childhood absence epilepsy || id:ieu-b-13	ebi-a-GCST90017022	genus Lachnospiraceae NC2004 group id.11316	rs12208226	C	A	C	A	-0.154739	0.00287446	NA	0.0813093	FALSE	FALSE	FALSE	0.0028081	0.31	TRUE	6	22725908	0.0340372	9.74833e-06	20.6677
childhood absence epilepsy || id:ieu-b-13	ebi-a-GCST90017022	genus Lachnospiraceae NC2004 group id.11316	rs12863463	G	A	G	A	-0.156365	-0.00285362	NA	0.0743626	FALSE	FALSE	FALSE	0.00290321	0.33	TRUE	13	47512191	0.0345372	6.03976e-06	20.4977
childhood absence epilepsy || id:ieu-b-13	ebi-a-GCST90017022	genus Lachnospiraceae NC2004 group id.11316	rs17067076	G	A	G	A	-0.154631	-0.000838786	NA	0.0565377	FALSE	FALSE	FALSE	0.00332886	0.8	TRUE	18	58229086	0.0352194	5.61203e-06	19.2765
childhood absence epilepsy || id:ieu-b-13	ebi-a-GCST90017022	genus Lachnospiraceae NC2004 group id.11316	rs1928659	T	C	T	C	0.102522	-0.000524333	NA	0.236158	FALSE	FALSE	FALSE	0.00182104	0.77	TRUE	9	29334137	0.0226445	6.17234e-06	20.4979
childhood absence epilepsy || id:ieu-b-13	ebi-a-GCST90017022	genus Lachnospiraceae NC2004 group id.11316	rs1929743	T	C	T	C	0.0837206	-0.00382407	NA	0.339504	FALSE	FALSE	FALSE	0.00162675	0.0189998	TRUE	13	76829562	0.0190318	9.05503e-06	19.3511
childhood absence epilepsy || id:ieu-b-13	ebi-a-GCST90017022	genus Lachnospiraceae NC2004 group id.11316	rs3756315	A	G	A	G	-0.0883469	0.00116446	NA	0.328426	FALSE	FALSE	FALSE	0.00165795	0.48	TRUE	5	149544722	0.0188397	3.32583e-06	21.9905
childhood absence epilepsy || id:ieu-b-13	ebi-a-GCST90017022	genus Lachnospiraceae NC2004 group id.11316	rs6116753	G	A	G	A	0.0994748	-0.00187544	NA	0.24417	FALSE	FALSE	FALSE	0.0017983	0.3	TRUE	20	5330700	0.0209139	2.92247e-06	22.6233
childhood absence epilepsy || id:ieu-b-13	ebi-a-GCST90017024	genus Lachnospiraceae NK4A136 group id.11319	rs160061	G	A	G	A	-0.0513831	0.00280178	NA	0.512627	FALSE	FALSE	FALSE	0.00154449	0.0700003	TRUE	5	6116659	0.0108094	2.12197e-06	22.5963
childhood absence epilepsy || id:ieu-b-13	ebi-a-GCST90017024	genus Lachnospiraceae NK4A136 group id.11319	rs28540839	A	C	A	C	0.0508285	-0.00200472	NA	0.488579	FALSE	FALSE	FALSE	0.00155732	0.2	TRUE	8	84735080	0.0110591	9.34329e-06	21.1239
childhood absence epilepsy || id:ieu-b-13	ebi-a-GCST90017024	genus Lachnospiraceae NK4A136 group id.11319	rs2880566	T	C	T	C	0.0599578	-0.0022449	NA	0.200271	FALSE	FALSE	FALSE	0.00194844	0.25	TRUE	17	30016653	0.0134693	5.61423e-06	19.8153
childhood absence epilepsy || id:ieu-b-13	ebi-a-GCST90017024	genus Lachnospiraceae NK4A136 group id.11319	rs59805249	T	C	T	C	0.0936162	-0.00144568	NA	0.0628302	FALSE	FALSE	FALSE	0.00317793	0.649999	TRUE	5	90289997	0.0207982	9.45388e-06	20.2605
childhood absence epilepsy || id:ieu-b-13	ebi-a-GCST90017024	genus Lachnospiraceae NK4A136 group id.11319	rs68104925	T	C	T	C	-0.0549104	-0.00246742	NA	0.356338	FALSE	FALSE	FALSE	0.00161302	0.13	TRUE	14	100177681	0.0115385	2.36777e-06	22.647
childhood absence epilepsy || id:ieu-b-13	ebi-a-GCST90017024	genus Lachnospiraceae NK4A136 group id.11319	rs7073658	G	T	G	T	0.0499621	0.000135175	NA	0.597594	FALSE	FALSE	FALSE	0.00156537	0.93	TRUE	10	62175024	0.0109693	5.26914e-06	20.7455
childhood absence epilepsy || id:ieu-b-13	ebi-a-GCST90017024	genus Lachnospiraceae NK4A136 group id.11319	rs7616165	G	T	G	T	-0.230542	-0.0108031	NA	0.0412499	FALSE	FALSE	FALSE	0.00387246	0.00530005	TRUE	3	190415145	0.0483465	2.77389e-06	22.7389
childhood absence epilepsy || id:ieu-b-13	ebi-a-GCST90017024	genus Lachnospiraceae NK4A136 group id.11319	rs76193507	A	G	A	G	-0.22973	-0.000977229	NA	0.0483903	FALSE	FALSE	FALSE	0.00357628	0.780001	TRUE	3	161749981	0.0499776	2.93089e-06	21.1293
childhood absence epilepsy || id:ieu-b-13	ebi-a-GCST90017024	genus Lachnospiraceae NK4A136 group id.11319	rs7832116	A	G	A	G	-0.0714756	0.00120416	NA	0.144122	FALSE	FALSE	FALSE	0.00219483	0.58	TRUE	8	4842929	0.0151703	3.57084e-06	22.1987
childhood absence epilepsy || id:ieu-b-13	ebi-a-GCST90017024	genus Lachnospiraceae NK4A136 group id.11319	rs954878	A	G	A	G	-0.0520656	-0.00250902	NA	0.441677	FALSE	FALSE	FALSE	0.00154012	0.1	TRUE	1	54578401	0.0109082	1.78201e-06	22.7822
childhood absence epilepsy || id:ieu-b-13	ebi-a-GCST90017031	genus Lactococcus id.1851	rs10417872	G	T	G	T	-0.118306	0.00173568	NA	0.723945	FALSE	FALSE	FALSE	0.00170876	0.31	TRUE	19	28767353	0.024522	1.28677e-06	23.2756
childhood absence epilepsy || id:ieu-b-13	ebi-a-GCST90017031	genus Lactococcus id.1851	rs12621813	G	A	G	A	0.108423	-7.08574e-05	NA	0.303437	FALSE	FALSE	FALSE	0.00167977	0.97	TRUE	2	31266049	0.0239978	6.6083e-06	20.4127
childhood absence epilepsy || id:ieu-b-13	ebi-a-GCST90017031	genus Lactococcus id.1851	rs2293361	C	T	C	T	-0.199221	-0.00442619	NA	0.062828	FALSE	FALSE	FALSE	0.00315998	0.16	TRUE	2	54114864	0.0430969	1.39592e-06	21.3687
childhood absence epilepsy || id:ieu-b-13	ebi-a-GCST90017031	genus Lactococcus id.1851	rs4766997	C	T	C	T	0.114599	-0.00244923	NA	0.307899	FALSE	FALSE	FALSE	0.00167453	0.14	TRUE	12	113161438	0.023839	2.06144e-06	23.1092
childhood absence epilepsy || id:ieu-b-13	ebi-a-GCST90017031	genus Lactococcus id.1851	rs55910161	C	T	C	T	0.146426	-0.00449259	NA	0.152969	FALSE	FALSE	FALSE	0.00217049	0.0379997	TRUE	10	71518643	0.0307367	2.36211e-06	22.6946
childhood absence epilepsy || id:ieu-b-13	ebi-a-GCST90017031	genus Lactococcus id.1851	rs6674304	C	T	C	T	0.200758	0.00441581	NA	0.0681663	FALSE	FALSE	FALSE	0.00304928	0.15	TRUE	1	116887742	0.0442121	6.1776e-06	20.6188
childhood absence epilepsy || id:ieu-b-13	ebi-a-GCST90017033	genus Methanobrevibacter id.123	rs10202904	G	T	G	T	0.112811	-0.00339672	NA	0.577454	FALSE	FALSE	FALSE	0.00155454	0.0290001	TRUE	2	125440268	0.0239106	3.08546e-06	22.2598
childhood absence epilepsy || id:ieu-b-13	ebi-a-GCST90017033	genus Methanobrevibacter id.123	rs6776814	T	C	T	C	-0.188956	-0.0029106	NA	0.0905988	FALSE	FALSE	FALSE	0.00268246	0.28	TRUE	3	15053083	0.0419905	8.04896e-06	20.2497
childhood absence epilepsy || id:ieu-b-13	ebi-a-GCST90017033	genus Methanobrevibacter id.123	rs76029318	T	C	T	C	0.222849	0.000483498	NA	0.0690955	FALSE	FALSE	FALSE	0.00303859	0.87	TRUE	13	41963791	0.0454319	1.07552e-06	24.0602
childhood absence epilepsy || id:ieu-b-13	ebi-a-GCST90017033	genus Methanobrevibacter id.123	rs894996	C	A	C	A	0.214213	-0.00103535	NA	0.0771305	FALSE	FALSE	FALSE	0.00288544	0.719999	TRUE	4	104418307	0.0456045	3.81566e-06	22.0636
childhood absence epilepsy || id:ieu-b-13	ebi-a-GCST90017034	genus Odoribacter id.952	rs28417404	A	G	A	G	-0.0726896	-0.00283941	NA	0.156425	FALSE	FALSE	FALSE	0.00211843	0.18	TRUE	14	70944224	0.0161372	3.68036e-06	20.2903
childhood absence epilepsy || id:ieu-b-13	ebi-a-GCST90017034	genus Odoribacter id.952	rs4793970	A	G	A	G	-0.0576329	0.000611605	NA	0.289126	FALSE	FALSE	FALSE	0.00170781	0.719999	TRUE	17	46763962	0.0129154	6.02698e-06	19.9125
childhood absence epilepsy || id:ieu-b-13	ebi-a-GCST90017034	genus Odoribacter id.952	rs77779484	G	A	G	A	-0.133489	-0.00680551	NA	0.0558302	FALSE	FALSE	FALSE	0.00333159	0.0409996	TRUE	12	67655943	0.0268526	6.56251e-07	24.7126
childhood absence epilepsy || id:ieu-b-13	ebi-a-GCST90017037	genus Oscillospira id.2064	rs12206468	G	A	G	A	-0.133016	-0.0022139	NA	0.0747512	FALSE	FALSE	FALSE	0.00290741	0.450001	TRUE	6	18093691	0.0269733	1.04222e-06	24.3187
childhood absence epilepsy || id:ieu-b-13	ebi-a-GCST90017037	genus Oscillospira id.2064	rs12925026	T	C	T	C	0.13559	-0.0045324	NA	0.0796969	FALSE	FALSE	FALSE	0.00285431	0.11	TRUE	16	89792856	0.030678	9.31022e-06	19.5345
childhood absence epilepsy || id:ieu-b-13	ebi-a-GCST90017037	genus Oscillospira id.2064	rs28889936	A	C	A	C	0.114051	-0.000561825	NA	0.082848	FALSE	FALSE	FALSE	0.00280018	0.84	TRUE	4	89483300	0.0252838	3.36589e-06	20.3476
childhood absence epilepsy || id:ieu-b-13	ebi-a-GCST90017037	genus Oscillospira id.2064	rs751183	C	T	C	T	0.0774322	-0.000192727	NA	0.782811	FALSE	FALSE	FALSE	0.00188478	0.92	TRUE	1	76803093	0.0172216	6.85125e-06	20.216
childhood absence epilepsy || id:ieu-b-13	ebi-a-GCST90017038	genus Oxalobacter id.2978	rs10464997	G	A	G	A	0.137691	0.00125809	NA	0.139314	FALSE	FALSE	FALSE	0.00225925	0.58	TRUE	8	20902693	0.0294804	3.29754e-06	21.8145
childhood absence epilepsy || id:ieu-b-13	ebi-a-GCST90017038	genus Oxalobacter id.2978	rs1569853	T	C	T	C	-0.138078	-0.00146522	NA	0.148186	FALSE	FALSE	FALSE	0.0021773	0.5	TRUE	6	38550301	0.0296981	3.64502e-06	21.6168
childhood absence epilepsy || id:ieu-b-13	ebi-a-GCST90017038	genus Oxalobacter id.2978	rs36057338	G	T	G	T	0.207847	-0.00326485	NA	0.0677536	FALSE	FALSE	FALSE	0.00307354	0.29	TRUE	4	189935314	0.0421439	8.79812e-07	24.3231
childhood absence epilepsy || id:ieu-b-13	ebi-a-GCST90017038	genus Oxalobacter id.2978	rs4428215	G	A	G	A	0.130293	0.00175691	NA	0.232229	FALSE	FALSE	FALSE	0.00182412	0.34	TRUE	3	171947435	0.0242237	7.51069e-08	28.9309
childhood absence epilepsy || id:ieu-b-13	ebi-a-GCST90017038	genus Oxalobacter id.2978	rs6993398	G	A	G	A	0.127217	-0.000308286	NA	0.149064	FALSE	FALSE	FALSE	0.00215495	0.89	TRUE	8	115560689	0.0278855	7.12771e-06	20.8129
childhood absence epilepsy || id:ieu-b-13	ebi-a-GCST90017038	genus Oxalobacter id.2978	rs736744	T	C	T	C	-0.117882	-0.000641078	NA	0.597195	FALSE	FALSE	FALSE	0.00158351	0.69	TRUE	9	87514407	0.0211262	2.57472e-08	31.1352
childhood absence epilepsy || id:ieu-b-13	ebi-a-GCST90017044	genus Prevotella7 id.11182	rs118038478	A	G	A	G	0.205676	-0.00479304	NA	0.0763599	FALSE	FALSE	FALSE	0.0029256	0.1	TRUE	16	47237609	0.0468917	7.85416e-06	19.2387
childhood absence epilepsy || id:ieu-b-13	ebi-a-GCST90017044	genus Prevotella7 id.11182	rs2240542	C	T	C	T	0.12085	0.00238237	NA	0.285702	FALSE	FALSE	FALSE	0.00172524	0.17	TRUE	2	242066314	0.0261776	4.8415e-06	21.3125
childhood absence epilepsy || id:ieu-b-13	ebi-a-GCST90017044	genus Prevotella7 id.11182	rs57404562	C	A	C	A	0.155486	-0.00113737	NA	0.183894	FALSE	FALSE	FALSE	0.00199182	0.57	TRUE	2	12101762	0.0316057	6.2157e-07	24.202
childhood absence epilepsy || id:ieu-b-13	ebi-a-GCST90017044	genus Prevotella7 id.11182	rs79263163	A	C	A	C	-0.143982	-0.00304081	NA	0.164267	FALSE	FALSE	FALSE	0.00206773	0.14	TRUE	11	39821773	0.031501	7.51052e-06	20.8914
childhood absence epilepsy || id:ieu-b-13	ebi-a-GCST90017044	genus Prevotella7 id.11182	rs9959718	G	A	G	A	0.133012	-0.00252667	NA	0.240565	FALSE	FALSE	FALSE	0.00180037	0.16	TRUE	18	71442664	0.0275361	1.9006e-06	23.3333
childhood absence epilepsy || id:ieu-b-13	ebi-a-GCST90017048	genus Roseburia id.2012	rs2943022	T	C	T	C	0.0493786	0.00232026	NA	0.447088	FALSE	FALSE	FALSE	0.00153617	0.13	TRUE	5	89598914	0.0106763	4.11405e-06	21.3912
childhood absence epilepsy || id:ieu-b-13	ebi-a-GCST90017048	genus Roseburia id.2012	rs302266	T	C	T	C	-0.0777312	0.00254909	NA	0.112731	FALSE	FALSE	FALSE	0.00243266	0.29	TRUE	1	194183650	0.0172985	8.12587e-06	20.1917
childhood absence epilepsy || id:ieu-b-13	ebi-a-GCST90017048	genus Roseburia id.2012	rs329182	T	C	T	C	0.0690327	0.000241835	NA	0.137542	FALSE	FALSE	FALSE	0.00224014	0.91	TRUE	5	125076494	0.0152884	5.90147e-06	20.3885
childhood absence epilepsy || id:ieu-b-13	ebi-a-GCST90017048	genus Roseburia id.2012	rs57466170	C	T	C	T	0.0741405	-3.33923e-05	NA	0.0833608	FALSE	FALSE	FALSE	0.00283376	0.99	TRUE	15	37859065	0.0171601	8.30099e-06	18.6669
childhood absence epilepsy || id:ieu-b-13	ebi-a-GCST90017048	genus Roseburia id.2012	rs6445851	A	G	A	G	0.0497336	-0.000382293	NA	0.598258	FALSE	FALSE	FALSE	0.00157212	0.81	TRUE	3	57116228	0.0108158	3.5272e-06	21.1438
childhood absence epilepsy || id:ieu-b-13	ebi-a-GCST90017048	genus Roseburia id.2012	rs6930661	C	T	C	T	-0.0961587	0.00977191	NA	0.0732808	FALSE	FALSE	FALSE	0.0029743	0.001	TRUE	6	12774611	0.0204975	2.47942e-06	22.0077
childhood absence epilepsy || id:ieu-b-13	ebi-a-GCST90017048	genus Roseburia id.2012	rs75326254	C	T	C	T	-0.104628	0.000111304	NA	0.0592373	FALSE	FALSE	FALSE	0.00327547	0.97	TRUE	6	166170836	0.0230897	7.50205e-06	20.5333
childhood absence epilepsy || id:ieu-b-13	ebi-a-GCST90017048	genus Roseburia id.2012	rs78753150	A	C	A	C	0.0968739	-0.00426441	NA	0.0611786	FALSE	FALSE	FALSE	0.0032142	0.18	TRUE	5	144135655	0.0214067	9.98321e-06	20.4793
childhood absence epilepsy || id:ieu-b-13	ebi-a-GCST90017048	genus Roseburia id.2012	rs9300744	C	T	C	T	-0.0588452	-0.000505985	NA	0.235644	FALSE	FALSE	FALSE	0.00180168	0.780001	TRUE	13	103117486	0.0126228	4.75116e-06	21.7325
childhood absence epilepsy || id:ieu-b-13	ebi-a-GCST90017049	genus Ruminiclostridium5 id.11355	rs10827477	A	G	A	G	-0.0547387	-0.000951969	NA	0.317329	FALSE	FALSE	FALSE	0.00167343	0.57	TRUE	10	35262588	0.0115163	2.1918e-06	22.5924
childhood absence epilepsy || id:ieu-b-13	ebi-a-GCST90017049	genus Ruminiclostridium5 id.11355	rs113753996	T	C	T	C	0.0820689	0.00375468	NA	0.10612	FALSE	FALSE	FALSE	0.0024822	0.13	TRUE	5	32477664	0.0174463	3.98896e-06	22.1284
childhood absence epilepsy || id:ieu-b-13	ebi-a-GCST90017049	genus Ruminiclostridium5 id.11355	rs1223978	C	T	C	T	-0.0484169	0.000380106	NA	0.538405	FALSE	FALSE	FALSE	0.00155825	0.81	TRUE	13	108775162	0.0108254	8.16188e-06	20.0035
childhood absence epilepsy || id:ieu-b-13	ebi-a-GCST90017049	genus Ruminiclostridium5 id.11355	rs1492620	T	C	T	C	-0.0830505	-0.00603395	NA	0.0897084	FALSE	FALSE	FALSE	0.002696	0.025	TRUE	6	50405920	0.0180073	3.52574e-06	21.271
childhood absence epilepsy || id:ieu-b-13	ebi-a-GCST90017049	genus Ruminiclostridium5 id.11355	rs2791343	T	C	T	C	0.051717	0.00255709	NA	0.337807	FALSE	FALSE	FALSE	0.00163127	0.12	TRUE	8	131316030	0.0113369	5.53962e-06	20.8103
childhood absence epilepsy || id:ieu-b-13	ebi-a-GCST90017049	genus Ruminiclostridium5 id.11355	rs2833828	G	A	G	A	0.0489617	-0.00132705	NA	0.432562	FALSE	FALSE	FALSE	0.00155322	0.39	TRUE	21	33811886	0.0108702	6.81648e-06	20.2879
childhood absence epilepsy || id:ieu-b-13	ebi-a-GCST90017049	genus Ruminiclostridium5 id.11355	rs4955951	A	G	A	G	-0.0713749	-0.00300151	NA	0.108742	FALSE	FALSE	FALSE	0.00247712	0.23	TRUE	3	55243531	0.0165826	9.9552e-06	18.5262
childhood absence epilepsy || id:ieu-b-13	ebi-a-GCST90017049	genus Ruminiclostridium5 id.11355	rs79968837	A	G	A	G	-0.0950311	0.00182391	NA	0.0740306	FALSE	FALSE	FALSE	0.00294806	0.54	TRUE	20	41177956	0.0193507	1.14623e-06	24.1178
childhood absence epilepsy || id:ieu-b-13	ebi-a-GCST90017059	genus Ruminococcaceae UCG011 id.11368	rs10274562	C	T	C	T	0.110917	0.00216207	NA	0.347872	FALSE	FALSE	FALSE	0.00162171	0.18	TRUE	7	11222521	0.0244556	6.49606e-06	20.5703
childhood absence epilepsy || id:ieu-b-13	ebi-a-GCST90017059	genus Ruminococcaceae UCG011 id.11368	rs12636310	G	A	G	A	0.132725	-0.000503876	NA	0.222342	FALSE	FALSE	FALSE	0.00185435	0.79	TRUE	3	185469491	0.0282037	2.81235e-06	22.1459
childhood absence epilepsy || id:ieu-b-13	ebi-a-GCST90017059	genus Ruminococcaceae UCG011 id.11368	rs12724320	C	T	C	T	-0.120881	-0.000269281	NA	0.318545	FALSE	FALSE	FALSE	0.00164513	0.87	TRUE	1	179370499	0.0249229	1.51985e-06	23.5244
childhood absence epilepsy || id:ieu-b-13	ebi-a-GCST90017059	genus Ruminococcaceae UCG011 id.11368	rs1416041	A	C	A	C	-0.182339	0.000835593	NA	0.137964	FALSE	FALSE	FALSE	0.00222528	0.709999	TRUE	6	105073676	0.0339898	7.04417e-08	28.7781
childhood absence epilepsy || id:ieu-b-13	ebi-a-GCST90017059	genus Ruminococcaceae UCG011 id.11368	rs2729556	T	C	T	C	0.109097	0.00120771	NA	0.469726	FALSE	FALSE	FALSE	0.00157693	0.44	TRUE	7	111763988	0.0233699	3.18676e-06	21.7927
childhood absence epilepsy || id:ieu-b-13	ebi-a-GCST90017059	genus Ruminococcaceae UCG011 id.11368	rs4490371	T	C	T	C	-0.111816	-0.000902028	NA	0.334609	FALSE	FALSE	FALSE	0.00164559	0.58	TRUE	3	76205107	0.0248963	7.74622e-06	20.1715
childhood absence epilepsy || id:ieu-b-13	ebi-a-GCST90017059	genus Ruminococcaceae UCG011 id.11368	rs9729514	G	A	G	A	-0.184934	-0.0038046	NA	0.904051	FALSE	FALSE	FALSE	0.00259637	0.14	TRUE	1	219901055	0.0394616	2.36772e-06	21.9626
childhood absence epilepsy || id:ieu-b-13	ebi-a-GCST90017060	genus Ruminococcaceae UCG013 id.11370	rs16918863	A	C	A	C	0.111491	-0.00653075	NA	0.0614366	FALSE	FALSE	FALSE	0.0032188	0.0420001	TRUE	10	19780463	0.0240157	4.15499e-06	21.5521
childhood absence epilepsy || id:ieu-b-13	ebi-a-GCST90017060	genus Ruminococcaceae UCG013 id.11370	rs2730183	G	A	G	A	-0.0488692	-0.00075353	NA	0.466591	FALSE	FALSE	FALSE	0.00154857	0.630001	TRUE	8	40311885	0.0109907	8.43782e-06	19.7706
childhood absence epilepsy || id:ieu-b-13	ebi-a-GCST90017060	genus Ruminococcaceae UCG013 id.11370	rs4385846	T	G	T	G	-0.0598404	0.00260178	NA	0.774906	FALSE	FALSE	FALSE	0.00184397	0.16	TRUE	10	115650278	0.0131807	6.46205e-06	20.6116
childhood absence epilepsy || id:ieu-b-13	ebi-a-GCST90017060	genus Ruminococcaceae UCG013 id.11370	rs76973485	G	T	G	T	0.194976	-0.0044262	NA	0.0464743	FALSE	FALSE	FALSE	0.00364852	0.23	TRUE	3	9534657	0.0418213	3.34981e-06	21.7354
childhood absence epilepsy || id:ieu-b-13	ebi-a-GCST90017060	genus Ruminococcaceae UCG013 id.11370	rs7784330	A	G	A	G	0.0498329	0.0010509	NA	0.607179	FALSE	FALSE	FALSE	0.00158144	0.51	TRUE	7	32530997	0.0112066	8.16263e-06	19.7735
childhood absence epilepsy || id:ieu-b-13	ebi-a-GCST90017061	genus Ruminococcaceae UCG014 id.11371	rs10495392	T	C	T	C	0.082486	0.00283833	NA	0.880877	FALSE	FALSE	FALSE	0.00233848	0.22	TRUE	1	237422989	0.0187194	9.96323e-06	19.4168
childhood absence epilepsy || id:ieu-b-13	ebi-a-GCST90017061	genus Ruminococcaceae UCG014 id.11371	rs12638134	T	G	T	G	0.0582548	-0.000417798	NA	0.404791	FALSE	FALSE	FALSE	0.00156441	0.79	TRUE	3	101334609	0.0119657	1.21143e-06	23.7021
childhood absence epilepsy || id:ieu-b-13	ebi-a-GCST90017061	genus Ruminococcaceae UCG014 id.11371	rs72809222	T	C	T	C	0.0671775	-0.000677467	NA	0.252618	FALSE	FALSE	FALSE	0.00178148	0.7	TRUE	2	57205854	0.0139838	2.4119e-06	23.078
childhood absence epilepsy || id:ieu-b-13	ebi-a-GCST90017061	genus Ruminococcaceae UCG014 id.11371	rs73186226	G	A	G	A	-0.0993852	0.000288069	NA	0.0825299	FALSE	FALSE	FALSE	0.00280225	0.92	TRUE	3	123829361	0.0216819	6.71754e-06	21.0111
childhood absence epilepsy || id:ieu-b-13	ebi-a-GCST90017061	genus Ruminococcaceae UCG014 id.11371	rs853612	A	G	A	G	-0.0528257	0.00250725	NA	0.406991	FALSE	FALSE	FALSE	0.0015685	0.11	TRUE	10	119928413	0.0119367	9.75461e-06	19.5849
childhood absence epilepsy || id:ieu-b-13	ebi-a-GCST90017061	genus Ruminococcaceae UCG014 id.11371	rs995642	C	T	C	T	0.060048	0.000988767	NA	0.309709	FALSE	FALSE	FALSE	0.00165465	0.55	TRUE	2	134854659	0.0126417	1.90222e-06	22.5624
childhood absence epilepsy || id:ieu-b-13	ebi-a-GCST90017064	genus Ruminococcus gauvreauii group id.11342	rs10931481	A	G	A	G	-0.0610096	0.00124444	NA	0.690052	FALSE	FALSE	FALSE	0.00166	0.450001	TRUE	2	191954852	0.0130484	3.38213e-06	21.8616
childhood absence epilepsy || id:ieu-b-13	ebi-a-GCST90017064	genus Ruminococcus gauvreauii group id.11342	rs12079579	A	G	A	G	0.0955324	-0.00346462	NA	0.0841183	FALSE	FALSE	FALSE	0.00276539	0.21	TRUE	1	161880482	0.0213436	5.03721e-06	20.0339
childhood absence epilepsy || id:ieu-b-13	ebi-a-GCST90017064	genus Ruminococcus gauvreauii group id.11342	rs1391597	C	T	C	T	0.0590284	-0.00192441	NA	0.412514	FALSE	FALSE	FALSE	0.00157364	0.22	TRUE	12	61119266	0.0124874	1.85964e-06	22.3449
childhood absence epilepsy || id:ieu-b-13	ebi-a-GCST90017064	genus Ruminococcus gauvreauii group id.11342	rs2047242	A	G	A	G	-0.067603	0.0002639	NA	0.307671	FALSE	FALSE	FALSE	0.00168382	0.88	TRUE	10	29201860	0.0133738	2.46371e-07	25.5518
childhood absence epilepsy || id:ieu-b-13	ebi-a-GCST90017064	genus Ruminococcus gauvreauii group id.11342	rs2166943	C	A	C	A	-0.0566974	0.000334378	NA	0.564007	FALSE	FALSE	FALSE	0.00156118	0.83	TRUE	8	137090850	0.0123497	5.27716e-06	21.0772
childhood absence epilepsy || id:ieu-b-13	ebi-a-GCST90017064	genus Ruminococcus gauvreauii group id.11342	rs289410	A	G	A	G	0.0654926	0.00374116	NA	0.748965	FALSE	FALSE	FALSE	0.00177768	0.0350002	TRUE	15	85563483	0.0139101	2.27463e-06	22.1679
childhood absence epilepsy || id:ieu-b-13	ebi-a-GCST90017064	genus Ruminococcus gauvreauii group id.11342	rs431418	G	A	G	A	0.094737	0.0028444	NA	0.90115	FALSE	FALSE	FALSE	0.00257285	0.27	TRUE	5	166419552	0.0210157	5.53669e-06	20.3213
childhood absence epilepsy || id:ieu-b-13	ebi-a-GCST90017064	genus Ruminococcus gauvreauii group id.11342	rs73802842	C	A	C	A	0.0736808	-0.00278366	NA	0.151332	FALSE	FALSE	FALSE	0.00213978	0.19	TRUE	4	18824860	0.0169665	7.48032e-06	18.8592
childhood absence epilepsy || id:ieu-b-13	ebi-a-GCST90017064	genus Ruminococcus gauvreauii group id.11342	rs9870933	G	A	G	A	-0.0621643	0.00175204	NA	0.620753	FALSE	FALSE	FALSE	0.00158459	0.27	TRUE	3	112372317	0.0126072	8.49122e-07	24.3134
childhood absence epilepsy || id:ieu-b-13	ebi-a-GCST90017070	genus Streptococcus id.1853	rs10028567	C	T	C	T	-0.0921167	0.00135616	NA	0.0883323	FALSE	FALSE	FALSE	0.00270596	0.62	TRUE	4	53657577	0.0191881	7.30348e-06	23.0469
childhood absence epilepsy || id:ieu-b-13	ebi-a-GCST90017070	genus Streptococcus id.1853	rs10448310	A	G	A	G	-0.0517935	0.000724886	NA	0.433355	FALSE	FALSE	FALSE	0.00154734	0.64	TRUE	9	93556174	0.0111324	3.30704e-06	21.6458
childhood absence epilepsy || id:ieu-b-13	ebi-a-GCST90017070	genus Streptococcus id.1853	rs11110281	T	C	T	C	-0.137519	0.00244053	NA	0.0614274	FALSE	FALSE	FALSE	0.00318908	0.44	TRUE	12	100584014	0.0227398	2.58315e-09	36.5723
childhood absence epilepsy || id:ieu-b-13	ebi-a-GCST90017070	genus Streptococcus id.1853	rs11720390	G	A	G	A	0.107024	-0.00449139	NA	0.0747732	FALSE	FALSE	FALSE	0.00293061	0.13	TRUE	3	94103591	0.0228121	3.59484e-06	22.0106
childhood absence epilepsy || id:ieu-b-13	ebi-a-GCST90017070	genus Streptococcus id.1853	rs11764382	A	G	A	G	-0.0695345	-0.00300287	NA	0.179517	FALSE	FALSE	FALSE	0.002011	0.14	TRUE	7	46774896	0.0143671	1.28632e-06	23.4241
childhood absence epilepsy || id:ieu-b-13	ebi-a-GCST90017070	genus Streptococcus id.1853	rs17708276	A	G	A	G	-0.0793955	-0.00345805	NA	0.130035	FALSE	FALSE	FALSE	0.00228536	0.13	TRUE	8	10199548	0.0170628	3.04096e-06	21.6517
childhood absence epilepsy || id:ieu-b-13	ebi-a-GCST90017070	genus Streptococcus id.1853	rs1918540	A	G	A	G	-0.059639	0.0071539	NA	0.739936	FALSE	FALSE	FALSE	0.00177287	5.49997e-05	TRUE	11	131649446	0.0128148	2.44068e-06	21.6589
childhood absence epilepsy || id:ieu-b-13	ebi-a-GCST90017070	genus Streptococcus id.1853	rs4968759	A	G	A	G	-0.0515109	0.000952366	NA	0.440218	FALSE	FALSE	FALSE	0.00155312	0.54	TRUE	17	61298020	0.0112068	3.7812e-06	21.1269
childhood absence epilepsy || id:ieu-b-13	ebi-a-GCST90017070	genus Streptococcus id.1853	rs57646748	G	A	G	A	-0.0907696	-0.00619268	NA	0.0692951	FALSE	FALSE	FALSE	0.00304249	0.0420001	TRUE	4	37452858	0.0200344	5.47545e-06	20.5271
childhood absence epilepsy || id:ieu-b-13	ebi-a-GCST90017070	genus Streptococcus id.1853	rs6806351	T	C	T	C	-0.0633829	-0.000534061	NA	0.226904	FALSE	FALSE	FALSE	0.00185778	0.77	TRUE	3	132058723	0.0136647	4.93867e-06	21.5151
childhood absence epilepsy || id:ieu-b-13	ebi-a-GCST90017070	genus Streptococcus id.1853	rs7916711	A	G	A	G	0.102891	-0.00545446	NA	0.0625902	FALSE	FALSE	FALSE	0.00315723	0.0840001	TRUE	10	28588269	0.0217362	2.717e-06	22.4072
childhood absence epilepsy || id:ieu-b-13	ebi-a-GCST90017075	genus Tyzzerella3 id.11335	rs10898797	C	T	C	T	0.12238	0.00473805	NA	0.148991	FALSE	FALSE	FALSE	0.00216154	0.0280001	TRUE	11	87588698	0.0274683	8.85442e-06	19.8499
childhood absence epilepsy || id:ieu-b-13	ebi-a-GCST90017075	genus Tyzzerella3 id.11335	rs4904512	T	C	T	C	-0.117151	-0.000164814	NA	0.174312	FALSE	FALSE	FALSE	0.00203112	0.94	TRUE	14	89595945	0.0250306	3.09272e-06	21.9053
childhood absence epilepsy || id:ieu-b-13	ebi-a-GCST90017075	genus Tyzzerella3 id.11335	rs6920448	C	T	C	T	-0.141081	0.00407761	NA	0.115875	FALSE	FALSE	FALSE	0.00241866	0.0920005	TRUE	6	5755626	0.0305446	4.15375e-06	21.3338
childhood absence epilepsy || id:ieu-b-13	ebi-a-GCST90017075	genus Tyzzerella3 id.11335	rs7333521	T	C	T	C	-0.207191	-0.00370568	NA	0.0529464	FALSE	FALSE	FALSE	0.00340154	0.28	TRUE	13	81593016	0.0453121	4.87607e-06	20.908
childhood absence epilepsy || id:ieu-b-13	ebi-a-GCST90017075	genus Tyzzerella3 id.11335	rs7561370	C	T	C	T	-0.131341	0.000215626	NA	0.880007	FALSE	FALSE	FALSE	0.00234414	0.93	TRUE	2	57810406	0.0286292	1.51604e-06	21.0466
childhood absence epilepsy || id:ieu-b-13	ebi-a-GCST90017088	genus Veillonella id.2198	rs1882878	A	G	A	G	-0.0768966	0.00142642	NA	0.273841	FALSE	FALSE	FALSE	0.00173743	0.41	TRUE	21	30010673	0.0163908	2.98092e-06	22.0097
childhood absence epilepsy || id:ieu-b-13	ebi-a-GCST90017088	genus Veillonella id.2198	rs2013594	C	T	C	T	0.0720698	6.07398e-05	NA	0.656301	FALSE	FALSE	FALSE	0.00162577	0.97	TRUE	11	44302154	0.0155153	3.42129e-06	21.5768
childhood absence epilepsy || id:ieu-b-13	ebi-a-GCST90017089	genus Victivallis id.2256	rs11899949	G	A	G	A	0.130568	0.00169981	NA	0.261044	FALSE	FALSE	FALSE	0.00177427	0.34	TRUE	2	38049069	0.0276239	2.76707e-06	22.341
childhood absence epilepsy || id:ieu-b-13	ebi-a-GCST90017089	genus Victivallis id.2256	rs173120	C	T	C	T	-0.13381	0.000543873	NA	0.763835	FALSE	FALSE	FALSE	0.00180733	0.760001	TRUE	13	72876881	0.0290127	7.65244e-06	21.2716
childhood absence epilepsy || id:ieu-b-13	ebi-a-GCST90017089	genus Victivallis id.2256	rs1882775	A	G	A	G	-0.13827	-0.00112	NA	0.194889	FALSE	FALSE	FALSE	0.0019845	0.57	TRUE	21	40405606	0.031273	8.72831e-06	19.5487
childhood absence epilepsy || id:ieu-b-13	ebi-a-GCST90017089	genus Victivallis id.2256	rs2546432	C	T	C	T	0.110803	-0.00261856	NA	0.530508	FALSE	FALSE	FALSE	0.00154929	0.0909997	TRUE	5	180579462	0.0249655	9.93276e-06	19.698
childhood absence epilepsy || id:ieu-b-13	ebi-a-GCST90017089	genus Victivallis id.2256	rs4764863	G	A	G	A	0.121561	-0.0016711	NA	0.505892	FALSE	FALSE	FALSE	0.00153439	0.28	TRUE	12	102514184	0.0246058	8.22224e-07	24.407
childhood absence epilepsy || id:ieu-b-13	ebi-a-GCST90017089	genus Victivallis id.2256	rs4895919	C	T	C	T	0.116918	0.000615833	NA	0.531747	FALSE	FALSE	FALSE	0.0015735	0.7	TRUE	6	131630319	0.0247515	2.75201e-06	22.3131
childhood absence epilepsy || id:ieu-b-13	ebi-a-GCST90017089	genus Victivallis id.2256	rs56349194	A	G	A	G	-0.158501	0.00137556	NA	0.16521	FALSE	FALSE	FALSE	0.00207215	0.51	TRUE	11	9312796	0.0315231	6.25749e-07	25.2817
childhood absence epilepsy || id:ieu-b-13	ebi-a-GCST90016962	genus Alistipes id.968	rs1107244	G	A	G	A	0.0758558	-0.00477211	NA	0.0875827	FALSE	FALSE	FALSE	0.0027245	0.08	TRUE	13	38057357	0.0171182	3.59062e-06	19.6364
childhood absence epilepsy || id:ieu-b-13	ebi-a-GCST90016962	genus Alistipes id.968	rs11769002	G	A	G	A	-0.0528793	-0.00209696	NA	0.405332	FALSE	FALSE	FALSE	0.001586	0.19	TRUE	7	62443498	0.0109389	1.44961e-06	23.3681
childhood absence epilepsy || id:ieu-b-13	ebi-a-GCST90016962	genus Alistipes id.968	rs1689282	A	C	A	C	-0.0520061	0.000134733	NA	0.342681	FALSE	FALSE	FALSE	0.00161756	0.93	TRUE	9	14080129	0.0113942	5.27582e-06	20.8325
childhood absence epilepsy || id:ieu-b-13	ebi-a-GCST90016962	genus Alistipes id.968	rs2290844	C	T	C	T	0.0813969	-0.00445292	NA	0.0835811	FALSE	FALSE	FALSE	0.00274943	0.11	TRUE	10	127787142	0.0191632	9.10144e-06	18.0418
childhood absence epilepsy || id:ieu-b-13	ebi-a-GCST90016962	genus Alistipes id.968	rs2450745	A	C	A	C	-0.080524	0.000344901	NA	0.091249	FALSE	FALSE	FALSE	0.00267347	0.9	TRUE	8	144428720	0.0184702	7.11836e-06	19.0067
childhood absence epilepsy || id:ieu-b-13	ebi-a-GCST90016962	genus Alistipes id.968	rs2875322	C	T	C	T	0.0580945	0.000447906	NA	0.794767	FALSE	FALSE	FALSE	0.0019025	0.81	TRUE	11	130887552	0.0131432	8.77708e-06	19.5374
childhood absence epilepsy || id:ieu-b-13	ebi-a-GCST90016962	genus Alistipes id.968	rs34417064	A	G	A	G	-0.048202	-0.000676587	NA	0.496737	FALSE	FALSE	FALSE	0.00152962	0.66	TRUE	17	52776479	0.0106868	7.00745e-06	20.3439
childhood absence epilepsy || id:ieu-b-13	ebi-a-GCST90016962	genus Alistipes id.968	rs67705352	T	G	T	G	-0.0532404	-0.000230252	NA	0.369467	FALSE	FALSE	FALSE	0.00159892	0.89	TRUE	1	19790706	0.0110864	1.65124e-06	23.0622
childhood absence epilepsy || id:ieu-b-13	ebi-a-GCST90016962	genus Alistipes id.968	rs7129639	A	C	A	C	0.0524955	0.00014037	NA	0.620815	FALSE	FALSE	FALSE	0.00158268	0.93	TRUE	11	17511427	0.0109584	1.78423e-06	22.9483
childhood absence epilepsy || id:ieu-b-13	ebi-a-GCST90016962	genus Alistipes id.968	rs8130320	A	G	A	G	-0.049002	-0.00538436	NA	0.452499	FALSE	FALSE	FALSE	0.00153961	0.000470002	TRUE	21	40580258	0.010717	4.83615e-06	20.9065
childhood absence epilepsy || id:ieu-b-13	ebi-a-GCST90016963	genus Allisonella id.2174	rs1901739	G	T	G	T	-0.115769	-0.00340342	NA	0.52275	FALSE	FALSE	FALSE	0.00154437	0.0280001	TRUE	5	114286707	0.0248626	3.58798e-06	21.6816
childhood absence epilepsy || id:ieu-b-13	ebi-a-GCST90016963	genus Allisonella id.2174	rs35110698	T	C	T	C	-0.146322	0.000619026	NA	0.164017	FALSE	FALSE	FALSE	0.00209932	0.77	TRUE	12	28018998	0.0320852	5.72321e-06	20.7974
childhood absence epilepsy || id:ieu-b-13	ebi-a-GCST90016963	genus Allisonella id.2174	rs35778461	C	T	C	T	0.146679	0.00602056	NA	0.195899	FALSE	FALSE	FALSE	0.00193801	0.00189998	TRUE	9	100150556	0.0297186	1.20629e-06	24.3601
childhood absence epilepsy || id:ieu-b-13	ebi-a-GCST90016963	genus Allisonella id.2174	rs594561	T	C	T	C	-0.112231	0.000857801	NA	0.565762	FALSE	FALSE	FALSE	0.00155492	0.58	TRUE	11	88632972	0.0251681	9.41109e-06	19.885
childhood absence epilepsy || id:ieu-b-13	ebi-a-GCST90016963	genus Allisonella id.2174	rs602075	G	A	G	A	-0.168974	-0.000594639	NA	0.745087	FALSE	FALSE	FALSE	0.0017612	0.74	TRUE	9	79110160	0.0296976	3.56574e-08	32.3741
childhood absence epilepsy || id:ieu-b-13	ebi-a-GCST90016967	genus Anaerotruncus id.2054	rs1431492	C	T	C	T	-0.0654996	0.000462419	NA	0.164216	FALSE	FALSE	FALSE	0.00207143	0.82	TRUE	3	150855371	0.0146188	7.35563e-06	20.0749
childhood absence epilepsy || id:ieu-b-13	ebi-a-GCST90016967	genus Anaerotruncus id.2054	rs17734739	T	C	T	C	0.0660052	-0.00252623	NA	0.181785	FALSE	FALSE	FALSE	0.00199057	0.2	TRUE	2	211663702	0.014908	7.4278e-06	19.6028
childhood absence epilepsy || id:ieu-b-13	ebi-a-GCST90016967	genus Anaerotruncus id.2054	rs4669806	G	T	G	T	0.0576389	-0.000108934	NA	0.273608	FALSE	FALSE	FALSE	0.00171045	0.95	TRUE	2	12200752	0.0122994	2.42058e-06	21.9616
childhood absence epilepsy || id:ieu-b-13	ebi-a-GCST90016967	genus Anaerotruncus id.2054	rs6563550	T	C	T	C	0.0877135	-0.00477587	NA	0.0875677	FALSE	FALSE	FALSE	0.00272417	0.08	TRUE	13	38058413	0.0176745	2.34515e-07	24.6285
childhood absence epilepsy || id:ieu-b-13	ebi-a-GCST90016967	genus Anaerotruncus id.2054	rs7155595	C	A	C	A	0.0539336	0.00228644	NA	0.324402	FALSE	FALSE	FALSE	0.00165352	0.17	TRUE	14	77502546	0.0118903	7.54988e-06	20.5747
childhood absence epilepsy || id:ieu-b-13	ebi-a-GCST90016967	genus Anaerotruncus id.2054	rs9347879	T	C	T	C	0.050618	-0.00232922	NA	0.466864	FALSE	FALSE	FALSE	0.00153222	0.13	TRUE	6	165015261	0.011049	4.22328e-06	20.9877
childhood absence epilepsy || id:ieu-b-13	ebi-a-GCST90016970	genus Bifidobacterium id.436	rs12022129	A	G	A	G	-0.0619356	-0.00299065	NA	0.790325	FALSE	FALSE	FALSE	0.00187376	0.11	TRUE	1	207003374	0.0138937	7.9965e-06	19.8722
childhood absence epilepsy || id:ieu-b-13	ebi-a-GCST90016970	genus Bifidobacterium id.436	rs2491158	A	G	A	G	-0.0712624	0.0044136	NA	0.82683	FALSE	FALSE	FALSE	0.00204386	0.0309999	TRUE	10	126089703	0.015983	8.04711e-06	19.8794
childhood absence epilepsy || id:ieu-b-13	ebi-a-GCST90016970	genus Bifidobacterium id.436	rs55888705	A	G	A	G	0.0546319	0.00178503	NA	0.364234	FALSE	FALSE	FALSE	0.00160834	0.27	TRUE	4	1517826	0.0121139	6.67022e-06	20.3388
childhood absence epilepsy || id:ieu-b-13	ebi-a-GCST90016970	genus Bifidobacterium id.436	rs5746486	T	C	T	C	-0.0536216	-0.000553169	NA	0.366434	FALSE	FALSE	FALSE	0.00159091	0.73	TRUE	22	18354272	0.0120801	8.99953e-06	19.7033
childhood absence epilepsy || id:ieu-b-13	ebi-a-GCST90016970	genus Bifidobacterium id.436	rs857444	C	T	C	T	0.0558234	-0.000855925	NA	0.349909	FALSE	FALSE	FALSE	0.00159483	0.59	TRUE	6	14617591	0.0121219	3.571e-06	21.2076
childhood absence epilepsy || id:ieu-b-13	ebi-a-GCST90016971	genus Bilophila id.3170	rs11069458	C	T	C	T	0.0680947	0.00154484	NA	0.818859	FALSE	FALSE	FALSE	0.00199262	0.44	TRUE	13	102402685	0.015503	7.71543e-06	19.2928
childhood absence epilepsy || id:ieu-b-13	ebi-a-GCST90016971	genus Bilophila id.3170	rs1241171	G	A	G	A	-0.0692654	0.00084881	NA	0.210375	FALSE	FALSE	FALSE	0.00189064	0.649999	TRUE	1	103299921	0.0150148	4.24033e-06	21.2811
childhood absence epilepsy || id:ieu-b-13	ebi-a-GCST90016971	genus Bilophila id.3170	rs1571225	T	C	T	C	-0.0826826	0.000108146	NA	0.857054	FALSE	FALSE	FALSE	0.00219837	0.96	TRUE	9	4940871	0.0170621	1.1229e-06	23.4835
childhood absence epilepsy || id:ieu-b-13	ebi-a-GCST90016971	genus Bilophila id.3170	rs2728491	T	G	T	G	0.0627416	-0.000151168	NA	0.719506	FALSE	FALSE	FALSE	0.00173633	0.93	TRUE	7	47211732	0.0139456	6.33257e-06	20.2412
childhood absence epilepsy || id:ieu-b-13	ebi-a-GCST90016971	genus Bilophila id.3170	rs4798126	G	A	G	A	0.073288	-0.00220871	NA	0.151159	FALSE	FALSE	FALSE	0.00217407	0.31	TRUE	18	3765773	0.016799	7.14661e-06	19.0326
childhood absence epilepsy || id:ieu-b-13	ebi-a-GCST90016971	genus Bilophila id.3170	rs542415	T	C	T	C	-0.0613623	0.00122266	NA	0.342999	FALSE	FALSE	FALSE	0.00164903	0.46	TRUE	15	50011554	0.0133436	4.70945e-06	21.1474
childhood absence epilepsy || id:ieu-b-13	ebi-a-GCST90016971	genus Bilophila id.3170	rs7802841	A	C	A	C	-0.0670097	0.000610684	NA	0.687861	FALSE	FALSE	FALSE	0.00166427	0.709999	TRUE	7	138583840	0.0137701	1.76954e-06	23.6811
childhood absence epilepsy || id:ieu-b-13	ebi-a-GCST90016971	genus Bilophila id.3170	rs9899990	A	G	A	G	-0.102702	0.00167997	NA	0.0851439	FALSE	FALSE	FALSE	0.00276953	0.54	TRUE	17	9121579	0.0233878	9.06692e-06	19.2832
childhood absence epilepsy || id:ieu-b-13	ebi-a-GCST90016972	genus Blautia id.1992	rs2788271	G	T	G	T	0.0575596	-0.00143271	NA	0.826812	FALSE	FALSE	FALSE	0.00202361	0.48	TRUE	1	219117743	0.0133492	7.16391e-06	18.592
childhood absence epilepsy || id:ieu-b-13	ebi-a-GCST90016976	genus Candidatus Soleaferrea id.11350	rs10090365	G	A	G	A	0.0834413	1.89353e-05	NA	0.46052	FALSE	FALSE	FALSE	0.00155849	0.99	TRUE	8	138638199	0.0180989	4.17311e-06	21.2548
childhood absence epilepsy || id:ieu-b-13	ebi-a-GCST90016976	genus Candidatus Soleaferrea id.11350	rs10108780	A	G	A	G	-0.092834	-0.00117378	NA	0.279268	FALSE	FALSE	FALSE	0.00173325	0.5	TRUE	8	123882833	0.0199807	3.64083e-06	21.587
childhood absence epilepsy || id:ieu-b-13	ebi-a-GCST90016976	genus Candidatus Soleaferrea id.11350	rs6489992	A	G	A	G	-0.0840437	-0.000181836	NA	0.367481	FALSE	FALSE	FALSE	0.00159354	0.91	TRUE	12	115352769	0.0187031	7.88787e-06	20.1922
childhood absence epilepsy || id:ieu-b-13	ebi-a-GCST90016976	genus Candidatus Soleaferrea id.11350	rs6494306	A	G	A	G	-0.0969304	-0.00235104	NA	0.223519	FALSE	FALSE	FALSE	0.00182572	0.2	TRUE	15	62394540	0.0214221	5.80056e-06	20.4737
childhood absence epilepsy || id:ieu-b-13	ebi-a-GCST90016976	genus Candidatus Soleaferrea id.11350	rs7400877	C	T	C	T	0.0951085	0.0015864	NA	0.774197	FALSE	FALSE	FALSE	0.0018364	0.39	TRUE	14	76403542	0.0212799	9.29458e-06	19.9756
childhood absence epilepsy || id:ieu-b-13	ebi-a-GCST90016976	genus Candidatus Soleaferrea id.11350	rs9973954	G	A	G	A	-0.0892075	-0.000703072	NA	0.702833	FALSE	FALSE	FALSE	0.00168394	0.68	TRUE	2	19885907	0.0195401	5.94799e-06	20.8425
childhood absence epilepsy || id:ieu-b-13	ebi-a-GCST90016982	genus Coprobacter id.949	rs11532348	C	T	C	T	-0.103931	-0.00143745	NA	0.190069	FALSE	FALSE	FALSE	0.00198926	0.47	TRUE	12	98289796	0.0226826	5.71189e-06	20.9945
childhood absence epilepsy || id:ieu-b-13	ebi-a-GCST90016982	genus Coprobacter id.949	rs143662916	C	T	C	T	0.253264	0.000520526	NA	0.0509504	FALSE	FALSE	FALSE	0.00348085	0.88	TRUE	11	103549974	0.0540141	3.07249e-06	21.9853
childhood absence epilepsy || id:ieu-b-13	ebi-a-GCST90016982	genus Coprobacter id.949	rs213863	T	C	T	C	0.0887412	0.000527091	NA	0.712193	FALSE	FALSE	FALSE	0.00169434	0.760001	TRUE	6	97234939	0.0188377	2.34882e-06	22.1919
childhood absence epilepsy || id:ieu-b-13	ebi-a-GCST90016982	genus Coprobacter id.949	rs74919520	G	A	G	A	0.125703	0.000535546	NA	0.120629	FALSE	FALSE	FALSE	0.00235866	0.82	TRUE	2	32242452	0.0276296	5.76328e-06	20.6987
childhood absence epilepsy || id:ieu-b-13	ebi-a-GCST90016985	genus Coprococcus3 id.11303	rs11080344	C	T	C	T	0.0516921	0.00163353	NA	0.455343	FALSE	FALSE	FALSE	0.00155068	0.29	TRUE	17	26104511	0.0113054	4.78696e-06	20.9063
childhood absence epilepsy || id:ieu-b-13	ebi-a-GCST90016985	genus Coprococcus3 id.11303	rs13394391	C	T	C	T	-0.0709302	-0.00420757	NA	0.170107	FALSE	FALSE	FALSE	0.00206031	0.0409996	TRUE	2	240727657	0.0150918	2.20318e-06	22.0892
childhood absence epilepsy || id:ieu-b-13	ebi-a-GCST90016985	genus Coprococcus3 id.11303	rs8100692	T	C	T	C	0.0577411	0.000410634	NA	0.42826	FALSE	FALSE	FALSE	0.00157884	0.79	TRUE	19	40032132	0.0113476	4.16457e-07	25.8918
childhood absence epilepsy || id:ieu-b-13	ebi-a-GCST90016989	genus Dorea id.1997	rs12537781	T	C	T	C	-0.055544	0.00154026	NA	0.25253	FALSE	FALSE	FALSE	0.00176614	0.38	TRUE	7	154978183	0.0125223	9.15145e-06	19.6746
childhood absence epilepsy || id:ieu-b-13	ebi-a-GCST90016989	genus Dorea id.1997	rs13279148	G	A	G	A	0.0715309	-0.00249085	NA	0.153224	FALSE	FALSE	FALSE	0.00215854	0.25	TRUE	8	127905865	0.0150878	2.25284e-06	22.4769
childhood absence epilepsy || id:ieu-b-13	ebi-a-GCST90016989	genus Dorea id.1997	rs1899291	T	C	T	C	-0.0697217	0.000872777	NA	0.867765	FALSE	FALSE	FALSE	0.00225712	0.7	TRUE	4	60992340	0.0150285	4.56688e-06	21.5231
childhood absence epilepsy || id:ieu-b-13	ebi-a-GCST90016989	genus Dorea id.1997	rs3005511	G	A	G	A	-0.0516127	0.00154133	NA	0.666318	FALSE	FALSE	FALSE	0.00162809	0.34	TRUE	6	74605806	0.0112852	5.28701e-06	20.9168
childhood absence epilepsy || id:ieu-b-13	ebi-a-GCST90016989	genus Dorea id.1997	rs3752849	G	A	G	A	0.163846	0.00605965	NA	0.0406074	FALSE	FALSE	FALSE	0.00391963	0.12	TRUE	11	8729057	0.036608	7.68051e-06	20.0318
childhood absence epilepsy || id:ieu-b-13	ebi-a-GCST90016989	genus Dorea id.1997	rs62503162	A	G	A	G	-0.0974091	0.0012499	NA	0.0821173	FALSE	FALSE	FALSE	0.00279282	0.649999	TRUE	8	15768657	0.0194379	7.46603e-07	25.1131
childhood absence epilepsy || id:ieu-b-13	ebi-a-GCST90016993	genus Erysipelatoclostridium id.11381	rs1434153	G	A	G	A	-0.0684526	0.00193986	NA	0.31908	FALSE	FALSE	FALSE	0.00165902	0.24	TRUE	2	34595533	0.0152443	6.85299e-06	20.1635
childhood absence epilepsy || id:ieu-b-13	ebi-a-GCST90016993	genus Erysipelatoclostridium id.11381	rs16936671	C	T	C	T	-0.0968026	-0.0050204	NA	0.1267	FALSE	FALSE	FALSE	0.00232166	0.0309999	TRUE	10	36394609	0.0217883	6.0431e-06	19.7391
childhood absence epilepsy || id:ieu-b-13	ebi-a-GCST90016993	genus Erysipelatoclostridium id.11381	rs340991	A	G	A	G	-0.0740482	-0.00216712	NA	0.284828	FALSE	FALSE	FALSE	0.00170493	0.2	TRUE	5	34892042	0.0158891	3.74938e-06	21.7185
childhood absence epilepsy || id:ieu-b-13	ebi-a-GCST90016993	genus Erysipelatoclostridium id.11381	rs4697572	A	G	A	G	-0.0810636	-0.000903032	NA	0.246994	FALSE	FALSE	FALSE	0.00180323	0.62	TRUE	4	25446787	0.0163308	7.59347e-07	24.6398
childhood absence epilepsy || id:ieu-b-13	ebi-a-GCST90016993	genus Erysipelatoclostridium id.11381	rs622418	A	G	A	G	-0.0668051	0.000153557	NA	0.50915	FALSE	FALSE	FALSE	0.00156378	0.92	TRUE	9	90586043	0.0143224	3.68154e-06	21.7564
childhood absence epilepsy || id:ieu-b-13	ebi-a-GCST90016993	genus Erysipelatoclostridium id.11381	rs6474512	C	A	C	A	-0.067015	2.6178e-05	NA	0.53848	FALSE	FALSE	FALSE	0.00153456	0.99	TRUE	8	38780606	0.0143201	3.01544e-06	21.9004
childhood absence epilepsy || id:ieu-b-13	ebi-a-GCST90016993	genus Erysipelatoclostridium id.11381	rs9590927	A	G	A	G	0.0646003	-0.00188678	NA	0.51804	FALSE	FALSE	FALSE	0.00156381	0.23	TRUE	13	46372065	0.0143479	6.39043e-06	20.2718
childhood absence epilepsy || id:ieu-b-13	ebi-a-GCST90016995	genus Escherichia Shigella id.3504	rs1154904	G	A	G	A	0.0613376	0.00151879	NA	0.53376	FALSE	FALSE	FALSE	0.00153973	0.32	TRUE	11	134774845	0.0130644	3.03753e-06	22.0432
childhood absence epilepsy || id:ieu-b-13	ebi-a-GCST90016995	genus Escherichia Shigella id.3504	rs118526	A	C	A	C	0.0594401	0.000829019	NA	0.596062	FALSE	FALSE	FALSE	0.00157389	0.6	TRUE	5	79863544	0.013598	7.99558e-06	19.1077
childhood absence epilepsy || id:ieu-b-13	ebi-a-GCST90016995	genus Escherichia Shigella id.3504	rs2798105	A	G	A	G	-0.100851	-0.000502605	NA	0.101105	FALSE	FALSE	FALSE	0.00256693	0.84	TRUE	1	48961903	0.0222045	8.24499e-06	20.629
childhood absence epilepsy || id:ieu-b-13	ebi-a-GCST90016995	genus Escherichia Shigella id.3504	rs4731451	G	A	G	A	-0.0609885	-0.000735278	NA	0.354603	FALSE	FALSE	FALSE	0.0016162	0.649999	TRUE	7	128054100	0.0135157	7.47309e-06	20.3619
childhood absence epilepsy || id:ieu-b-13	ebi-a-GCST90016996	genus Eubacterium brachy group id.11296	rs112617308	T	C	T	C	-0.170873	-0.00362853	NA	0.0970447	FALSE	FALSE	FALSE	0.0026046	0.16	TRUE	10	94185213	0.0362844	2.38035e-06	22.1772
childhood absence epilepsy || id:ieu-b-13	ebi-a-GCST90016996	genus Eubacterium brachy group id.11296	rs1384962	G	A	G	A	-0.120888	0.00296441	NA	0.764516	FALSE	FALSE	FALSE	0.00181154	0.1	TRUE	14	23060552	0.0266264	6.99294e-06	20.613
childhood absence epilepsy || id:ieu-b-13	ebi-a-GCST90016996	genus Eubacterium brachy group id.11296	rs2913110	T	C	T	C	-0.105143	-0.00252233	NA	0.598316	FALSE	FALSE	FALSE	0.00156621	0.11	TRUE	10	22892667	0.022942	4.55806e-06	21.0038
childhood absence epilepsy || id:ieu-b-13	ebi-a-GCST90016996	genus Eubacterium brachy group id.11296	rs4862235	A	G	A	G	-0.104806	0.000869754	NA	0.570049	FALSE	FALSE	FALSE	0.00157999	0.58	TRUE	4	184628931	0.0225751	3.73147e-06	21.5533
childhood absence epilepsy || id:ieu-b-13	ebi-a-GCST90016997	genus Eubacterium coprostanoligenes group id.11375	rs11052069	C	T	C	T	-0.0477832	0.0024704	NA	0.552363	FALSE	FALSE	FALSE	0.00157276	0.12	TRUE	12	32713919	0.0107833	9.37951e-06	19.6357
childhood absence epilepsy || id:ieu-b-13	ebi-a-GCST90016997	genus Eubacterium coprostanoligenes group id.11375	rs11720857	C	T	C	T	0.0630776	-0.00180864	NA	0.170233	FALSE	FALSE	FALSE	0.00207632	0.38	TRUE	3	113794507	0.0144485	9.26254e-06	19.0592
childhood absence epilepsy || id:ieu-b-13	ebi-a-GCST90016997	genus Eubacterium coprostanoligenes group id.11375	rs2644213	A	G	A	G	-0.0538845	0.00117897	NA	0.752767	FALSE	FALSE	FALSE	0.00177009	0.51	TRUE	10	84506096	0.0121245	9.85644e-06	19.7515
childhood absence epilepsy || id:ieu-b-13	ebi-a-GCST90016997	genus Eubacterium coprostanoligenes group id.11375	rs6762473	A	C	A	C	-0.0521584	0.000776101	NA	0.657835	FALSE	FALSE	FALSE	0.00161643	0.630001	TRUE	3	127139574	0.0112353	4.26108e-06	21.5516
childhood absence epilepsy || id:ieu-b-13	ebi-a-GCST90016998	genus Eubacterium eligens group id.14372	rs182318	G	A	G	A	-0.0824941	0.000579138	NA	0.0822066	FALSE	FALSE	FALSE	0.0027946	0.84	TRUE	11	31098691	0.0195615	8.39827e-06	17.7845
childhood absence epilepsy || id:ieu-b-13	ebi-a-GCST90016998	genus Eubacterium eligens group id.14372	rs265534	T	G	T	G	-0.0563756	0.000912856	NA	0.447616	FALSE	FALSE	FALSE	0.001547	0.56	TRUE	10	83092007	0.0120127	2.26757e-06	22.0242
childhood absence epilepsy || id:ieu-b-13	ebi-a-GCST90016998	genus Eubacterium eligens group id.14372	rs6923695	T	G	T	G	0.103268	0.00209334	NA	0.0718783	FALSE	FALSE	FALSE	0.00296624	0.48	TRUE	6	70956815	0.0229525	4.87405e-06	20.2428
childhood absence epilepsy || id:ieu-b-13	ebi-a-GCST90017004	genus Eubacterium ruminantium group id.11340	rs11637981	T	G	T	G	0.073258	0.000263684	NA	0.529948	FALSE	FALSE	FALSE	0.00154482	0.86	TRUE	15	61289622	0.0160888	5.43676e-06	20.733
childhood absence epilepsy || id:ieu-b-13	ebi-a-GCST90017004	genus Eubacterium ruminantium group id.11340	rs13025464	C	T	C	T	0.0737077	-0.00148187	NA	0.623218	FALSE	FALSE	FALSE	0.00157484	0.35	TRUE	2	201610645	0.0163786	6.96835e-06	20.2522
childhood absence epilepsy || id:ieu-b-13	ebi-a-GCST90017004	genus Eubacterium ruminantium group id.11340	rs16891896	G	A	G	A	-0.174787	-0.00196591	NA	0.0501625	FALSE	FALSE	FALSE	0.00348625	0.57	TRUE	5	33897589	0.0390573	2.38122e-06	20.0269
childhood absence epilepsy || id:ieu-b-13	ebi-a-GCST90017004	genus Eubacterium ruminantium group id.11340	rs17519472	C	T	C	T	0.107804	0.00178235	NA	0.13977	FALSE	FALSE	FALSE	0.0022043	0.42	TRUE	12	30360954	0.0233984	4.7036e-06	21.2274
childhood absence epilepsy || id:ieu-b-13	ebi-a-GCST90017004	genus Eubacterium ruminantium group id.11340	rs209813	G	A	G	A	-0.103488	0.000993928	NA	0.135487	FALSE	FALSE	FALSE	0.00223733	0.66	TRUE	6	11953633	0.0236391	9.23145e-06	19.1654
childhood absence epilepsy || id:ieu-b-13	ebi-a-GCST90017004	genus Eubacterium ruminantium group id.11340	rs57340348	T	C	T	C	-0.0979429	0.00212077	NA	0.185159	FALSE	FALSE	FALSE	0.00202638	0.3	TRUE	6	130030114	0.0212166	4.93276e-06	21.3105
childhood absence epilepsy || id:ieu-b-13	ebi-a-GCST90017004	genus Eubacterium ruminantium group id.11340	rs606117	G	A	G	A	-0.0833243	0.00118467	NA	0.698799	FALSE	FALSE	FALSE	0.00168693	0.48	TRUE	9	2539358	0.018056	4.81637e-06	21.2961
childhood absence epilepsy || id:ieu-b-13	ebi-a-GCST90017004	genus Eubacterium ruminantium group id.11340	rs7000472	G	A	G	A	0.0762282	0.00298427	NA	0.606691	FALSE	FALSE	FALSE	0.00157763	0.0589997	TRUE	8	138626268	0.016523	4.06846e-06	21.284
childhood absence epilepsy || id:ieu-b-13	ebi-a-GCST90017004	genus Eubacterium ruminantium group id.11340	rs73139629	A	C	A	C	-0.115098	0.00129482	NA	0.116406	FALSE	FALSE	FALSE	0.00244578	0.6	TRUE	12	63306003	0.0247909	5.36204e-06	21.5551
childhood absence epilepsy || id:ieu-b-13	ebi-a-GCST90017007	genus Faecalibacterium id.2057	rs2835874	T	C	T	C	-0.0866356	-0.00114381	NA	0.0712339	FALSE	FALSE	FALSE	0.00297219	0.7	TRUE	21	39027901	0.0196496	7.54397e-06	19.4395
childhood absence epilepsy || id:ieu-b-13	ebi-a-GCST90017007	genus Faecalibacterium id.2057	rs9536330	T	C	T	C	-0.048317	0.00134976	NA	0.398397	FALSE	FALSE	FALSE	0.0015663	0.39	TRUE	13	53567017	0.010797	5.33261e-06	20.026
childhood absence epilepsy || id:ieu-b-13	ebi-a-GCST90017010	genus Flavonifractor id.2059	rs12030302	G	A	G	A	0.0692276	-0.00266409	NA	0.538126	FALSE	FALSE	FALSE	0.00153074	0.0819993	TRUE	1	77887835	0.0137467	5.60841e-07	25.3607
childhood absence epilepsy || id:ieu-b-13	ebi-a-GCST90017010	genus Flavonifractor id.2059	rs34066017	A	G	A	G	0.0764294	0.000433998	NA	0.257853	FALSE	FALSE	FALSE	0.0017623	0.81	TRUE	11	44849689	0.0159789	1.52086e-06	22.8785
childhood absence epilepsy || id:ieu-b-13	ebi-a-GCST90017010	genus Flavonifractor id.2059	rs806808	C	T	C	T	-0.0667272	0.00318654	NA	0.518383	FALSE	FALSE	FALSE	0.00153937	0.0379997	TRUE	10	32381186	0.0136557	1.17972e-06	23.8769
childhood absence epilepsy || id:ieu-b-13	ebi-a-GCST90017014	genus Holdemanella id.11393	rs12513188	G	A	G	A	0.0903906	0.00160172	NA	0.209889	FALSE	FALSE	FALSE	0.00188974	0.4	TRUE	4	71000791	0.0195276	4.65479e-06	21.4264
childhood absence epilepsy || id:ieu-b-13	ebi-a-GCST90017014	genus Holdemanella id.11393	rs17586763	T	C	T	C	-0.227285	0.00157246	NA	0.0424759	FALSE	FALSE	FALSE	0.00380109	0.68	TRUE	13	50932063	0.0510135	7.71951e-06	19.8505
childhood absence epilepsy || id:ieu-b-13	ebi-a-GCST90017014	genus Holdemanella id.11393	rs34187114	C	A	C	A	-0.104505	0.00029491	NA	0.156067	FALSE	FALSE	FALSE	0.00213107	0.89	TRUE	8	138623633	0.022601	5.13499e-06	21.3805
childhood absence epilepsy || id:ieu-b-13	ebi-a-GCST90017016	genus Howardella id.2000	rs10048062	C	T	C	T	-0.147352	-0.00513197	NA	0.126801	FALSE	FALSE	FALSE	0.00229862	0.0259998	TRUE	15	98476920	0.0336531	8.58875e-06	19.1718
childhood absence epilepsy || id:ieu-b-13	ebi-a-GCST90017016	genus Howardella id.2000	rs12452946	A	G	A	G	-0.105833	-0.00105642	NA	0.491822	FALSE	FALSE	FALSE	0.00154539	0.49	TRUE	17	17253288	0.0228941	3.80391e-06	21.3695
childhood absence epilepsy || id:ieu-b-13	ebi-a-GCST90017016	genus Howardella id.2000	rs1484873	G	A	G	A	0.227831	0.00395152	NA	0.940246	FALSE	FALSE	FALSE	0.00322546	0.22	TRUE	18	43206985	0.046335	2.55918e-06	24.1773
childhood absence epilepsy || id:ieu-b-13	ebi-a-GCST90017016	genus Howardella id.2000	rs17167098	G	A	G	A	-0.169366	-0.000833732	NA	0.128985	FALSE	FALSE	FALSE	0.00230177	0.719999	TRUE	7	133154356	0.0352068	1.12323e-06	23.1419
childhood absence epilepsy || id:ieu-b-13	ebi-a-GCST90017016	genus Howardella id.2000	rs3791893	A	G	A	G	0.147035	0.00060447	NA	0.1154	FALSE	FALSE	FALSE	0.00240749	0.8	TRUE	2	218819396	0.034023	9.49708e-06	18.6765
childhood absence epilepsy || id:ieu-b-13	ebi-a-GCST90017016	genus Howardella id.2000	rs609430	T	G	T	G	-0.112045	0.00103269	NA	0.345075	FALSE	FALSE	FALSE	0.00161189	0.52	TRUE	4	169178315	0.0239328	3.34488e-06	21.9178
childhood absence epilepsy || id:ieu-b-13	ebi-a-GCST90017016	genus Howardella id.2000	rs672217	G	A	G	A	0.164146	0.000874234	NA	0.131911	FALSE	FALSE	FALSE	0.00228047	0.7	TRUE	18	60125134	0.0349993	3.52468e-06	21.9959
childhood absence epilepsy || id:ieu-b-13	ebi-a-GCST90017017	genus Hungatella id.11306	rs10044993	A	C	A	C	-0.139547	-0.00190747	NA	0.86665	FALSE	FALSE	FALSE	0.00229005	0.4	TRUE	5	58424440	0.0316748	8.06659e-06	19.4095
childhood absence epilepsy || id:ieu-b-13	ebi-a-GCST90017017	genus Hungatella id.11306	rs13128780	T	C	T	C	-0.149725	-0.00104299	NA	0.136391	FALSE	FALSE	FALSE	0.00225607	0.64	TRUE	4	166058998	0.0312777	1.74997e-06	22.915
childhood absence epilepsy || id:ieu-b-13	ebi-a-GCST90017017	genus Hungatella id.11306	rs17092615	G	A	G	A	0.152235	0.00208997	NA	0.13115	FALSE	FALSE	FALSE	0.00230095	0.36	TRUE	14	95973619	0.0337867	7.37683e-06	20.3019
childhood absence epilepsy || id:ieu-b-13	ebi-a-GCST90017026	genus Lachnospiraceae UCG004 id.11324	rs11128180	A	G	A	G	0.0648288	7.96168e-05	NA	0.230399	FALSE	FALSE	FALSE	0.00183642	0.97	TRUE	3	70592215	0.0140126	4.51742e-06	21.4042
childhood absence epilepsy || id:ieu-b-13	ebi-a-GCST90017026	genus Lachnospiraceae UCG004 id.11324	rs12072562	T	C	T	C	0.133104	0.00219178	NA	0.0539143	FALSE	FALSE	FALSE	0.00338233	0.52	TRUE	1	105287469	0.0303566	7.07375e-06	19.2254
childhood absence epilepsy || id:ieu-b-13	ebi-a-GCST90017026	genus Lachnospiraceae UCG004 id.11324	rs12673420	G	A	G	A	0.0554351	0.00255649	NA	0.430687	FALSE	FALSE	FALSE	0.00156114	0.1	TRUE	7	71303007	0.0118375	2.98078e-06	21.9306
childhood absence epilepsy || id:ieu-b-13	ebi-a-GCST90017026	genus Lachnospiraceae UCG004 id.11324	rs12747809	A	G	A	G	0.062197	-0.000261093	NA	0.6875	FALSE	FALSE	FALSE	0.00165006	0.87	TRUE	1	240359089	0.0125685	8.64868e-07	24.4891
childhood absence epilepsy || id:ieu-b-13	ebi-a-GCST90017026	genus Lachnospiraceae UCG004 id.11324	rs12894272	G	A	G	A	-0.0579792	0.00017301	NA	0.681126	FALSE	FALSE	FALSE	0.00166243	0.92	TRUE	14	40536481	0.0125229	4.3395e-06	21.4355
childhood absence epilepsy || id:ieu-b-13	ebi-a-GCST90017026	genus Lachnospiraceae UCG004 id.11324	rs233486	G	A	G	A	0.0799088	-0.00084548	NA	0.870355	FALSE	FALSE	FALSE	0.00227804	0.709999	TRUE	6	14817584	0.017766	6.28463e-06	20.2307
childhood absence epilepsy || id:ieu-b-13	ebi-a-GCST90017026	genus Lachnospiraceae UCG004 id.11324	rs2444793	T	C	T	C	0.0542433	0.00301392	NA	0.528414	FALSE	FALSE	FALSE	0.00153815	0.05	TRUE	6	81318836	0.0118188	4.77079e-06	21.0642
childhood absence epilepsy || id:ieu-b-13	ebi-a-GCST90017026	genus Lachnospiraceae UCG004 id.11324	rs2882478	G	A	G	A	-0.0577091	0.000929362	NA	0.452445	FALSE	FALSE	FALSE	0.0015577	0.55	TRUE	2	49904589	0.0118338	1.20812e-06	23.7815
childhood absence epilepsy || id:ieu-b-13	ebi-a-GCST90017026	genus Lachnospiraceae UCG004 id.11324	rs6656451	T	C	T	C	0.05436	0.00089427	NA	0.552772	FALSE	FALSE	FALSE	0.00155299	0.56	TRUE	1	65990422	0.011947	5.56775e-06	20.7034
childhood absence epilepsy || id:ieu-b-13	ebi-a-GCST90017026	genus Lachnospiraceae UCG004 id.11324	rs7629954	A	G	A	G	0.108441	-0.0017999	NA	0.0736912	FALSE	FALSE	FALSE	0.00294961	0.54	TRUE	3	154242406	0.023825	5.77218e-06	20.7167
childhood absence epilepsy || id:ieu-b-13	ebi-a-GCST90017028	genus Lachnospiraceae UCG010 id.11330	rs12346653	C	T	C	T	0.0657686	0.0016815	NA	0.256033	FALSE	FALSE	FALSE	0.00177302	0.34	TRUE	9	92267239	0.0139569	2.70321e-06	22.2054
childhood absence epilepsy || id:ieu-b-13	ebi-a-GCST90017028	genus Lachnospiraceae UCG010 id.11330	rs17730011	G	A	G	A	-0.0702357	-0.00356582	NA	0.184351	FALSE	FALSE	FALSE	0.00199939	0.0749998	TRUE	6	84772845	0.015706	7.84603e-06	19.9979
childhood absence epilepsy || id:ieu-b-13	ebi-a-GCST90017028	genus Lachnospiraceae UCG010 id.11330	rs336138	G	T	G	T	0.0779543	0.000258039	NA	0.152964	FALSE	FALSE	FALSE	0.0021515	0.9	TRUE	5	8146371	0.0171865	7.48411e-06	20.5734
childhood absence epilepsy || id:ieu-b-13	ebi-a-GCST90017028	genus Lachnospiraceae UCG010 id.11330	rs4576377	C	A	C	A	0.0572001	0.00124833	NA	0.622201	FALSE	FALSE	FALSE	0.00161327	0.44	TRUE	7	81410263	0.0127043	7.63062e-06	20.2718
childhood absence epilepsy || id:ieu-b-13	ebi-a-GCST90017028	genus Lachnospiraceae UCG010 id.11330	rs72894957	G	A	G	A	0.222263	-0.00256864	NA	0.0432829	FALSE	FALSE	FALSE	0.00373932	0.49	TRUE	2	185862591	0.0486425	5.68434e-06	20.8787
childhood absence epilepsy || id:ieu-b-13	ebi-a-GCST90017029	genus Lachnospira id.2004	rs56791201	C	T	C	T	-0.051823	-0.00339671	NA	0.528946	FALSE	FALSE	FALSE	0.00153848	0.0269998	TRUE	2	57701660	0.0110697	2.9282e-06	21.9166
childhood absence epilepsy || id:ieu-b-13	ebi-a-GCST90017035	genus Olsenella id.822	rs1035588	A	G	A	G	-0.108148	-0.00107153	NA	0.371093	FALSE	FALSE	FALSE	0.00162642	0.51	TRUE	2	150077190	0.0236848	4.85501e-06	20.8496
childhood absence epilepsy || id:ieu-b-13	ebi-a-GCST90017035	genus Olsenella id.822	rs17148768	G	A	G	A	0.140434	0.00114313	NA	0.186341	FALSE	FALSE	FALSE	0.00198453	0.56	TRUE	10	10777085	0.0295602	2.19842e-06	22.5699
childhood absence epilepsy || id:ieu-b-13	ebi-a-GCST90017035	genus Olsenella id.822	rs2759329	A	G	A	G	0.111131	0.0012983	NA	0.610541	FALSE	FALSE	FALSE	0.00156619	0.41	TRUE	1	231960352	0.0237218	3.43202e-06	21.947
childhood absence epilepsy || id:ieu-b-13	ebi-a-GCST90017035	genus Olsenella id.822	rs61090148	A	G	A	G	-0.104783	-0.000216978	NA	0.452137	FALSE	FALSE	FALSE	0.00158838	0.89	TRUE	4	174810498	0.0231343	6.43724e-06	20.5149
childhood absence epilepsy || id:ieu-b-13	ebi-a-GCST90017035	genus Olsenella id.822	rs7540303	C	T	C	T	0.108044	-0.00165633	NA	0.390154	FALSE	FALSE	FALSE	0.00156973	0.29	TRUE	1	179629191	0.023638	5.32023e-06	20.892
childhood absence epilepsy || id:ieu-b-13	ebi-a-GCST90017035	genus Olsenella id.822	rs8066522	A	G	A	G	0.106529	0.00115723	NA	0.65268	FALSE	FALSE	FALSE	0.00161236	0.47	TRUE	17	59632873	0.0240379	9.70085e-06	19.6401
childhood absence epilepsy || id:ieu-b-13	ebi-a-GCST90017036	genus Oscillibacter id.2063	rs11627628	T	C	T	C	0.143961	-0.00156002	NA	0.0791193	FALSE	FALSE	FALSE	0.00283451	0.58	TRUE	14	21479605	0.0290223	1.00921e-06	24.6052
childhood absence epilepsy || id:ieu-b-13	ebi-a-GCST90017036	genus Oscillibacter id.2063	rs16866406	A	G	A	G	0.0988765	0.0020402	NA	0.140931	FALSE	FALSE	FALSE	0.00219935	0.35	TRUE	2	179457147	0.0208795	3.07822e-06	22.4257
childhood absence epilepsy || id:ieu-b-13	ebi-a-GCST90017036	genus Oscillibacter id.2063	rs16934185	A	G	A	G	-0.129568	-0.00490957	NA	0.0876157	FALSE	FALSE	FALSE	0.00269869	0.0690001	TRUE	9	1798324	0.028157	4.38036e-06	21.175
childhood absence epilepsy || id:ieu-b-13	ebi-a-GCST90017036	genus Oscillibacter id.2063	rs234108	A	G	A	G	0.0749553	0.000451747	NA	0.473364	FALSE	FALSE	FALSE	0.00156685	0.77	TRUE	1	184942671	0.0152632	9.16326e-07	24.1165
childhood absence epilepsy || id:ieu-b-13	ebi-a-GCST90017036	genus Oscillibacter id.2063	rs36095275	C	T	C	T	-0.0752368	-0.00401512	NA	0.373826	FALSE	FALSE	FALSE	0.00162032	0.0129999	TRUE	14	32270129	0.0156861	1.39627e-06	23.0054
childhood absence epilepsy || id:ieu-b-13	ebi-a-GCST90017036	genus Oscillibacter id.2063	rs4506202	G	A	G	A	0.0711323	-0.000385533	NA	0.466996	FALSE	FALSE	FALSE	0.00153873	0.8	TRUE	8	21598077	0.0152261	3.20826e-06	21.8251
childhood absence epilepsy || id:ieu-b-13	ebi-a-GCST90017036	genus Oscillibacter id.2063	rs61883564	A	G	A	G	-0.101351	-0.00517578	NA	0.130085	FALSE	FALSE	FALSE	0.00229834	0.0239999	TRUE	11	79013843	0.0221016	3.38712e-06	21.0285
childhood absence epilepsy || id:ieu-b-13	ebi-a-GCST90017040	genus Paraprevotella id.962	rs17109926	A	G	A	G	-0.0988335	0.00247341	NA	0.184969	FALSE	FALSE	FALSE	0.00198026	0.21	TRUE	12	71978728	0.0216172	6.75274e-06	20.903
childhood absence epilepsy || id:ieu-b-13	ebi-a-GCST90017040	genus Paraprevotella id.962	rs2081023	A	G	A	G	-0.122561	-0.00495137	NA	0.110208	FALSE	FALSE	FALSE	0.00247112	0.0449997	TRUE	5	174606261	0.0236507	2.63797e-07	26.8545
childhood absence epilepsy || id:ieu-b-13	ebi-a-GCST90017040	genus Paraprevotella id.962	rs3008582	T	C	T	C	0.10572	0.00094403	NA	0.152186	FALSE	FALSE	FALSE	0.00215481	0.66	TRUE	1	195971173	0.0227246	4.35993e-06	21.6432
childhood absence epilepsy || id:ieu-b-13	ebi-a-GCST90017040	genus Paraprevotella id.962	rs3801748	G	A	G	A	0.0779721	0.00322452	NA	0.371016	FALSE	FALSE	FALSE	0.00158629	0.0420001	TRUE	7	81759508	0.0171691	5.20176e-06	20.6245
childhood absence epilepsy || id:ieu-b-13	ebi-a-GCST90017040	genus Paraprevotella id.962	rs4756632	G	T	G	T	-0.138905	-0.00126651	NA	0.0832732	FALSE	FALSE	FALSE	0.00277795	0.649999	TRUE	11	41079703	0.0289897	3.81751e-06	22.9588
childhood absence epilepsy || id:ieu-b-13	ebi-a-GCST90017040	genus Paraprevotella id.962	rs9900242	A	G	A	G	-0.0852967	-0.000973759	NA	0.383454	FALSE	FALSE	FALSE	0.00156988	0.54	TRUE	17	69135631	0.0175212	1.14067e-06	23.6994
childhood absence epilepsy || id:ieu-b-13	ebi-a-GCST90017041	genus Parasutterella id.2892	rs10899911	A	G	A	G	-0.0717102	-0.00179186	NA	0.27307	FALSE	FALSE	FALSE	0.00171246	0.3	TRUE	10	44293839	0.0148151	1.15271e-06	23.4289
childhood absence epilepsy || id:ieu-b-13	ebi-a-GCST90017041	genus Parasutterella id.2892	rs11715853	G	A	G	A	-0.0662952	0.000955278	NA	0.289097	FALSE	FALSE	FALSE	0.00169466	0.57	TRUE	3	30163689	0.0146114	6.22917e-06	20.5864
childhood absence epilepsy || id:ieu-b-13	ebi-a-GCST90017041	genus Parasutterella id.2892	rs62273907	A	G	A	G	0.229468	0.00303591	NA	0.0465592	FALSE	FALSE	FALSE	0.00363092	0.4	TRUE	3	156550415	0.0502262	5.88383e-06	20.8729
childhood absence epilepsy || id:ieu-b-13	ebi-a-GCST90017041	genus Parasutterella id.2892	rs7303158	C	T	C	T	0.0646859	-0.00220358	NA	0.443386	FALSE	FALSE	FALSE	0.00154721	0.15	TRUE	12	5275540	0.0134256	1.32776e-06	23.2141
childhood absence epilepsy || id:ieu-b-13	ebi-a-GCST90017041	genus Parasutterella id.2892	rs7311004	C	T	C	T	0.0617522	0.00144375	NA	0.598467	FALSE	FALSE	FALSE	0.00158077	0.36	TRUE	12	53260710	0.0136438	5.92052e-06	20.4849
childhood absence epilepsy || id:ieu-b-13	ebi-a-GCST90017041	genus Parasutterella id.2892	rs7572229	A	G	A	G	-0.066273	-8.69908e-05	NA	0.505637	FALSE	FALSE	FALSE	0.00154243	0.96	TRUE	2	72235444	0.0132736	6.31699e-07	24.9285
childhood absence epilepsy || id:ieu-b-13	ebi-a-GCST90017041	genus Parasutterella id.2892	rs78383039	T	C	T	C	-0.146315	-0.00241582	NA	0.0575648	FALSE	FALSE	FALSE	0.00332816	0.47	TRUE	2	178954708	0.0297119	1.57438e-06	24.2503
childhood absence epilepsy || id:ieu-b-13	ebi-a-GCST90017041	genus Parasutterella id.2892	rs8039785	G	T	G	T	-0.0618345	-0.00224001	NA	0.530387	FALSE	FALSE	FALSE	0.00155308	0.15	TRUE	15	67316307	0.0133	3.62093e-06	21.6152
childhood absence epilepsy || id:ieu-b-13	ebi-a-GCST90017041	genus Parasutterella id.2892	rs823424	G	A	G	A	-0.0713448	-0.000812621	NA	0.215299	FALSE	FALSE	FALSE	0.00187638	0.66	TRUE	8	16674526	0.0156958	4.95291e-06	20.6613
childhood absence epilepsy || id:ieu-b-13	ebi-a-GCST90017043	genus Phascolarctobacterium id.2168	rs11929846	T	C	T	C	-0.0697199	-0.000125497	NA	0.209679	FALSE	FALSE	FALSE	0.001921	0.95	TRUE	4	17051156	0.0157969	8.88423e-06	19.4791
childhood absence epilepsy || id:ieu-b-13	ebi-a-GCST90017043	genus Phascolarctobacterium id.2168	rs12618201	A	G	A	G	0.0641657	0.000309564	NA	0.364712	FALSE	FALSE	FALSE	0.00159418	0.85	TRUE	2	174436533	0.0138202	3.37699e-06	21.5564
childhood absence epilepsy || id:ieu-b-13	ebi-a-GCST90017043	genus Phascolarctobacterium id.2168	rs1264476	G	T	G	T	-0.0767335	-0.00191657	NA	0.796674	FALSE	FALSE	FALSE	0.00191327	0.32	TRUE	8	102434276	0.0166041	4.29566e-06	21.357
childhood absence epilepsy || id:ieu-b-13	ebi-a-GCST90017043	genus Phascolarctobacterium id.2168	rs56069061	G	A	G	A	-0.111306	-0.00429815	NA	0.100291	FALSE	FALSE	FALSE	0.00260864	0.0990011	TRUE	3	168339417	0.0230694	1.87176e-06	23.279
childhood absence epilepsy || id:ieu-b-13	ebi-a-GCST90017045	genus Prevotella9 id.11183	rs2683313	G	A	G	A	0.0724576	-0.000989775	NA	0.680932	FALSE	FALSE	FALSE	0.00167694	0.56	TRUE	8	19115604	0.0151603	1.68896e-06	22.843
childhood absence epilepsy || id:ieu-b-13	ebi-a-GCST90017045	genus Prevotella9 id.11183	rs9428102	A	G	A	G	-0.0778845	-0.000829206	NA	0.213436	FALSE	FALSE	FALSE	0.00190725	0.66	TRUE	1	118852817	0.0176068	4.61732e-06	19.5678
childhood absence epilepsy || id:ieu-b-13	ebi-a-GCST90017046	genus Rikenellaceae RC9 gut group id.11191	rs17582787	A	G	A	G	-0.157739	0.00234753	NA	0.145883	FALSE	FALSE	FALSE	0.00217854	0.28	TRUE	4	149562638	0.0339924	3.55378e-06	21.5335
childhood absence epilepsy || id:ieu-b-13	ebi-a-GCST90017046	genus Rikenellaceae RC9 gut group id.11191	rs2900503	T	G	T	G	0.172329	0.000157194	NA	0.836365	FALSE	FALSE	FALSE	0.00207969	0.94	TRUE	9	112657543	0.0326671	1.55282e-07	27.8289
childhood absence epilepsy || id:ieu-b-13	ebi-a-GCST90017046	genus Rikenellaceae RC9 gut group id.11191	rs4270579	A	G	A	G	0.118021	0.00139026	NA	0.706861	FALSE	FALSE	FALSE	0.00169583	0.41	TRUE	4	84698188	0.0271041	5.45645e-06	18.9604
childhood absence epilepsy || id:ieu-b-13	ebi-a-GCST90017046	genus Rikenellaceae RC9 gut group id.11191	rs7712231	A	G	A	G	0.156284	8.4532e-05	NA	0.144473	FALSE	FALSE	FALSE	0.00219478	0.97	TRUE	5	31406285	0.0350462	7.9704e-06	19.886
childhood absence epilepsy || id:ieu-b-13	ebi-a-GCST90017046	genus Rikenellaceae RC9 gut group id.11191	rs80309088	G	A	G	A	0.17405	0.000911946	NA	0.118326	FALSE	FALSE	FALSE	0.00238406	0.7	TRUE	6	165668732	0.0383423	4.55638e-06	20.6059
childhood absence epilepsy || id:ieu-b-13	ebi-a-GCST90017051	genus Ruminiclostridium9 id.11357	rs115044523	G	A	G	A	-0.0980026	-0.00412753	NA	0.0860717	FALSE	FALSE	FALSE	0.00276386	0.14	TRUE	7	47013498	0.0202616	2.37203e-06	23.3953
childhood absence epilepsy || id:ieu-b-13	ebi-a-GCST90017051	genus Ruminiclostridium9 id.11357	rs12040548	G	T	G	T	0.0570422	-0.00182232	NA	0.270656	FALSE	FALSE	FALSE	0.00175844	0.3	TRUE	1	247710285	0.0122359	3.14869e-06	21.7331
childhood absence epilepsy || id:ieu-b-13	ebi-a-GCST90017051	genus Ruminiclostridium9 id.11357	rs6082461	C	A	C	A	-0.0586425	0.00129654	NA	0.787389	FALSE	FALSE	FALSE	0.00187373	0.49	TRUE	20	2210530	0.0131004	4.86598e-06	20.0381
childhood absence epilepsy || id:ieu-b-13	ebi-a-GCST90017051	genus Ruminiclostridium9 id.11357	rs7137760	C	T	C	T	0.050797	-0.00137734	NA	0.40751	FALSE	FALSE	FALSE	0.00156387	0.38	TRUE	12	10702414	0.0112182	7.06903e-06	20.5036
childhood absence epilepsy || id:ieu-b-13	ebi-a-GCST90017051	genus Ruminiclostridium9 id.11357	rs74303178	T	C	T	C	0.0532742	0.000698778	NA	0.295215	FALSE	FALSE	FALSE	0.0017155	0.68	TRUE	8	14697544	0.0119274	7.91571e-06	19.95
childhood absence epilepsy || id:ieu-b-13	ebi-a-GCST90017051	genus Ruminiclostridium9 id.11357	rs78191726	T	C	T	C	0.0944998	-0.00555562	NA	0.0822746	FALSE	FALSE	FALSE	0.00281395	0.0479999	TRUE	6	67655320	0.0210206	7.58281e-06	20.2102
childhood absence epilepsy || id:ieu-b-13	ebi-a-GCST90017051	genus Ruminiclostridium9 id.11357	rs9522712	T	C	T	C	0.0699728	-0.00388745	NA	0.148929	FALSE	FALSE	FALSE	0.00214418	0.0700003	TRUE	13	90441578	0.0154939	4.65961e-06	20.3956
childhood absence epilepsy || id:ieu-b-13	ebi-a-GCST90017051	genus Ruminiclostridium9 id.11357	rs9809789	C	T	C	T	-0.0717454	0.000804059	NA	0.145157	FALSE	FALSE	FALSE	0.00217902	0.709999	TRUE	3	29179983	0.0159673	8.71967e-06	20.1895
childhood absence epilepsy || id:ieu-b-13	ebi-a-GCST90017053	genus Ruminococcaceae UCG002 id.11360	rs10916131	C	T	C	T	-0.069333	0.0038438	NA	0.162018	FALSE	FALSE	FALSE	0.00208252	0.0649995	TRUE	1	227563126	0.0146753	2.87495e-06	22.3206
childhood absence epilepsy || id:ieu-b-13	ebi-a-GCST90017053	genus Ruminococcaceae UCG002 id.11360	rs10927423	C	A	C	A	-0.0713617	0.00172413	NA	0.155315	FALSE	FALSE	FALSE	0.00212331	0.42	TRUE	1	14732458	0.0147712	8.49513e-07	23.3399
childhood absence epilepsy || id:ieu-b-13	ebi-a-GCST90017053	genus Ruminococcaceae UCG002 id.11360	rs10964441	G	A	G	A	-0.14906	0.00128841	NA	0.0518382	FALSE	FALSE	FALSE	0.0034431	0.709999	TRUE	9	20131746	0.034486	7.45109e-06	18.6826
childhood absence epilepsy || id:ieu-b-13	ebi-a-GCST90017053	genus Ruminococcaceae UCG002 id.11360	rs113147300	A	G	A	G	-0.075842	-0.000682877	NA	0.136627	FALSE	FALSE	FALSE	0.00225608	0.760001	TRUE	9	114066670	0.0164562	7.69148e-06	21.2403
childhood absence epilepsy || id:ieu-b-13	ebi-a-GCST90017053	genus Ruminococcaceae UCG002 id.11360	rs11607472	A	G	A	G	-0.0780229	-0.00323752	NA	0.111765	FALSE	FALSE	FALSE	0.00242953	0.18	TRUE	11	43344751	0.0176325	7.18671e-06	19.5802
childhood absence epilepsy || id:ieu-b-13	ebi-a-GCST90017053	genus Ruminococcaceae UCG002 id.11360	rs11750293	G	T	G	T	-0.0578304	-0.00172944	NA	0.276061	FALSE	FALSE	FALSE	0.00172991	0.32	TRUE	5	123822114	0.0120512	1.76137e-06	23.0278
childhood absence epilepsy || id:ieu-b-13	ebi-a-GCST90017053	genus Ruminococcaceae UCG002 id.11360	rs15256	C	T	C	T	0.0732376	-0.0030171	NA	0.0958109	FALSE	FALSE	FALSE	0.00259656	0.25	TRUE	10	73820548	0.016834	9.45649e-06	18.9275
childhood absence epilepsy || id:ieu-b-13	ebi-a-GCST90017053	genus Ruminococcaceae UCG002 id.11360	rs57079348	T	G	T	G	-0.0765729	0.0021301	NA	0.111174	FALSE	FALSE	FALSE	0.00246079	0.39	TRUE	13	87920450	0.0172819	7.21822e-06	19.6321
childhood absence epilepsy || id:ieu-b-13	ebi-a-GCST90017053	genus Ruminococcaceae UCG002 id.11360	rs6542556	G	A	G	A	-0.050974	-0.00155339	NA	0.64995	FALSE	FALSE	FALSE	0.00160892	0.33	TRUE	2	120757853	0.011406	7.86122e-06	19.9724
childhood absence epilepsy || id:ieu-b-13	ebi-a-GCST90017053	genus Ruminococcaceae UCG002 id.11360	rs6793778	T	C	T	C	0.0558706	0.00225859	NA	0.751053	FALSE	FALSE	FALSE	0.00178735	0.21	TRUE	3	24045453	0.0125258	9.81296e-06	19.8955
childhood absence epilepsy || id:ieu-b-13	ebi-a-GCST90017053	genus Ruminococcaceae UCG002 id.11360	rs7120052	A	C	A	C	0.0624796	-0.000733494	NA	0.180309	FALSE	FALSE	FALSE	0.00199933	0.709999	TRUE	11	86335459	0.0135523	1.96897e-06	21.2545
childhood absence epilepsy || id:ieu-b-13	ebi-a-GCST90017053	genus Ruminococcaceae UCG002 id.11360	rs7155595	C	A	C	A	0.0569929	0.00228644	NA	0.324402	FALSE	FALSE	FALSE	0.00165352	0.17	TRUE	14	77502546	0.0116986	1.14932e-06	23.7342
childhood absence epilepsy || id:ieu-b-13	ebi-a-GCST90017053	genus Ruminococcaceae UCG002 id.11360	rs76847269	A	G	A	G	0.163508	-0.00390218	NA	0.0530813	FALSE	FALSE	FALSE	0.00342704	0.25	TRUE	5	141014951	0.0356151	5.1719e-06	21.077
childhood absence epilepsy || id:ieu-b-13	ebi-a-GCST90017066	genus Ruminococcus torques group id.14377	rs10967781	C	A	C	A	0.0507994	-0.00164102	NA	0.333847	FALSE	FALSE	FALSE	0.0016312	0.31	TRUE	9	27225258	0.0113322	8.36874e-06	20.095
childhood absence epilepsy || id:ieu-b-13	ebi-a-GCST90017066	genus Ruminococcus torques group id.14377	rs4073731	T	C	T	C	0.0651948	-0.000936305	NA	0.155669	FALSE	FALSE	FALSE	0.00213262	0.66	TRUE	11	132663147	0.0142221	4.05247e-06	21.0135
childhood absence epilepsy || id:ieu-b-13	ebi-a-GCST90017066	genus Ruminococcus torques group id.14377	rs77034621	T	G	T	G	-0.151553	-0.00123899	NA	0.0509304	FALSE	FALSE	FALSE	0.00348696	0.719999	TRUE	8	76769843	0.0335878	6.06876e-06	20.3594
childhood absence epilepsy || id:ieu-b-13	ebi-a-GCST90017066	genus Ruminococcus torques group id.14377	rs8080469	G	A	G	A	0.0490727	-0.000231446	NA	0.494161	FALSE	FALSE	FALSE	0.00153575	0.88	TRUE	17	14532347	0.0107036	3.49526e-06	21.0194
childhood absence epilepsy || id:ieu-b-13	ebi-a-GCST90017066	genus Ruminococcus torques group id.14377	rs8141465	G	A	G	A	-0.0480778	-0.000367214	NA	0.473832	FALSE	FALSE	FALSE	0.00154794	0.81	TRUE	22	21358653	0.0107442	9.64828e-06	20.0235
childhood absence epilepsy || id:ieu-b-13	ebi-a-GCST90017067	genus Sellimonas id.14369	rs113379006	T	C	T	C	-0.162759	-0.000199243	NA	0.15224	FALSE	FALSE	FALSE	0.00213121	0.93	TRUE	3	42008186	0.0357025	7.20775e-06	20.7823
childhood absence epilepsy || id:ieu-b-13	ebi-a-GCST90017067	genus Sellimonas id.14369	rs2016057	C	A	C	A	0.125878	-0.0020766	NA	0.607563	FALSE	FALSE	FALSE	0.00157626	0.19	TRUE	15	52105282	0.0256153	1.02698e-06	24.1491
childhood absence epilepsy || id:ieu-b-13	ebi-a-GCST90017067	genus Sellimonas id.14369	rs2371572	A	C	A	C	0.127349	0.000783758	NA	0.532887	FALSE	FALSE	FALSE	0.00154132	0.61	TRUE	2	213214174	0.0250862	4.46355e-07	25.7704
childhood absence epilepsy || id:ieu-b-13	ebi-a-GCST90017067	genus Sellimonas id.14369	rs41816	A	G	A	G	0.132201	0.00118458	NA	0.245904	FALSE	FALSE	FALSE	0.00178942	0.51	TRUE	7	106250164	0.0291087	8.39363e-06	20.6264
childhood absence epilepsy || id:ieu-b-13	ebi-a-GCST90017067	genus Sellimonas id.14369	rs56203279	T	C	T	C	-0.124045	-0.00112475	NA	0.308136	FALSE	FALSE	FALSE	0.0016742	0.5	TRUE	7	111501524	0.0269115	3.71997e-06	21.2463
childhood absence epilepsy || id:ieu-b-13	ebi-a-GCST90017069	genus Slackia id.825	rs12440440	A	G	A	G	0.0901934	-0.00224347	NA	0.328036	FALSE	FALSE	FALSE	0.00163297	0.17	TRUE	15	34041896	0.0190582	2.62869e-06	22.3968
childhood absence epilepsy || id:ieu-b-13	ebi-a-GCST90017069	genus Slackia id.825	rs16894137	C	T	C	T	-0.122792	-0.00256357	NA	0.138044	FALSE	FALSE	FALSE	0.00222902	0.25	TRUE	8	96946291	0.0263047	2.71181e-06	21.7908
childhood absence epilepsy || id:ieu-b-13	ebi-a-GCST90017069	genus Slackia id.825	rs4492265	G	A	G	A	0.0905757	0.00155368	NA	0.677695	FALSE	FALSE	FALSE	0.00167019	0.35	TRUE	7	13523683	0.0191658	2.40924e-06	22.3342
childhood absence epilepsy || id:ieu-b-13	ebi-a-GCST90017069	genus Slackia id.825	rs8901	C	T	C	T	0.0934594	0.000725312	NA	0.379469	FALSE	FALSE	FALSE	0.00160015	0.649999	TRUE	17	74267010	0.0186813	6.07002e-07	25.0283
childhood absence epilepsy || id:ieu-b-13	ebi-a-GCST90017071	genus Subdoligranulum id.2070	rs10497836	T	C	T	C	0.0524065	-0.00123133	NA	0.738005	FALSE	FALSE	FALSE	0.00173654	0.48	TRUE	2	200288718	0.0118697	8.37954e-06	19.4935
childhood absence epilepsy || id:ieu-b-13	ebi-a-GCST90017071	genus Subdoligranulum id.2070	rs1667315	G	A	G	A	0.0485017	0.000111182	NA	0.431947	FALSE	FALSE	FALSE	0.00155654	0.94	TRUE	2	232408743	0.0107452	6.7214e-06	20.3744
childhood absence epilepsy || id:ieu-b-13	ebi-a-GCST90017071	genus Subdoligranulum id.2070	rs2114677	C	T	C	T	-0.104176	-0.00170745	NA	0.0639434	FALSE	FALSE	FALSE	0.00313565	0.59	TRUE	10	125472937	0.0230829	2.71725e-06	20.3683
childhood absence epilepsy || id:ieu-b-13	ebi-a-GCST90017071	genus Subdoligranulum id.2070	rs4347804	G	A	G	A	-0.166063	0.00249414	NA	0.963333	FALSE	FALSE	FALSE	0.00407024	0.54	TRUE	2	218215847	0.0357483	2.18404e-06	21.5792
childhood absence epilepsy || id:ieu-b-13	ebi-a-GCST90017071	genus Subdoligranulum id.2070	rs6555306	C	T	C	T	0.0740777	-0.00315201	NA	0.871295	FALSE	FALSE	FALSE	0.00229942	0.17	TRUE	5	4671383	0.0155463	2.80666e-06	22.705
childhood absence epilepsy || id:ieu-b-13	ebi-a-GCST90017071	genus Subdoligranulum id.2070	rs75158211	T	C	T	C	-0.072343	-0.000629642	NA	0.12374	FALSE	FALSE	FALSE	0.00236537	0.79	TRUE	19	29644694	0.015933	7.5216e-06	20.6157
childhood absence epilepsy || id:ieu-b-13	ebi-a-GCST90017071	genus Subdoligranulum id.2070	rs76528319	G	T	G	T	-0.143279	0.00164823	NA	0.0473031	FALSE	FALSE	FALSE	0.0036156	0.649999	TRUE	5	117799448	0.0310662	7.41396e-06	21.271
childhood absence epilepsy || id:ieu-b-13	ebi-a-GCST90017072	genus Sutterella id.2896	rs1145877	G	A	G	A	0.073548	-0.000332908	NA	0.847186	FALSE	FALSE	FALSE	0.00215954	0.88	TRUE	6	82386821	0.0162413	7.19946e-06	20.5069
childhood absence epilepsy || id:ieu-b-13	ebi-a-GCST90017072	genus Sutterella id.2896	rs11591622	T	G	T	G	-0.0688382	-0.00100074	NA	0.232619	FALSE	FALSE	FALSE	0.00182711	0.58	TRUE	10	102520687	0.0151375	6.4986e-06	20.68
childhood absence epilepsy || id:ieu-b-13	ebi-a-GCST90017072	genus Sutterella id.2896	rs13173038	A	G	A	G	-0.0718076	0.00215196	NA	0.20578	FALSE	FALSE	FALSE	0.00191201	0.26	TRUE	5	58499183	0.0151627	2.72986e-06	22.4279
childhood absence epilepsy || id:ieu-b-13	ebi-a-GCST90017072	genus Sutterella id.2896	rs2050185	A	G	A	G	-0.0575138	-0.000377507	NA	0.622278	FALSE	FALSE	FALSE	0.0015828	0.81	TRUE	6	147936781	0.0128766	7.96948e-06	19.9499
childhood absence epilepsy || id:ieu-b-13	ebi-a-GCST90017072	genus Sutterella id.2896	rs2321387	G	A	G	A	-0.0592876	-0.00191659	NA	0.461813	FALSE	FALSE	FALSE	0.0015534	0.22	TRUE	13	58689340	0.0124509	1.86518e-06	22.6739
childhood absence epilepsy || id:ieu-b-13	ebi-a-GCST90017072	genus Sutterella id.2896	rs2613606	T	C	T	C	0.0556794	0.00215151	NA	0.569783	FALSE	FALSE	FALSE	0.00156046	0.17	TRUE	7	111285025	0.0124117	7.20228e-06	20.1246
childhood absence epilepsy || id:ieu-b-13	ebi-a-GCST90017072	genus Sutterella id.2896	rs7499539	A	G	A	G	0.0617478	-0.000819693	NA	0.31047	FALSE	FALSE	FALSE	0.00166667	0.62	TRUE	16	85038065	0.0130998	2.35771e-06	22.2184
childhood absence epilepsy || id:ieu-b-13	ebi-a-GCST90017072	genus Sutterella id.2896	rs7638039	T	C	T	C	0.0645624	0.00124671	NA	0.240122	FALSE	FALSE	FALSE	0.00181846	0.49	TRUE	3	70588939	0.0143887	8.66403e-06	20.1334
childhood absence epilepsy || id:ieu-b-13	ebi-a-GCST90017072	genus Sutterella id.2896	rs9350083	T	G	T	G	-0.0593069	-0.00402754	NA	0.309958	FALSE	FALSE	FALSE	0.00165769	0.015	TRUE	6	18583878	0.0133929	8.22773e-06	19.6093
childhood absence epilepsy || id:ieu-b-13	ebi-a-GCST90017073	genus Terrisporobacter id.11348	rs2569953	C	A	C	A	0.0775591	-0.000582299	NA	0.552416	FALSE	FALSE	FALSE	0.00154823	0.709999	TRUE	3	144148905	0.0174641	8.95014e-06	19.723
childhood absence epilepsy || id:ieu-b-13	ebi-a-GCST90017073	genus Terrisporobacter id.11348	rs2872237	A	C	A	C	0.0814505	0.000790803	NA	0.596346	FALSE	FALSE	FALSE	0.00157579	0.62	TRUE	19	17026940	0.0175943	3.97137e-06	21.4311
childhood absence epilepsy || id:ieu-b-13	ebi-a-GCST90017073	genus Terrisporobacter id.11348	rs58405430	G	T	G	T	0.134617	0.00119045	NA	0.0997666	FALSE	FALSE	FALSE	0.00256604	0.64	TRUE	11	20621043	0.0301177	7.93707e-06	19.9782
childhood absence epilepsy || id:ieu-b-13	ebi-a-GCST90017090	order Actinomycetales id.420	rs2889192	T	G	T	G	-0.0884052	-0.000946056	NA	0.78175	FALSE	FALSE	FALSE	0.00186812	0.61	TRUE	9	76394568	0.0194997	3.96725e-06	20.5542
childhood absence epilepsy || id:ieu-b-13	ebi-a-GCST90017090	order Actinomycetales id.420	rs34583783	G	T	G	T	0.123688	-0.00334917	NA	0.108226	FALSE	FALSE	FALSE	0.00247019	0.18	TRUE	6	67207371	0.0264254	5.53886e-06	21.9085
childhood absence epilepsy || id:ieu-b-13	ebi-a-GCST90017091	order Bacillales id.1674	rs10233278	T	C	T	C	-0.116319	-8.08444e-05	NA	0.436051	FALSE	FALSE	FALSE	0.00153766	0.96	TRUE	7	117496144	0.0248527	3.508e-06	21.9056
childhood absence epilepsy || id:ieu-b-13	ebi-a-GCST90017091	order Bacillales id.1674	rs10410917	C	T	C	T	-0.11471	-0.000387315	NA	0.418374	FALSE	FALSE	FALSE	0.00155739	0.8	TRUE	19	14970441	0.0250025	5.57353e-06	21.0492
childhood absence epilepsy || id:ieu-b-13	ebi-a-GCST90017091	order Bacillales id.1674	rs1287018	G	A	G	A	0.141125	-0.00259964	NA	0.180363	FALSE	FALSE	FALSE	0.00200802	0.2	TRUE	20	5826474	0.0319309	9.87097e-06	19.5337
childhood absence epilepsy || id:ieu-b-13	ebi-a-GCST90017091	order Bacillales id.1674	rs62640857	A	G	A	G	0.148238	0.00162525	NA	0.181892	FALSE	FALSE	FALSE	0.00203549	0.42	TRUE	12	69332975	0.0326455	4.49262e-06	20.6192
childhood absence epilepsy || id:ieu-b-13	ebi-a-GCST90017091	order Bacillales id.1674	rs74420793	A	G	A	G	-0.164413	-0.00301593	NA	0.151816	FALSE	FALSE	FALSE	0.00213533	0.16	TRUE	4	127766709	0.0353763	3.07319e-06	21.5997
childhood absence epilepsy || id:ieu-b-13	ebi-a-GCST90017092	order Bacteroidales id.913	rs111845179	T	C	T	C	0.102648	-0.0015966	NA	0.0543744	FALSE	FALSE	FALSE	0.00339122	0.64	TRUE	14	59317502	0.0213843	9.23996e-07	23.0415
childhood absence epilepsy || id:ieu-b-13	ebi-a-GCST90017092	order Bacteroidales id.913	rs17343978	A	C	A	C	-0.0552057	0.00179739	NA	0.257978	FALSE	FALSE	FALSE	0.00176292	0.31	TRUE	22	27433885	0.0120278	8.3593e-06	21.0666
childhood absence epilepsy || id:ieu-b-13	ebi-a-GCST90017092	order Bacteroidales id.913	rs2032750	C	T	C	T	0.0508393	0.000179946	NA	0.535338	FALSE	FALSE	FALSE	0.00154438	0.91	TRUE	2	53831026	0.0106807	1.91509e-06	22.6569
childhood absence epilepsy || id:ieu-b-13	ebi-a-GCST90017092	order Bacteroidales id.913	rs55773148	G	A	G	A	-0.121514	0.00673667	NA	0.0516556	FALSE	FALSE	FALSE	0.00346389	0.0519996	TRUE	13	70523029	0.0236759	3.89583e-07	26.3414
childhood absence epilepsy || id:ieu-b-13	ebi-a-GCST90017092	order Bacteroidales id.913	rs62531359	T	G	T	G	0.0655728	-0.00266495	NA	0.135494	FALSE	FALSE	FALSE	0.00225239	0.24	TRUE	8	70916181	0.0149891	9.08657e-06	19.138
childhood absence epilepsy || id:ieu-b-13	ebi-a-GCST90017092	order Bacteroidales id.913	rs7631304	G	A	G	A	-0.0645771	0.000805704	NA	0.18535	FALSE	FALSE	FALSE	0.00197246	0.68	TRUE	3	89339527	0.0132957	8.36778e-07	23.5904
childhood absence epilepsy || id:ieu-b-13	ebi-a-GCST90017092	order Bacteroidales id.913	rs79585701	A	C	A	C	0.0646823	-0.00401304	NA	0.146079	FALSE	FALSE	FALSE	0.00216631	0.064	TRUE	8	13110185	0.0149628	9.98596e-06	18.6872
childhood absence epilepsy || id:ieu-b-13	ebi-a-GCST90017092	order Bacteroidales id.913	rs929878	T	C	T	C	0.0548532	6.63196e-05	NA	0.742688	FALSE	FALSE	FALSE	0.00174762	0.97	TRUE	16	74290641	0.012153	4.7338e-06	20.3722
childhood absence epilepsy || id:ieu-b-13	ebi-a-GCST90017093	order Bifidobacteriales id.432	rs10831953	G	A	G	A	0.0537537	0.00189261	NA	0.347135	FALSE	FALSE	FALSE	0.00162018	0.24	TRUE	11	13098051	0.0123746	9.94741e-06	18.8692
childhood absence epilepsy || id:ieu-b-13	ebi-a-GCST90017093	order Bifidobacteriales id.432	rs55888705	A	G	A	G	0.053673	0.00178503	NA	0.364234	FALSE	FALSE	FALSE	0.00160834	0.27	TRUE	4	1517826	0.0120586	8.66204e-06	19.8115
childhood absence epilepsy || id:ieu-b-13	ebi-a-GCST90017093	order Bifidobacteriales id.432	rs6899771	A	G	A	G	-0.0914312	0.00198249	NA	0.0888353	FALSE	FALSE	FALSE	0.00268497	0.46	TRUE	6	97406220	0.0202604	7.27998e-06	20.3654
childhood absence epilepsy || id:ieu-b-13	ebi-a-GCST90017093	order Bifidobacteriales id.432	rs7174549	T	C	T	C	-0.0551726	0.00181551	NA	0.660333	FALSE	FALSE	FALSE	0.00163219	0.27	TRUE	15	92463303	0.0124655	6.86784e-06	19.5897
childhood absence epilepsy || id:ieu-b-13	ebi-a-GCST90017093	order Bifidobacteriales id.432	rs857444	C	T	C	T	0.0553965	-0.000855925	NA	0.349909	FALSE	FALSE	FALSE	0.00159483	0.59	TRUE	6	14617591	0.0120669	3.8249e-06	21.0753
childhood absence epilepsy || id:ieu-b-13	ebi-a-GCST90017094	order Burkholderiales id.2874	rs1511453	A	G	A	G	0.0910999	0.000230518	NA	0.0626243	FALSE	FALSE	FALSE	0.00318355	0.94	TRUE	4	23588462	0.0199479	8.00092e-06	20.8565
childhood absence epilepsy || id:ieu-b-13	ebi-a-GCST90017094	order Burkholderiales id.2874	rs1928341	G	A	G	A	-0.0507782	-9.88791e-05	NA	0.58774	FALSE	FALSE	FALSE	0.00159608	0.95	TRUE	1	153240013	0.0110587	4.51513e-06	21.0837
childhood absence epilepsy || id:ieu-b-13	ebi-a-GCST90017094	order Burkholderiales id.2874	rs2321387	G	A	G	A	-0.0508514	-0.00191659	NA	0.461813	FALSE	FALSE	FALSE	0.0015534	0.22	TRUE	13	58689340	0.0109588	3.25784e-06	21.5318
childhood absence epilepsy || id:ieu-b-13	ebi-a-GCST90017094	order Burkholderiales id.2874	rs2613606	T	C	T	C	0.0499561	0.00215151	NA	0.569783	FALSE	FALSE	FALSE	0.00156046	0.17	TRUE	7	111285025	0.0109264	4.13361e-06	20.9037
childhood absence epilepsy || id:ieu-b-13	ebi-a-GCST90017094	order Burkholderiales id.2874	rs4033856	T	C	T	C	-0.0833445	0.00551282	NA	0.883164	FALSE	FALSE	FALSE	0.00244337	0.0239999	TRUE	4	45642485	0.0167489	5.66826e-07	24.7617
childhood absence epilepsy || id:ieu-b-13	ebi-a-GCST90017094	order Burkholderiales id.2874	rs6087811	T	G	T	G	-0.101587	-0.00242131	NA	0.0754257	FALSE	FALSE	FALSE	0.00294062	0.41	TRUE	20	30596130	0.0198817	2.88377e-07	26.1077
childhood absence epilepsy || id:ieu-b-13	ebi-a-GCST90017094	order Burkholderiales id.2874	rs62395635	T	C	T	C	0.109911	0.0029725	NA	0.0606494	FALSE	FALSE	FALSE	0.00325607	0.36	TRUE	5	173497796	0.0236375	2.90228e-06	21.6212
childhood absence epilepsy || id:ieu-b-13	ebi-a-GCST90017094	order Burkholderiales id.2874	rs7638039	T	C	T	C	0.0580987	0.00124671	NA	0.240122	FALSE	FALSE	FALSE	0.00181846	0.49	TRUE	3	70588939	0.012673	4.83593e-06	21.0172
childhood absence epilepsy || id:ieu-b-13	ebi-a-GCST90017094	order Burkholderiales id.2874	rs9964679	A	G	A	G	0.052509	-0.00117939	NA	0.30929	FALSE	FALSE	FALSE	0.00168067	0.48	TRUE	18	26569901	0.011504	6.05982e-06	20.8339
childhood absence epilepsy || id:ieu-b-13	ebi-a-GCST90017095	order Clostridiales id.1863	rs13179700	C	T	C	T	-0.0510953	0.00252823	NA	0.654671	FALSE	FALSE	FALSE	0.00161153	0.12	TRUE	5	149077788	0.0109569	3.52111e-06	21.7464
childhood absence epilepsy || id:ieu-b-13	ebi-a-GCST90017095	order Clostridiales id.1863	rs1842454	G	A	G	A	-0.0543676	-0.00295386	NA	0.223293	FALSE	FALSE	FALSE	0.0018528	0.11	TRUE	5	105060362	0.012734	9.91745e-06	18.2285
childhood absence epilepsy || id:ieu-b-13	ebi-a-GCST90017095	order Clostridiales id.1863	rs290772	G	A	G	A	0.084254	-0.00236342	NA	0.0744753	FALSE	FALSE	FALSE	0.00295285	0.42	TRUE	2	102126220	0.0196297	9.9977e-06	18.4227
childhood absence epilepsy || id:ieu-b-13	ebi-a-GCST90017095	order Clostridiales id.1863	rs6442336	T	C	T	C	0.0547729	-0.000952767	NA	0.776147	FALSE	FALSE	FALSE	0.0018817	0.61	TRUE	3	12870886	0.0124169	9.62565e-06	19.4583
childhood absence epilepsy || id:ieu-b-13	ebi-a-GCST90017095	order Clostridiales id.1863	rs6814436	C	T	C	T	-0.0741858	-0.000788806	NA	0.859428	FALSE	FALSE	FALSE	0.00220546	0.719999	TRUE	4	161507301	0.0150814	9.06296e-07	24.1968
childhood absence epilepsy || id:ieu-b-13	ebi-a-GCST90017095	order Clostridiales id.1863	rs6815608	C	T	C	T	-0.104089	-0.000271314	NA	0.939014	FALSE	FALSE	FALSE	0.00320468	0.93	TRUE	4	152131744	0.0210883	3.71989e-07	24.3628
childhood absence epilepsy || id:ieu-b-13	ebi-a-GCST90017095	order Clostridiales id.1863	rs992074	T	C	T	C	-0.255441	0.0063947	NA	0.952984	FALSE	FALSE	FALSE	0.00365874	0.0810009	TRUE	21	18567802	0.0508788	8.95385e-07	25.2062
childhood absence epilepsy || id:ieu-b-13	ebi-a-GCST90017096	order Coriobacteriales id.810	rs11250875	T	C	T	C	0.06075	0.000776443	NA	0.207617	FALSE	FALSE	FALSE	0.00189169	0.68	TRUE	10	1922731	0.0130939	4.82848e-06	21.5256
childhood absence epilepsy || id:ieu-b-13	ebi-a-GCST90017096	order Coriobacteriales id.810	rs1816223	G	A	G	A	0.0586265	-0.00281235	NA	0.789259	FALSE	FALSE	FALSE	0.00186818	0.13	TRUE	12	11494021	0.0129006	4.84117e-06	20.6523
childhood absence epilepsy || id:ieu-b-13	ebi-a-GCST90017096	order Coriobacteriales id.810	rs2442778	A	G	A	G	0.116408	0.00792356	NA	0.948931	FALSE	FALSE	FALSE	0.00348839	0.0230001	TRUE	3	11654412	0.0258545	9.02693e-06	20.2718
childhood absence epilepsy || id:ieu-b-13	ebi-a-GCST90017096	order Coriobacteriales id.810	rs719099	A	G	A	G	0.0778402	-0.00187986	NA	0.115403	FALSE	FALSE	FALSE	0.00240913	0.44	TRUE	10	65799217	0.0155815	5.43313e-07	24.9568
childhood absence epilepsy || id:ieu-b-13	ebi-a-GCST90017096	order Coriobacteriales id.810	rs8010111	A	G	A	G	0.103377	-0.00039206	NA	0.932689	FALSE	FALSE	FALSE	0.00307645	0.9	TRUE	14	39660509	0.0229286	6.8962e-06	20.3279
childhood absence epilepsy || id:ieu-b-13	ebi-a-GCST90017097	order Desulfovibrionales id.3156	rs112381107	C	T	C	T	0.21009	0.000286921	NA	0.0497705	FALSE	FALSE	FALSE	0.00352758	0.94	TRUE	9	15269705	0.0456974	3.21655e-06	21.1362
childhood absence epilepsy || id:ieu-b-13	ebi-a-GCST90017097	order Desulfovibrionales id.3156	rs11599763	C	T	C	T	0.0554862	0.000651645	NA	0.615628	FALSE	FALSE	FALSE	0.00160988	0.69	TRUE	10	11855599	0.0117486	2.60699e-06	22.3048
childhood absence epilepsy || id:ieu-b-13	ebi-a-GCST90017097	order Desulfovibrionales id.3156	rs3935584	C	T	C	T	-0.0524466	-1.45575e-05	NA	0.499012	FALSE	FALSE	FALSE	0.00152552	0.99	TRUE	2	233929283	0.0115749	7.19747e-06	20.5305
childhood absence epilepsy || id:ieu-b-13	ebi-a-GCST90017097	order Desulfovibrionales id.3156	rs6058181	C	T	C	T	0.0836765	-0.00207549	NA	0.124315	FALSE	FALSE	FALSE	0.00232564	0.37	TRUE	20	33694801	0.0166098	2.52773e-07	25.3792
childhood absence epilepsy || id:ieu-b-13	ebi-a-GCST90017097	order Desulfovibrionales id.3156	rs62020470	A	G	A	G	-0.0573633	-0.00228081	NA	0.271271	FALSE	FALSE	FALSE	0.0017346	0.19	TRUE	15	96161065	0.0129462	7.50983e-06	19.6329
childhood absence epilepsy || id:ieu-b-13	ebi-a-GCST90017097	order Desulfovibrionales id.3156	rs72647048	T	C	T	C	-0.0772459	-0.00400544	NA	0.114372	FALSE	FALSE	FALSE	0.00240618	0.0959997	TRUE	8	57865378	0.0170876	9.00285e-06	20.4357
childhood absence epilepsy || id:ieu-b-13	ebi-a-GCST90017097	order Desulfovibrionales id.3156	rs9928243	C	A	C	A	-0.0544713	0.00038862	NA	0.415357	FALSE	FALSE	FALSE	0.00155817	0.8	TRUE	16	71541641	0.0117811	3.96634e-06	21.3778
childhood absence epilepsy || id:ieu-b-13	ebi-a-GCST90017098	order Enterobacteriales id.3468	rs2374342	C	A	C	A	0.0582927	-0.000499033	NA	0.359383	FALSE	FALSE	FALSE	0.00159437	0.75	TRUE	2	42133542	0.0126195	4.51617e-06	21.3375
childhood absence epilepsy || id:ieu-b-13	ebi-a-GCST90017098	order Enterobacteriales id.3468	rs504442	T	G	T	G	0.084159	0.000998545	NA	0.11698	FALSE	FALSE	FALSE	0.00240023	0.68	TRUE	18	55145547	0.0189479	5.17095e-06	19.7278
childhood absence epilepsy || id:ieu-b-13	ebi-a-GCST90017099	order Erysipelotrichales id.2148	rs10781552	C	T	C	T	-0.0552212	-0.000875943	NA	0.30716	FALSE	FALSE	FALSE	0.00167973	0.6	TRUE	10	133897233	0.0116074	2.33115e-06	22.633
childhood absence epilepsy || id:ieu-b-13	ebi-a-GCST90017099	order Erysipelotrichales id.2148	rs1884466	C	T	C	T	-0.0475363	-0.00325764	NA	0.395298	FALSE	FALSE	FALSE	0.00158381	0.04	TRUE	1	64139196	0.0106939	9.52708e-06	19.7596
childhood absence epilepsy || id:ieu-b-13	ebi-a-GCST90017099	order Erysipelotrichales id.2148	rs2300774	A	G	A	G	-0.0524152	-0.0011747	NA	0.610035	FALSE	FALSE	FALSE	0.00157884	0.46	TRUE	3	195793712	0.0106784	8.95468e-07	24.0936
childhood absence epilepsy || id:ieu-b-13	ebi-a-GCST90017099	order Erysipelotrichales id.2148	rs35161940	T	C	T	C	-0.0806041	0.00406517	NA	0.107423	FALSE	FALSE	FALSE	0.00250515	0.1	TRUE	17	70327224	0.0167641	1.8451e-06	23.1182
childhood absence epilepsy || id:ieu-b-13	ebi-a-GCST90017099	order Erysipelotrichales id.2148	rs56970041	T	G	T	G	0.0724145	-0.000690607	NA	0.0991089	FALSE	FALSE	FALSE	0.00258506	0.79	TRUE	14	80357610	0.0164471	5.40344e-06	19.3853
childhood absence epilepsy || id:ieu-b-13	ebi-a-GCST90017099	order Erysipelotrichales id.2148	rs7234058	T	C	T	C	-0.0945759	-0.00309405	NA	0.0908211	FALSE	FALSE	FALSE	0.00271453	0.25	TRUE	18	5830507	0.0194091	9.12347e-07	23.7438
childhood absence epilepsy || id:ieu-b-13	ebi-a-GCST90017099	order Erysipelotrichales id.2148	rs8003149	C	T	C	T	0.0538798	0.0013523	NA	0.27638	FALSE	FALSE	FALSE	0.0017159	0.43	TRUE	14	56156504	0.0116888	4.08479e-06	21.2477
childhood absence epilepsy || id:ieu-b-13	ebi-a-GCST90017100	order Gastranaerophilales id.1591	rs11150282	T	C	T	C	0.098235	-0.00599727	NA	0.316864	FALSE	FALSE	FALSE	0.00165437	0.000290001	TRUE	16	80493705	0.0197127	7.36055e-07	24.8336
childhood absence epilepsy || id:ieu-b-13	ebi-a-GCST90017100	order Gastranaerophilales id.1591	rs113884518	T	C	T	C	-0.20591	-0.00637157	NA	0.050581	FALSE	FALSE	FALSE	0.00351704	0.0700003	TRUE	9	24648997	0.0455376	7.7398e-06	20.4463
childhood absence epilepsy || id:ieu-b-13	ebi-a-GCST90017100	order Gastranaerophilales id.1591	rs367480	A	G	A	G	0.0841649	0.00114778	NA	0.577329	FALSE	FALSE	FALSE	0.00155697	0.46	TRUE	11	2937631	0.0185948	7.52419e-06	20.487
childhood absence epilepsy || id:ieu-b-13	ebi-a-GCST90017100	order Gastranaerophilales id.1591	rs4129395	G	A	G	A	0.0904264	0.000108895	NA	0.441551	FALSE	FALSE	FALSE	0.00156289	0.94	TRUE	9	115975389	0.0185253	1.21742e-06	23.8265
childhood absence epilepsy || id:ieu-b-13	ebi-a-GCST90017100	order Gastranaerophilales id.1591	rs789069	A	C	A	C	-0.10413	-0.00195482	NA	0.175794	FALSE	FALSE	FALSE	0.00202284	0.33	TRUE	18	1008278	0.0234459	6.5001e-06	19.725
childhood absence epilepsy || id:ieu-b-13	ebi-a-GCST90017100	order Gastranaerophilales id.1591	rs8028558	A	G	A	G	0.08346	0.00392619	NA	0.390963	FALSE	FALSE	FALSE	0.00158191	0.0129999	TRUE	15	62055753	0.0188504	9.78228e-06	19.6027
childhood absence epilepsy || id:ieu-b-13	ebi-a-GCST90017100	order Gastranaerophilales id.1591	rs9864379	T	C	T	C	-0.160521	0.00176626	NA	0.106932	FALSE	FALSE	FALSE	0.00248599	0.48	TRUE	3	14306949	0.0292752	4.65876e-08	30.0652
childhood absence epilepsy || id:ieu-b-13	ebi-a-GCST90017101	order Lactobacillales id.1800	rs11110282	A	G	A	G	-0.10239	0.00265454	NA	0.0619158	FALSE	FALSE	FALSE	0.00317857	0.4	TRUE	12	100585559	0.0217849	3.95667e-06	22.0904
childhood absence epilepsy || id:ieu-b-13	ebi-a-GCST90017101	order Lactobacillales id.1800	rs11627423	C	A	C	A	0.0499263	-0.00252996	NA	0.398948	FALSE	FALSE	FALSE	0.00157696	0.11	TRUE	14	33200623	0.0109744	5.08757e-06	20.6965
childhood absence epilepsy || id:ieu-b-13	ebi-a-GCST90017101	order Lactobacillales id.1800	rs11730038	G	A	G	A	-0.0605384	-0.00419282	NA	0.227886	FALSE	FALSE	FALSE	0.00182414	0.0219999	TRUE	4	98049499	0.0129052	5.09742e-06	22.0056
childhood absence epilepsy || id:ieu-b-13	ebi-a-GCST90017101	order Lactobacillales id.1800	rs1595463	C	A	C	A	0.0479749	-0.000899684	NA	0.474988	FALSE	FALSE	FALSE	0.00157614	0.57	TRUE	2	231723657	0.0108801	7.44355e-06	19.443
childhood absence epilepsy || id:ieu-b-13	ebi-a-GCST90017101	order Lactobacillales id.1800	rs4028634	C	T	C	T	-0.0532915	0.00201989	NA	0.603691	FALSE	FALSE	FALSE	0.00158311	0.2	TRUE	17	40835649	0.01101	1.34806e-06	23.4283
childhood absence epilepsy || id:ieu-b-13	ebi-a-GCST90017101	order Lactobacillales id.1800	rs57872228	C	T	C	T	-0.0688415	0.00129088	NA	0.150909	FALSE	FALSE	FALSE	0.00217826	0.55	TRUE	1	200418805	0.0146994	2.5825e-06	21.9332
childhood absence epilepsy || id:ieu-b-13	ebi-a-GCST90017102	order Methanobacteriales id.120	rs10202904	G	T	G	T	0.121754	-0.00339672	NA	0.577454	FALSE	FALSE	FALSE	0.00155454	0.0290001	TRUE	2	125440268	0.0235357	3.01432e-07	26.7616
childhood absence epilepsy || id:ieu-b-13	ebi-a-GCST90017102	order Methanobacteriales id.120	rs56131665	G	A	G	A	0.178661	-0.000128433	NA	0.0926134	FALSE	FALSE	FALSE	0.00270231	0.96	TRUE	5	178160975	0.039298	6.17988e-06	20.669
childhood absence epilepsy || id:ieu-b-13	ebi-a-GCST90017102	order Methanobacteriales id.120	rs6776814	T	C	T	C	-0.199566	-0.0029106	NA	0.0905988	FALSE	FALSE	FALSE	0.00268246	0.28	TRUE	3	15053083	0.0411825	1.63061e-06	23.4827
childhood absence epilepsy || id:ieu-b-13	ebi-a-GCST90017102	order Methanobacteriales id.120	rs73068003	G	T	G	T	-0.15814	-0.00189399	NA	0.123415	FALSE	FALSE	FALSE	0.00237931	0.43	TRUE	7	10773932	0.0351803	8.44578e-06	20.2062
childhood absence epilepsy || id:ieu-b-13	ebi-a-GCST90017102	order Methanobacteriales id.120	rs73457410	A	G	A	G	0.21534	-0.000257506	NA	0.0728292	FALSE	FALSE	FALSE	0.00298052	0.93	TRUE	13	41956181	0.0436695	1.40854e-06	24.316
childhood absence epilepsy || id:ieu-b-13	ebi-a-GCST90017102	order Methanobacteriales id.120	rs75208022	C	T	C	T	-0.227245	8.18229e-05	NA	0.0713594	FALSE	FALSE	FALSE	0.00297578	0.98	TRUE	12	21338861	0.048763	5.92107e-06	21.7174
childhood absence epilepsy || id:ieu-b-13	ebi-a-GCST90017102	order Methanobacteriales id.120	rs894996	C	A	C	A	0.216999	-0.00103535	NA	0.0771305	FALSE	FALSE	FALSE	0.00288544	0.719999	TRUE	4	104418307	0.0449076	1.87556e-06	23.3494
childhood absence epilepsy || id:ieu-b-13	ebi-a-GCST90017103	order Mollicutes RF9 id.11579	rs11779863	G	A	G	A	-0.0772768	0.000917907	NA	0.206584	FALSE	FALSE	FALSE	0.0019015	0.630001	TRUE	8	15406830	0.0172171	6.68852e-06	20.1455
childhood absence epilepsy || id:ieu-b-13	ebi-a-GCST90017103	order Mollicutes RF9 id.11579	rs12566890	T	G	T	G	-0.103134	0.00343213	NA	0.0804591	FALSE	FALSE	FALSE	0.00283603	0.23	TRUE	1	61850864	0.0241775	8.11204e-06	18.1962
childhood absence epilepsy || id:ieu-b-13	ebi-a-GCST90017103	order Mollicutes RF9 id.11579	rs13100746	C	T	C	T	0.0638979	-0.00231621	NA	0.392994	FALSE	FALSE	FALSE	0.0015708	0.14	TRUE	3	165846506	0.0142685	7.28853e-06	20.0547
childhood absence epilepsy || id:ieu-b-13	ebi-a-GCST90017103	order Mollicutes RF9 id.11579	rs3932485	C	T	C	T	0.0626209	0.000419477	NA	0.405186	FALSE	FALSE	FALSE	0.00157453	0.79	TRUE	3	184193482	0.0141623	9.92865e-06	19.5511
childhood absence epilepsy || id:ieu-b-13	ebi-a-GCST90017103	order Mollicutes RF9 id.11579	rs638542	A	G	A	G	0.070592	-0.00111036	NA	0.723788	FALSE	FALSE	FALSE	0.00172059	0.52	TRUE	1	109845252	0.0157049	5.17285e-06	20.2042
childhood absence epilepsy || id:ieu-b-13	ebi-a-GCST90017103	order Mollicutes RF9 id.11579	rs7801843	A	G	A	G	-0.0869495	-0.00135403	NA	0.142697	FALSE	FALSE	FALSE	0.00219811	0.54	TRUE	7	4105705	0.0194509	9.46891e-06	19.9827
childhood absence epilepsy || id:ieu-b-13	ebi-a-GCST90017103	order Mollicutes RF9 id.11579	rs949341	A	G	A	G	-0.0656602	-0.00172196	NA	0.667518	FALSE	FALSE	FALSE	0.00164384	0.29	TRUE	11	112386785	0.0147216	7.73286e-06	19.8927
childhood absence epilepsy || id:ieu-b-13	ebi-a-GCST90017104	order NB1n id.3953	rs11606187	A	G	A	G	-0.154539	0.00163216	NA	0.105008	FALSE	FALSE	FALSE	0.00250091	0.51	TRUE	11	91589600	0.0326288	3.30583e-06	22.4323
childhood absence epilepsy || id:ieu-b-13	ebi-a-GCST90017104	order NB1n id.3953	rs13385922	T	C	T	C	0.0929494	0.00130043	NA	0.389803	FALSE	FALSE	FALSE	0.00159055	0.41	TRUE	2	234081324	0.0201348	3.96826e-06	21.3107
childhood absence epilepsy || id:ieu-b-13	ebi-a-GCST90017104	order NB1n id.3953	rs166849	A	G	A	G	-0.0911053	-0.00359809	NA	0.594574	FALSE	FALSE	FALSE	0.00155794	0.021	TRUE	2	200778866	0.0202239	7.73891e-06	20.2935
childhood absence epilepsy || id:ieu-b-13	ebi-a-GCST90017104	order NB1n id.3953	rs2172426	T	C	T	C	0.10212	-0.00100259	NA	0.559031	FALSE	FALSE	FALSE	0.00156777	0.52	TRUE	8	18229020	0.0198947	3.17424e-07	26.3479
childhood absence epilepsy || id:ieu-b-13	ebi-a-GCST90017104	order NB1n id.3953	rs267959	G	A	G	A	-0.0988612	0.00146571	NA	0.680597	FALSE	FALSE	FALSE	0.00163827	0.37	TRUE	5	10737802	0.0209676	2.61993e-06	22.2308
childhood absence epilepsy || id:ieu-b-13	ebi-a-GCST90017104	order NB1n id.3953	rs4383094	C	T	C	T	-0.149188	0.00347634	NA	0.888639	FALSE	FALSE	FALSE	0.00244121	0.15	TRUE	15	81694972	0.0320662	4.28134e-06	21.6458
childhood absence epilepsy || id:ieu-b-13	ebi-a-GCST90017104	order NB1n id.3953	rs60775321	T	C	T	C	-0.0962425	0.000935495	NA	0.313533	FALSE	FALSE	FALSE	0.00168964	0.58	TRUE	15	97318671	0.0213842	7.10461e-06	20.2557
childhood absence epilepsy || id:ieu-b-13	ebi-a-GCST90017104	order NB1n id.3953	rs72671304	T	C	T	C	0.172322	0.00181751	NA	0.0768953	FALSE	FALSE	FALSE	0.0028576	0.52	TRUE	14	39425971	0.0370028	3.79577e-06	21.6876
childhood absence epilepsy || id:ieu-b-13	ebi-a-GCST90017104	order NB1n id.3953	rs7911787	G	T	G	T	-0.223071	-0.00365031	NA	0.0551172	FALSE	FALSE	FALSE	0.00336191	0.28	TRUE	10	98619568	0.0470232	3.38821e-06	22.5041
childhood absence epilepsy || id:ieu-b-13	ebi-a-GCST90017104	order NB1n id.3953	rs8126061	T	C	T	C	-0.159135	0.000512574	NA	0.0836575	FALSE	FALSE	FALSE	0.00278745	0.85	TRUE	20	3405239	0.0351904	7.36326e-06	20.4495
childhood absence epilepsy || id:ieu-b-13	ebi-a-GCST90017104	order NB1n id.3953	rs9542068	T	C	T	C	0.0990709	0.00199966	NA	0.271758	FALSE	FALSE	FALSE	0.00173209	0.25	TRUE	13	70306831	0.0218149	6.52334e-06	20.6246
childhood absence epilepsy || id:ieu-b-13	ebi-a-GCST90017105	order Pasteurellales id.3688	rs10965428	C	A	C	A	-0.119902	0.00195453	NA	0.0838743	FALSE	FALSE	FALSE	0.00277353	0.48	TRUE	9	22718481	0.0258219	4.29151e-06	21.5614
childhood absence epilepsy || id:ieu-b-13	ebi-a-GCST90017105	order Pasteurellales id.3688	rs12050685	A	G	A	G	-0.0670948	3.86515e-05	NA	0.386582	FALSE	FALSE	FALSE	0.00157555	0.98	TRUE	15	73477482	0.015239	9.18523e-06	19.385
childhood absence epilepsy || id:ieu-b-13	ebi-a-GCST90017105	order Pasteurellales id.3688	rs9895850	T	C	T	C	-0.176406	-0.00697558	NA	0.0444997	FALSE	FALSE	FALSE	0.00371074	0.0599998	TRUE	17	64535013	0.041017	9.0826e-06	18.4969
childhood absence epilepsy || id:ieu-b-13	ebi-a-GCST90017106	order Rhodospirillales id.2667	rs1035406	G	A	G	A	-0.114725	-0.00255429	NA	0.109231	FALSE	FALSE	FALSE	0.00246904	0.3	TRUE	5	119372737	0.0247994	4.07165e-06	21.401
childhood absence epilepsy || id:ieu-b-13	ebi-a-GCST90017106	order Rhodospirillales id.2667	rs11591293	G	T	G	T	0.0722755	-0.0022458	NA	0.388958	FALSE	FALSE	FALSE	0.0015739	0.15	TRUE	10	113419797	0.0158186	4.68533e-06	20.8759
childhood absence epilepsy || id:ieu-b-13	ebi-a-GCST90017106	order Rhodospirillales id.2667	rs11630875	T	C	T	C	0.0945198	-0.00113379	NA	0.163652	FALSE	FALSE	FALSE	0.00209048	0.59	TRUE	15	61775734	0.0202139	3.70382e-06	21.8648
childhood absence epilepsy || id:ieu-b-13	ebi-a-GCST90017106	order Rhodospirillales id.2667	rs1549633	A	C	A	C	0.0996735	-1.46165e-05	NA	0.138196	FALSE	FALSE	FALSE	0.00225861	0.99	TRUE	5	27945645	0.0216667	3.88025e-06	21.1628
childhood absence epilepsy || id:ieu-b-13	ebi-a-GCST90017106	order Rhodospirillales id.2667	rs3730086	A	G	A	G	0.0800354	0.00190325	NA	0.233324	FALSE	FALSE	FALSE	0.00182218	0.3	TRUE	5	67577051	0.0178737	7.98252e-06	20.051
childhood absence epilepsy || id:ieu-b-13	ebi-a-GCST90017106	order Rhodospirillales id.2667	rs3754624	C	T	C	T	0.094128	0.000962808	NA	0.176233	FALSE	FALSE	FALSE	0.00200969	0.630001	TRUE	2	225633812	0.0198389	2.68368e-06	22.5114
childhood absence epilepsy || id:ieu-b-13	ebi-a-GCST90017106	order Rhodospirillales id.2667	rs4278423	T	C	T	C	0.105215	-0.00164856	NA	0.1146	FALSE	FALSE	FALSE	0.00241111	0.49	TRUE	10	2670553	0.0233778	3.98043e-06	20.2557
childhood absence epilepsy || id:ieu-b-13	ebi-a-GCST90017106	order Rhodospirillales id.2667	rs55876211	C	T	C	T	-0.0865002	0.00160113	NA	0.18636	FALSE	FALSE	FALSE	0.00196547	0.42	TRUE	3	84471266	0.0195197	7.87318e-06	19.6376
childhood absence epilepsy || id:ieu-b-13	ebi-a-GCST90017106	order Rhodospirillales id.2667	rs7001029	C	T	C	T	0.120726	0.000222267	NA	0.0964708	FALSE	FALSE	FALSE	0.00261046	0.93	TRUE	8	131958403	0.0260989	2.83067e-06	21.3972
childhood absence epilepsy || id:ieu-b-13	ebi-a-GCST90017106	order Rhodospirillales id.2667	rs76784716	A	G	A	G	0.136039	-1.42121e-05	NA	0.071977	FALSE	FALSE	FALSE	0.00297312	1	TRUE	2	169033340	0.0284399	1.31383e-06	22.8808
childhood absence epilepsy || id:ieu-b-13	ebi-a-GCST90017106	order Rhodospirillales id.2667	rs77304857	C	A	C	A	-0.0997433	-0.00198867	NA	0.135959	FALSE	FALSE	FALSE	0.00222951	0.37	TRUE	4	134248015	0.0222165	6.02033e-06	20.1565
childhood absence epilepsy || id:ieu-b-13	ebi-a-GCST90017106	order Rhodospirillales id.2667	rs9813022	A	G	A	G	-0.0830794	-0.000355958	NA	0.312305	FALSE	FALSE	FALSE	0.00165944	0.83	TRUE	3	13726736	0.0162642	3.07213e-07	26.0928
childhood absence epilepsy || id:ieu-b-13	ebi-a-GCST90017107	order Selenomonadales id.2165	rs13086907	G	A	G	A	0.0625312	-0.000649149	NA	0.211104	FALSE	FALSE	FALSE	0.00190617	0.73	TRUE	3	142135117	0.0131735	1.95488e-06	22.5316
childhood absence epilepsy || id:ieu-b-13	ebi-a-GCST90017107	order Selenomonadales id.2165	rs1643968	T	C	T	C	-0.0565284	-0.00284947	NA	0.303981	FALSE	FALSE	FALSE	0.00167992	0.0899995	TRUE	5	165266628	0.0112298	4.14601e-07	25.339
childhood absence epilepsy || id:ieu-b-13	ebi-a-GCST90017107	order Selenomonadales id.2165	rs4722181	T	G	T	G	0.0501306	0.000191905	NA	0.490024	FALSE	FALSE	FALSE	0.00153656	0.9	TRUE	7	22817571	0.0105798	2.00111e-06	22.4518
childhood absence epilepsy || id:ieu-b-13	ebi-a-GCST90017107	order Selenomonadales id.2165	rs61249479	A	C	A	C	0.0777075	-0.000111331	NA	0.0994192	FALSE	FALSE	FALSE	0.00255469	0.97	TRUE	9	124912908	0.0168628	2.95474e-06	21.2357
childhood absence epilepsy || id:ieu-b-13	ebi-a-GCST90017107	order Selenomonadales id.2165	rs9423647	G	A	G	A	0.047817	0.000498841	NA	0.505647	FALSE	FALSE	FALSE	0.00154611	0.75	TRUE	10	5579818	0.0105282	6.06108e-06	20.628
childhood absence epilepsy || id:ieu-b-13	ebi-a-GCST90017108	order Verrucomicrobiales id.4030	rs117107102	A	G	A	G	0.204683	0.00027616	NA	0.0324577	FALSE	FALSE	FALSE	0.00438483	0.95	TRUE	18	49473635	0.0431572	2.91823e-06	22.4935
childhood absence epilepsy || id:ieu-b-13	ebi-a-GCST90017108	order Verrucomicrobiales id.4030	rs11729256	T	C	T	C	0.0749798	0.00133243	NA	0.24506	FALSE	FALSE	FALSE	0.00178557	0.46	TRUE	4	95027272	0.0150177	6.73085e-07	24.9277
childhood absence epilepsy || id:ieu-b-13	ebi-a-GCST90017108	order Verrucomicrobiales id.4030	rs12908520	G	A	G	A	0.0618926	0.00237686	NA	0.442542	FALSE	FALSE	FALSE	0.0015538	0.13	TRUE	15	97570657	0.0130946	2.17165e-06	22.3405
childhood absence epilepsy || id:ieu-b-13	ebi-a-GCST90017108	order Verrucomicrobiales id.4030	rs4936098	G	A	G	A	-0.0648843	0.00092994	NA	0.635886	FALSE	FALSE	FALSE	0.00162725	0.57	TRUE	11	130280667	0.0135928	1.1222e-06	22.7856
childhood absence epilepsy || id:ieu-b-13	ebi-a-GCST90017108	order Verrucomicrobiales id.4030	rs61779207	G	A	G	A	-0.0758309	-0.000978528	NA	0.184396	FALSE	FALSE	FALSE	0.00199653	0.62	TRUE	1	41074472	0.0167762	6.7228e-06	20.4317
childhood absence epilepsy || id:ieu-b-13	ebi-a-GCST90017108	order Verrucomicrobiales id.4030	rs74542928	T	C	T	C	0.112164	0.000439203	NA	0.0949238	FALSE	FALSE	FALSE	0.00262694	0.87	TRUE	4	100544188	0.0236422	1.63222e-06	22.5077
childhood absence epilepsy || id:ieu-b-13	ebi-a-GCST90017108	order Verrucomicrobiales id.4030	rs9349825	A	G	A	G	-0.0704036	-0.00239208	NA	0.267495	FALSE	FALSE	FALSE	0.00175039	0.17	TRUE	6	56341481	0.0147128	2.53688e-06	22.8981
childhood absence epilepsy || id:ieu-b-13	ebi-a-GCST90017108	order Verrucomicrobiales id.4030	rs941682	G	A	G	A	-0.0631436	-0.00055634	NA	0.279344	FALSE	FALSE	FALSE	0.00172307	0.75	TRUE	20	31867840	0.0143767	9.60993e-06	19.2904
childhood absence epilepsy || id:ieu-b-13	ebi-a-GCST90017109	order Victivallales id.2254	rs11770843	C	T	C	T	0.109431	-1.52473e-05	NA	0.285616	FALSE	FALSE	FALSE	0.00170917	0.99	TRUE	7	146795379	0.0234879	1.9073e-06	21.7066
childhood absence epilepsy || id:ieu-b-13	ebi-a-GCST90017109	order Victivallales id.2254	rs62570196	C	T	C	T	-0.21635	0.00147909	NA	0.0642473	FALSE	FALSE	FALSE	0.00317259	0.64	TRUE	9	111086170	0.0439866	1.07924e-06	24.1921
childhood absence epilepsy || id:ieu-b-13	ebi-a-GCST90017109	order Victivallales id.2254	rs72640280	A	G	A	G	0.220207	-0.00229495	NA	0.0540293	FALSE	FALSE	FALSE	0.00342697	0.5	TRUE	1	11943792	0.0486196	5.18036e-06	20.5135
childhood absence epilepsy || id:ieu-b-13	ebi-a-GCST90017110	phylum Actinobacteria id.400	rs11766971	C	T	C	T	-0.0476376	0.00109434	NA	0.515304	FALSE	FALSE	FALSE	0.00153564	0.48	TRUE	7	155002747	0.010646	9.39918e-06	20.0229
childhood absence epilepsy || id:ieu-b-13	ebi-a-GCST90017110	phylum Actinobacteria id.400	rs12528285	C	T	C	T	0.0809469	-0.00260204	NA	0.0931804	FALSE	FALSE	FALSE	0.00266194	0.33	TRUE	6	92775210	0.0180784	5.68787e-06	20.0484
childhood absence epilepsy || id:ieu-b-13	ebi-a-GCST90017110	phylum Actinobacteria id.400	rs13192624	T	C	T	C	-0.0522862	0.0011119	NA	0.277471	FALSE	FALSE	FALSE	0.00173819	0.52	TRUE	6	113129609	0.0117742	9.32567e-06	19.7202
childhood absence epilepsy || id:ieu-b-13	ebi-a-GCST90017110	phylum Actinobacteria id.400	rs4429415	C	T	C	T	0.0581908	0.000820042	NA	0.339278	FALSE	FALSE	FALSE	0.00161504	0.61	TRUE	2	213756191	0.0111343	2.05145e-07	27.3138
childhood absence epilepsy || id:ieu-b-13	ebi-a-GCST90017110	phylum Actinobacteria id.400	rs55888705	A	G	A	G	0.0534221	0.00178503	NA	0.364234	FALSE	FALSE	FALSE	0.00160834	0.27	TRUE	4	1517826	0.0109975	1.31241e-06	23.5968
childhood absence epilepsy || id:ieu-b-13	ebi-a-GCST90017110	phylum Actinobacteria id.400	rs6496870	C	T	C	T	-0.0510777	0.0020175	NA	0.663561	FALSE	FALSE	FALSE	0.00163679	0.22	TRUE	15	92467422	0.0113809	4.61743e-06	20.1423
childhood absence epilepsy || id:ieu-b-13	ebi-a-GCST90017110	phylum Actinobacteria id.400	rs74037001	G	A	G	A	-0.0819391	-0.00203422	NA	0.127703	FALSE	FALSE	FALSE	0.00232512	0.38	TRUE	14	23847194	0.0165334	6.71243e-07	24.5617
childhood absence epilepsy || id:ieu-b-13	ebi-a-GCST90017110	phylum Actinobacteria id.400	rs857444	C	T	C	T	0.0507315	-0.000855925	NA	0.349909	FALSE	FALSE	FALSE	0.00159483	0.59	TRUE	6	14617591	0.0109885	3.80347e-06	21.3147
childhood absence epilepsy || id:ieu-b-13	ebi-a-GCST90017111	phylum Bacteroidetes id.905	rs111845179	T	C	T	C	0.104177	-0.0015966	NA	0.0543744	FALSE	FALSE	FALSE	0.00339122	0.64	TRUE	14	59317502	0.0213837	6.47187e-07	23.7344
childhood absence epilepsy || id:ieu-b-13	ebi-a-GCST90017111	phylum Bacteroidetes id.905	rs17343978	A	C	A	C	-0.0556041	0.00179739	NA	0.257978	FALSE	FALSE	FALSE	0.00176292	0.31	TRUE	22	27433885	0.0120272	7.2247e-06	21.3739
childhood absence epilepsy || id:ieu-b-13	ebi-a-GCST90017111	phylum Bacteroidetes id.905	rs2032750	C	T	C	T	0.0510857	0.000179946	NA	0.535338	FALSE	FALSE	FALSE	0.00154438	0.91	TRUE	2	53831026	0.0106804	1.70836e-06	22.8783
childhood absence epilepsy || id:ieu-b-13	ebi-a-GCST90017111	phylum Bacteroidetes id.905	rs62531359	T	G	T	G	0.0657788	-0.00266495	NA	0.135494	FALSE	FALSE	FALSE	0.00225239	0.24	TRUE	8	70916181	0.0149886	8.42326e-06	19.2597
childhood absence epilepsy || id:ieu-b-13	ebi-a-GCST90017111	phylum Bacteroidetes id.905	rs6586324	T	C	T	C	0.0477792	-0.00325558	NA	0.485934	FALSE	FALSE	FALSE	0.0015492	0.0359998	TRUE	21	43942135	0.0105437	7.36885e-06	20.5349
childhood absence epilepsy || id:ieu-b-13	ebi-a-GCST90017111	phylum Bacteroidetes id.905	rs73512608	G	A	G	A	-0.123117	0.00673241	NA	0.0516577	FALSE	FALSE	FALSE	0.0034639	0.0519996	TRUE	13	70522683	0.0236743	2.53893e-07	27.0447
childhood absence epilepsy || id:ieu-b-13	ebi-a-GCST90017111	phylum Bacteroidetes id.905	rs73846128	A	G	A	G	-0.0664262	0.000910505	NA	0.184794	FALSE	FALSE	FALSE	0.00197391	0.64	TRUE	3	89340254	0.0133481	4.783e-07	24.7651
childhood absence epilepsy || id:ieu-b-13	ebi-a-GCST90017111	phylum Bacteroidetes id.905	rs929878	T	C	T	C	0.0540001	6.63196e-05	NA	0.742688	FALSE	FALSE	FALSE	0.00174762	0.97	TRUE	16	74290641	0.0121526	6.51118e-06	19.7447
childhood absence epilepsy || id:ieu-b-13	ebi-a-GCST90017112	phylum Cyanobacteria id.1500	rs12555298	G	A	G	A	0.0974327	0.0018988	NA	0.175466	FALSE	FALSE	FALSE	0.0020483	0.35	TRUE	9	110489551	0.0219351	8.0863e-06	19.7301
childhood absence epilepsy || id:ieu-b-13	ebi-a-GCST90017112	phylum Cyanobacteria id.1500	rs7148504	T	G	T	G	-0.0800404	-0.000130898	NA	0.663152	FALSE	FALSE	FALSE	0.00163163	0.94	TRUE	14	100168298	0.0176621	6.62384e-06	20.5368
childhood absence epilepsy || id:ieu-b-13	ebi-a-GCST90017112	phylum Cyanobacteria id.1500	rs76531781	T	C	T	C	-0.231868	-0.0024868	NA	0.0471199	FALSE	FALSE	FALSE	0.0036199	0.49	TRUE	7	21647735	0.0493393	2.87336e-06	22.0849
childhood absence epilepsy || id:ieu-b-13	ebi-a-GCST90017112	phylum Cyanobacteria id.1500	rs9864379	T	C	T	C	-0.138933	0.00176626	NA	0.106932	FALSE	FALSE	FALSE	0.00248599	0.48	TRUE	3	14306949	0.0268045	2.03334e-07	26.8655
childhood absence epilepsy || id:ieu-b-13	ebi-a-GCST90017113	phylum Euryarchaeota id.55	rs10202904	G	T	G	T	0.115986	-0.00339672	NA	0.577454	FALSE	FALSE	FALSE	0.00155454	0.0290001	TRUE	2	125440268	0.0230271	6.18885e-07	25.3707
childhood absence epilepsy || id:ieu-b-13	ebi-a-GCST90017113	phylum Euryarchaeota id.55	rs45498998	G	A	G	A	-0.131882	-0.00092918	NA	0.185458	FALSE	FALSE	FALSE	0.00198852	0.64	TRUE	21	27368994	0.029229	5.32451e-06	20.3584
childhood absence epilepsy || id:ieu-b-13	ebi-a-GCST90017113	phylum Euryarchaeota id.55	rs56131665	G	A	G	A	0.176759	-0.000128433	NA	0.0926134	FALSE	FALSE	FALSE	0.00270231	0.96	TRUE	5	178160975	0.0385787	5.30383e-06	20.9927
childhood absence epilepsy || id:ieu-b-13	ebi-a-GCST90017113	phylum Euryarchaeota id.55	rs6064552	T	C	T	C	-0.123612	-0.00165991	NA	0.2259	FALSE	FALSE	FALSE	0.00183747	0.37	TRUE	20	56042866	0.0275749	9.3377e-06	20.0952
childhood absence epilepsy || id:ieu-b-13	ebi-a-GCST90017113	phylum Euryarchaeota id.55	rs7015093	G	A	G	A	-0.118111	-0.00152193	NA	0.225659	FALSE	FALSE	FALSE	0.00184531	0.41	TRUE	8	58018853	0.0264389	7.19863e-06	19.9569
childhood absence epilepsy || id:ieu-b-13	ebi-a-GCST90017113	phylum Euryarchaeota id.55	rs76029318	T	C	T	C	0.214866	0.000483498	NA	0.0690955	FALSE	FALSE	FALSE	0.00303859	0.87	TRUE	13	41963791	0.0438442	1.04621e-06	24.0166
childhood absence epilepsy || id:ieu-b-13	ebi-a-GCST90017113	phylum Euryarchaeota id.55	rs77658038	A	C	A	C	-0.160157	0.00090289	NA	0.115479	FALSE	FALSE	FALSE	0.00242625	0.709999	TRUE	6	16284785	0.0340856	4.75423e-06	22.0775
childhood absence epilepsy || id:ieu-b-13	ebi-a-GCST90017113	phylum Euryarchaeota id.55	rs894996	C	A	C	A	0.203577	-0.00103535	NA	0.0771305	FALSE	FALSE	FALSE	0.00288544	0.719999	TRUE	4	104418307	0.0440033	5.11929e-06	21.4036
childhood absence epilepsy || id:ieu-b-13	ebi-a-GCST90017114	phylum Firmicutes id.1672	rs2547978	G	A	G	A	-0.0465802	0.000700699	NA	0.495764	FALSE	FALSE	FALSE	0.00153299	0.649999	TRUE	5	98020298	0.0105075	8.56841e-06	19.6519
childhood absence epilepsy || id:ieu-b-13	ebi-a-GCST90017114	phylum Firmicutes id.1672	rs3792064	G	A	G	A	0.0897349	-0.00381782	NA	0.0859139	FALSE	FALSE	FALSE	0.00273791	0.16	TRUE	2	231678413	0.0182532	6.75492e-07	24.1682
childhood absence epilepsy || id:ieu-b-13	ebi-a-GCST90017114	phylum Firmicutes id.1672	rs6814436	C	T	C	T	-0.0680205	-0.000788806	NA	0.859428	FALSE	FALSE	FALSE	0.00220546	0.719999	TRUE	4	161507301	0.0150844	6.80456e-06	20.334
childhood absence epilepsy || id:ieu-b-13	ebi-a-GCST90017114	phylum Firmicutes id.1672	rs6815608	C	T	C	T	-0.0935765	-0.000271314	NA	0.939014	FALSE	FALSE	FALSE	0.00320468	0.93	TRUE	4	152131744	0.0210869	7.23852e-06	19.6928
childhood absence epilepsy || id:ieu-b-13	ebi-a-GCST90017114	phylum Firmicutes id.1672	rs7247191	T	C	T	C	-0.0713033	-0.000829005	NA	0.122526	FALSE	FALSE	FALSE	0.00231954	0.719999	TRUE	19	22899585	0.0157424	4.73097e-06	20.5153
childhood absence epilepsy || id:ieu-b-13	ebi-a-GCST90017114	phylum Firmicutes id.1672	rs8085381	A	G	A	G	-0.0647291	-0.00233661	NA	0.855266	FALSE	FALSE	FALSE	0.00221111	0.29	TRUE	18	29328305	0.0146219	8.67261e-06	19.5971
childhood absence epilepsy || id:ieu-b-13	ebi-a-GCST90017114	phylum Firmicutes id.1672	rs992074	T	C	T	C	-0.233491	0.0063947	NA	0.952984	FALSE	FALSE	FALSE	0.00365874	0.0810009	TRUE	21	18567802	0.050901	8.51609e-06	21.042
childhood absence epilepsy || id:ieu-b-13	ebi-a-GCST90017115	phylum Lentisphaerae id.2238	rs11770843	C	T	C	T	0.111896	-1.52473e-05	NA	0.285616	FALSE	FALSE	FALSE	0.00170917	0.99	TRUE	7	146795379	0.0234776	1.13813e-06	22.7155
childhood absence epilepsy || id:ieu-b-13	ebi-a-GCST90017115	phylum Lentisphaerae id.2238	rs62570196	C	T	C	T	-0.217203	0.00147909	NA	0.0642473	FALSE	FALSE	FALSE	0.00317259	0.64	TRUE	9	111086170	0.0439621	9.64473e-07	24.4104
childhood absence epilepsy || id:ieu-b-13	ebi-a-GCST90017115	phylum Lentisphaerae id.2238	rs72640280	A	G	A	G	0.220185	-0.00229495	NA	0.0540293	FALSE	FALSE	FALSE	0.00342697	0.5	TRUE	1	11943792	0.0485947	5.19194e-06	20.5304
childhood absence epilepsy || id:ieu-b-13	ebi-a-GCST90017116	phylum Proteobacteria id.2375	rs10750258	C	A	C	A	0.0491248	-0.00194466	NA	0.613038	FALSE	FALSE	FALSE	0.00161186	0.23	TRUE	11	123997498	0.010824	8.71907e-06	20.598
childhood absence epilepsy || id:ieu-b-13	ebi-a-GCST90017116	phylum Proteobacteria id.2375	rs11126162	T	C	T	C	-0.0770689	0.00371313	NA	0.0748136	FALSE	FALSE	FALSE	0.00291555	0.2	TRUE	2	68086034	0.0187079	9.25977e-06	16.971
childhood absence epilepsy || id:ieu-b-13	ebi-a-GCST90017116	phylum Proteobacteria id.2375	rs11715072	G	A	G	A	-0.0519289	0.000836563	NA	0.286253	FALSE	FALSE	FALSE	0.00170408	0.62	TRUE	3	53720793	0.0115246	6.90415e-06	20.3033
childhood absence epilepsy || id:ieu-b-13	ebi-a-GCST90017116	phylum Proteobacteria id.2375	rs12467198	C	T	C	T	0.0498267	-0.000879716	NA	0.342984	FALSE	FALSE	FALSE	0.00161248	0.59	TRUE	2	124872681	0.011138	6.30667e-06	20.0129
childhood absence epilepsy || id:ieu-b-13	ebi-a-GCST90017116	phylum Proteobacteria id.2375	rs2347697	G	T	G	T	0.0502281	0.000844674	NA	0.344198	FALSE	FALSE	FALSE	0.00162611	0.6	TRUE	7	134388240	0.0108968	4.26914e-06	21.2469
childhood absence epilepsy || id:ieu-b-13	ebi-a-GCST90017116	phylum Proteobacteria id.2375	rs4340090	C	T	C	T	-0.0668162	-0.000612446	NA	0.136561	FALSE	FALSE	FALSE	0.00223272	0.780001	TRUE	12	130331764	0.0153387	9.9901e-06	18.9752
childhood absence epilepsy || id:ieu-b-13	ebi-a-GCST90017116	phylum Proteobacteria id.2375	rs6707783	C	T	C	T	0.0849594	-0.00338212	NA	0.0967191	FALSE	FALSE	FALSE	0.0026092	0.19	TRUE	2	52053891	0.0187782	8.08593e-06	20.4699
childhood absence epilepsy || id:ieu-b-13	ebi-a-GCST90017117	phylum Tenericutes id.3919	rs11890098	A	G	A	G	0.074438	0.000407708	NA	0.244783	FALSE	FALSE	FALSE	0.00178174	0.82	TRUE	2	157532549	0.0153389	9.56577e-07	23.5505
childhood absence epilepsy || id:ieu-b-13	ebi-a-GCST90017117	phylum Tenericutes id.3919	rs12566890	T	G	T	G	-0.101147	0.00343213	NA	0.0804591	FALSE	FALSE	FALSE	0.00283603	0.23	TRUE	1	61850864	0.0230978	3.65098e-06	19.1763
childhood absence epilepsy || id:ieu-b-13	ebi-a-GCST90017117	phylum Tenericutes id.3919	rs17214486	C	A	C	A	0.06099	-0.000632661	NA	0.385951	FALSE	FALSE	FALSE	0.00160157	0.69	TRUE	14	97159674	0.0135623	6.60861e-06	20.2232
childhood absence epilepsy || id:ieu-b-13	ebi-a-GCST90017117	phylum Tenericutes id.3919	rs2464826	A	C	A	C	0.0944239	0.00374172	NA	0.115649	FALSE	FALSE	FALSE	0.00242217	0.12	TRUE	7	79490250	0.0211806	8.39499e-06	19.8741
childhood absence epilepsy || id:ieu-b-13	ebi-a-GCST90017117	phylum Tenericutes id.3919	rs28537087	G	A	G	A	0.0820873	0.0041697	NA	0.142004	FALSE	FALSE	FALSE	0.00221223	0.0589997	TRUE	15	95309676	0.0188312	8.07402e-06	19.0019
childhood absence epilepsy || id:ieu-b-13	ebi-a-GCST90017117	phylum Tenericutes id.3919	rs3768491	G	A	G	A	0.0681052	-0.000637326	NA	0.720449	FALSE	FALSE	FALSE	0.00169905	0.709999	TRUE	1	109965986	0.0149061	4.2335e-06	20.8753
childhood absence epilepsy || id:ieu-b-13	ebi-a-GCST90017117	phylum Tenericutes id.3919	rs4885016	C	T	C	T	0.0819606	0.000610133	NA	0.848831	FALSE	FALSE	FALSE	0.00216376	0.780001	TRUE	13	73170489	0.0181628	7.26993e-06	20.3631
childhood absence epilepsy || id:ieu-b-13	ebi-a-GCST90017117	phylum Tenericutes id.3919	rs72901605	T	C	T	C	-0.0841852	0.00262429	NA	0.187278	FALSE	FALSE	FALSE	0.00199508	0.19	TRUE	11	47103877	0.0178119	3.25792e-06	22.3383
childhood absence epilepsy || id:ieu-b-13	ebi-a-GCST90017117	phylum Tenericutes id.3919	rs78169027	A	G	A	G	-0.108283	-0.000326314	NA	0.0954423	FALSE	FALSE	FALSE	0.00264214	0.9	TRUE	11	108439087	0.0237289	5.87611e-06	20.8241
childhood absence epilepsy || id:ieu-b-13	ebi-a-GCST90017118	phylum Verrucomicrobia id.3982	rs117107102	A	G	A	G	0.204283	0.00027616	NA	0.0324577	FALSE	FALSE	FALSE	0.00438483	0.95	TRUE	18	49473635	0.0427565	2.67935e-06	22.8276
childhood absence epilepsy || id:ieu-b-13	ebi-a-GCST90017118	phylum Verrucomicrobia id.3982	rs11729256	T	C	T	C	0.0696984	0.00133243	NA	0.24506	FALSE	FALSE	FALSE	0.00178557	0.46	TRUE	4	95027272	0.0146953	2.23404e-06	22.4951
childhood absence epilepsy || id:ieu-b-13	ebi-a-GCST90017118	phylum Verrucomicrobia id.3982	rs12512971	A	C	A	C	0.171057	0.00634442	NA	0.0441526	FALSE	FALSE	FALSE	0.00372174	0.0879995	TRUE	4	16548975	0.0398053	9.81386e-06	18.4672
childhood absence epilepsy || id:ieu-b-13	ebi-a-GCST90017118	phylum Verrucomicrobia id.3982	rs12908520	G	A	G	A	0.0594916	0.00237686	NA	0.442542	FALSE	FALSE	FALSE	0.0015538	0.13	TRUE	15	97570657	0.012823	3.40447e-06	21.5244
childhood absence epilepsy || id:ieu-b-13	ebi-a-GCST90017118	phylum Verrucomicrobia id.3982	rs61779207	G	A	G	A	-0.0755253	-0.000978528	NA	0.184396	FALSE	FALSE	FALSE	0.00199653	0.62	TRUE	1	41074472	0.0164385	5.27971e-06	21.1087
childhood absence epilepsy || id:ieu-b-13	ebi-a-GCST90017118	phylum Verrucomicrobia id.3982	rs74542928	T	C	T	C	0.115994	0.000439203	NA	0.0949238	FALSE	FALSE	FALSE	0.00262694	0.87	TRUE	4	100544188	0.0231324	4.08376e-07	25.1437
childhood absence epilepsy || id:ieu-b-13	ebi-a-GCST90017118	phylum Verrucomicrobia id.3982	rs9349825	A	G	A	G	-0.0660243	-0.00239208	NA	0.267495	FALSE	FALSE	FALSE	0.00175039	0.17	TRUE	6	56341481	0.0143911	6.2748e-06	21.0484
juvenile absence epilepsy || id:ieu-b-12	ebi-a-GCST90016908	class Actinobacteria id.419	rs11655079	T	C	T	C	-0.0560674	-0.00245243	NA	0.282222	FALSE	FALSE	FALSE	0.00131715	0.0629999	TRUE	17	75348675	0.0124286	5.92516e-06	20.3506
juvenile absence epilepsy || id:ieu-b-12	ebi-a-GCST90016908	class Actinobacteria id.419	rs11745923	G	T	G	T	0.0563759	0.000304495	NA	0.391955	FALSE	FALSE	FALSE	0.00118548	0.8	TRUE	5	475408	0.0115529	1.58132e-06	23.8125
juvenile absence epilepsy || id:ieu-b-12	ebi-a-GCST90016908	class Actinobacteria id.419	rs12049045	A	G	A	G	0.0510452	-0.00112638	NA	0.375998	FALSE	FALSE	FALSE	0.00119942	0.35	TRUE	1	114665485	0.0114325	8.62621e-06	19.9355
juvenile absence epilepsy || id:ieu-b-12	ebi-a-GCST90016908	class Actinobacteria id.419	rs134366	A	G	A	G	-0.111877	-0.00524493	NA	0.94343	FALSE	FALSE	FALSE	0.00249629	0.0359998	TRUE	22	35567355	0.023501	1.50428e-06	22.6626
juvenile absence epilepsy || id:ieu-b-12	ebi-a-GCST90016908	class Actinobacteria id.419	rs1376754	G	A	G	A	0.0509242	0.00137105	NA	0.442334	FALSE	FALSE	FALSE	0.00117747	0.24	TRUE	2	161611969	0.0112503	6.71382e-06	20.489
juvenile absence epilepsy || id:ieu-b-12	ebi-a-GCST90016908	class Actinobacteria id.419	rs4945008	G	A	G	A	-0.0540741	-0.00298481	NA	0.745905	FALSE	FALSE	FALSE	0.00131864	0.0239999	TRUE	11	71221248	0.0121393	5.39237e-06	19.8423
juvenile absence epilepsy || id:ieu-b-12	ebi-a-GCST90016908	class Actinobacteria id.419	rs857444	C	T	C	T	0.0509553	-0.00139202	NA	0.349784	FALSE	FALSE	FALSE	0.00119982	0.25	TRUE	6	14617591	0.011539	8.92237e-06	19.5003
juvenile absence epilepsy || id:ieu-b-12	ebi-a-GCST90016908	class Actinobacteria id.419	rs961091	G	A	G	A	0.0501255	0.000771805	NA	0.408028	FALSE	FALSE	FALSE	0.0011782	0.51	TRUE	7	95654718	0.011255	8.67601e-06	19.8347
juvenile absence epilepsy || id:ieu-b-12	ebi-a-GCST90016909	class Alphaproteobacteria id.2379	rs55876211	C	T	C	T	-0.080811	0.00112223	NA	0.186461	FALSE	FALSE	FALSE	0.00147696	0.450001	TRUE	3	84471266	0.0184159	7.53633e-06	19.2555
juvenile absence epilepsy || id:ieu-b-12	ebi-a-GCST90016909	class Alphaproteobacteria id.2379	rs76784716	A	G	A	G	0.133271	-0.00207983	NA	0.0718468	FALSE	FALSE	FALSE	0.00223705	0.35	TRUE	2	169033340	0.0267738	5.09143e-07	24.7771
juvenile absence epilepsy || id:ieu-b-12	ebi-a-GCST90016909	class Alphaproteobacteria id.2379	rs7960664	A	G	A	G	-0.0969489	-0.000498176	NA	0.861518	FALSE	FALSE	FALSE	0.00166557	0.760001	TRUE	12	89471235	0.0215149	8.84301e-06	20.3052
juvenile absence epilepsy || id:ieu-b-12	ebi-a-GCST90016909	class Alphaproteobacteria id.2379	rs9813022	A	G	A	G	-0.0751277	0.00237648	NA	0.312862	FALSE	FALSE	FALSE	0.00124719	0.0569994	TRUE	3	13726736	0.0153867	1.05334e-06	23.8402
juvenile absence epilepsy || id:ieu-b-12	ebi-a-GCST90016910	class Bacilli id.1673	rs11110282	A	G	A	G	-0.101189	0.000102549	NA	0.0616834	FALSE	FALSE	FALSE	0.00239412	0.97	TRUE	12	100585559	0.0217379	4.85445e-06	21.6686
juvenile absence epilepsy || id:ieu-b-12	ebi-a-GCST90016910	class Bacilli id.1673	rs11730038	G	A	G	A	-0.0630747	-0.00104694	NA	0.228695	FALSE	FALSE	FALSE	0.00137008	0.44	TRUE	4	98049499	0.0128717	1.96024e-06	24.0126
juvenile absence epilepsy || id:ieu-b-12	ebi-a-GCST90016910	class Bacilli id.1673	rs13068444	A	G	A	G	0.0601035	-0.00186348	NA	0.188344	FALSE	FALSE	FALSE	0.00148698	0.21	TRUE	3	64398863	0.0136407	9.53038e-06	19.4145
juvenile absence epilepsy || id:ieu-b-12	ebi-a-GCST90016910	class Bacilli id.1673	rs1595463	C	A	C	A	0.0476864	-0.00137682	NA	0.475017	FALSE	FALSE	FALSE	0.0011852	0.25	TRUE	2	231723657	0.0108547	7.97389e-06	19.2998
juvenile absence epilepsy || id:ieu-b-12	ebi-a-GCST90016910	class Bacilli id.1673	rs28564647	T	G	T	G	-0.0613034	9.04839e-05	NA	0.197709	FALSE	FALSE	FALSE	0.0014663	0.95	TRUE	9	101101172	0.0137579	7.81196e-06	19.8548
juvenile absence epilepsy || id:ieu-b-12	ebi-a-GCST90016910	class Bacilli id.1673	rs4028634	C	T	C	T	-0.0520614	0.00376391	NA	0.604353	FALSE	FALSE	FALSE	0.00118941	0.0016	TRUE	17	40835649	0.0109842	2.2076e-06	22.4644
juvenile absence epilepsy || id:ieu-b-12	ebi-a-GCST90016910	class Bacilli id.1673	rs57872228	C	T	C	T	-0.0714773	0.000409609	NA	0.150732	FALSE	FALSE	FALSE	0.00164049	0.8	TRUE	1	200418805	0.0146647	9.21977e-07	23.7569
juvenile absence epilepsy || id:ieu-b-12	ebi-a-GCST90016910	class Bacilli id.1673	rs7666190	A	C	A	C	0.104044	-0.000963629	NA	0.941145	FALSE	FALSE	FALSE	0.00242609	0.69	TRUE	4	151687420	0.0247934	8.46837e-06	17.6101
juvenile absence epilepsy || id:ieu-b-12	ebi-a-GCST90016911	class Bacteroidia id.912	rs111845179	T	C	T	C	0.102648	-0.0029998	NA	0.054235	FALSE	FALSE	FALSE	0.00255246	0.24	TRUE	14	59317502	0.0213843	9.23996e-07	23.0415
juvenile absence epilepsy || id:ieu-b-12	ebi-a-GCST90016911	class Bacteroidia id.912	rs17343978	A	C	A	C	-0.0552057	-0.000511401	NA	0.257399	FALSE	FALSE	FALSE	0.00132513	0.7	TRUE	22	27433885	0.0120278	8.3593e-06	21.0666
juvenile absence epilepsy || id:ieu-b-12	ebi-a-GCST90016911	class Bacteroidia id.912	rs2032750	C	T	C	T	0.0508393	0.000861954	NA	0.535433	FALSE	FALSE	FALSE	0.00116101	0.46	TRUE	2	53831026	0.0106807	1.91509e-06	22.6569
juvenile absence epilepsy || id:ieu-b-12	ebi-a-GCST90016911	class Bacteroidia id.912	rs55773148	G	A	G	A	-0.121514	-0.00105677	NA	0.0512565	FALSE	FALSE	FALSE	0.00261455	0.69	TRUE	13	70523029	0.0236759	3.89583e-07	26.3414
juvenile absence epilepsy || id:ieu-b-12	ebi-a-GCST90016911	class Bacteroidia id.912	rs62531359	T	G	T	G	0.0655728	-0.00147003	NA	0.13572	FALSE	FALSE	FALSE	0.00169288	0.39	TRUE	8	70916181	0.0149891	9.08657e-06	19.138
juvenile absence epilepsy || id:ieu-b-12	ebi-a-GCST90016911	class Bacteroidia id.912	rs7631304	G	A	G	A	-0.0645771	0.000387896	NA	0.185157	FALSE	FALSE	FALSE	0.00148388	0.79	TRUE	3	89339527	0.0132957	8.36778e-07	23.5904
juvenile absence epilepsy || id:ieu-b-12	ebi-a-GCST90016911	class Bacteroidia id.912	rs79585701	A	C	A	C	0.0646823	-0.000392965	NA	0.146564	FALSE	FALSE	FALSE	0.00162712	0.81	TRUE	8	13110185	0.0149628	9.98596e-06	18.6872
juvenile absence epilepsy || id:ieu-b-12	ebi-a-GCST90016911	class Bacteroidia id.912	rs929878	T	C	T	C	0.0548532	-0.000227736	NA	0.74254	FALSE	FALSE	FALSE	0.00131361	0.86	TRUE	16	74290641	0.012153	4.7338e-06	20.3722
juvenile absence epilepsy || id:ieu-b-12	ebi-a-GCST90016912	class Betaproteobacteria id.2867	rs11128180	A	G	A	G	0.0592944	-0.00080615	NA	0.230276	FALSE	FALSE	FALSE	0.00138064	0.56	TRUE	3	70592215	0.0128769	3.67147e-06	21.2034
juvenile absence epilepsy || id:ieu-b-12	ebi-a-GCST90016912	class Betaproteobacteria id.2867	rs1511453	A	G	A	G	0.0923492	0.00541549	NA	0.0628809	FALSE	FALSE	FALSE	0.00238766	0.0230001	TRUE	4	23588462	0.0199158	4.75762e-06	21.5016
juvenile absence epilepsy || id:ieu-b-12	ebi-a-GCST90016912	class Betaproteobacteria id.2867	rs1928341	G	A	G	A	-0.0525581	0.000542606	NA	0.587764	FALSE	FALSE	FALSE	0.00120074	0.649999	TRUE	1	153240013	0.0110408	2.0153e-06	22.661
juvenile absence epilepsy || id:ieu-b-12	ebi-a-GCST90016912	class Betaproteobacteria id.2867	rs2321387	G	A	G	A	-0.0494596	-0.00144531	NA	0.461953	FALSE	FALSE	FALSE	0.00116834	0.22	TRUE	13	58689340	0.0109424	5.80029e-06	20.4304
juvenile absence epilepsy || id:ieu-b-12	ebi-a-GCST90016912	class Betaproteobacteria id.2867	rs2613606	T	C	T	C	0.0513106	0.000405049	NA	0.56954	FALSE	FALSE	FALSE	0.00117142	0.73	TRUE	7	111285025	0.0109091	2.19816e-06	22.1226
juvenile absence epilepsy || id:ieu-b-12	ebi-a-GCST90016912	class Betaproteobacteria id.2867	rs320161	G	A	G	A	-0.0572286	0.0014694	NA	0.739616	FALSE	FALSE	FALSE	0.00133448	0.27	TRUE	9	104899117	0.01262	7.33247e-06	20.564
juvenile absence epilepsy || id:ieu-b-12	ebi-a-GCST90016912	class Betaproteobacteria id.2867	rs4033856	T	C	T	C	-0.0832423	0.000812382	NA	0.882727	FALSE	FALSE	FALSE	0.0018353	0.66	TRUE	4	45642485	0.0167237	5.17166e-07	24.7756
juvenile absence epilepsy || id:ieu-b-12	ebi-a-GCST90016912	class Betaproteobacteria id.2867	rs56386628	C	T	C	T	-0.0622252	0.00146518	NA	0.197747	FALSE	FALSE	FALSE	0.00144855	0.31	TRUE	8	112732674	0.0135688	5.86949e-06	21.0305
juvenile absence epilepsy || id:ieu-b-12	ebi-a-GCST90016912	class Betaproteobacteria id.2867	rs6087811	T	G	T	G	-0.0978177	-0.00226067	NA	0.0754632	FALSE	FALSE	FALSE	0.00220891	0.31	TRUE	20	30596130	0.0198522	7.44303e-07	24.2783
juvenile absence epilepsy || id:ieu-b-12	ebi-a-GCST90016912	class Betaproteobacteria id.2867	rs62395635	T	C	T	C	0.109741	-0.00108189	NA	0.0603645	FALSE	FALSE	FALSE	0.00245146	0.66	TRUE	5	173497796	0.0236	2.9409e-06	21.6229
juvenile absence epilepsy || id:ieu-b-12	ebi-a-GCST90016912	class Betaproteobacteria id.2867	rs9964679	A	G	A	G	0.052911	-0.00145596	NA	0.309249	FALSE	FALSE	FALSE	0.00126322	0.25	TRUE	18	26569901	0.0114866	4.84585e-06	21.2182
juvenile absence epilepsy || id:ieu-b-12	ebi-a-GCST90016913	class Clostridia id.1859	rs13179700	C	T	C	T	-0.0511937	-0.000955194	NA	0.653928	FALSE	FALSE	FALSE	0.00121011	0.43	TRUE	5	149077788	0.0109569	3.37085e-06	21.8302
juvenile absence epilepsy || id:ieu-b-12	ebi-a-GCST90016913	class Clostridia id.1859	rs1842454	G	A	G	A	-0.0547202	0.00181039	NA	0.22413	FALSE	FALSE	FALSE	0.00139139	0.19	TRUE	5	105060362	0.0127338	8.72027e-06	18.4663
juvenile absence epilepsy || id:ieu-b-12	ebi-a-GCST90016913	class Clostridia id.1859	rs6797343	T	G	T	G	-0.0592279	3.93244e-05	NA	0.824336	FALSE	FALSE	FALSE	0.00150439	0.98	TRUE	3	89268714	0.0134556	9.35643e-06	19.3752
juvenile absence epilepsy || id:ieu-b-12	ebi-a-GCST90016913	class Clostridia id.1859	rs6814436	C	T	C	T	-0.0739995	-0.0013523	NA	0.859378	FALSE	FALSE	FALSE	0.0016583	0.41	TRUE	4	161507301	0.0150815	9.65095e-07	24.0751
juvenile absence epilepsy || id:ieu-b-12	ebi-a-GCST90016913	class Clostridia id.1859	rs6815608	C	T	C	T	-0.103803	-0.000813413	NA	0.938952	FALSE	FALSE	FALSE	0.00240702	0.74	TRUE	4	152131744	0.0210883	4.01856e-07	24.2291
juvenile absence epilepsy || id:ieu-b-12	ebi-a-GCST90016913	class Clostridia id.1859	rs992074	T	C	T	C	-0.255639	0.00810775	NA	0.953092	FALSE	FALSE	FALSE	0.0027543	0.0032	TRUE	21	18567802	0.0508787	8.77506e-07	25.2454
juvenile absence epilepsy || id:ieu-b-12	ebi-a-GCST90016914	class Coriobacteriia id.809	rs11250875	T	C	T	C	0.06075	2.1728e-05	NA	0.207355	FALSE	FALSE	FALSE	0.00142152	0.99	TRUE	10	1922731	0.0130939	4.82848e-06	21.5256
juvenile absence epilepsy || id:ieu-b-12	ebi-a-GCST90016914	class Coriobacteriia id.809	rs1816223	G	A	G	A	0.0586265	-0.000281922	NA	0.789758	FALSE	FALSE	FALSE	0.00140618	0.84	TRUE	12	11494021	0.0129006	4.84117e-06	20.6523
juvenile absence epilepsy || id:ieu-b-12	ebi-a-GCST90016914	class Coriobacteriia id.809	rs2442778	A	G	A	G	0.116408	-0.000187171	NA	0.948561	FALSE	FALSE	FALSE	0.00261409	0.94	TRUE	3	11654412	0.0258545	9.02693e-06	20.2718
juvenile absence epilepsy || id:ieu-b-12	ebi-a-GCST90016914	class Coriobacteriia id.809	rs719099	A	G	A	G	0.0778402	-0.00154767	NA	0.11537	FALSE	FALSE	FALSE	0.00181138	0.39	TRUE	10	65799217	0.0155815	5.43313e-07	24.9568
juvenile absence epilepsy || id:ieu-b-12	ebi-a-GCST90016914	class Coriobacteriia id.809	rs8010111	A	G	A	G	0.103377	-0.000454801	NA	0.93261	FALSE	FALSE	FALSE	0.00231255	0.84	TRUE	14	39660509	0.0229286	6.8962e-06	20.3279
juvenile absence epilepsy || id:ieu-b-12	ebi-a-GCST90016915	class Deltaproteobacteria id.3087	rs1035691	G	A	G	A	0.055176	-0.000746565	NA	0.636323	FALSE	FALSE	FALSE	0.00120253	0.53	TRUE	11	10658735	0.0121602	9.65162e-06	20.5882
juvenile absence epilepsy || id:ieu-b-12	ebi-a-GCST90016915	class Deltaproteobacteria id.3087	rs112381107	C	T	C	T	0.206594	-0.000680664	NA	0.0497919	FALSE	FALSE	FALSE	0.00265024	0.8	TRUE	9	15269705	0.0456908	4.63052e-06	20.4446
juvenile absence epilepsy || id:ieu-b-12	ebi-a-GCST90016915	class Deltaproteobacteria id.3087	rs11599763	C	T	C	T	0.0544219	-0.00179517	NA	0.615209	FALSE	FALSE	FALSE	0.00120883	0.14	TRUE	10	11855599	0.0117397	3.94121e-06	21.4899
juvenile absence epilepsy || id:ieu-b-12	ebi-a-GCST90016915	class Deltaproteobacteria id.3087	rs17084793	G	A	G	A	-0.0710762	-0.00100555	NA	0.157979	FALSE	FALSE	FALSE	0.00161167	0.53	TRUE	18	69312914	0.015953	5.6863e-06	19.8501
juvenile absence epilepsy || id:ieu-b-12	ebi-a-GCST90016915	class Deltaproteobacteria id.3087	rs3935584	C	T	C	T	-0.0523484	-0.000927406	NA	0.498916	FALSE	FALSE	FALSE	0.00114958	0.42	TRUE	2	233929283	0.011566	7.50119e-06	20.4852
juvenile absence epilepsy || id:ieu-b-12	ebi-a-GCST90016915	class Deltaproteobacteria id.3087	rs55744759	A	G	A	G	-0.0779693	-0.00426152	NA	0.114257	FALSE	FALSE	FALSE	0.00181119	0.0189998	TRUE	8	57867671	0.0170738	7.31375e-06	20.8539
juvenile absence epilepsy || id:ieu-b-12	ebi-a-GCST90016915	class Deltaproteobacteria id.3087	rs6058181	C	T	C	T	0.0825716	0.00212463	NA	0.12466	FALSE	FALSE	FALSE	0.00174487	0.22	TRUE	20	33694801	0.0165958	3.39555e-07	24.7551
juvenile absence epilepsy || id:ieu-b-12	ebi-a-GCST90016915	class Deltaproteobacteria id.3087	rs62020470	A	G	A	G	-0.0585411	0.000151317	NA	0.271742	FALSE	FALSE	FALSE	0.00130232	0.91	TRUE	15	96161065	0.0129358	4.85087e-06	20.4802
juvenile absence epilepsy || id:ieu-b-12	ebi-a-GCST90016915	class Deltaproteobacteria id.3087	rs9928243	C	A	C	A	-0.0538457	0.0008273	NA	0.415481	FALSE	FALSE	FALSE	0.00117106	0.48	TRUE	16	71541641	0.0117718	5.02077e-06	20.9226
juvenile absence epilepsy || id:ieu-b-12	ebi-a-GCST90016916	class Erysipelotrichia id.2147	rs10781552	C	T	C	T	-0.0552212	0.000434923	NA	0.307462	FALSE	FALSE	FALSE	0.00126298	0.73	TRUE	10	133897233	0.0116074	2.33115e-06	22.633
juvenile absence epilepsy || id:ieu-b-12	ebi-a-GCST90016916	class Erysipelotrichia id.2147	rs1884466	C	T	C	T	-0.0475363	0.00132366	NA	0.396603	FALSE	FALSE	FALSE	0.00119003	0.27	TRUE	1	64139196	0.0106939	9.52708e-06	19.7596
juvenile absence epilepsy || id:ieu-b-12	ebi-a-GCST90016916	class Erysipelotrichia id.2147	rs2300774	A	G	A	G	-0.0524152	0.00114255	NA	0.610617	FALSE	FALSE	FALSE	0.00118707	0.34	TRUE	3	195793712	0.0106784	8.95468e-07	24.0936
juvenile absence epilepsy || id:ieu-b-12	ebi-a-GCST90016916	class Erysipelotrichia id.2147	rs35161940	T	C	T	C	-0.0806041	-0.000595757	NA	0.107011	FALSE	FALSE	FALSE	0.00188569	0.75	TRUE	17	70327224	0.0167641	1.8451e-06	23.1182
juvenile absence epilepsy || id:ieu-b-12	ebi-a-GCST90016916	class Erysipelotrichia id.2147	rs56970041	T	G	T	G	0.0724145	0.000522893	NA	0.099169	FALSE	FALSE	FALSE	0.00194238	0.79	TRUE	14	80357610	0.0164471	5.40344e-06	19.3853
juvenile absence epilepsy || id:ieu-b-12	ebi-a-GCST90016916	class Erysipelotrichia id.2147	rs7234058	T	C	T	C	-0.0945759	-0.00195435	NA	0.0910136	FALSE	FALSE	FALSE	0.00203957	0.34	TRUE	18	5830507	0.0194091	9.12347e-07	23.7438
juvenile absence epilepsy || id:ieu-b-12	ebi-a-GCST90016916	class Erysipelotrichia id.2147	rs8003149	C	T	C	T	0.0538798	0.000893769	NA	0.27641	FALSE	FALSE	FALSE	0.001289	0.49	TRUE	14	56156504	0.0116888	4.08479e-06	21.2477
juvenile absence epilepsy || id:ieu-b-12	ebi-a-GCST90016917	class Gammaproteobacteria id.3303	rs11181912	G	A	G	A	-0.0579153	-0.000288783	NA	0.325823	FALSE	FALSE	FALSE	0.0012414	0.82	TRUE	12	43572952	0.0118796	9.94764e-07	23.7675
juvenile absence epilepsy || id:ieu-b-12	ebi-a-GCST90016917	class Gammaproteobacteria id.3303	rs12404135	A	G	A	G	-0.0788843	0.000125748	NA	0.126566	FALSE	FALSE	FALSE	0.00172862	0.94	TRUE	1	186502694	0.0172415	8.89488e-06	20.933
juvenile absence epilepsy || id:ieu-b-12	ebi-a-GCST90016917	class Gammaproteobacteria id.3303	rs6706173	A	C	A	C	0.074251	0.00280295	NA	0.160288	FALSE	FALSE	FALSE	0.00157113	0.0739997	TRUE	2	167986992	0.0146392	1.99494e-07	25.7259
juvenile absence epilepsy || id:ieu-b-12	ebi-a-GCST90016917	class Gammaproteobacteria id.3303	rs75101789	C	T	C	T	0.0729012	-0.000802447	NA	0.1229	FALSE	FALSE	FALSE	0.00176985	0.649999	TRUE	3	18615903	0.0163003	8.7878e-06	20.0022
juvenile absence epilepsy || id:ieu-b-12	ebi-a-GCST90016918	class Lentisphaeria id.2250	rs11770843	C	T	C	T	0.109431	0.000609561	NA	0.285982	FALSE	FALSE	FALSE	0.00128367	0.630001	TRUE	7	146795379	0.0234879	1.9073e-06	21.7066
juvenile absence epilepsy || id:ieu-b-12	ebi-a-GCST90016918	class Lentisphaeria id.2250	rs62570196	C	T	C	T	-0.21635	0.00154709	NA	0.0642548	FALSE	FALSE	FALSE	0.00238713	0.52	TRUE	9	111086170	0.0439866	1.07924e-06	24.1921
juvenile absence epilepsy || id:ieu-b-12	ebi-a-GCST90016918	class Lentisphaeria id.2250	rs72640280	A	G	A	G	0.220207	-0.00603843	NA	0.0538741	FALSE	FALSE	FALSE	0.00258577	0.02	TRUE	1	11943792	0.0486196	5.18036e-06	20.5135
juvenile absence epilepsy || id:ieu-b-12	ebi-a-GCST90016919	class Melainabacteria id.1589	rs10738747	A	G	A	G	-0.0814624	0.00124875	NA	0.515411	FALSE	FALSE	FALSE	0.00116346	0.28	TRUE	9	26184578	0.0184409	9.95795e-06	19.5142
juvenile absence epilepsy || id:ieu-b-12	ebi-a-GCST90016919	class Melainabacteria id.1589	rs11150282	T	C	T	C	0.0989487	-0.000537603	NA	0.318161	FALSE	FALSE	FALSE	0.00124167	0.67	TRUE	16	80493705	0.0196972	6.02893e-07	25.2355
juvenile absence epilepsy || id:ieu-b-12	ebi-a-GCST90016919	class Melainabacteria id.1589	rs113884518	T	C	T	C	-0.205352	0.00190429	NA	0.0509939	FALSE	FALSE	FALSE	0.00263372	0.47	TRUE	9	24648997	0.0454982	8.05675e-06	20.3709
juvenile absence epilepsy || id:ieu-b-12	ebi-a-GCST90016919	class Melainabacteria id.1589	rs367480	A	G	A	G	0.083758	0.00211951	NA	0.577558	FALSE	FALSE	FALSE	0.00117066	0.0700003	TRUE	11	2937631	0.0185796	8.19917e-06	20.3226
juvenile absence epilepsy || id:ieu-b-12	ebi-a-GCST90016919	class Melainabacteria id.1589	rs4129395	G	A	G	A	0.0896187	-0.000551035	NA	0.441559	FALSE	FALSE	FALSE	0.00117617	0.64	TRUE	9	115975389	0.0185106	1.48057e-06	23.4399
juvenile absence epilepsy || id:ieu-b-12	ebi-a-GCST90016919	class Melainabacteria id.1589	rs789069	A	C	A	C	-0.103539	0.000341275	NA	0.175877	FALSE	FALSE	FALSE	0.00151946	0.82	TRUE	18	1008278	0.0234287	6.84636e-06	19.5304
juvenile absence epilepsy || id:ieu-b-12	ebi-a-GCST90016919	class Melainabacteria id.1589	rs9864379	T	C	T	C	-0.159735	-0.00173727	NA	0.106547	FALSE	FALSE	FALSE	0.00187247	0.35	TRUE	3	14306949	0.0292553	5.36056e-08	29.812
juvenile absence epilepsy || id:ieu-b-12	ebi-a-GCST90016920	class Methanobacteria id.119	rs10202904	G	T	G	T	0.121754	-0.000578249	NA	0.578364	FALSE	FALSE	FALSE	0.0011705	0.62	TRUE	2	125440268	0.0235357	3.01432e-07	26.7616
juvenile absence epilepsy || id:ieu-b-12	ebi-a-GCST90016920	class Methanobacteria id.119	rs56131665	G	A	G	A	0.178661	-0.00126971	NA	0.0924606	FALSE	FALSE	FALSE	0.00203343	0.53	TRUE	5	178160975	0.039298	6.17988e-06	20.669
juvenile absence epilepsy || id:ieu-b-12	ebi-a-GCST90016920	class Methanobacteria id.119	rs6776814	T	C	T	C	-0.199566	0.000722805	NA	0.0908387	FALSE	FALSE	FALSE	0.00201319	0.719999	TRUE	3	15053083	0.0411825	1.63061e-06	23.4827
juvenile absence epilepsy || id:ieu-b-12	ebi-a-GCST90016920	class Methanobacteria id.119	rs73068003	G	T	G	T	-0.15814	0.00347577	NA	0.123898	FALSE	FALSE	FALSE	0.00178317	0.051	TRUE	7	10773932	0.0351803	8.44578e-06	20.2062
juvenile absence epilepsy || id:ieu-b-12	ebi-a-GCST90016920	class Methanobacteria id.119	rs73457410	A	G	A	G	0.21534	-0.00200309	NA	0.0726517	FALSE	FALSE	FALSE	0.00224314	0.37	TRUE	13	41956181	0.0436695	1.40854e-06	24.316
juvenile absence epilepsy || id:ieu-b-12	ebi-a-GCST90016920	class Methanobacteria id.119	rs75208022	C	T	C	T	-0.227245	-0.000518475	NA	0.0713203	FALSE	FALSE	FALSE	0.00223881	0.82	TRUE	12	21338861	0.048763	5.92107e-06	21.7174
juvenile absence epilepsy || id:ieu-b-12	ebi-a-GCST90016920	class Methanobacteria id.119	rs894996	C	A	C	A	0.216999	-0.00222959	NA	0.0770668	FALSE	FALSE	FALSE	0.00216688	0.3	TRUE	4	104418307	0.0449076	1.87556e-06	23.3494
juvenile absence epilepsy || id:ieu-b-12	ebi-a-GCST90016921	class Mollicutes id.3920	rs11890098	A	G	A	G	0.074438	-5.81194e-05	NA	0.244797	FALSE	FALSE	FALSE	0.00134057	0.97	TRUE	2	157532549	0.0153389	9.56577e-07	23.5505
juvenile absence epilepsy || id:ieu-b-12	ebi-a-GCST90016921	class Mollicutes id.3920	rs12566890	T	G	T	G	-0.101147	0.00279692	NA	0.0803963	FALSE	FALSE	FALSE	0.00213464	0.19	TRUE	1	61850864	0.0230978	3.65098e-06	19.1763
juvenile absence epilepsy || id:ieu-b-12	ebi-a-GCST90016921	class Mollicutes id.3920	rs17214486	C	A	C	A	0.06099	-0.000381288	NA	0.385818	FALSE	FALSE	FALSE	0.00120496	0.75	TRUE	14	97159674	0.0135623	6.60861e-06	20.2232
juvenile absence epilepsy || id:ieu-b-12	ebi-a-GCST90016921	class Mollicutes id.3920	rs2464826	A	C	A	C	0.0944239	-0.0014173	NA	0.115141	FALSE	FALSE	FALSE	0.00182229	0.44	TRUE	7	79490250	0.0211806	8.39499e-06	19.8741
juvenile absence epilepsy || id:ieu-b-12	ebi-a-GCST90016921	class Mollicutes id.3920	rs28537087	G	A	G	A	0.0820873	0.00197109	NA	0.141778	FALSE	FALSE	FALSE	0.00166367	0.24	TRUE	15	95309676	0.0188312	8.07402e-06	19.0019
juvenile absence epilepsy || id:ieu-b-12	ebi-a-GCST90016921	class Mollicutes id.3920	rs3768491	G	A	G	A	0.0681052	0.0002248	NA	0.720572	FALSE	FALSE	FALSE	0.0012769	0.86	TRUE	1	109965986	0.0149061	4.2335e-06	20.8753
juvenile absence epilepsy || id:ieu-b-12	ebi-a-GCST90016921	class Mollicutes id.3920	rs4885016	C	T	C	T	0.0819606	-1.66429e-05	NA	0.848759	FALSE	FALSE	FALSE	0.00162713	0.99	TRUE	13	73170489	0.0181628	7.26993e-06	20.3631
juvenile absence epilepsy || id:ieu-b-12	ebi-a-GCST90016921	class Mollicutes id.3920	rs72901605	T	C	T	C	-0.0841852	-0.00237383	NA	0.18647	FALSE	FALSE	FALSE	0.00150266	0.11	TRUE	11	47103877	0.0178119	3.25792e-06	22.3383
juvenile absence epilepsy || id:ieu-b-12	ebi-a-GCST90016921	class Mollicutes id.3920	rs78169027	A	G	A	G	-0.108283	-0.00214319	NA	0.0952106	FALSE	FALSE	FALSE	0.00198609	0.28	TRUE	11	108439087	0.0237289	5.87611e-06	20.8241
juvenile absence epilepsy || id:ieu-b-12	ebi-a-GCST90016922	class Negativicutes id.2164	rs13086907	G	A	G	A	0.0625312	0.000259662	NA	0.211401	FALSE	FALSE	FALSE	0.00143245	0.86	TRUE	3	142135117	0.0131735	1.95488e-06	22.5316
juvenile absence epilepsy || id:ieu-b-12	ebi-a-GCST90016922	class Negativicutes id.2164	rs1643968	T	C	T	C	-0.0565284	-0.000666744	NA	0.304503	FALSE	FALSE	FALSE	0.00126388	0.6	TRUE	5	165266628	0.0112298	4.14601e-07	25.339
juvenile absence epilepsy || id:ieu-b-12	ebi-a-GCST90016922	class Negativicutes id.2164	rs4722181	T	G	T	G	0.0501306	-0.000645341	NA	0.489797	FALSE	FALSE	FALSE	0.0011551	0.58	TRUE	7	22817571	0.0105798	2.00111e-06	22.4518
juvenile absence epilepsy || id:ieu-b-12	ebi-a-GCST90016922	class Negativicutes id.2164	rs61249479	A	C	A	C	0.0777075	-0.00281677	NA	0.0990997	FALSE	FALSE	FALSE	0.00192651	0.14	TRUE	9	124912908	0.0168628	2.95474e-06	21.2357
juvenile absence epilepsy || id:ieu-b-12	ebi-a-GCST90016922	class Negativicutes id.2164	rs9423647	G	A	G	A	0.047817	-6.58277e-05	NA	0.505563	FALSE	FALSE	FALSE	0.00116359	0.95	TRUE	10	5579818	0.0105282	6.06108e-06	20.628
juvenile absence epilepsy || id:ieu-b-12	ebi-a-GCST90016923	class Verrucomicrobiae id.4029	rs117107102	A	G	A	G	0.204683	0.000379727	NA	0.0324654	FALSE	FALSE	FALSE	0.00329567	0.91	TRUE	18	49473635	0.0431572	2.91823e-06	22.4935
juvenile absence epilepsy || id:ieu-b-12	ebi-a-GCST90016923	class Verrucomicrobiae id.4029	rs11729256	T	C	T	C	0.0749798	-0.00187132	NA	0.244418	FALSE	FALSE	FALSE	0.00134517	0.16	TRUE	4	95027272	0.0150177	6.73085e-07	24.9277
juvenile absence epilepsy || id:ieu-b-12	ebi-a-GCST90016923	class Verrucomicrobiae id.4029	rs12908520	G	A	G	A	0.0618926	0.000241586	NA	0.441812	FALSE	FALSE	FALSE	0.00116782	0.84	TRUE	15	97570657	0.0130946	2.17165e-06	22.3405
juvenile absence epilepsy || id:ieu-b-12	ebi-a-GCST90016923	class Verrucomicrobiae id.4029	rs4936098	G	A	G	A	-0.0648843	-0.000975015	NA	0.635363	FALSE	FALSE	FALSE	0.00122412	0.43	TRUE	11	130280667	0.0135928	1.1222e-06	22.7856
juvenile absence epilepsy || id:ieu-b-12	ebi-a-GCST90016923	class Verrucomicrobiae id.4029	rs61779207	G	A	G	A	-0.0758309	0.00095271	NA	0.184765	FALSE	FALSE	FALSE	0.00150117	0.53	TRUE	1	41074472	0.0167762	6.7228e-06	20.4317
juvenile absence epilepsy || id:ieu-b-12	ebi-a-GCST90016923	class Verrucomicrobiae id.4029	rs74542928	T	C	T	C	0.112164	-0.00060169	NA	0.0948378	FALSE	FALSE	FALSE	0.00197685	0.760001	TRUE	4	100544188	0.0236422	1.63222e-06	22.5077
juvenile absence epilepsy || id:ieu-b-12	ebi-a-GCST90016923	class Verrucomicrobiae id.4029	rs9349825	A	G	A	G	-0.0704036	0.000890203	NA	0.268005	FALSE	FALSE	FALSE	0.00131518	0.5	TRUE	6	56341481	0.0147128	2.53688e-06	22.8981
juvenile absence epilepsy || id:ieu-b-12	ebi-a-GCST90016923	class Verrucomicrobiae id.4029	rs941682	G	A	G	A	-0.0631436	0.000444126	NA	0.279445	FALSE	FALSE	FALSE	0.00129542	0.73	TRUE	20	31867840	0.0143767	9.60993e-06	19.2904
juvenile absence epilepsy || id:ieu-b-12	ebi-a-GCST90016924	family Acidaminococcaceae id.2166	rs2933324	G	A	G	A	0.0662557	0.000177223	NA	0.722243	FALSE	FALSE	FALSE	0.00129077	0.89	TRUE	9	107117653	0.0140257	2.23676e-06	22.315
juvenile absence epilepsy || id:ieu-b-12	ebi-a-GCST90016924	family Acidaminococcaceae id.2166	rs6923842	T	C	T	C	-0.0796106	0.00144127	NA	0.182934	FALSE	FALSE	FALSE	0.00149568	0.34	TRUE	6	5723181	0.0169192	2.21304e-06	22.1402
juvenile absence epilepsy || id:ieu-b-12	ebi-a-GCST90016925	family Actinomycetaceae id.421	rs2889192	T	G	T	G	-0.0887537	-0.000313585	NA	0.781698	FALSE	FALSE	FALSE	0.00140478	0.82	TRUE	9	76394568	0.0195009	3.64418e-06	20.714
juvenile absence epilepsy || id:ieu-b-12	ebi-a-GCST90016925	family Actinomycetaceae id.421	rs34583783	G	T	G	T	0.123756	-0.000120386	NA	0.108536	FALSE	FALSE	FALSE	0.00185519	0.95	TRUE	6	67207371	0.026427	5.47974e-06	21.9299
juvenile absence epilepsy || id:ieu-b-12	ebi-a-GCST90016926	family Alcaligenaceae id.2875	rs112135816	T	G	T	G	-0.0775052	0.00123488	NA	0.113142	FALSE	FALSE	FALSE	0.00184637	0.5	TRUE	9	82485327	0.0171554	5.27667e-06	20.4108
juvenile absence epilepsy || id:ieu-b-12	ebi-a-GCST90016926	family Alcaligenaceae id.2875	rs1153990	A	G	A	G	-0.058727	0.00122004	NA	0.236188	FALSE	FALSE	FALSE	0.00135739	0.37	TRUE	5	104233461	0.0128306	5.96788e-06	20.9499
juvenile absence epilepsy || id:ieu-b-12	ebi-a-GCST90016926	family Alcaligenaceae id.2875	rs4033856	T	C	T	C	-0.081834	0.000812382	NA	0.882727	FALSE	FALSE	FALSE	0.0018353	0.66	TRUE	4	45642485	0.0168931	1.02903e-06	23.4665
juvenile absence epilepsy || id:ieu-b-12	ebi-a-GCST90016926	family Alcaligenaceae id.2875	rs62395635	T	C	T	C	0.110583	-0.00108189	NA	0.0603645	FALSE	FALSE	FALSE	0.00245146	0.66	TRUE	5	173497796	0.0238514	3.34696e-06	21.4956
juvenile absence epilepsy || id:ieu-b-12	ebi-a-GCST90016926	family Alcaligenaceae id.2875	rs6969323	A	C	A	C	-0.0593564	0.000866077	NA	0.232689	FALSE	FALSE	FALSE	0.00138043	0.53	TRUE	7	104214487	0.0129137	3.8858e-06	21.1268
juvenile absence epilepsy || id:ieu-b-12	ebi-a-GCST90016926	family Alcaligenaceae id.2875	rs7638039	T	C	T	C	0.0603335	-0.00032783	NA	0.239884	FALSE	FALSE	FALSE	0.00136774	0.81	TRUE	3	70588939	0.0127779	2.70477e-06	22.2945
juvenile absence epilepsy || id:ieu-b-12	ebi-a-GCST90016926	family Alcaligenaceae id.2875	rs9964679	A	G	A	G	0.0537051	-0.00145596	NA	0.309249	FALSE	FALSE	FALSE	0.00126322	0.25	TRUE	18	26569901	0.0116008	4.47384e-06	21.4316
juvenile absence epilepsy || id:ieu-b-12	ebi-a-GCST90016927	family Bacteroidaceae id.917	rs11585893	A	G	A	G	-0.0740746	-0.000919509	NA	0.141946	FALSE	FALSE	FALSE	0.00168686	0.59	TRUE	1	10644351	0.0147633	1.79511e-06	25.1751
juvenile absence epilepsy || id:ieu-b-12	ebi-a-GCST90016927	family Bacteroidaceae id.917	rs1340391	T	C	T	C	-0.0592004	-0.00103704	NA	0.194617	FALSE	FALSE	FALSE	0.00145488	0.48	TRUE	1	102960989	0.0132244	6.73008e-06	20.04
juvenile absence epilepsy || id:ieu-b-12	ebi-a-GCST90016927	family Bacteroidaceae id.917	rs17619981	T	G	T	G	0.0880978	0.00184364	NA	0.0950138	FALSE	FALSE	FALSE	0.0019777	0.35	TRUE	19	24342250	0.0187002	2.68683e-06	22.1941
juvenile absence epilepsy || id:ieu-b-12	ebi-a-GCST90016927	family Bacteroidaceae id.917	rs6795673	C	T	C	T	0.0538565	-0.000483635	NA	0.438633	FALSE	FALSE	FALSE	0.00115967	0.68	TRUE	3	10593224	0.0105251	3.37909e-07	26.1833
juvenile absence epilepsy || id:ieu-b-12	ebi-a-GCST90016927	family Bacteroidaceae id.917	rs9507307	C	T	C	T	0.0604456	0.00100972	NA	0.191262	FALSE	FALSE	FALSE	0.00148837	0.5	TRUE	13	24910476	0.0129128	2.12711e-06	21.9123
juvenile absence epilepsy || id:ieu-b-12	ebi-a-GCST90016928	family Bacteroidales S24 7group id.11173	rs17043785	T	C	T	C	-0.176187	-0.00452095	NA	0.0555759	FALSE	FALSE	FALSE	0.00249989	0.0710003	TRUE	2	53139362	0.0347133	5.11835e-07	25.7606
juvenile absence epilepsy || id:ieu-b-12	ebi-a-GCST90016928	family Bacteroidales S24 7group id.11173	rs61508842	T	C	T	C	0.122574	-0.000192029	NA	0.104089	FALSE	FALSE	FALSE	0.00190735	0.92	TRUE	3	158653545	0.0272389	7.82781e-06	20.2497
juvenile absence epilepsy || id:ieu-b-12	ebi-a-GCST90016928	family Bacteroidales S24 7group id.11173	rs78609301	A	G	A	G	-0.0867065	-0.00061441	NA	0.205675	FALSE	FALSE	FALSE	0.00141935	0.67	TRUE	6	63236747	0.0195709	7.093e-06	19.6283
juvenile absence epilepsy || id:ieu-b-12	ebi-a-GCST90016929	family Bifidobacteriaceae id.433	rs10831953	G	A	G	A	0.0537537	0.00227981	NA	0.347189	FALSE	FALSE	FALSE	0.00121771	0.061	TRUE	11	13098051	0.0123746	9.94741e-06	18.8692
juvenile absence epilepsy || id:ieu-b-12	ebi-a-GCST90016929	family Bifidobacteriaceae id.433	rs55888705	A	G	A	G	0.053673	0.0015185	NA	0.364041	FALSE	FALSE	FALSE	0.00120952	0.21	TRUE	4	1517826	0.0120586	8.66204e-06	19.8115
juvenile absence epilepsy || id:ieu-b-12	ebi-a-GCST90016929	family Bifidobacteriaceae id.433	rs6899771	A	G	A	G	-0.0914312	0.00285758	NA	0.0888549	FALSE	FALSE	FALSE	0.00202019	0.16	TRUE	6	97406220	0.0202604	7.27998e-06	20.3654
juvenile absence epilepsy || id:ieu-b-12	ebi-a-GCST90016929	family Bifidobacteriaceae id.433	rs7174549	T	C	T	C	-0.0551726	-8.17915e-05	NA	0.659927	FALSE	FALSE	FALSE	0.00122619	0.95	TRUE	15	92463303	0.0124655	6.86784e-06	19.5897
juvenile absence epilepsy || id:ieu-b-12	ebi-a-GCST90016929	family Bifidobacteriaceae id.433	rs857444	C	T	C	T	0.0553965	-0.00139202	NA	0.349784	FALSE	FALSE	FALSE	0.00119982	0.25	TRUE	6	14617591	0.0120669	3.8249e-06	21.0753
juvenile absence epilepsy || id:ieu-b-12	ebi-a-GCST90016931	family Clostridiaceae1 id.1869	rs10875374	T	C	T	C	0.0536759	-0.00117245	NA	0.559259	FALSE	FALSE	FALSE	0.00116484	0.31	TRUE	1	101804809	0.0119436	8.09823e-06	20.1971
juvenile absence epilepsy || id:ieu-b-12	ebi-a-GCST90016931	family Clostridiaceae1 id.1869	rs12186080	G	A	G	A	0.0748236	0.000786422	NA	0.160475	FALSE	FALSE	FALSE	0.00157573	0.62	TRUE	3	132596627	0.016246	5.33962e-06	21.2121
juvenile absence epilepsy || id:ieu-b-12	ebi-a-GCST90016931	family Clostridiaceae1 id.1869	rs12341505	G	A	G	A	0.0814503	-0.00143863	NA	0.125383	FALSE	FALSE	FALSE	0.00175282	0.41	TRUE	9	136710881	0.0179338	4.54485e-06	20.6272
juvenile absence epilepsy || id:ieu-b-12	ebi-a-GCST90016931	family Clostridiaceae1 id.1869	rs62397761	A	G	A	G	0.0615805	0.00163652	NA	0.271526	FALSE	FALSE	FALSE	0.00130873	0.21	TRUE	6	48093014	0.0136198	9.07716e-06	20.443
juvenile absence epilepsy || id:ieu-b-12	ebi-a-GCST90016931	family Clostridiaceae1 id.1869	rs881532	G	A	G	A	0.0533035	-3.59491e-06	NA	0.514059	FALSE	FALSE	FALSE	0.00117222	1	TRUE	22	47806774	0.0119011	7.8966e-06	20.0603
juvenile absence epilepsy || id:ieu-b-12	ebi-a-GCST90016932	family Clostridiales vadin BB60 group id.11286	rs10517600	G	T	G	T	-0.0626993	0.000134683	NA	0.469137	FALSE	FALSE	FALSE	0.00115358	0.91	TRUE	4	155632958	0.0139364	6.82763e-06	20.2406
juvenile absence epilepsy || id:ieu-b-12	ebi-a-GCST90016932	family Clostridiales vadin BB60 group id.11286	rs10904722	C	T	C	T	-0.0672314	-0.000639271	NA	0.310166	FALSE	FALSE	FALSE	0.00125394	0.61	TRUE	10	6714424	0.0147123	5.04836e-06	20.8825
juvenile absence epilepsy || id:ieu-b-12	ebi-a-GCST90016932	family Clostridiales vadin BB60 group id.11286	rs13409132	A	G	A	G	-0.165419	-0.00413846	NA	0.0534164	FALSE	FALSE	FALSE	0.0025777	0.11	TRUE	2	205616346	0.0352154	4.3723e-06	22.0651
juvenile absence epilepsy || id:ieu-b-12	ebi-a-GCST90016932	family Clostridiales vadin BB60 group id.11286	rs17121075	G	A	G	A	0.0769254	-0.00137652	NA	0.191322	FALSE	FALSE	FALSE	0.00148521	0.35	TRUE	14	85856796	0.0172234	7.91425e-06	19.9481
juvenile absence epilepsy || id:ieu-b-12	ebi-a-GCST90016932	family Clostridiales vadin BB60 group id.11286	rs2191834	T	G	T	G	-0.0746375	5.01273e-05	NA	0.747014	FALSE	FALSE	FALSE	0.00132848	0.97	TRUE	2	229942951	0.0159136	2.50196e-06	21.9977
juvenile absence epilepsy || id:ieu-b-12	ebi-a-GCST90016932	family Clostridiales vadin BB60 group id.11286	rs28691777	C	T	C	T	0.137134	0.00141036	NA	0.0697864	FALSE	FALSE	FALSE	0.00226366	0.53	TRUE	17	58149405	0.0266996	6.95697e-07	26.3804
juvenile absence epilepsy || id:ieu-b-12	ebi-a-GCST90016932	family Clostridiales vadin BB60 group id.11286	rs55682560	C	T	C	T	-0.131519	-0.00250408	NA	0.0752435	FALSE	FALSE	FALSE	0.00219229	0.25	TRUE	15	87392290	0.0261319	4.97038e-07	25.33
juvenile absence epilepsy || id:ieu-b-12	ebi-a-GCST90016932	family Clostridiales vadin BB60 group id.11286	rs6588624	A	G	A	G	0.0662317	0.000625744	NA	0.50528	FALSE	FALSE	FALSE	0.00115182	0.59	TRUE	1	56849539	0.0138147	1.79287e-06	22.9852
juvenile absence epilepsy || id:ieu-b-12	ebi-a-GCST90016932	family Clostridiales vadin BB60 group id.11286	rs66714985	A	C	A	C	0.116908	-0.0018055	NA	0.0725657	FALSE	FALSE	FALSE	0.0022424	0.42	TRUE	8	3305122	0.0252447	4.85333e-06	21.4461
juvenile absence epilepsy || id:ieu-b-12	ebi-a-GCST90016932	family Clostridiales vadin BB60 group id.11286	rs7226487	A	G	A	G	-0.0643682	8.21229e-05	NA	0.450818	FALSE	FALSE	FALSE	0.00116464	0.94	TRUE	18	74373125	0.0138701	3.58286e-06	21.5369
juvenile absence epilepsy || id:ieu-b-12	ebi-a-GCST90016932	family Clostridiales vadin BB60 group id.11286	rs7725895	A	G	A	G	-0.116224	0.00122049	NA	0.071018	FALSE	FALSE	FALSE	0.00225265	0.59	TRUE	5	142244898	0.0240367	3.94357e-06	23.3799
juvenile absence epilepsy || id:ieu-b-12	ebi-a-GCST90016932	family Clostridiales vadin BB60 group id.11286	rs989682	A	G	A	G	0.070194	-5.61224e-05	NA	0.290169	FALSE	FALSE	FALSE	0.00127871	0.96	TRUE	3	15564453	0.0155364	6.84715e-06	20.4126
juvenile absence epilepsy || id:ieu-b-12	ebi-a-GCST90016933	family Coriobacteriaceae id.811	rs11250875	T	C	T	C	0.06075	2.1728e-05	NA	0.207355	FALSE	FALSE	FALSE	0.00142152	0.99	TRUE	10	1922731	0.0130939	4.82848e-06	21.5256
juvenile absence epilepsy || id:ieu-b-12	ebi-a-GCST90016933	family Coriobacteriaceae id.811	rs1816223	G	A	G	A	0.0586265	-0.000281922	NA	0.789758	FALSE	FALSE	FALSE	0.00140618	0.84	TRUE	12	11494021	0.0129006	4.84117e-06	20.6523
juvenile absence epilepsy || id:ieu-b-12	ebi-a-GCST90016933	family Coriobacteriaceae id.811	rs2442778	A	G	A	G	0.116408	-0.000187171	NA	0.948561	FALSE	FALSE	FALSE	0.00261409	0.94	TRUE	3	11654412	0.0258545	9.02693e-06	20.2718
juvenile absence epilepsy || id:ieu-b-12	ebi-a-GCST90016933	family Coriobacteriaceae id.811	rs719099	A	G	A	G	0.0778402	-0.00154767	NA	0.11537	FALSE	FALSE	FALSE	0.00181138	0.39	TRUE	10	65799217	0.0155815	5.43313e-07	24.9568
juvenile absence epilepsy || id:ieu-b-12	ebi-a-GCST90016933	family Coriobacteriaceae id.811	rs8010111	A	G	A	G	0.103377	-0.000454801	NA	0.93261	FALSE	FALSE	FALSE	0.00231255	0.84	TRUE	14	39660509	0.0229286	6.8962e-06	20.3279
juvenile absence epilepsy || id:ieu-b-12	ebi-a-GCST90016934	family Defluviitaleaceae id.1924	rs17051335	C	T	C	T	-0.134314	0.000340342	NA	0.0734699	FALSE	FALSE	FALSE	0.00221862	0.88	TRUE	4	122202910	0.0292201	4.58121e-06	21.129
juvenile absence epilepsy || id:ieu-b-12	ebi-a-GCST90016934	family Defluviitaleaceae id.1924	rs4344384	T	G	T	G	-0.0708803	-0.00211091	NA	0.511285	FALSE	FALSE	FALSE	0.00117074	0.0710003	TRUE	10	66407366	0.0156121	5.86017e-06	20.6124
juvenile absence epilepsy || id:ieu-b-12	ebi-a-GCST90016934	family Defluviitaleaceae id.1924	rs9725395	A	G	A	G	-0.138357	-0.000945436	NA	0.077398	FALSE	FALSE	FALSE	0.00216265	0.66	TRUE	1	85205632	0.0295185	3.41374e-06	21.9692
juvenile absence epilepsy || id:ieu-b-12	ebi-a-GCST90016935	family Desulfovibrionaceae id.3169	rs112381107	C	T	C	T	0.211435	-0.000680664	NA	0.0497919	FALSE	FALSE	FALSE	0.00265024	0.8	TRUE	9	15269705	0.0456962	2.81877e-06	21.4089
juvenile absence epilepsy || id:ieu-b-12	ebi-a-GCST90016935	family Desulfovibrionaceae id.3169	rs11599763	C	T	C	T	0.0555931	-0.00179517	NA	0.615209	FALSE	FALSE	FALSE	0.00120883	0.14	TRUE	10	11855599	0.0117493	2.49701e-06	22.3881
juvenile absence epilepsy || id:ieu-b-12	ebi-a-GCST90016935	family Desulfovibrionaceae id.3169	rs3935584	C	T	C	T	-0.0525838	-0.000927406	NA	0.498916	FALSE	FALSE	FALSE	0.00114958	0.42	TRUE	2	233929283	0.0115757	6.78141e-06	20.6352
juvenile absence epilepsy || id:ieu-b-12	ebi-a-GCST90016935	family Desulfovibrionaceae id.3169	rs6058181	C	T	C	T	0.0834742	0.00212463	NA	0.12466	FALSE	FALSE	FALSE	0.00174487	0.22	TRUE	20	33694801	0.0166111	2.69911e-07	25.2527
juvenile absence epilepsy || id:ieu-b-12	ebi-a-GCST90016935	family Desulfovibrionaceae id.3169	rs72647048	T	C	T	C	-0.0770089	-0.00427663	NA	0.114347	FALSE	FALSE	FALSE	0.00180939	0.0179999	TRUE	8	57865378	0.017089	9.60882e-06	20.3071
juvenile absence epilepsy || id:ieu-b-12	ebi-a-GCST90016935	family Desulfovibrionaceae id.3169	rs9928243	C	A	C	A	-0.0541732	0.0008273	NA	0.415481	FALSE	FALSE	FALSE	0.00117106	0.48	TRUE	16	71541641	0.0117819	4.48477e-06	21.1416
juvenile absence epilepsy || id:ieu-b-12	ebi-a-GCST90016936	family Enterobacteriaceae id.3469	rs2374342	C	A	C	A	0.0582927	-0.00117586	NA	0.359285	FALSE	FALSE	FALSE	0.00119962	0.33	TRUE	2	42133542	0.0126195	4.51617e-06	21.3375
juvenile absence epilepsy || id:ieu-b-12	ebi-a-GCST90016936	family Enterobacteriaceae id.3469	rs504442	T	G	T	G	0.084159	-0.00191522	NA	0.116619	FALSE	FALSE	FALSE	0.00180785	0.29	TRUE	18	55145547	0.0189479	5.17095e-06	19.7278
juvenile absence epilepsy || id:ieu-b-12	ebi-a-GCST90016937	family Erysipelotrichaceae id.2149	rs10781552	C	T	C	T	-0.0552212	0.000434923	NA	0.307462	FALSE	FALSE	FALSE	0.00126298	0.73	TRUE	10	133897233	0.0116074	2.33115e-06	22.633
juvenile absence epilepsy || id:ieu-b-12	ebi-a-GCST90016937	family Erysipelotrichaceae id.2149	rs1884466	C	T	C	T	-0.0475363	0.00132366	NA	0.396603	FALSE	FALSE	FALSE	0.00119003	0.27	TRUE	1	64139196	0.0106939	9.52708e-06	19.7596
juvenile absence epilepsy || id:ieu-b-12	ebi-a-GCST90016937	family Erysipelotrichaceae id.2149	rs2300774	A	G	A	G	-0.0524152	0.00114255	NA	0.610617	FALSE	FALSE	FALSE	0.00118707	0.34	TRUE	3	195793712	0.0106784	8.95468e-07	24.0936
juvenile absence epilepsy || id:ieu-b-12	ebi-a-GCST90016937	family Erysipelotrichaceae id.2149	rs35161940	T	C	T	C	-0.0806041	-0.000595757	NA	0.107011	FALSE	FALSE	FALSE	0.00188569	0.75	TRUE	17	70327224	0.0167641	1.8451e-06	23.1182
juvenile absence epilepsy || id:ieu-b-12	ebi-a-GCST90016937	family Erysipelotrichaceae id.2149	rs56970041	T	G	T	G	0.0724145	0.000522893	NA	0.099169	FALSE	FALSE	FALSE	0.00194238	0.79	TRUE	14	80357610	0.0164471	5.40344e-06	19.3853
juvenile absence epilepsy || id:ieu-b-12	ebi-a-GCST90016937	family Erysipelotrichaceae id.2149	rs7234058	T	C	T	C	-0.0945759	-0.00195435	NA	0.0910136	FALSE	FALSE	FALSE	0.00203957	0.34	TRUE	18	5830507	0.0194091	9.12347e-07	23.7438
juvenile absence epilepsy || id:ieu-b-12	ebi-a-GCST90016937	family Erysipelotrichaceae id.2149	rs8003149	C	T	C	T	0.0538798	0.000893769	NA	0.27641	FALSE	FALSE	FALSE	0.001289	0.49	TRUE	14	56156504	0.0116888	4.08479e-06	21.2477
juvenile absence epilepsy || id:ieu-b-12	ebi-a-GCST90016938	family Family XI id.1936	rs10759623	C	T	C	T	-0.162115	-0.00199732	NA	0.183514	FALSE	FALSE	FALSE	0.00149514	0.18	TRUE	9	115821485	0.032151	5.78309e-07	25.4248
juvenile absence epilepsy || id:ieu-b-12	ebi-a-GCST90016938	family Family XI id.1936	rs11547158	A	G	A	G	-0.177599	-0.0016575	NA	0.129309	FALSE	FALSE	FALSE	0.00173531	0.34	TRUE	7	148921732	0.0372795	2.70222e-06	22.6956
juvenile absence epilepsy || id:ieu-b-12	ebi-a-GCST90016938	family Family XI id.1936	rs17379710	T	C	T	C	-0.116383	0.000880396	NA	0.44194	FALSE	FALSE	FALSE	0.00117015	0.450001	TRUE	11	35334668	0.0252125	3.97109e-06	21.3082
juvenile absence epilepsy || id:ieu-b-12	ebi-a-GCST90016938	family Family XI id.1936	rs2155352	A	G	A	G	-0.150538	0.00253606	NA	0.218606	FALSE	FALSE	FALSE	0.00140723	0.0719996	TRUE	11	95357209	0.0302319	6.63437e-07	24.7948
juvenile absence epilepsy || id:ieu-b-12	ebi-a-GCST90016938	family Family XI id.1936	rs2156611	T	C	T	C	-0.112486	-0.00208629	NA	0.484179	FALSE	FALSE	FALSE	0.00116361	0.0729995	TRUE	18	43345864	0.0251099	9.42671e-06	20.0681
juvenile absence epilepsy || id:ieu-b-12	ebi-a-GCST90016938	family Family XI id.1936	rs3733511	A	G	A	G	0.128253	0.000613795	NA	0.296695	FALSE	FALSE	FALSE	0.0012629	0.630001	TRUE	4	119955787	0.0274718	3.38556e-06	21.7952
juvenile absence epilepsy || id:ieu-b-12	ebi-a-GCST90016939	family Family XIII id.1957	rs482905	G	T	G	T	0.0596528	-0.00119651	NA	0.250888	FALSE	FALSE	FALSE	0.00133017	0.37	TRUE	1	166557202	0.012717	3.72349e-06	22.0035
juvenile absence epilepsy || id:ieu-b-12	ebi-a-GCST90016939	family Family XIII id.1957	rs6797051	C	T	C	T	-0.0805985	0.00262335	NA	0.121192	FALSE	FALSE	FALSE	0.00177994	0.14	TRUE	3	88995218	0.0171364	4.89283e-06	22.1215
juvenile absence epilepsy || id:ieu-b-12	ebi-a-GCST90016939	family Family XIII id.1957	rs7514702	T	C	T	C	-0.0663236	-0.00227096	NA	0.181195	FALSE	FALSE	FALSE	0.00150667	0.13	TRUE	1	186914023	0.0141626	3.91643e-06	21.9306
juvenile absence epilepsy || id:ieu-b-12	ebi-a-GCST90016940	family Lachnospiraceae id.1987	rs11139361	C	T	C	T	-0.0494463	-0.00169874	NA	0.642016	FALSE	FALSE	FALSE	0.00120523	0.16	TRUE	9	72179847	0.0110503	4.26265e-06	20.0226
juvenile absence epilepsy || id:ieu-b-12	ebi-a-GCST90016940	family Lachnospiraceae id.1987	rs11841382	G	T	G	T	-0.0718128	-0.00185533	NA	0.0792128	FALSE	FALSE	FALSE	0.00214335	0.39	TRUE	13	38004672	0.017462	9.57767e-06	16.9128
juvenile absence epilepsy || id:ieu-b-12	ebi-a-GCST90016940	family Lachnospiraceae id.1987	rs12760724	A	C	A	C	-0.0484566	0.00160437	NA	0.364539	FALSE	FALSE	FALSE	0.00119274	0.18	TRUE	1	214031969	0.0107934	7.26742e-06	20.1553
juvenile absence epilepsy || id:ieu-b-12	ebi-a-GCST90016940	family Lachnospiraceae id.1987	rs2159863	A	G	A	G	-0.0585831	-0.000562833	NA	0.208125	FALSE	FALSE	FALSE	0.00144178	0.7	TRUE	4	10245354	0.0128742	3.69556e-06	20.7064
juvenile absence epilepsy || id:ieu-b-12	ebi-a-GCST90016940	family Lachnospiraceae id.1987	rs2910921	C	T	C	T	-0.160302	-0.00139184	NA	0.955949	FALSE	FALSE	FALSE	0.00281756	0.62	TRUE	5	32348593	0.035832	8.41977e-06	20.0141
juvenile absence epilepsy || id:ieu-b-12	ebi-a-GCST90016940	family Lachnospiraceae id.1987	rs7359994	C	T	C	T	0.0503142	0.00205152	NA	0.647635	FALSE	FALSE	FALSE	0.00119952	0.0870001	TRUE	19	29408858	0.0112482	5.35895e-06	20.0085
juvenile absence epilepsy || id:ieu-b-12	ebi-a-GCST90016941	family Lactobacillaceae id.1836	rs768253	T	G	T	G	-0.0792344	-0.000655554	NA	0.39375	FALSE	FALSE	FALSE	0.0011863	0.58	TRUE	8	69010103	0.0170604	3.60761e-06	21.5699
juvenile absence epilepsy || id:ieu-b-12	ebi-a-GCST90016941	family Lactobacillaceae id.1836	rs921925	A	C	A	C	0.0999419	-0.00121356	NA	0.216906	FALSE	FALSE	FALSE	0.00141891	0.39	TRUE	19	6928017	0.0201687	5.77192e-07	24.555
juvenile absence epilepsy || id:ieu-b-12	ebi-a-GCST90016942	family Methanobacteriaceae id.121	rs10202904	G	T	G	T	0.121754	-0.000578249	NA	0.578364	FALSE	FALSE	FALSE	0.0011705	0.62	TRUE	2	125440268	0.0235357	3.01432e-07	26.7616
juvenile absence epilepsy || id:ieu-b-12	ebi-a-GCST90016942	family Methanobacteriaceae id.121	rs56131665	G	A	G	A	0.178661	-0.00126971	NA	0.0924606	FALSE	FALSE	FALSE	0.00203343	0.53	TRUE	5	178160975	0.039298	6.17988e-06	20.669
juvenile absence epilepsy || id:ieu-b-12	ebi-a-GCST90016942	family Methanobacteriaceae id.121	rs6776814	T	C	T	C	-0.199566	0.000722805	NA	0.0908387	FALSE	FALSE	FALSE	0.00201319	0.719999	TRUE	3	15053083	0.0411825	1.63061e-06	23.4827
juvenile absence epilepsy || id:ieu-b-12	ebi-a-GCST90016942	family Methanobacteriaceae id.121	rs73068003	G	T	G	T	-0.15814	0.00347577	NA	0.123898	FALSE	FALSE	FALSE	0.00178317	0.051	TRUE	7	10773932	0.0351803	8.44578e-06	20.2062
juvenile absence epilepsy || id:ieu-b-12	ebi-a-GCST90016942	family Methanobacteriaceae id.121	rs73457410	A	G	A	G	0.21534	-0.00200309	NA	0.0726517	FALSE	FALSE	FALSE	0.00224314	0.37	TRUE	13	41956181	0.0436695	1.40854e-06	24.316
juvenile absence epilepsy || id:ieu-b-12	ebi-a-GCST90016942	family Methanobacteriaceae id.121	rs75208022	C	T	C	T	-0.227245	-0.000518475	NA	0.0713203	FALSE	FALSE	FALSE	0.00223881	0.82	TRUE	12	21338861	0.048763	5.92107e-06	21.7174
juvenile absence epilepsy || id:ieu-b-12	ebi-a-GCST90016942	family Methanobacteriaceae id.121	rs894996	C	A	C	A	0.216999	-0.00222959	NA	0.0770668	FALSE	FALSE	FALSE	0.00216688	0.3	TRUE	4	104418307	0.0449076	1.87556e-06	23.3494
juvenile absence epilepsy || id:ieu-b-12	ebi-a-GCST90016943	family Oxalobacteraceae id.2966	rs1569853	T	C	T	C	-0.140043	-0.00338584	NA	0.14797	FALSE	FALSE	FALSE	0.00163723	0.0389996	TRUE	6	38550301	0.0281704	7.45178e-07	24.7136
juvenile absence epilepsy || id:ieu-b-12	ebi-a-GCST90016943	family Oxalobacteraceae id.2966	rs17138946	G	T	G	T	-0.189444	-7.30945e-05	NA	0.0543118	FALSE	FALSE	FALSE	0.00254145	0.98	TRUE	16	5984558	0.0430248	8.09003e-06	19.3876
juvenile absence epilepsy || id:ieu-b-12	ebi-a-GCST90016943	family Oxalobacteraceae id.2966	rs36057338	G	T	G	T	0.181604	-0.00286293	NA	0.0677464	FALSE	FALSE	FALSE	0.00231255	0.22	TRUE	4	189935314	0.0398742	6.25792e-06	20.7428
juvenile absence epilepsy || id:ieu-b-12	ebi-a-GCST90016943	family Oxalobacteraceae id.2966	rs4428215	G	A	G	A	0.12561	-0.00203322	NA	0.231497	FALSE	FALSE	FALSE	0.0013722	0.14	TRUE	3	171947435	0.0230053	4.87933e-08	29.8121
juvenile absence epilepsy || id:ieu-b-12	ebi-a-GCST90016943	family Oxalobacteraceae id.2966	rs561239	A	G	A	G	0.105525	0.00121859	NA	0.245379	FALSE	FALSE	FALSE	0.00136252	0.37	TRUE	12	18793583	0.0236769	7.19383e-06	19.8637
juvenile absence epilepsy || id:ieu-b-12	ebi-a-GCST90016943	family Oxalobacteraceae id.2966	rs736744	T	C	T	C	-0.105642	0.00100704	NA	0.597686	FALSE	FALSE	FALSE	0.00119125	0.4	TRUE	9	87514407	0.0200648	1.49417e-07	27.7207
juvenile absence epilepsy || id:ieu-b-12	ebi-a-GCST90016943	family Oxalobacteraceae id.2966	rs80330081	A	C	A	C	-0.18756	-0.00296024	NA	0.0611895	FALSE	FALSE	FALSE	0.00240073	0.22	TRUE	4	67427392	0.0423688	6.64003e-06	19.5969
juvenile absence epilepsy || id:ieu-b-12	ebi-a-GCST90016944	family Pasteurellaceae id.3689	rs10965428	C	A	C	A	-0.119902	0.000929825	NA	0.0837492	FALSE	FALSE	FALSE	0.00208593	0.66	TRUE	9	22718481	0.0258219	4.29151e-06	21.5614
juvenile absence epilepsy || id:ieu-b-12	ebi-a-GCST90016944	family Pasteurellaceae id.3689	rs12050685	A	G	A	G	-0.0670948	-0.00183541	NA	0.386059	FALSE	FALSE	FALSE	0.00118462	0.12	TRUE	15	73477482	0.015239	9.18523e-06	19.385
juvenile absence epilepsy || id:ieu-b-12	ebi-a-GCST90016944	family Pasteurellaceae id.3689	rs9895850	T	C	T	C	-0.176406	-0.00638723	NA	0.0445782	FALSE	FALSE	FALSE	0.0027853	0.0219999	TRUE	17	64535013	0.041017	9.0826e-06	18.4969
juvenile absence epilepsy || id:ieu-b-12	ebi-a-GCST90016945	family Peptococcaceae id.2024	rs12144792	C	T	C	T	0.064399	-0.00151855	NA	0.386603	FALSE	FALSE	FALSE	0.0012005	0.21	TRUE	1	27418225	0.0141246	5.82237e-06	20.7877
juvenile absence epilepsy || id:ieu-b-12	ebi-a-GCST90016945	family Peptococcaceae id.2024	rs75430375	C	T	C	T	-0.147941	0.00251867	NA	0.0612875	FALSE	FALSE	FALSE	0.00241553	0.3	TRUE	5	89252884	0.0317498	3.40847e-06	21.7118
juvenile absence epilepsy || id:ieu-b-12	ebi-a-GCST90016946	family Peptostreptococcaceae id.2042	rs117020988	C	T	C	T	0.182411	-0.00166404	NA	0.0489998	FALSE	FALSE	FALSE	0.00269639	0.54	TRUE	7	46710977	0.0372126	1.02795e-06	24.0282
juvenile absence epilepsy || id:ieu-b-12	ebi-a-GCST90016946	family Peptostreptococcaceae id.2042	rs12986312	T	G	T	G	0.0571818	-0.000315347	NA	0.300347	FALSE	FALSE	FALSE	0.00127048	0.8	TRUE	19	17414138	0.0125947	5.76713e-06	20.6129
juvenile absence epilepsy || id:ieu-b-12	ebi-a-GCST90016946	family Peptostreptococcaceae id.2042	rs4692811	C	T	C	T	0.0642075	0.00164388	NA	0.266909	FALSE	FALSE	FALSE	0.00129898	0.21	TRUE	4	171180190	0.0126913	4.21124e-07	25.5952
juvenile absence epilepsy || id:ieu-b-12	ebi-a-GCST90016946	family Peptostreptococcaceae id.2042	rs59865771	C	T	C	T	-0.0573764	-0.00248623	NA	0.247277	FALSE	FALSE	FALSE	0.00136994	0.0700003	TRUE	16	89246670	0.0127192	7.69024e-06	20.3492
juvenile absence epilepsy || id:ieu-b-12	ebi-a-GCST90016946	family Peptostreptococcaceae id.2042	rs61841503	G	A	G	A	0.0919658	-0.000720083	NA	0.157184	FALSE	FALSE	FALSE	0.00159369	0.649999	TRUE	10	17019559	0.0161331	9.80122e-09	32.495
juvenile absence epilepsy || id:ieu-b-12	ebi-a-GCST90016946	family Peptostreptococcaceae id.2042	rs6721459	G	A	G	A	-0.0509823	-0.000479822	NA	0.465627	FALSE	FALSE	FALSE	0.00115271	0.68	TRUE	2	67852836	0.0111975	5.07762e-06	20.7299
juvenile absence epilepsy || id:ieu-b-12	ebi-a-GCST90016946	family Peptostreptococcaceae id.2042	rs9573937	A	G	A	G	-0.0693637	0.000627005	NA	0.194977	FALSE	FALSE	FALSE	0.00145058	0.67	TRUE	13	77351196	0.0142907	1.70589e-06	23.559
juvenile absence epilepsy || id:ieu-b-12	ebi-a-GCST90016947	family Porphyromonadaceae id.943	rs17065783	A	G	A	G	-0.059133	0.000514735	NA	0.235194	FALSE	FALSE	FALSE	0.00136007	0.709999	TRUE	3	62035586	0.0122235	1.79349e-06	23.4028
juvenile absence epilepsy || id:ieu-b-12	ebi-a-GCST90016947	family Porphyromonadaceae id.943	rs1980561	A	G	A	G	-0.0485289	0.000984136	NA	0.3732	FALSE	FALSE	FALSE	0.00118463	0.41	TRUE	14	63386516	0.0109284	8.9454e-06	19.7191
juvenile absence epilepsy || id:ieu-b-12	ebi-a-GCST90016947	family Porphyromonadaceae id.943	rs35233670	T	C	T	C	-0.0473576	-0.00124078	NA	0.447931	FALSE	FALSE	FALSE	0.00116753	0.29	TRUE	17	63750903	0.010602	7.90988e-06	19.9528
juvenile absence epilepsy || id:ieu-b-12	ebi-a-GCST90016947	family Porphyromonadaceae id.943	rs35961441	A	C	A	C	0.0915257	-0.000296777	NA	0.0766194	FALSE	FALSE	FALSE	0.00218839	0.89	TRUE	1	240929774	0.0207306	8.37394e-06	19.4923
juvenile absence epilepsy || id:ieu-b-12	ebi-a-GCST90016947	family Porphyromonadaceae id.943	rs6953849	A	G	A	G	0.0718149	0.000526506	NA	0.146361	FALSE	FALSE	FALSE	0.00162303	0.75	TRUE	7	69251692	0.0150724	2.44478e-06	22.702
juvenile absence epilepsy || id:ieu-b-12	ebi-a-GCST90016947	family Porphyromonadaceae id.943	rs864093	A	C	A	C	-0.0527939	-0.000683523	NA	0.270173	FALSE	FALSE	FALSE	0.0013025	0.6	TRUE	4	149825977	0.0117499	9.59798e-06	20.1883
juvenile absence epilepsy || id:ieu-b-12	ebi-a-GCST90016948	family Prevotellaceae id.960	rs12118202	T	C	T	C	-0.0751986	0.000876599	NA	0.20376	FALSE	FALSE	FALSE	0.00143491	0.54	TRUE	1	210681370	0.0147265	5.5423e-07	26.0748
juvenile absence epilepsy || id:ieu-b-12	ebi-a-GCST90016948	family Prevotellaceae id.960	rs2206482	T	G	T	G	-0.0569105	0.00120251	NA	0.436374	FALSE	FALSE	FALSE	0.00117874	0.31	TRUE	20	9771109	0.0117486	1.30377e-06	23.4646
juvenile absence epilepsy || id:ieu-b-12	ebi-a-GCST90016948	family Prevotellaceae id.960	rs3758087	C	T	C	T	-0.0564199	0.00109534	NA	0.678472	FALSE	FALSE	FALSE	0.00123533	0.38	TRUE	8	23714609	0.0124655	8.60578e-06	20.4854
juvenile absence epilepsy || id:ieu-b-12	ebi-a-GCST90016948	family Prevotellaceae id.960	rs3860225	A	G	A	G	0.083936	-0.000167014	NA	0.136779	FALSE	FALSE	FALSE	0.0016811	0.92	TRUE	1	111161677	0.0167936	5.4968e-07	24.9809
juvenile absence epilepsy || id:ieu-b-12	ebi-a-GCST90016948	family Prevotellaceae id.960	rs4493272	T	C	T	C	-0.0604992	0.00168025	NA	0.419979	FALSE	FALSE	FALSE	0.00117858	0.15	TRUE	2	118910912	0.0118027	3.02315e-07	26.2746
juvenile absence epilepsy || id:ieu-b-12	ebi-a-GCST90016948	family Prevotellaceae id.960	rs4685827	T	C	T	C	-0.0679529	-0.000208731	NA	0.203301	FALSE	FALSE	FALSE	0.00143627	0.88	TRUE	3	4864877	0.0145407	2.77192e-06	21.8396
juvenile absence epilepsy || id:ieu-b-12	ebi-a-GCST90016948	family Prevotellaceae id.960	rs7252711	G	A	G	A	0.0740876	-0.00192472	NA	0.869998	FALSE	FALSE	FALSE	0.00170741	0.26	TRUE	19	17460999	0.0161926	5.56583e-06	20.9343
juvenile absence epilepsy || id:ieu-b-12	ebi-a-GCST90016948	family Prevotellaceae id.960	rs7975087	C	A	C	A	-0.0601448	0.00235406	NA	0.236466	FALSE	FALSE	FALSE	0.0013611	0.0840001	TRUE	12	21404832	0.0135454	7.59451e-06	19.7157
juvenile absence epilepsy || id:ieu-b-12	ebi-a-GCST90016948	family Prevotellaceae id.960	rs9586501	G	A	G	A	0.0592681	-0.00156953	NA	0.30537	FALSE	FALSE	FALSE	0.00126317	0.21	TRUE	13	105075823	0.0127329	2.58988e-06	21.6664
juvenile absence epilepsy || id:ieu-b-12	ebi-a-GCST90016948	family Prevotellaceae id.960	rs9958960	G	A	G	A	-0.0914807	-0.00148121	NA	0.141642	FALSE	FALSE	FALSE	0.00166119	0.37	TRUE	18	63018983	0.0173611	1.06324e-07	27.7654
juvenile absence epilepsy || id:ieu-b-12	ebi-a-GCST90016949	family Rhodospirillaceae id.2717	rs1035406	G	A	G	A	-0.11354	-0.001208	NA	0.109414	FALSE	FALSE	FALSE	0.00185411	0.51	TRUE	5	119372737	0.0250863	5.84454e-06	20.4845
juvenile absence epilepsy || id:ieu-b-12	ebi-a-GCST90016949	family Rhodospirillaceae id.2717	rs11591293	G	T	G	T	0.0743184	-0.000270716	NA	0.389527	FALSE	FALSE	FALSE	0.00118253	0.82	TRUE	10	113419797	0.0158724	2.67147e-06	21.9234
juvenile absence epilepsy || id:ieu-b-12	ebi-a-GCST90016949	family Rhodospirillaceae id.2717	rs1549633	A	C	A	C	0.0999312	-0.000583532	NA	0.138117	FALSE	FALSE	FALSE	0.00169865	0.73	TRUE	5	27945645	0.0218634	4.70392e-06	20.8914
juvenile absence epilepsy || id:ieu-b-12	ebi-a-GCST90016949	family Rhodospirillaceae id.2717	rs1923415	A	G	A	G	-0.0999238	0.000839983	NA	0.121346	FALSE	FALSE	FALSE	0.00177496	0.64	TRUE	6	89268715	0.0227326	9.63696e-06	19.3214
juvenile absence epilepsy || id:ieu-b-12	ebi-a-GCST90016949	family Rhodospirillaceae id.2717	rs3754624	C	T	C	T	0.0971389	0.00017989	NA	0.176157	FALSE	FALSE	FALSE	0.00151424	0.91	TRUE	2	225633812	0.0200064	1.71479e-06	23.5748
juvenile absence epilepsy || id:ieu-b-12	ebi-a-GCST90016949	family Rhodospirillaceae id.2717	rs4278423	T	C	T	C	0.107529	-0.0047881	NA	0.114224	FALSE	FALSE	FALSE	0.0018161	0.00840001	TRUE	10	2670553	0.0235725	3.12018e-06	20.8085
juvenile absence epilepsy || id:ieu-b-12	ebi-a-GCST90016949	family Rhodospirillaceae id.2717	rs55876211	C	T	C	T	-0.0911851	0.00112223	NA	0.186461	FALSE	FALSE	FALSE	0.00147696	0.450001	TRUE	3	84471266	0.0196395	2.86682e-06	21.5569
juvenile absence epilepsy || id:ieu-b-12	ebi-a-GCST90016949	family Rhodospirillaceae id.2717	rs6679026	T	C	T	C	0.111984	-0.00106854	NA	0.103482	FALSE	FALSE	FALSE	0.00189478	0.57	TRUE	1	78619512	0.0251088	9.94672e-06	19.8912
juvenile absence epilepsy || id:ieu-b-12	ebi-a-GCST90016949	family Rhodospirillaceae id.2717	rs7001029	C	T	C	T	0.117366	-0.00043086	NA	0.0964394	FALSE	FALSE	FALSE	0.00196472	0.83	TRUE	8	131958403	0.0261324	5.34749e-06	20.1709
juvenile absence epilepsy || id:ieu-b-12	ebi-a-GCST90016949	family Rhodospirillaceae id.2717	rs72714493	A	G	A	G	0.0816858	-0.00281582	NA	0.241608	FALSE	FALSE	FALSE	0.00136549	0.0389996	TRUE	1	92206218	0.0180791	7.3492e-06	20.4145
juvenile absence epilepsy || id:ieu-b-12	ebi-a-GCST90016949	family Rhodospirillaceae id.2717	rs76784716	A	G	A	G	0.136049	-0.00207983	NA	0.0718468	FALSE	FALSE	FALSE	0.00223705	0.35	TRUE	2	169033340	0.0285767	1.48988e-06	22.6656
juvenile absence epilepsy || id:ieu-b-12	ebi-a-GCST90016949	family Rhodospirillaceae id.2717	rs9813022	A	G	A	G	-0.0842444	0.00237648	NA	0.312862	FALSE	FALSE	FALSE	0.00124719	0.0569994	TRUE	3	13726736	0.0163583	2.53122e-07	26.522
juvenile absence epilepsy || id:ieu-b-12	ebi-a-GCST90016950	family Rikenellaceae id.967	rs10217435	C	T	C	T	-0.0883756	-6.11597e-05	NA	0.0773705	FALSE	FALSE	FALSE	0.00215456	0.98	TRUE	9	86052655	0.0197506	6.50759e-06	20.0218
juvenile absence epilepsy || id:ieu-b-12	ebi-a-GCST90016950	family Rikenellaceae id.967	rs2833282	G	A	G	A	0.0711137	-0.0022729	NA	0.120257	FALSE	FALSE	FALSE	0.00178585	0.2	TRUE	21	32496710	0.0156966	4.31102e-06	20.5256
juvenile absence epilepsy || id:ieu-b-12	ebi-a-GCST90016950	family Rikenellaceae id.967	rs35909684	A	C	A	C	-0.0850181	0.00118858	NA	0.0884326	FALSE	FALSE	FALSE	0.00204514	0.56	TRUE	8	144441740	0.0191539	7.09823e-06	19.7019
juvenile absence epilepsy || id:ieu-b-12	ebi-a-GCST90016950	family Rikenellaceae id.967	rs4264350	T	C	T	C	-0.0526393	-0.00112858	NA	0.397113	FALSE	FALSE	FALSE	0.00117906	0.34	TRUE	15	71658642	0.0108555	1.34831e-06	23.5137
juvenile absence epilepsy || id:ieu-b-12	ebi-a-GCST90016950	family Rikenellaceae id.967	rs62532512	A	C	A	C	0.0504257	0.000601063	NA	0.546749	FALSE	FALSE	FALSE	0.00118023	0.61	TRUE	9	14158854	0.0107399	2.76427e-06	22.0447
juvenile absence epilepsy || id:ieu-b-12	ebi-a-GCST90016950	family Rikenellaceae id.967	rs67705352	T	G	T	G	-0.0549688	0.00100124	NA	0.369803	FALSE	FALSE	FALSE	0.0012032	0.41	TRUE	1	19790706	0.0110534	6.57552e-07	24.7309
juvenile absence epilepsy || id:ieu-b-12	ebi-a-GCST90016950	family Rikenellaceae id.967	rs77885767	C	T	C	T	-0.156209	0.00441367	NA	0.0470787	FALSE	FALSE	FALSE	0.00275294	0.11	TRUE	14	21548634	0.0336482	2.84695e-06	21.552
juvenile absence epilepsy || id:ieu-b-12	ebi-a-GCST90016950	family Rikenellaceae id.967	rs9389714	C	T	C	T	-0.0636841	0.00164928	NA	0.148578	FALSE	FALSE	FALSE	0.00161471	0.31	TRUE	6	100244667	0.0143416	8.79063e-06	19.7182
juvenile absence epilepsy || id:ieu-b-12	ebi-a-GCST90016950	family Rikenellaceae id.967	rs9603208	G	T	G	T	0.0821173	-0.00127374	NA	0.107648	FALSE	FALSE	FALSE	0.00186747	0.5	TRUE	13	38044689	0.0159596	1.91801e-07	26.4744
juvenile absence epilepsy || id:ieu-b-12	ebi-a-GCST90016951	family Ruminococcaceae id.2050	rs10093275	T	C	T	C	-0.0534595	0.000796123	NA	0.713145	FALSE	FALSE	FALSE	0.00127714	0.53	TRUE	8	69732887	0.011677	5.35229e-06	20.9598
juvenile absence epilepsy || id:ieu-b-12	ebi-a-GCST90016951	family Ruminococcaceae id.2050	rs10166469	C	T	C	T	0.053336	0.00058158	NA	0.740478	FALSE	FALSE	FALSE	0.00131902	0.66	TRUE	2	29829167	0.0120209	8.52158e-06	19.6864
juvenile absence epilepsy || id:ieu-b-12	ebi-a-GCST90016951	family Ruminococcaceae id.2050	rs1158100	G	A	G	A	0.0490539	-0.000570544	NA	0.625797	FALSE	FALSE	FALSE	0.00119531	0.630001	TRUE	8	4555684	0.0109865	8.60855e-06	19.9356
juvenile absence epilepsy || id:ieu-b-12	ebi-a-GCST90016951	family Ruminococcaceae id.2050	rs17376049	T	C	T	C	0.0848534	-0.0010079	NA	0.106204	FALSE	FALSE	FALSE	0.00186908	0.59	TRUE	1	61425267	0.0172114	7.29625e-07	24.3056
juvenile absence epilepsy || id:ieu-b-12	ebi-a-GCST90016951	family Ruminococcaceae id.2050	rs2113833	C	T	C	T	-0.169146	-0.00268126	NA	0.963137	FALSE	FALSE	FALSE	0.00305874	0.38	TRUE	2	218216801	0.0355009	1.14464e-06	22.701
juvenile absence epilepsy || id:ieu-b-12	ebi-a-GCST90016952	family Streptococcaceae id.1850	rs10028567	C	T	C	T	-0.0934027	0.000906447	NA	0.0883998	FALSE	FALSE	FALSE	0.00203509	0.66	TRUE	4	53657577	0.0190343	3.72495e-06	24.0794
juvenile absence epilepsy || id:ieu-b-12	ebi-a-GCST90016952	family Streptococcaceae id.1850	rs11110281	T	C	T	C	-0.130554	0.000197088	NA	0.0612108	FALSE	FALSE	FALSE	0.00240187	0.93	TRUE	12	100584014	0.0225943	1.40136e-08	33.3874
juvenile absence epilepsy || id:ieu-b-12	ebi-a-GCST90016952	family Streptococcaceae id.1850	rs4968759	A	G	A	G	-0.0544035	-0.000169633	NA	0.439867	FALSE	FALSE	FALSE	0.00116677	0.88	TRUE	17	61298020	0.0111271	8.91887e-07	23.9051
juvenile absence epilepsy || id:ieu-b-12	ebi-a-GCST90016952	family Streptococcaceae id.1850	rs57646748	G	A	G	A	-0.088021	0.000955252	NA	0.0697879	FALSE	FALSE	FALSE	0.00228137	0.68	TRUE	4	37452858	0.019876	7.88352e-06	19.6117
juvenile absence epilepsy || id:ieu-b-12	ebi-a-GCST90016952	family Streptococcaceae id.1850	rs6806351	T	C	T	C	-0.0619209	0.000642028	NA	0.227122	FALSE	FALSE	FALSE	0.00139606	0.649999	TRUE	3	132058723	0.0135744	6.93793e-06	20.8081
juvenile absence epilepsy || id:ieu-b-12	ebi-a-GCST90016952	family Streptococcaceae id.1850	rs77968078	G	A	G	A	-0.0993013	0.00430051	NA	0.061263	FALSE	FALSE	FALSE	0.00239949	0.0729995	TRUE	1	240441766	0.0224788	7.93341e-06	19.5148
juvenile absence epilepsy || id:ieu-b-12	ebi-a-GCST90016952	family Streptococcaceae id.1850	rs7916711	A	G	A	G	0.0959639	-0.00292353	NA	0.062772	FALSE	FALSE	FALSE	0.00237026	0.22	TRUE	10	28588269	0.021545	6.32732e-06	19.8391
juvenile absence epilepsy || id:ieu-b-12	ebi-a-GCST90016956	family Veillonellaceae id.2172	rs11700976	C	A	C	A	0.0503337	-0.000113571	NA	0.485052	FALSE	FALSE	FALSE	0.0011741	0.92	TRUE	21	35576123	0.0113763	9.2538e-06	19.5756
juvenile absence epilepsy || id:ieu-b-12	ebi-a-GCST90016956	family Veillonellaceae id.2172	rs12741784	C	T	C	T	-0.0621452	-0.00157315	NA	0.364874	FALSE	FALSE	FALSE	0.00119681	0.19	TRUE	1	50088819	0.0119266	1.28493e-07	27.1508
juvenile absence epilepsy || id:ieu-b-12	ebi-a-GCST90016956	family Veillonellaceae id.2172	rs1442060	A	G	A	G	0.0514024	0.000301503	NA	0.494254	FALSE	FALSE	FALSE	0.00117794	0.8	TRUE	4	46366067	0.0112125	4.50671e-06	21.0166
juvenile absence epilepsy || id:ieu-b-12	ebi-a-GCST90016956	family Veillonellaceae id.2172	rs2175069	G	A	G	A	0.0526752	-0.000196603	NA	0.617349	FALSE	FALSE	FALSE	0.00119338	0.87	TRUE	4	23317124	0.0114886	4.63554e-06	21.0222
juvenile absence epilepsy || id:ieu-b-12	ebi-a-GCST90016956	family Veillonellaceae id.2172	rs2561116	T	G	T	G	-0.083617	0.00165446	NA	0.0978859	FALSE	FALSE	FALSE	0.00195079	0.4	TRUE	5	38348199	0.0187159	7.88515e-06	19.9603
juvenile absence epilepsy || id:ieu-b-12	ebi-a-GCST90016956	family Veillonellaceae id.2172	rs2585520	G	T	G	T	-0.0904972	-0.00164928	NA	0.0862585	FALSE	FALSE	FALSE	0.00205843	0.42	TRUE	13	78785141	0.0200428	5.26926e-06	20.387
juvenile absence epilepsy || id:ieu-b-12	ebi-a-GCST90016956	family Veillonellaceae id.2172	rs4263802	A	G	A	G	-0.050942	-0.000882241	NA	0.603374	FALSE	FALSE	FALSE	0.00118248	0.46	TRUE	8	138319508	0.0114921	7.45006e-06	19.6496
juvenile absence epilepsy || id:ieu-b-12	ebi-a-GCST90016956	family Veillonellaceae id.2172	rs4461038	G	A	G	A	0.0554965	0.00150038	NA	0.651366	FALSE	FALSE	FALSE	0.00120607	0.21	TRUE	15	78546996	0.0119467	3.73474e-06	21.5792
juvenile absence epilepsy || id:ieu-b-12	ebi-a-GCST90016956	family Veillonellaceae id.2172	rs4797169	T	C	T	C	0.0587799	0.00143375	NA	0.244621	FALSE	FALSE	FALSE	0.00134475	0.29	TRUE	18	462180	0.0128297	4.49345e-06	20.9906
juvenile absence epilepsy || id:ieu-b-12	ebi-a-GCST90016956	family Veillonellaceae id.2172	rs6909981	C	T	C	T	-0.0638696	0.00011206	NA	0.204614	FALSE	FALSE	FALSE	0.00144151	0.94	TRUE	6	75534152	0.0141765	5.47621e-06	20.2979
juvenile absence epilepsy || id:ieu-b-12	ebi-a-GCST90016956	family Veillonellaceae id.2172	rs9345168	A	C	A	C	-0.0509102	0.00247575	NA	0.509385	FALSE	FALSE	FALSE	0.00115595	0.032	TRUE	6	92380922	0.0113253	8.48887e-06	20.2074
juvenile absence epilepsy || id:ieu-b-12	ebi-a-GCST90016957	family Verrucomicrobiaceae id.4036	rs117107102	A	G	A	G	0.204683	0.000379727	NA	0.0324654	FALSE	FALSE	FALSE	0.00329567	0.91	TRUE	18	49473635	0.0431572	2.91823e-06	22.4935
juvenile absence epilepsy || id:ieu-b-12	ebi-a-GCST90016957	family Verrucomicrobiaceae id.4036	rs11729256	T	C	T	C	0.0749798	-0.00187132	NA	0.244418	FALSE	FALSE	FALSE	0.00134517	0.16	TRUE	4	95027272	0.0150177	6.73085e-07	24.9277
juvenile absence epilepsy || id:ieu-b-12	ebi-a-GCST90016957	family Verrucomicrobiaceae id.4036	rs12908520	G	A	G	A	0.0619104	0.000241586	NA	0.441812	FALSE	FALSE	FALSE	0.00116782	0.84	TRUE	15	97570657	0.0130946	2.15139e-06	22.3534
juvenile absence epilepsy || id:ieu-b-12	ebi-a-GCST90016957	family Verrucomicrobiaceae id.4036	rs4936098	G	A	G	A	-0.0648691	-0.000975015	NA	0.635363	FALSE	FALSE	FALSE	0.00122412	0.43	TRUE	11	130280667	0.0135928	1.1293e-06	22.775
juvenile absence epilepsy || id:ieu-b-12	ebi-a-GCST90016957	family Verrucomicrobiaceae id.4036	rs61779207	G	A	G	A	-0.0758811	0.00095271	NA	0.184765	FALSE	FALSE	FALSE	0.00150117	0.53	TRUE	1	41074472	0.0167762	6.63025e-06	20.4588
juvenile absence epilepsy || id:ieu-b-12	ebi-a-GCST90016957	family Verrucomicrobiaceae id.4036	rs74542928	T	C	T	C	0.112124	-0.00060169	NA	0.0948378	FALSE	FALSE	FALSE	0.00197685	0.760001	TRUE	4	100544188	0.0236422	1.64611e-06	22.4917
juvenile absence epilepsy || id:ieu-b-12	ebi-a-GCST90016957	family Verrucomicrobiaceae id.4036	rs9349825	A	G	A	G	-0.0704354	0.000890203	NA	0.268005	FALSE	FALSE	FALSE	0.00131518	0.5	TRUE	6	56341481	0.0147128	2.51287e-06	22.9188
juvenile absence epilepsy || id:ieu-b-12	ebi-a-GCST90016957	family Verrucomicrobiaceae id.4036	rs941682	G	A	G	A	-0.0631526	0.000444126	NA	0.279445	FALSE	FALSE	FALSE	0.00129542	0.73	TRUE	20	31867840	0.0143767	9.5812e-06	19.2959
juvenile absence epilepsy || id:ieu-b-12	ebi-a-GCST90016958	family Victivallaceae id.2255	rs11764871	G	T	G	T	0.127099	2.09145e-05	NA	0.281156	FALSE	FALSE	FALSE	0.00129329	0.99	TRUE	7	146808977	0.025656	7.4929e-07	24.5418
juvenile absence epilepsy || id:ieu-b-12	ebi-a-GCST90016958	family Victivallaceae id.2255	rs2944282	T	C	T	C	-0.124197	0.00100463	NA	0.29593	FALSE	FALSE	FALSE	0.00127153	0.43	TRUE	7	57589803	0.0257026	1.56603e-06	23.349
juvenile absence epilepsy || id:ieu-b-12	ebi-a-GCST90016958	family Victivallaceae id.2255	rs4396289	C	T	C	T	-0.152918	0.00506531	NA	0.165333	FALSE	FALSE	FALSE	0.00155675	0.00109999	TRUE	11	9316730	0.0288525	1.53784e-07	28.0899
juvenile absence epilepsy || id:ieu-b-12	ebi-a-GCST90016958	family Victivallaceae id.2255	rs62570196	C	T	C	T	-0.246101	0.00154709	NA	0.0642548	FALSE	FALSE	FALSE	0.00238713	0.52	TRUE	9	111086170	0.0483077	2.69855e-07	25.9534
juvenile absence epilepsy || id:ieu-b-12	ebi-a-GCST90016958	family Victivallaceae id.2255	rs6545794	A	G	A	G	-0.197786	-0.00124881	NA	0.0753113	FALSE	FALSE	FALSE	0.00217241	0.57	TRUE	2	60484909	0.0410495	5.97008e-07	23.2154
juvenile absence epilepsy || id:ieu-b-12	ebi-a-GCST90016958	family Victivallaceae id.2255	rs7077363	G	A	G	A	0.148942	-0.000677773	NA	0.155137	FALSE	FALSE	FALSE	0.00159336	0.67	TRUE	10	95286954	0.0318366	2.83374e-06	21.8867
juvenile absence epilepsy || id:ieu-b-12	ebi-a-GCST90016958	family Victivallaceae id.2255	rs7314815	G	A	G	A	0.101088	9.07e-05	NA	0.507934	FALSE	FALSE	FALSE	0.00115399	0.94	TRUE	12	102525047	0.0225594	6.40088e-06	20.0791
juvenile absence epilepsy || id:ieu-b-12	ebi-a-GCST90016959	genus Actinomyces id.423	rs34583783	G	T	G	T	0.126596	-0.000120386	NA	0.108536	FALSE	FALSE	FALSE	0.00185519	0.95	TRUE	6	67207371	0.0268461	4.48528e-06	22.2371
juvenile absence epilepsy || id:ieu-b-12	ebi-a-GCST90016959	genus Actinomyces id.423	rs71315246	A	G	A	G	-0.0969809	0.002436	NA	0.151421	FALSE	FALSE	FALSE	0.00161281	0.13	TRUE	3	101352439	0.021925	9.82969e-06	19.5656
juvenile absence epilepsy || id:ieu-b-12	ebi-a-GCST90016959	genus Actinomyces id.423	rs7915461	C	T	C	T	-0.18776	-0.000452246	NA	0.940411	FALSE	FALSE	FALSE	0.00244251	0.85	TRUE	10	127532121	0.0401636	5.91984e-06	21.8545
juvenile absence epilepsy || id:ieu-b-12	ebi-a-GCST90016960	genus Adlercreutzia id.812	rs11604400	C	T	C	T	-0.102524	0.00406756	NA	0.113621	FALSE	FALSE	FALSE	0.00181937	0.025	TRUE	11	98386085	0.0234834	9.74473e-06	19.0603
juvenile absence epilepsy || id:ieu-b-12	ebi-a-GCST90016960	genus Adlercreutzia id.812	rs13231526	C	A	C	A	0.143237	-0.00513439	NA	0.0725249	FALSE	FALSE	FALSE	0.0022438	0.0219999	TRUE	7	48844151	0.0311654	4.8136e-06	21.1235
juvenile absence epilepsy || id:ieu-b-12	ebi-a-GCST90016960	genus Adlercreutzia id.812	rs2717140	C	T	C	T	-0.119225	0.00365612	NA	0.100879	FALSE	FALSE	FALSE	0.00191165	0.0560003	TRUE	18	75009770	0.0251081	2.04593e-06	22.5479
juvenile absence epilepsy || id:ieu-b-12	ebi-a-GCST90016960	genus Adlercreutzia id.812	rs7680684	T	C	T	C	0.083381	-0.000328653	NA	0.701363	FALSE	FALSE	FALSE	0.00126458	0.79	TRUE	4	171281359	0.0168901	9.769e-07	24.3708
juvenile absence epilepsy || id:ieu-b-12	ebi-a-GCST90016960	genus Adlercreutzia id.812	rs9915817	C	T	C	T	-0.0749219	-0.00165588	NA	0.69364	FALSE	FALSE	FALSE	0.00125759	0.19	TRUE	17	48864179	0.016833	8.21675e-06	19.8105
juvenile absence epilepsy || id:ieu-b-12	ebi-a-GCST90016965	genus Anaerofilum id.2053	rs17012738	T	G	T	G	0.0903417	0.00117073	NA	0.438104	FALSE	FALSE	FALSE	0.00116868	0.32	TRUE	2	76698142	0.0200239	7.24169e-06	20.3554
juvenile absence epilepsy || id:ieu-b-12	ebi-a-GCST90016965	genus Anaerofilum id.2053	rs17096874	C	T	C	T	-0.126337	-0.00163176	NA	0.167225	FALSE	FALSE	FALSE	0.00154772	0.29	TRUE	14	30991358	0.0268919	2.86029e-06	22.0708
juvenile absence epilepsy || id:ieu-b-12	ebi-a-GCST90016965	genus Anaerofilum id.2053	rs4244069	A	G	A	G	0.146775	0.00311596	NA	0.895957	FALSE	FALSE	FALSE	0.0019028	0.1	TRUE	12	67167461	0.0326594	9.81206e-06	20.197
juvenile absence epilepsy || id:ieu-b-12	ebi-a-GCST90016965	genus Anaerofilum id.2053	rs712981	A	C	A	C	0.10076	0.000970921	NA	0.396307	FALSE	FALSE	FALSE	0.00118303	0.41	TRUE	3	129686434	0.0202902	6.83109e-07	24.6606
juvenile absence epilepsy || id:ieu-b-12	ebi-a-GCST90016965	genus Anaerofilum id.2053	rs816292	T	C	T	C	-0.113003	0.00147377	NA	0.272441	FALSE	FALSE	FALSE	0.00128775	0.25	TRUE	12	117811409	0.02204	2.6404e-07	26.288
juvenile absence epilepsy || id:ieu-b-12	ebi-a-GCST90016965	genus Anaerofilum id.2053	rs9299345	T	C	T	C	-0.1364	0.000109861	NA	0.120425	FALSE	FALSE	FALSE	0.00177737	0.95	TRUE	9	104339812	0.0302372	8.04304e-06	20.3491
juvenile absence epilepsy || id:ieu-b-12	ebi-a-GCST90016966	genus Anaerostipes id.1991	rs2014785	T	C	T	C	0.0515687	0.0013802	NA	0.411454	FALSE	FALSE	FALSE	0.0011829	0.24	TRUE	3	171100102	0.0112199	4.68058e-06	21.1249
juvenile absence epilepsy || id:ieu-b-12	ebi-a-GCST90016966	genus Anaerostipes id.1991	rs6474958	G	A	G	A	0.0500065	0.000455358	NA	0.587707	FALSE	FALSE	FALSE	0.00117854	0.7	TRUE	9	1582701	0.0112001	6.74481e-06	19.9347
juvenile absence epilepsy || id:ieu-b-12	ebi-a-GCST90016966	genus Anaerostipes id.1991	rs6854026	C	T	C	T	0.0508482	-7.27739e-05	NA	0.479583	FALSE	FALSE	FALSE	0.00117517	0.95	TRUE	4	169690814	0.0109075	3.1958e-06	21.7321
juvenile absence epilepsy || id:ieu-b-12	ebi-a-GCST90016966	genus Anaerostipes id.1991	rs7193624	T	C	T	C	-0.0750642	0.00113927	NA	0.847921	FALSE	FALSE	FALSE	0.00159644	0.48	TRUE	16	77574020	0.0150723	5.35476e-07	24.8031
juvenile absence epilepsy || id:ieu-b-12	ebi-a-GCST90016975	genus Butyrivibrio id.1993	rs1007475	G	T	G	T	0.118065	-0.00315861	NA	0.310026	FALSE	FALSE	FALSE	0.0012399	0.0109999	TRUE	6	148403405	0.0261271	7.92319e-06	20.4202
juvenile absence epilepsy || id:ieu-b-12	ebi-a-GCST90016975	genus Butyrivibrio id.1993	rs17163238	G	A	G	A	0.140987	7.7903e-05	NA	0.19553	FALSE	FALSE	FALSE	0.00144952	0.96	TRUE	5	128976021	0.0309117	5.51201e-06	20.8023
juvenile absence epilepsy || id:ieu-b-12	ebi-a-GCST90016975	genus Butyrivibrio id.1993	rs4537857	T	C	T	C	-0.12459	0.000225745	NA	0.297209	FALSE	FALSE	FALSE	0.00126805	0.86	TRUE	13	27292666	0.0260992	1.80194e-06	22.7883
juvenile absence epilepsy || id:ieu-b-12	ebi-a-GCST90016975	genus Butyrivibrio id.1993	rs486484	A	G	A	G	-0.108349	-0.000558581	NA	0.473999	FALSE	FALSE	FALSE	0.0011602	0.630001	TRUE	20	811507	0.0240008	6.61089e-06	20.3797
juvenile absence epilepsy || id:ieu-b-12	ebi-a-GCST90016975	genus Butyrivibrio id.1993	rs4928024	G	A	G	A	0.17471	0.00189473	NA	0.901271	FALSE	FALSE	FALSE	0.00194035	0.33	TRUE	3	54288503	0.0389333	8.18634e-06	20.1369
juvenile absence epilepsy || id:ieu-b-12	ebi-a-GCST90016975	genus Butyrivibrio id.1993	rs77356209	T	C	T	C	0.216874	-0.00273045	NA	0.0592335	FALSE	FALSE	FALSE	0.00247455	0.27	TRUE	18	10267733	0.0483299	6.66423e-06	20.1365
juvenile absence epilepsy || id:ieu-b-12	ebi-a-GCST90016975	genus Butyrivibrio id.1993	rs7752361	G	A	G	A	0.11923	-0.000299271	NA	0.537977	FALSE	FALSE	FALSE	0.00115542	0.8	TRUE	6	111780705	0.0239975	7.69113e-07	24.6853
juvenile absence epilepsy || id:ieu-b-12	ebi-a-GCST90016975	genus Butyrivibrio id.1993	rs9349693	G	A	G	A	-0.117973	0.000401106	NA	0.68523	FALSE	FALSE	FALSE	0.00123459	0.75	TRUE	6	53939724	0.0259861	5.54958e-06	20.6102
juvenile absence epilepsy || id:ieu-b-12	ebi-a-GCST90016977	genus Catenibacterium id.2153	rs12404911	C	T	C	T	0.140717	2.81861e-05	NA	0.186909	FALSE	FALSE	FALSE	0.00149905	0.98	TRUE	1	240118443	0.0304142	2.79892e-06	21.4062
juvenile absence epilepsy || id:ieu-b-12	ebi-a-GCST90016977	genus Catenibacterium id.2153	rs212393	A	G	A	G	0.135254	0.00250094	NA	0.692868	FALSE	FALSE	FALSE	0.00126075	0.0470002	TRUE	6	159485742	0.0286209	3.62485e-06	22.3323
juvenile absence epilepsy || id:ieu-b-12	ebi-a-GCST90016977	genus Catenibacterium id.2153	rs7742829	C	T	C	T	0.11411	0.000244801	NA	0.403088	FALSE	FALSE	FALSE	0.00118031	0.84	TRUE	6	105089665	0.0251099	5.60725e-06	20.6518
juvenile absence epilepsy || id:ieu-b-12	ebi-a-GCST90016978	genus Christensenellaceae R 7group id.11283	rs17081797	A	G	A	G	-0.0904325	-0.000100003	NA	0.0750911	FALSE	FALSE	FALSE	0.00220349	0.96	TRUE	18	67555560	0.0204253	3.34033e-06	19.6025
juvenile absence epilepsy || id:ieu-b-12	ebi-a-GCST90016978	genus Christensenellaceae R 7group id.11283	rs62190261	A	C	A	C	0.0958394	0.0056658	NA	0.0681885	FALSE	FALSE	FALSE	0.00231816	0.015	TRUE	2	230943099	0.0214723	8.74017e-06	19.9219
juvenile absence epilepsy || id:ieu-b-12	ebi-a-GCST90016978	genus Christensenellaceae R 7group id.11283	rs78521377	C	T	C	T	0.124992	-0.000883338	NA	0.0492078	FALSE	FALSE	FALSE	0.00266427	0.74	TRUE	10	126448374	0.0274797	5.60673e-06	20.689
juvenile absence epilepsy || id:ieu-b-12	ebi-a-GCST90016978	genus Christensenellaceae R 7group id.11283	rs892686	A	G	A	G	0.0514099	0.00136768	NA	0.466413	FALSE	FALSE	FALSE	0.00115831	0.24	TRUE	9	83043376	0.011136	3.96862e-06	21.3125
juvenile absence epilepsy || id:ieu-b-12	ebi-a-GCST90016979	genus Clostridium innocuum group id.14397	rs10074000	T	C	T	C	-0.102648	0.000760375	NA	0.402629	FALSE	FALSE	FALSE	0.00121747	0.53	TRUE	5	113126539	0.0227508	6.99939e-06	20.3567
juvenile absence epilepsy || id:ieu-b-12	ebi-a-GCST90016979	genus Clostridium innocuum group id.14397	rs10506058	A	G	A	G	0.0997048	0.0020491	NA	0.406841	FALSE	FALSE	FALSE	0.00117479	0.0810009	TRUE	12	30268485	0.0221926	8.92442e-06	20.1844
juvenile absence epilepsy || id:ieu-b-12	ebi-a-GCST90016979	genus Clostridium innocuum group id.14397	rs61267978	T	C	T	C	0.14708	-0.00252384	NA	0.137403	FALSE	FALSE	FALSE	0.00167457	0.13	TRUE	18	6348227	0.0320875	5.58509e-06	21.0105
juvenile absence epilepsy || id:ieu-b-12	ebi-a-GCST90016979	genus Clostridium innocuum group id.14397	rs6890185	C	T	C	T	-0.113424	1.57663e-05	NA	0.664269	FALSE	FALSE	FALSE	0.00122065	0.99	TRUE	5	71186626	0.0233137	1.12243e-06	23.6694
juvenile absence epilepsy || id:ieu-b-12	ebi-a-GCST90016981	genus Collinsella id.815	rs10890671	C	T	C	T	0.0537401	0.000260773	NA	0.492916	FALSE	FALSE	FALSE	0.00114919	0.82	TRUE	11	107123199	0.0118848	6.52139e-06	20.4462
juvenile absence epilepsy || id:ieu-b-12	ebi-a-GCST90016981	genus Collinsella id.815	rs11597285	G	T	G	T	-0.0537947	-0.000961429	NA	0.422802	FALSE	FALSE	FALSE	0.00117071	0.41	TRUE	10	8589813	0.0120548	9.37605e-06	19.914
juvenile absence epilepsy || id:ieu-b-12	ebi-a-GCST90016981	genus Collinsella id.815	rs2103510	G	A	G	A	0.0786551	0.00307461	NA	0.126388	FALSE	FALSE	FALSE	0.00174536	0.0779992	TRUE	21	29355467	0.0168217	2.42477e-06	21.8632
juvenile absence epilepsy || id:ieu-b-12	ebi-a-GCST90016981	genus Collinsella id.815	rs62448871	C	A	C	A	-0.0540309	0.000882051	NA	0.434421	FALSE	FALSE	FALSE	0.0011869	0.46	TRUE	7	24465024	0.0120324	6.7825e-06	20.1641
juvenile absence epilepsy || id:ieu-b-12	ebi-a-GCST90016981	genus Collinsella id.815	rs9541268	C	A	C	A	0.09597	0.00197097	NA	0.108429	FALSE	FALSE	FALSE	0.00187876	0.29	TRUE	13	68610061	0.0197312	8.79427e-07	23.6572
juvenile absence epilepsy || id:ieu-b-12	ebi-a-GCST90016986	genus Defluviitaleaceae UCG011 id.11287	rs2892880	G	A	G	A	0.0817755	-0.00215008	NA	0.247029	FALSE	FALSE	FALSE	0.00135554	0.11	TRUE	4	120741726	0.0181686	6.82889e-06	20.2583
juvenile absence epilepsy || id:ieu-b-12	ebi-a-GCST90016986	genus Defluviitaleaceae UCG011 id.11287	rs4344384	T	G	T	G	-0.0715978	-0.00211091	NA	0.511285	FALSE	FALSE	FALSE	0.00117074	0.0710003	TRUE	10	66407366	0.0156309	4.83237e-06	20.9813
juvenile absence epilepsy || id:ieu-b-12	ebi-a-GCST90016986	genus Defluviitaleaceae UCG011 id.11287	rs9725395	A	G	A	G	-0.13834	-0.000945436	NA	0.077398	FALSE	FALSE	FALSE	0.00216265	0.66	TRUE	1	85205632	0.029554	3.51925e-06	21.911
juvenile absence epilepsy || id:ieu-b-12	ebi-a-GCST90016987	genus Desulfovibrio id.3173	rs13066142	G	A	G	A	0.119141	0.00210065	NA	0.0820375	FALSE	FALSE	FALSE	0.00208608	0.31	TRUE	3	67478973	0.0250891	3.78669e-06	22.5503
juvenile absence epilepsy || id:ieu-b-12	ebi-a-GCST90016987	genus Desulfovibrio id.3173	rs16863365	A	G	A	G	0.109402	-0.00411045	NA	0.12073	FALSE	FALSE	FALSE	0.00178296	0.021	TRUE	2	198089911	0.0226964	1.79449e-06	23.2347
juvenile absence epilepsy || id:ieu-b-12	ebi-a-GCST90016987	genus Desulfovibrio id.3173	rs72647089	T	G	T	G	-0.106594	-0.00173951	NA	0.0988879	FALSE	FALSE	FALSE	0.00192385	0.37	TRUE	8	57972916	0.0239337	8.29755e-06	19.8356
juvenile absence epilepsy || id:ieu-b-12	ebi-a-GCST90016988	genus Dialister id.2183	rs10138457	T	C	T	C	-0.113054	-0.00432865	NA	0.0658456	FALSE	FALSE	FALSE	0.00233297	0.064	TRUE	14	102458052	0.0261933	7.88116e-06	18.6291
juvenile absence epilepsy || id:ieu-b-12	ebi-a-GCST90016988	genus Dialister id.2183	rs10938938	A	G	A	G	0.0773514	0.000978596	NA	0.817906	FALSE	FALSE	FALSE	0.00150689	0.52	TRUE	4	23294359	0.0170915	7.37055e-06	20.4822
juvenile absence epilepsy || id:ieu-b-12	ebi-a-GCST90016988	genus Dialister id.2183	rs11166701	G	A	G	A	-0.0655301	-0.0013007	NA	0.507538	FALSE	FALSE	FALSE	0.00116931	0.27	TRUE	8	138295725	0.013186	5.50744e-07	24.6976
juvenile absence epilepsy || id:ieu-b-12	ebi-a-GCST90016988	genus Dialister id.2183	rs2435610	A	C	A	C	0.0647132	3.37665e-05	NA	0.279515	FALSE	FALSE	FALSE	0.00131954	0.98	TRUE	7	150890034	0.0143314	5.93267e-06	20.3896
juvenile absence epilepsy || id:ieu-b-12	ebi-a-GCST90016988	genus Dialister id.2183	rs4747450	C	A	C	A	0.0668509	-0.00134901	NA	0.256631	FALSE	FALSE	FALSE	0.00131586	0.31	TRUE	10	23199653	0.0147685	5.83727e-06	20.49
juvenile absence epilepsy || id:ieu-b-12	ebi-a-GCST90016988	genus Dialister id.2183	rs4753063	A	G	A	G	0.0596297	0.00182828	NA	0.551036	FALSE	FALSE	FALSE	0.00115714	0.11	TRUE	11	92267129	0.0130052	4.8568e-06	21.0228
juvenile absence epilepsy || id:ieu-b-12	ebi-a-GCST90016988	genus Dialister id.2183	rs75416973	A	G	A	G	0.0727223	0.000849023	NA	0.199419	FALSE	FALSE	FALSE	0.00146061	0.56	TRUE	1	172809633	0.016451	9.46085e-06	19.5412
juvenile absence epilepsy || id:ieu-b-12	ebi-a-GCST90016988	genus Dialister id.2183	rs764177	C	A	C	A	-0.0601454	-8.63743e-05	NA	0.329297	FALSE	FALSE	FALSE	0.00123872	0.94	TRUE	3	45809449	0.0135366	9.60771e-06	19.7417
juvenile absence epilepsy || id:ieu-b-12	ebi-a-GCST90016990	genus Eggerthella id.819	rs13070736	A	C	A	C	-0.121331	0.000353778	NA	0.146436	FALSE	FALSE	FALSE	0.00164242	0.83	TRUE	3	20807454	0.0272024	7.61921e-06	19.8943
juvenile absence epilepsy || id:ieu-b-12	ebi-a-GCST90016990	genus Eggerthella id.819	rs1784446	A	G	A	G	-0.0907728	0.00160655	NA	0.562075	FALSE	FALSE	FALSE	0.00116153	0.17	TRUE	11	102461599	0.0198096	5.2313e-06	20.9971
juvenile absence epilepsy || id:ieu-b-12	ebi-a-GCST90016990	genus Eggerthella id.819	rs4985746	A	G	A	G	-0.110522	0.00148404	NA	0.793358	FALSE	FALSE	FALSE	0.00142749	0.3	TRUE	17	17098213	0.0247653	5.71465e-06	19.9164
juvenile absence epilepsy || id:ieu-b-12	ebi-a-GCST90016990	genus Eggerthella id.819	rs6430926	T	C	T	C	-0.0879736	0.00186296	NA	0.505032	FALSE	FALSE	FALSE	0.00117249	0.11	TRUE	2	141337454	0.0197127	8.37124e-06	19.9165
juvenile absence epilepsy || id:ieu-b-12	ebi-a-GCST90016991	genus Eisenbergiella id.11304	rs11027642	C	T	C	T	0.129006	0.0014809	NA	0.123067	FALSE	FALSE	FALSE	0.00175294	0.4	TRUE	11	24001840	0.0284844	4.9187e-06	20.5119
juvenile absence epilepsy || id:ieu-b-12	ebi-a-GCST90016991	genus Eisenbergiella id.11304	rs11079158	T	C	T	C	0.100627	0.00126519	NA	0.225857	FALSE	FALSE	FALSE	0.00137922	0.36	TRUE	17	53367641	0.022546	7.34852e-06	19.92
juvenile absence epilepsy || id:ieu-b-12	ebi-a-GCST90016991	genus Eisenbergiella id.11304	rs11938607	C	T	C	T	-0.0978125	0.0013063	NA	0.758017	FALSE	FALSE	FALSE	0.00133712	0.33	TRUE	4	189060431	0.0216636	8.21826e-06	20.3858
juvenile absence epilepsy || id:ieu-b-12	ebi-a-GCST90016991	genus Eisenbergiella id.11304	rs12710729	C	A	C	A	0.0893384	-0.00136175	NA	0.349034	FALSE	FALSE	FALSE	0.00122472	0.27	TRUE	2	19973210	0.0199069	9.84419e-06	20.1404
juvenile absence epilepsy || id:ieu-b-12	ebi-a-GCST90016991	genus Eisenbergiella id.11304	rs13258851	A	G	A	G	0.137001	-0.00178704	NA	0.10171	FALSE	FALSE	FALSE	0.0018966	0.35	TRUE	8	55330814	0.0302124	7.7464e-06	20.5626
juvenile absence epilepsy || id:ieu-b-12	ebi-a-GCST90016991	genus Eisenbergiella id.11304	rs1508033	A	C	A	C	0.091546	-0.0010755	NA	0.359681	FALSE	FALSE	FALSE	0.00120347	0.37	TRUE	15	53375201	0.0195787	3.22887e-06	21.8631
juvenile absence epilepsy || id:ieu-b-12	ebi-a-GCST90016991	genus Eisenbergiella id.11304	rs1553971	T	G	T	G	0.120965	-0.00235528	NA	0.151015	FALSE	FALSE	FALSE	0.00161878	0.15	TRUE	3	111419486	0.0263054	5.26842e-06	21.1461
juvenile absence epilepsy || id:ieu-b-12	ebi-a-GCST90016991	genus Eisenbergiella id.11304	rs2683098	T	C	T	C	-0.107319	-0.00335734	NA	0.787067	FALSE	FALSE	FALSE	0.00141192	0.017	TRUE	15	36178565	0.022515	2.23748e-06	22.7201
juvenile absence epilepsy || id:ieu-b-12	ebi-a-GCST90016991	genus Eisenbergiella id.11304	rs3812426	A	G	A	G	-0.106447	0.00282997	NA	0.771488	FALSE	FALSE	FALSE	0.00137093	0.0389996	TRUE	8	50822676	0.0224159	2.71688e-06	22.5504
juvenile absence epilepsy || id:ieu-b-12	ebi-a-GCST90016992	genus Enterorhabdus id.820	rs10098492	T	C	T	C	0.132323	0.0020499	NA	0.0878755	FALSE	FALSE	FALSE	0.00202753	0.31	TRUE	8	113109756	0.0293688	6.40575e-06	20.3001
juvenile absence epilepsy || id:ieu-b-12	ebi-a-GCST90016992	genus Enterorhabdus id.820	rs2051957	C	T	C	T	0.0843291	-7.84002e-05	NA	0.249489	FALSE	FALSE	FALSE	0.00132796	0.95	TRUE	7	89709883	0.0189864	8.89857e-06	19.7274
juvenile absence epilepsy || id:ieu-b-12	ebi-a-GCST90016992	genus Enterorhabdus id.820	rs3017103	G	A	G	A	-0.0980897	-0.000111985	NA	0.815793	FALSE	FALSE	FALSE	0.00149499	0.94	TRUE	11	62174193	0.0208995	2.94042e-06	22.028
juvenile absence epilepsy || id:ieu-b-12	ebi-a-GCST90016992	genus Enterorhabdus id.820	rs73331712	T	C	T	C	0.26199	0.00373244	NA	0.0474545	FALSE	FALSE	FALSE	0.0027236	0.17	TRUE	12	69515102	0.055123	4.8492e-06	22.5894
juvenile absence epilepsy || id:ieu-b-12	ebi-a-GCST90016992	genus Enterorhabdus id.820	rs77655283	G	A	G	A	0.132988	0.00363669	NA	0.0668347	FALSE	FALSE	FALSE	0.00233471	0.12	TRUE	2	236439879	0.0298306	5.88044e-06	19.8747
juvenile absence epilepsy || id:ieu-b-12	ebi-a-GCST90016999	genus Eubacterium fissicatena group id.14373	rs1768152	C	T	C	T	-0.139489	-0.000203687	NA	0.847655	FALSE	FALSE	FALSE	0.00161077	0.9	TRUE	3	39604954	0.0316186	8.70062e-06	19.4623
juvenile absence epilepsy || id:ieu-b-12	ebi-a-GCST90016999	genus Eubacterium fissicatena group id.14373	rs6934739	A	G	A	G	0.111463	0.000957115	NA	0.27954	FALSE	FALSE	FALSE	0.00128179	0.46	TRUE	6	39940437	0.0252788	9.75326e-06	19.4423
juvenile absence epilepsy || id:ieu-b-12	ebi-a-GCST90016999	genus Eubacterium fissicatena group id.14373	rs7104872	G	A	G	A	0.138612	-0.000336875	NA	0.183509	FALSE	FALSE	FALSE	0.0015052	0.82	TRUE	11	115165111	0.0291906	2.73149e-06	22.5484
juvenile absence epilepsy || id:ieu-b-12	ebi-a-GCST90017003	genus Eubacterium rectale group id.14374	rs10248854	C	A	C	A	-0.0527827	0.00117711	NA	0.354004	FALSE	FALSE	FALSE	0.00120854	0.33	TRUE	7	121281238	0.0113464	4.20678e-06	21.6405
juvenile absence epilepsy || id:ieu-b-12	ebi-a-GCST90017003	genus Eubacterium rectale group id.14374	rs10797540	A	G	A	G	0.0503179	-0.000345224	NA	0.430491	FALSE	FALSE	FALSE	0.00116875	0.77	TRUE	1	234530370	0.0108389	3.53387e-06	21.5514
juvenile absence epilepsy || id:ieu-b-12	ebi-a-GCST90017003	genus Eubacterium rectale group id.14374	rs2884897	A	G	A	G	-0.129364	0.00196515	NA	0.0447186	FALSE	FALSE	FALSE	0.00278261	0.48	TRUE	11	8129537	0.0289021	6.44421e-06	20.034
juvenile absence epilepsy || id:ieu-b-12	ebi-a-GCST90017003	genus Eubacterium rectale group id.14374	rs35398954	A	G	A	G	-0.0901402	0.00226221	NA	0.11265	FALSE	FALSE	FALSE	0.00184019	0.22	TRUE	15	93006765	0.0174602	5.39946e-07	26.6525
juvenile absence epilepsy || id:ieu-b-12	ebi-a-GCST90017003	genus Eubacterium rectale group id.14374	rs62547233	A	G	A	G	0.0536319	-0.00148799	NA	0.279473	FALSE	FALSE	FALSE	0.0013134	0.26	TRUE	9	92013419	0.0120201	9.89829e-06	19.9081
juvenile absence epilepsy || id:ieu-b-12	ebi-a-GCST90017011	genus Fusicatenibacter id.11305	rs10439674	A	G	A	G	-0.0572129	0.00356672	NA	0.209348	FALSE	FALSE	FALSE	0.00142152	0.012	TRUE	21	42681392	0.0130007	7.68493e-06	19.3666
juvenile absence epilepsy || id:ieu-b-12	ebi-a-GCST90017011	genus Fusicatenibacter id.11305	rs167879	T	C	T	C	0.0659543	-0.000799007	NA	0.83518	FALSE	FALSE	FALSE	0.00156133	0.61	TRUE	20	55937366	0.0148763	5.86894e-06	19.6561
juvenile absence epilepsy || id:ieu-b-12	ebi-a-GCST90017011	genus Fusicatenibacter id.11305	rs2025938	G	A	G	A	-0.0967298	-0.00242118	NA	0.0804204	FALSE	FALSE	FALSE	0.00213348	0.26	TRUE	10	112177119	0.0205426	2.98834e-06	22.1722
juvenile absence epilepsy || id:ieu-b-12	ebi-a-GCST90017011	genus Fusicatenibacter id.11305	rs206581	A	G	A	G	-0.0568339	0.000196896	NA	0.222646	FALSE	FALSE	FALSE	0.00140363	0.89	TRUE	18	10370596	0.0127894	8.95757e-06	19.7476
juvenile absence epilepsy || id:ieu-b-12	ebi-a-GCST90017011	genus Fusicatenibacter id.11305	rs4378146	A	C	A	C	-0.0616691	-0.0007822	NA	0.239677	FALSE	FALSE	FALSE	0.00135304	0.56	TRUE	1	24927625	0.0125259	7.20444e-07	24.2391
juvenile absence epilepsy || id:ieu-b-12	ebi-a-GCST90017011	genus Fusicatenibacter id.11305	rs62187631	T	C	T	C	-0.0710571	0.00275881	NA	0.138903	FALSE	FALSE	FALSE	0.00169044	0.1	TRUE	2	226649570	0.015924	4.54527e-06	19.9118
juvenile absence epilepsy || id:ieu-b-12	ebi-a-GCST90017011	genus Fusicatenibacter id.11305	rs6515626	G	A	G	A	0.141575	0.00233426	NA	0.0431758	FALSE	FALSE	FALSE	0.00284501	0.41	TRUE	20	25257001	0.0313559	7.28652e-06	20.3861
juvenile absence epilepsy || id:ieu-b-12	ebi-a-GCST90017011	genus Fusicatenibacter id.11305	rs73103914	A	G	A	G	-0.0597324	-0.00019729	NA	0.202322	FALSE	FALSE	FALSE	0.00143677	0.89	TRUE	12	58658311	0.0134458	8.29564e-06	19.7354
juvenile absence epilepsy || id:ieu-b-12	ebi-a-GCST90017011	genus Fusicatenibacter id.11305	rs792108	C	T	C	T	0.0508345	-0.000487474	NA	0.644692	FALSE	FALSE	FALSE	0.00123994	0.69	TRUE	2	5532793	0.0113843	8.49533e-06	19.939
juvenile absence epilepsy || id:ieu-b-12	ebi-a-GCST90017011	genus Fusicatenibacter id.11305	rs8028026	G	A	G	A	0.0792146	-0.000347417	NA	0.894256	FALSE	FALSE	FALSE	0.00188527	0.85	TRUE	15	88353215	0.0180505	8.06325e-06	19.2589
juvenile absence epilepsy || id:ieu-b-12	ebi-a-GCST90017011	genus Fusicatenibacter id.11305	rs8063430	T	C	T	C	-0.104026	-0.00151384	NA	0.0576085	FALSE	FALSE	FALSE	0.00248319	0.54	TRUE	16	73821805	0.022217	4.9289e-06	21.9237
juvenile absence epilepsy || id:ieu-b-12	ebi-a-GCST90017012	genus Gordonibacter id.821	rs13412653	A	C	A	C	0.107597	-0.00112895	NA	0.34913	FALSE	FALSE	FALSE	0.00121453	0.35	TRUE	2	30158494	0.0239228	8.61133e-06	20.2291
juvenile absence epilepsy || id:ieu-b-12	ebi-a-GCST90017012	genus Gordonibacter id.821	rs322296	G	A	G	A	0.17869	-0.000286007	NA	0.111488	FALSE	FALSE	FALSE	0.00185291	0.88	TRUE	7	136937189	0.037722	4.0242e-06	22.4394
juvenile absence epilepsy || id:ieu-b-12	ebi-a-GCST90017012	genus Gordonibacter id.821	rs3765837	T	G	T	G	-0.190729	-0.00327809	NA	0.0838509	FALSE	FALSE	FALSE	0.00211674	0.12	TRUE	1	210628449	0.0433608	7.16902e-06	19.3481
juvenile absence epilepsy || id:ieu-b-12	ebi-a-GCST90017012	genus Gordonibacter id.821	rs4596722	G	A	G	A	-0.102908	0.000751351	NA	0.524917	FALSE	FALSE	FALSE	0.00115511	0.52	TRUE	9	88787144	0.0231571	9.0567e-06	19.7483
juvenile absence epilepsy || id:ieu-b-12	ebi-a-GCST90017012	genus Gordonibacter id.821	rs71545975	A	G	A	G	-0.153972	-0.00175632	NA	0.149377	FALSE	FALSE	FALSE	0.00161993	0.28	TRUE	7	47144505	0.0338918	7.03947e-06	20.6393
juvenile absence epilepsy || id:ieu-b-12	ebi-a-GCST90017012	genus Gordonibacter id.821	rs72714787	C	A	C	A	0.181405	-0.00203992	NA	0.0973285	FALSE	FALSE	FALSE	0.00197563	0.3	TRUE	4	136768501	0.0377102	1.42889e-06	23.1409
juvenile absence epilepsy || id:ieu-b-12	ebi-a-GCST90017012	genus Gordonibacter id.821	rs7294633	T	C	T	C	-0.12867	0.00153321	NA	0.691197	FALSE	FALSE	FALSE	0.00125002	0.22	TRUE	12	29024534	0.0249946	3.43764e-07	26.501
juvenile absence epilepsy || id:ieu-b-12	ebi-a-GCST90017019	genus Intestinimonas id.2062	rs12226153	A	G	A	G	-0.151142	0.00236699	NA	0.0557987	FALSE	FALSE	FALSE	0.00252833	0.35	TRUE	11	94364293	0.0306922	5.12165e-07	24.2501
juvenile absence epilepsy || id:ieu-b-12	ebi-a-GCST90017019	genus Intestinimonas id.2062	rs17067892	C	T	C	T	0.107194	-0.00207836	NA	0.0749959	FALSE	FALSE	FALSE	0.00217946	0.34	TRUE	8	3763540	0.0250013	6.37926e-06	18.383
juvenile absence epilepsy || id:ieu-b-12	ebi-a-GCST90017019	genus Intestinimonas id.2062	rs1859797	G	A	G	A	0.060368	0.00145851	NA	0.46778	FALSE	FALSE	FALSE	0.00115757	0.21	TRUE	7	22007303	0.0131793	4.1223e-06	20.9811
juvenile absence epilepsy || id:ieu-b-12	ebi-a-GCST90017019	genus Intestinimonas id.2062	rs6934519	C	T	C	T	0.0692373	-0.000850777	NA	0.253456	FALSE	FALSE	FALSE	0.00133163	0.52	TRUE	6	67200802	0.0151154	8.56959e-06	20.9817
juvenile absence epilepsy || id:ieu-b-12	ebi-a-GCST90017019	genus Intestinimonas id.2062	rs716604	A	G	A	G	0.0818068	0.000666597	NA	0.183094	FALSE	FALSE	FALSE	0.00149514	0.66	TRUE	2	6514088	0.0165992	8.56624e-07	24.2887
juvenile absence epilepsy || id:ieu-b-12	ebi-a-GCST90017019	genus Intestinimonas id.2062	rs72982915	C	T	C	T	0.183158	-0.00174207	NA	0.0449175	FALSE	FALSE	FALSE	0.00280924	0.54	TRUE	2	140898088	0.0402743	4.91157e-06	20.6822
juvenile absence epilepsy || id:ieu-b-12	ebi-a-GCST90017021	genus Lachnospiraceae FCS020 group id.11314	rs10093861	G	A	G	A	-0.0568869	-0.00118568	NA	0.493325	FALSE	FALSE	FALSE	0.00115237	0.3	TRUE	8	121244406	0.0121152	3.05626e-06	22.0477
juvenile absence epilepsy || id:ieu-b-12	ebi-a-GCST90017021	genus Lachnospiraceae FCS020 group id.11314	rs1254846	A	G	A	G	-0.105963	0.00385099	NA	0.923386	FALSE	FALSE	FALSE	0.00217904	0.0769999	TRUE	10	44346094	0.0232501	5.59667e-06	20.7711
juvenile absence epilepsy || id:ieu-b-12	ebi-a-GCST90017021	genus Lachnospiraceae FCS020 group id.11314	rs1363769	C	T	C	T	0.200628	0.00508745	NA	0.951025	FALSE	FALSE	FALSE	0.00266879	0.0569994	TRUE	19	17865305	0.0449372	1.58161e-06	19.9329
juvenile absence epilepsy || id:ieu-b-12	ebi-a-GCST90017021	genus Lachnospiraceae FCS020 group id.11314	rs2322265	C	T	C	T	-0.0666305	0.00176045	NA	0.248613	FALSE	FALSE	FALSE	0.001336	0.19	TRUE	4	166588085	0.0141577	5.20811e-06	22.1493
juvenile absence epilepsy || id:ieu-b-12	ebi-a-GCST90017021	genus Lachnospiraceae FCS020 group id.11314	rs2862811	C	T	C	T	-0.0564927	7.50017e-05	NA	0.555449	FALSE	FALSE	FALSE	0.00115817	0.95	TRUE	3	165996415	0.0121736	3.91913e-06	21.5351
juvenile absence epilepsy || id:ieu-b-12	ebi-a-GCST90017021	genus Lachnospiraceae FCS020 group id.11314	rs3999074	G	T	G	T	-0.0550587	0.0004065	NA	0.422292	FALSE	FALSE	FALSE	0.00116217	0.73	TRUE	10	65563647	0.0121847	6.55043e-06	20.4184
juvenile absence epilepsy || id:ieu-b-12	ebi-a-GCST90017021	genus Lachnospiraceae FCS020 group id.11314	rs9788306	C	T	C	T	-0.062804	-0.000737584	NA	0.296666	FALSE	FALSE	FALSE	0.00127537	0.56	TRUE	13	40419314	0.0130744	1.38618e-06	23.0744
juvenile absence epilepsy || id:ieu-b-12	ebi-a-GCST90017025	genus Lachnospiraceae UCG001 id.11321	rs2050911	G	A	G	A	0.0751466	-0.00021938	NA	0.297601	FALSE	FALSE	FALSE	0.00125778	0.86	TRUE	1	82384407	0.0153934	1.10647e-06	23.8314
juvenile absence epilepsy || id:ieu-b-12	ebi-a-GCST90017025	genus Lachnospiraceae UCG001 id.11321	rs4981345	T	C	T	C	-0.0681973	0.000184993	NA	0.339529	FALSE	FALSE	FALSE	0.00122494	0.88	TRUE	14	21455973	0.0149831	6.08597e-06	20.7172
juvenile absence epilepsy || id:ieu-b-12	ebi-a-GCST90017025	genus Lachnospiraceae UCG001 id.11321	rs573933	T	C	T	C	-0.107898	-0.00131041	NA	0.0895887	FALSE	FALSE	FALSE	0.00203045	0.52	TRUE	9	14477851	0.0232346	3.10506e-06	21.5653
juvenile absence epilepsy || id:ieu-b-12	ebi-a-GCST90017025	genus Lachnospiraceae UCG001 id.11321	rs62496417	T	G	T	G	-0.0748504	-0.000313595	NA	0.238903	FALSE	FALSE	FALSE	0.00136047	0.82	TRUE	7	96965504	0.0165681	5.87503e-06	20.41
juvenile absence epilepsy || id:ieu-b-12	ebi-a-GCST90017025	genus Lachnospiraceae UCG001 id.11321	rs7341608	T	C	T	C	-0.0784757	-0.00255073	NA	0.19488	FALSE	FALSE	FALSE	0.00145302	0.0790005	TRUE	8	56839500	0.0177648	9.48135e-06	19.5142
juvenile absence epilepsy || id:ieu-b-12	ebi-a-GCST90017025	genus Lachnospiraceae UCG001 id.11321	rs9403580	C	T	C	T	0.107801	0.0018316	NA	0.104024	FALSE	FALSE	FALSE	0.00189434	0.33	TRUE	6	145006780	0.0229777	3.46785e-06	22.0106
juvenile absence epilepsy || id:ieu-b-12	ebi-a-GCST90017025	genus Lachnospiraceae UCG001 id.11321	rs985416	T	C	T	C	-0.0970258	-0.00158694	NA	0.805733	FALSE	FALSE	FALSE	0.00146326	0.28	TRUE	3	148269083	0.0181807	1.45589e-07	28.4809
juvenile absence epilepsy || id:ieu-b-12	ebi-a-GCST90017027	genus Lachnospiraceae UCG008 id.11328	rs10741777	T	C	T	C	-0.0973842	-0.000577622	NA	0.23758	FALSE	FALSE	FALSE	0.00136704	0.67	TRUE	11	19572557	0.0194791	7.68652e-07	24.9942
juvenile absence epilepsy || id:ieu-b-12	ebi-a-GCST90017027	genus Lachnospiraceae UCG008 id.11328	rs10793103	T	C	T	C	-0.0974344	-7.92029e-05	NA	0.684005	FALSE	FALSE	FALSE	0.00126318	0.95	TRUE	11	74391775	0.0181279	9.34932e-08	28.8888
juvenile absence epilepsy || id:ieu-b-12	ebi-a-GCST90017027	genus Lachnospiraceae UCG008 id.11328	rs10801803	G	A	G	A	-0.117029	-0.000513596	NA	0.137066	FALSE	FALSE	FALSE	0.00167809	0.760001	TRUE	1	90818872	0.0243085	1.4003e-06	23.1777
juvenile absence epilepsy || id:ieu-b-12	ebi-a-GCST90017027	genus Lachnospiraceae UCG008 id.11328	rs13024781	T	C	T	C	-0.0798769	0.000565006	NA	0.463825	FALSE	FALSE	FALSE	0.00115794	0.630001	TRUE	2	168628871	0.0168846	2.29166e-06	22.38
juvenile absence epilepsy || id:ieu-b-12	ebi-a-GCST90017027	genus Lachnospiraceae UCG008 id.11328	rs57091572	A	G	A	G	-0.110443	-0.000172113	NA	0.144369	FALSE	FALSE	FALSE	0.00164526	0.92	TRUE	6	81214803	0.0235801	2.85825e-06	21.9374
juvenile absence epilepsy || id:ieu-b-12	ebi-a-GCST90017027	genus Lachnospiraceae UCG008 id.11328	rs67078837	T	C	T	C	-0.0845848	0.00111239	NA	0.467089	FALSE	FALSE	FALSE	0.00116264	0.34	TRUE	4	114220647	0.0170693	7.68192e-07	24.5558
juvenile absence epilepsy || id:ieu-b-12	ebi-a-GCST90017030	genus Lactobacillus id.1837	rs75127669	C	A	C	A	0.139784	-0.00188919	NA	0.0652434	FALSE	FALSE	FALSE	0.00241164	0.43	TRUE	6	151027636	0.0310414	6.83439e-06	20.2783
juvenile absence epilepsy || id:ieu-b-12	ebi-a-GCST90017030	genus Lactobacillus id.1837	rs768253	T	G	T	G	-0.079195	-0.000655554	NA	0.39375	FALSE	FALSE	FALSE	0.0011863	0.58	TRUE	8	69010103	0.0171791	4.24766e-06	21.2518
juvenile absence epilepsy || id:ieu-b-12	ebi-a-GCST90017030	genus Lactobacillus id.1837	rs921925	A	C	A	C	0.0985077	-0.00121356	NA	0.216906	FALSE	FALSE	FALSE	0.00141891	0.39	TRUE	19	6928017	0.0203229	9.71673e-07	23.4947
juvenile absence epilepsy || id:ieu-b-12	ebi-a-GCST90017032	genus Marvinbryantia id.2005	rs11620597	T	C	T	C	0.119479	0.0003535	NA	0.0595233	FALSE	FALSE	FALSE	0.00244388	0.88	TRUE	13	86079090	0.0271688	7.80171e-06	19.3394
juvenile absence epilepsy || id:ieu-b-12	ebi-a-GCST90017032	genus Marvinbryantia id.2005	rs2724813	G	A	G	A	0.0840769	0.000928332	NA	0.813405	FALSE	FALSE	FALSE	0.00150439	0.54	TRUE	10	12516924	0.0167551	6.28449e-07	25.1802
juvenile absence epilepsy || id:ieu-b-12	ebi-a-GCST90017032	genus Marvinbryantia id.2005	rs3125832	A	C	A	C	0.0679323	-0.000175038	NA	0.240111	FALSE	FALSE	FALSE	0.00138696	0.9	TRUE	1	211400180	0.015012	5.02736e-06	20.4774
juvenile absence epilepsy || id:ieu-b-12	ebi-a-GCST90017032	genus Marvinbryantia id.2005	rs61884471	G	A	G	A	0.124426	0.00262338	NA	0.0735054	FALSE	FALSE	FALSE	0.00221514	0.24	TRUE	11	45826561	0.0248431	1.01163e-06	25.0848
juvenile absence epilepsy || id:ieu-b-12	ebi-a-GCST90017032	genus Marvinbryantia id.2005	rs8006832	G	T	G	T	-0.0952415	0.00167581	NA	0.107907	FALSE	FALSE	FALSE	0.0018631	0.37	TRUE	14	21577837	0.0216699	6.58082e-06	19.317
juvenile absence epilepsy || id:ieu-b-12	ebi-a-GCST90017039	genus Parabacteroides id.954	rs4236095	A	G	A	G	-0.0761961	0.00341399	NA	0.862096	FALSE	FALSE	FALSE	0.001679	0.0420001	TRUE	6	47368687	0.0157042	1.93143e-06	23.5415
juvenile absence epilepsy || id:ieu-b-12	ebi-a-GCST90017039	genus Parabacteroides id.954	rs60884758	C	T	C	T	-0.0702667	0.00104232	NA	0.17164	FALSE	FALSE	FALSE	0.00156292	0.5	TRUE	9	2217340	0.0142249	5.7069e-07	24.4006
juvenile absence epilepsy || id:ieu-b-12	ebi-a-GCST90017039	genus Parabacteroides id.954	rs6657302	T	C	T	C	-0.10452	0.00365843	NA	0.0588582	FALSE	FALSE	FALSE	0.00244032	0.13	TRUE	1	85585609	0.0225521	9.75708e-06	21.4795
juvenile absence epilepsy || id:ieu-b-12	ebi-a-GCST90017039	genus Parabacteroides id.954	rs7298818	C	T	C	T	0.0888832	-0.00203818	NA	0.0815635	FALSE	FALSE	FALSE	0.00210595	0.33	TRUE	12	56396953	0.0200902	8.53631e-06	19.5736
juvenile absence epilepsy || id:ieu-b-12	ebi-a-GCST90017042	genus Peptococcus id.2037	rs10031059	C	T	C	T	0.121167	0.00205216	NA	0.765903	FALSE	FALSE	FALSE	0.00136293	0.13	TRUE	4	35358594	0.0225844	1.23637e-07	28.784
juvenile absence epilepsy || id:ieu-b-12	ebi-a-GCST90017042	genus Peptococcus id.2037	rs11001941	G	A	G	A	-0.195611	-0.00513164	NA	0.0637816	FALSE	FALSE	FALSE	0.00235722	0.0290001	TRUE	10	78716030	0.0392217	1.32859e-06	24.8733
juvenile absence epilepsy || id:ieu-b-12	ebi-a-GCST90017042	genus Peptococcus id.2037	rs12069354	C	T	C	T	0.16763	0.00165846	NA	0.0612575	FALSE	FALSE	FALSE	0.00241805	0.49	TRUE	1	216223782	0.0379501	9.28346e-06	19.5109
juvenile absence epilepsy || id:ieu-b-12	ebi-a-GCST90017042	genus Peptococcus id.2037	rs413827	G	A	G	A	0.110229	0.000243973	NA	0.204553	FALSE	FALSE	FALSE	0.00142403	0.86	TRUE	14	57985112	0.0237523	3.30088e-06	21.5368
juvenile absence epilepsy || id:ieu-b-12	ebi-a-GCST90017042	genus Peptococcus id.2037	rs6918730	A	G	A	G	-0.135311	0.000926784	NA	0.887884	FALSE	FALSE	FALSE	0.00183262	0.61	TRUE	6	99020289	0.0289742	1.14731e-06	21.8094
juvenile absence epilepsy || id:ieu-b-12	ebi-a-GCST90017042	genus Peptococcus id.2037	rs7033353	G	T	G	T	-0.090152	0.00154914	NA	0.586054	FALSE	FALSE	FALSE	0.00117363	0.19	TRUE	9	104595848	0.018995	2.21958e-06	22.5254
juvenile absence epilepsy || id:ieu-b-12	ebi-a-GCST90017042	genus Peptococcus id.2037	rs74592222	G	A	G	A	0.137957	-0.00222426	NA	0.10606	FALSE	FALSE	FALSE	0.00190555	0.24	TRUE	1	75971700	0.0302965	8.55342e-06	20.7349
juvenile absence epilepsy || id:ieu-b-12	ebi-a-GCST90017047	genus Romboutsia id.11347	rs11221428	T	C	T	C	-0.0726779	-9.64772e-05	NA	0.16948	FALSE	FALSE	FALSE	0.00154187	0.95	TRUE	11	99665050	0.0158263	6.48649e-06	21.0885
juvenile absence epilepsy || id:ieu-b-12	ebi-a-GCST90017047	genus Romboutsia id.11347	rs16843578	C	T	C	T	-0.0875276	-0.000388522	NA	0.0888087	FALSE	FALSE	FALSE	0.00202807	0.85	TRUE	1	171903885	0.0196779	5.08124e-06	19.7848
juvenile absence epilepsy || id:ieu-b-12	ebi-a-GCST90017047	genus Romboutsia id.11347	rs34302036	G	A	G	A	-0.0550261	0.00302549	NA	0.58293	FALSE	FALSE	FALSE	0.00117228	0.00990011	TRUE	7	78136725	0.0120835	5.87665e-06	20.7373
juvenile absence epilepsy || id:ieu-b-12	ebi-a-GCST90017047	genus Romboutsia id.11347	rs61841503	G	A	G	A	0.092888	-0.000720083	NA	0.157184	FALSE	FALSE	FALSE	0.00159369	0.649999	TRUE	10	17019559	0.0171454	3.99595e-08	29.3511
juvenile absence epilepsy || id:ieu-b-12	ebi-a-GCST90017047	genus Romboutsia id.11347	rs62504452	A	G	A	G	-0.0710048	0.00172758	NA	0.165762	FALSE	FALSE	FALSE	0.00155651	0.27	TRUE	7	145760298	0.0156654	4.65833e-06	20.5444
juvenile absence epilepsy || id:ieu-b-12	ebi-a-GCST90017047	genus Romboutsia id.11347	rs9389266	T	G	T	G	0.0722815	0.000177081	NA	0.152642	FALSE	FALSE	FALSE	0.00159471	0.91	TRUE	6	135411737	0.0162353	9.38469e-06	19.8214
juvenile absence epilepsy || id:ieu-b-12	ebi-a-GCST90017047	genus Romboutsia id.11347	rs9567264	C	T	C	T	0.0580018	-0.00188397	NA	0.306513	FALSE	FALSE	FALSE	0.00126752	0.14	TRUE	13	32720756	0.0127495	5.75692e-06	20.6965
juvenile absence epilepsy || id:ieu-b-12	ebi-a-GCST90017050	genus Ruminiclostridium6 id.11356	rs10829821	T	C	T	C	-0.097606	-0.000413724	NA	0.0903179	FALSE	FALSE	FALSE	0.00201407	0.84	TRUE	10	132651293	0.0216072	3.47144e-06	20.4059
juvenile absence epilepsy || id:ieu-b-12	ebi-a-GCST90017050	genus Ruminiclostridium6 id.11356	rs2548459	C	T	C	T	0.0554866	-0.00126117	NA	0.503593	FALSE	FALSE	FALSE	0.00114205	0.27	TRUE	19	49209339	0.0122755	6.40206e-06	20.4314
juvenile absence epilepsy || id:ieu-b-12	ebi-a-GCST90017050	genus Ruminiclostridium6 id.11356	rs61060922	T	G	T	G	0.15913	0.00116813	NA	0.0536638	FALSE	FALSE	FALSE	0.00255636	0.649999	TRUE	16	72136154	0.0322283	1.08648e-06	24.3798
juvenile absence epilepsy || id:ieu-b-12	ebi-a-GCST90017050	genus Ruminiclostridium6 id.11356	rs663262	C	T	C	T	0.13498	0.000499262	NA	0.947471	FALSE	FALSE	FALSE	0.00259126	0.85	TRUE	11	86179076	0.0310715	3.39414e-06	18.8718
juvenile absence epilepsy || id:ieu-b-12	ebi-a-GCST90017050	genus Ruminiclostridium6 id.11356	rs73176030	T	C	T	C	0.058665	-0.00052382	NA	0.317456	FALSE	FALSE	FALSE	0.00124785	0.67	TRUE	7	101271282	0.013208	7.28887e-06	19.728
juvenile absence epilepsy || id:ieu-b-12	ebi-a-GCST90017050	genus Ruminiclostridium6 id.11356	rs77193512	A	G	A	G	0.0736533	2.38384e-06	NA	0.194418	FALSE	FALSE	FALSE	0.00145561	1	TRUE	11	40289063	0.0153163	1.29587e-06	23.1247
juvenile absence epilepsy || id:ieu-b-12	ebi-a-GCST90017050	genus Ruminiclostridium6 id.11356	rs79968172	G	A	G	A	0.11614	0.0062402	NA	0.0602726	FALSE	FALSE	FALSE	0.0024074	0.00949992	TRUE	1	240503826	0.0243083	1.66054e-06	22.8273
juvenile absence epilepsy || id:ieu-b-12	ebi-a-GCST90017050	genus Ruminiclostridium6 id.11356	rs9555756	A	C	A	C	-0.0804138	-0.000901511	NA	0.138234	FALSE	FALSE	FALSE	0.00166832	0.59	TRUE	13	111703249	0.0176692	7.10133e-06	20.7123
juvenile absence epilepsy || id:ieu-b-12	ebi-a-GCST90017052	genus Ruminococcaceae NK4A214 group id.11358	rs12642039	C	T	C	T	0.0553003	0.00041224	NA	0.653843	FALSE	FALSE	FALSE	0.00123172	0.74	TRUE	4	159932022	0.0119397	3.43005e-06	21.452
juvenile absence epilepsy || id:ieu-b-12	ebi-a-GCST90017052	genus Ruminococcaceae NK4A214 group id.11358	rs12731	A	G	A	G	-0.0527684	0.0013814	NA	0.444338	FALSE	FALSE	FALSE	0.00115265	0.23	TRUE	2	239087912	0.0115053	4.87237e-06	21.0355
juvenile absence epilepsy || id:ieu-b-12	ebi-a-GCST90017052	genus Ruminococcaceae NK4A214 group id.11358	rs13087692	G	T	G	T	-0.0574623	0.000594227	NA	0.689534	FALSE	FALSE	FALSE	0.00124746	0.630001	TRUE	3	84725039	0.012594	8.69221e-06	20.818
juvenile absence epilepsy || id:ieu-b-12	ebi-a-GCST90017052	genus Ruminococcaceae NK4A214 group id.11358	rs6681678	T	C	T	C	0.100174	0.000179404	NA	0.945701	FALSE	FALSE	FALSE	0.00252914	0.94	TRUE	1	100248591	0.024	9.0494e-06	17.4216
juvenile absence epilepsy || id:ieu-b-12	ebi-a-GCST90017054	genus Ruminococcaceae UCG003 id.11361	rs10490280	C	T	C	T	-0.0672094	0.000303188	NA	0.230801	FALSE	FALSE	FALSE	0.00137236	0.83	TRUE	2	37905976	0.0143309	4.15547e-06	21.9944
juvenile absence epilepsy || id:ieu-b-12	ebi-a-GCST90017054	genus Ruminococcaceae UCG003 id.11361	rs11613919	G	T	G	T	0.0727604	-0.000943088	NA	0.17462	FALSE	FALSE	FALSE	0.00152832	0.54	TRUE	12	75496463	0.0155716	1.6251e-06	21.8335
juvenile absence epilepsy || id:ieu-b-12	ebi-a-GCST90017054	genus Ruminococcaceae UCG003 id.11361	rs3013089	G	A	G	A	-0.0551473	-0.00114392	NA	0.398605	FALSE	FALSE	FALSE	0.0011953	0.34	TRUE	1	13794594	0.0120346	4.38137e-06	20.9984
juvenile absence epilepsy || id:ieu-b-12	ebi-a-GCST90017054	genus Ruminococcaceae UCG003 id.11361	rs4452755	A	C	A	C	-0.0634463	0.000670337	NA	0.279855	FALSE	FALSE	FALSE	0.00128404	0.6	TRUE	8	82026852	0.0134741	3.29337e-06	22.1724
juvenile absence epilepsy || id:ieu-b-12	ebi-a-GCST90017054	genus Ruminococcaceae UCG003 id.11361	rs4532474	G	A	G	A	0.0769231	-0.00321216	NA	0.141323	FALSE	FALSE	FALSE	0.00166884	0.0539995	TRUE	6	105781538	0.017045	4.82125e-06	20.3666
juvenile absence epilepsy || id:ieu-b-12	ebi-a-GCST90017054	genus Ruminococcaceae UCG003 id.11361	rs646327	G	A	G	A	0.0586696	-0.0011379	NA	0.500905	FALSE	FALSE	FALSE	0.00114693	0.32	TRUE	19	49209851	0.0118369	7.83177e-07	24.5669
juvenile absence epilepsy || id:ieu-b-12	ebi-a-GCST90017054	genus Ruminococcaceae UCG003 id.11361	rs6759615	A	G	A	G	0.102523	0.00297246	NA	0.0785309	FALSE	FALSE	FALSE	0.00214665	0.17	TRUE	2	205238716	0.0200204	7.86231e-07	26.2239
juvenile absence epilepsy || id:ieu-b-12	ebi-a-GCST90017054	genus Ruminococcaceae UCG003 id.11361	rs73341549	T	C	T	C	-0.169857	-0.00295814	NA	0.0529982	FALSE	FALSE	FALSE	0.00258838	0.25	TRUE	7	51541468	0.0318768	1.50952e-07	28.3934
juvenile absence epilepsy || id:ieu-b-12	ebi-a-GCST90017055	genus Ruminococcaceae UCG004 id.11362	rs10976229	T	G	T	G	0.095976	0.0032781	NA	0.135339	FALSE	FALSE	FALSE	0.00168735	0.0519996	TRUE	9	7317307	0.0214554	7.04482e-06	20.0102
juvenile absence epilepsy || id:ieu-b-12	ebi-a-GCST90017055	genus Ruminococcaceae UCG004 id.11362	rs11961899	G	A	G	A	-0.0707825	-0.00222495	NA	0.289105	FALSE	FALSE	FALSE	0.0012819	0.0830004	TRUE	6	132887921	0.0161381	9.18015e-06	19.2374
juvenile absence epilepsy || id:ieu-b-12	ebi-a-GCST90017055	genus Ruminococcaceae UCG004 id.11362	rs12125734	G	T	G	T	0.133972	0.00149657	NA	0.0928196	FALSE	FALSE	FALSE	0.00198249	0.450001	TRUE	1	103732214	0.0257416	2.09426e-07	27.0868
juvenile absence epilepsy || id:ieu-b-12	ebi-a-GCST90017055	genus Ruminococcaceae UCG004 id.11362	rs2248146	T	C	T	C	0.0689452	0.00167137	NA	0.326503	FALSE	FALSE	FALSE	0.0012359	0.18	TRUE	7	24791998	0.0153649	8.19993e-06	20.1349
juvenile absence epilepsy || id:ieu-b-12	ebi-a-GCST90017055	genus Ruminococcaceae UCG004 id.11362	rs511258	G	A	G	A	-0.0757474	-0.000754887	NA	0.260729	FALSE	FALSE	FALSE	0.00134135	0.57	TRUE	3	169966722	0.0162475	4.52054e-06	21.7351
juvenile absence epilepsy || id:ieu-b-12	ebi-a-GCST90017055	genus Ruminococcaceae UCG004 id.11362	rs6769553	A	G	A	G	0.0849743	-0.00018963	NA	0.295633	FALSE	FALSE	FALSE	0.00127621	0.88	TRUE	3	54427795	0.0157451	7.91061e-08	29.1262
juvenile absence epilepsy || id:ieu-b-12	ebi-a-GCST90017056	genus Ruminococcaceae UCG005 id.11363	rs10873449	C	T	C	T	-0.0654843	0.00300358	NA	0.827277	FALSE	FALSE	FALSE	0.00153303	0.05	TRUE	14	94630731	0.0143973	4.11169e-06	20.6877
juvenile absence epilepsy || id:ieu-b-12	ebi-a-GCST90017056	genus Ruminococcaceae UCG005 id.11363	rs10950694	C	T	C	T	-0.0577628	-0.000321169	NA	0.577669	FALSE	FALSE	FALSE	0.00118114	0.79	TRUE	7	18026604	0.011412	4.29804e-07	25.6196
juvenile absence epilepsy || id:ieu-b-12	ebi-a-GCST90017056	genus Ruminococcaceae UCG005 id.11363	rs114279581	A	G	A	G	-0.146604	-0.000894415	NA	0.0577151	FALSE	FALSE	FALSE	0.00248095	0.719999	TRUE	2	198122357	0.0316034	3.21855e-06	21.5191
juvenile absence epilepsy || id:ieu-b-12	ebi-a-GCST90017056	genus Ruminococcaceae UCG005 id.11363	rs12288512	A	G	A	G	0.066635	0.00179779	NA	0.19399	FALSE	FALSE	FALSE	0.00145743	0.22	TRUE	11	27747671	0.0144356	3.10277e-06	21.3076
juvenile absence epilepsy || id:ieu-b-12	ebi-a-GCST90017056	genus Ruminococcaceae UCG005 id.11363	rs12458218	T	C	T	C	0.0677322	-0.000611248	NA	0.173122	FALSE	FALSE	FALSE	0.00152302	0.69	TRUE	18	22575871	0.0144525	2.41024e-06	21.9636
juvenile absence epilepsy || id:ieu-b-12	ebi-a-GCST90017056	genus Ruminococcaceae UCG005 id.11363	rs2893871	G	A	G	A	-0.073644	0.00152161	NA	0.150921	FALSE	FALSE	FALSE	0.00161974	0.35	TRUE	10	62662781	0.015548	3.53843e-06	22.435
juvenile absence epilepsy || id:ieu-b-12	ebi-a-GCST90017056	genus Ruminococcaceae UCG005 id.11363	rs7449320	C	A	C	A	0.0599163	0.000926148	NA	0.22118	FALSE	FALSE	FALSE	0.00140654	0.51	TRUE	5	154003091	0.0130836	4.80773e-06	20.9718
juvenile absence epilepsy || id:ieu-b-12	ebi-a-GCST90017056	genus Ruminococcaceae UCG005 id.11363	rs7586445	G	A	G	A	0.0782349	-0.000811182	NA	0.130897	FALSE	FALSE	FALSE	0.00170989	0.64	TRUE	2	239509030	0.0176458	8.81455e-06	19.6571
juvenile absence epilepsy || id:ieu-b-12	ebi-a-GCST90017057	genus Ruminococcaceae UCG009 id.11366	rs113006825	T	C	T	C	-0.0928893	0.000540923	NA	0.2036	FALSE	FALSE	FALSE	0.00145855	0.709999	TRUE	6	51803869	0.0208035	7.97701e-06	19.9369
juvenile absence epilepsy || id:ieu-b-12	ebi-a-GCST90017057	genus Ruminococcaceae UCG009 id.11366	rs2058609	G	A	G	A	-0.0816464	0.00136502	NA	0.672444	FALSE	FALSE	FALSE	0.00124529	0.27	TRUE	12	12970792	0.017472	3.12486e-06	21.8368
juvenile absence epilepsy || id:ieu-b-12	ebi-a-GCST90017057	genus Ruminococcaceae UCG009 id.11366	rs2192926	A	G	A	G	-0.089048	-0.000672377	NA	0.234845	FALSE	FALSE	FALSE	0.0013536	0.62	TRUE	2	75512668	0.0192989	4.87742e-06	21.2904
juvenile absence epilepsy || id:ieu-b-12	ebi-a-GCST90017057	genus Ruminococcaceae UCG009 id.11366	rs4079028	C	T	C	T	0.0915623	0.00206022	NA	0.212601	FALSE	FALSE	FALSE	0.00141424	0.15	TRUE	1	202299085	0.019936	3.28246e-06	21.0939
juvenile absence epilepsy || id:ieu-b-12	ebi-a-GCST90017057	genus Ruminococcaceae UCG009 id.11366	rs4708333	T	G	T	G	-0.084033	0.000401138	NA	0.310458	FALSE	FALSE	FALSE	0.00124689	0.75	TRUE	6	78106701	0.0174757	1.56246e-06	23.1223
juvenile absence epilepsy || id:ieu-b-12	ebi-a-GCST90017057	genus Ruminococcaceae UCG009 id.11366	rs6952765	G	A	G	A	0.0732099	0.000875119	NA	0.439457	FALSE	FALSE	FALSE	0.00116419	0.450001	TRUE	7	32001710	0.0166777	8.13055e-06	19.2694
juvenile absence epilepsy || id:ieu-b-12	ebi-a-GCST90017057	genus Ruminococcaceae UCG009 id.11366	rs78410648	A	G	A	G	0.120989	0.00183061	NA	0.0931455	FALSE	FALSE	FALSE	0.002	0.36	TRUE	19	52399401	0.0277317	9.67208e-06	19.0344
juvenile absence epilepsy || id:ieu-b-12	ebi-a-GCST90017058	genus Ruminococcaceae UCG010 id.11367	rs12597105	A	G	A	G	-0.0670855	0.000253853	NA	0.73196	FALSE	FALSE	FALSE	0.0013193	0.85	TRUE	16	5233941	0.0144415	4.87304e-06	21.5791
juvenile absence epilepsy || id:ieu-b-12	ebi-a-GCST90017058	genus Ruminococcaceae UCG010 id.11367	rs682403	A	G	A	G	-0.0588161	0.00254056	NA	0.495729	FALSE	FALSE	FALSE	0.00116183	0.0290001	TRUE	9	135968557	0.0124671	2.36537e-06	22.2567
juvenile absence epilepsy || id:ieu-b-12	ebi-a-GCST90017058	genus Ruminococcaceae UCG010 id.11367	rs6958419	C	T	C	T	-0.0585718	0.00165071	NA	0.473984	FALSE	FALSE	FALSE	0.00116082	0.16	TRUE	7	16349864	0.0124994	2.84165e-06	21.9583
juvenile absence epilepsy || id:ieu-b-12	ebi-a-GCST90017062	genus Ruminococcus1 id.11373	rs10167839	A	G	A	G	0.0519509	-0.000806299	NA	0.342508	FALSE	FALSE	FALSE	0.00122284	0.51	TRUE	2	181882879	0.0116306	8.09245e-06	19.9518
juvenile absence epilepsy || id:ieu-b-12	ebi-a-GCST90017062	genus Ruminococcus1 id.11373	rs11783695	G	T	G	T	-0.0734114	-0.00369038	NA	0.133433	FALSE	FALSE	FALSE	0.00171325	0.0309999	TRUE	8	144596903	0.0161398	4.72683e-06	20.6886
juvenile absence epilepsy || id:ieu-b-12	ebi-a-GCST90017062	genus Ruminococcus1 id.11373	rs7583465	C	T	C	T	0.0527654	-0.000947081	NA	0.39403	FALSE	FALSE	FALSE	0.00118262	0.42	TRUE	2	10533921	0.0112619	2.55611e-06	21.9521
juvenile absence epilepsy || id:ieu-b-12	ebi-a-GCST90017062	genus Ruminococcus1 id.11373	rs78572139	G	A	G	A	0.125038	0.0044217	NA	0.059451	FALSE	FALSE	FALSE	0.00246134	0.0719996	TRUE	5	15944587	0.0279411	5.23106e-06	20.0261
juvenile absence epilepsy || id:ieu-b-12	ebi-a-GCST90017063	genus Ruminococcus2 id.11374	rs12406309	A	C	A	C	-0.063193	-0.00118876	NA	0.202142	FALSE	FALSE	FALSE	0.00144872	0.41	TRUE	1	108074445	0.0142275	9.78949e-06	19.7279
juvenile absence epilepsy || id:ieu-b-12	ebi-a-GCST90017063	genus Ruminococcus2 id.11374	rs12986628	T	C	T	C	-0.0665937	3.90095e-05	NA	0.783623	FALSE	FALSE	FALSE	0.00141528	0.98	TRUE	2	238103439	0.0140168	2.142e-06	22.5719
juvenile absence epilepsy || id:ieu-b-12	ebi-a-GCST90017063	genus Ruminococcus2 id.11374	rs4400279	A	G	A	G	0.0546114	-0.00149294	NA	0.359509	FALSE	FALSE	FALSE	0.00120909	0.22	TRUE	7	16804578	0.0120077	5.79923e-06	20.6846
juvenile absence epilepsy || id:ieu-b-12	ebi-a-GCST90017063	genus Ruminococcus2 id.11374	rs55707116	C	A	C	A	0.0865522	0.00100604	NA	0.0946186	FALSE	FALSE	FALSE	0.0019864	0.61	TRUE	9	79919385	0.0189141	8.0059e-06	20.9404
juvenile absence epilepsy || id:ieu-b-12	ebi-a-GCST90017063	genus Ruminococcus2 id.11374	rs58681734	A	G	A	G	0.0723875	-0.00102451	NA	0.14817	FALSE	FALSE	FALSE	0.00162694	0.53	TRUE	9	137557890	0.0160787	4.18177e-06	20.2687
juvenile absence epilepsy || id:ieu-b-12	ebi-a-GCST90017063	genus Ruminococcus2 id.11374	rs61791565	T	C	T	C	-0.0523503	0.000238897	NA	0.402741	FALSE	FALSE	FALSE	0.00119042	0.84	TRUE	4	24655463	0.0117119	6.78938e-06	19.9795
juvenile absence epilepsy || id:ieu-b-12	ebi-a-GCST90017065	genus Ruminococcus gnavus group id.14376	rs12136548	C	T	C	T	0.0901946	-0.000199403	NA	0.298323	FALSE	FALSE	FALSE	0.00125771	0.87	TRUE	1	115168097	0.0196476	3.09628e-06	21.0738
juvenile absence epilepsy || id:ieu-b-12	ebi-a-GCST90017065	genus Ruminococcus gnavus group id.14376	rs12989336	G	A	G	A	-0.0846861	-0.000755979	NA	0.332338	FALSE	FALSE	FALSE	0.00122728	0.54	TRUE	2	36259341	0.0187936	7.11803e-06	20.3051
juvenile absence epilepsy || id:ieu-b-12	ebi-a-GCST90017065	genus Ruminococcus gnavus group id.14376	rs13163520	G	A	G	A	-0.127377	0.00270526	NA	0.170663	FALSE	FALSE	FALSE	0.00156234	0.0830004	TRUE	5	18662686	0.0233883	5.61009e-08	29.6609
juvenile absence epilepsy || id:ieu-b-12	ebi-a-GCST90017065	genus Ruminococcus gnavus group id.14376	rs2909242	A	C	A	C	0.0909965	0.00106088	NA	0.636088	FALSE	FALSE	FALSE	0.00122818	0.39	TRUE	8	129224680	0.018351	7.40952e-07	24.5884
juvenile absence epilepsy || id:ieu-b-12	ebi-a-GCST90017065	genus Ruminococcus gnavus group id.14376	rs3124783	G	A	G	A	0.11599	-0.0013324	NA	0.862298	FALSE	FALSE	FALSE	0.00168276	0.43	TRUE	9	135838591	0.0249099	2.6652e-06	21.6819
juvenile absence epilepsy || id:ieu-b-12	ebi-a-GCST90017065	genus Ruminococcus gnavus group id.14376	rs4388134	T	C	T	C	0.0904997	0.00073728	NA	0.769382	FALSE	FALSE	FALSE	0.00139095	0.6	TRUE	4	190110710	0.0203544	9.11633e-06	19.7687
juvenile absence epilepsy || id:ieu-b-12	ebi-a-GCST90017065	genus Ruminococcus gnavus group id.14376	rs78399089	T	C	T	C	0.144445	0.00129551	NA	0.0812804	FALSE	FALSE	FALSE	0.00213063	0.54	TRUE	3	146290310	0.0326618	6.62995e-06	19.558
juvenile absence epilepsy || id:ieu-b-12	ebi-a-GCST90017068	genus Senegalimassilia id.11160	rs10036909	C	T	C	T	0.185519	-0.00132026	NA	0.0627019	FALSE	FALSE	FALSE	0.0023978	0.58	TRUE	5	127861692	0.0400881	8.05434e-06	21.4164
juvenile absence epilepsy || id:ieu-b-12	ebi-a-GCST90017068	genus Senegalimassilia id.11160	rs11787826	C	A	C	A	0.081327	0.000308642	NA	0.447013	FALSE	FALSE	FALSE	0.00115915	0.79	TRUE	9	34332382	0.0171154	2.63463e-06	22.5785
juvenile absence epilepsy || id:ieu-b-12	ebi-a-GCST90017068	genus Senegalimassilia id.11160	rs7225245	A	G	A	G	-0.079173	-0.000133009	NA	0.524996	FALSE	FALSE	FALSE	0.00115073	0.91	TRUE	17	48379615	0.0170421	4.18013e-06	21.5828
juvenile absence epilepsy || id:ieu-b-12	ebi-a-GCST90017074	genus Turicibacter id.2162	rs12603364	T	C	T	C	0.110861	-0.000141976	NA	0.121056	FALSE	FALSE	FALSE	0.00176456	0.94	TRUE	17	43117476	0.0225598	8.66603e-07	24.1483
juvenile absence epilepsy || id:ieu-b-12	ebi-a-GCST90017074	genus Turicibacter id.2162	rs149744580	A	G	A	G	0.169883	-0.00267368	NA	0.0516366	FALSE	FALSE	FALSE	0.00265341	0.31	TRUE	2	63366962	0.0315478	7.00971e-08	28.9976
juvenile absence epilepsy || id:ieu-b-12	ebi-a-GCST90017074	genus Turicibacter id.2162	rs2834977	T	C	T	C	-0.0959995	0.0013117	NA	0.150889	FALSE	FALSE	FALSE	0.00162361	0.42	TRUE	21	36929643	0.0208261	3.95585e-06	21.2482
juvenile absence epilepsy || id:ieu-b-12	ebi-a-GCST90017074	genus Turicibacter id.2162	rs2952020	A	G	A	G	0.0759019	0.00117982	NA	0.727715	FALSE	FALSE	FALSE	0.00130756	0.37	TRUE	8	26027842	0.0165764	5.63313e-06	20.9664
juvenile absence epilepsy || id:ieu-b-12	ebi-a-GCST90017074	genus Turicibacter id.2162	rs3734633	G	A	G	A	-0.120957	-0.00179339	NA	0.0765696	FALSE	FALSE	FALSE	0.00219167	0.41	TRUE	6	126111881	0.02683	5.31912e-06	20.3245
juvenile absence epilepsy || id:ieu-b-12	ebi-a-GCST90017074	genus Turicibacter id.2162	rs55756211	T	C	T	C	-0.115115	0.000471014	NA	0.097903	FALSE	FALSE	FALSE	0.00197506	0.81	TRUE	7	130972179	0.0240708	2.8053e-06	22.8709
juvenile absence epilepsy || id:ieu-b-12	ebi-a-GCST90016961	genus Akkermansia id.4037	rs117107102	A	G	A	G	0.204406	0.000379727	NA	0.0324654	FALSE	FALSE	FALSE	0.00329567	0.91	TRUE	18	49473635	0.0431629	3.01141e-06	22.4267
juvenile absence epilepsy || id:ieu-b-12	ebi-a-GCST90016961	genus Akkermansia id.4037	rs11729256	T	C	T	C	0.0750473	-0.00187132	NA	0.244418	FALSE	FALSE	FALSE	0.00134517	0.16	TRUE	4	95027272	0.0150184	6.58385e-07	24.9702
juvenile absence epilepsy || id:ieu-b-12	ebi-a-GCST90016961	genus Akkermansia id.4037	rs12908520	G	A	G	A	0.061772	0.000241586	NA	0.441812	FALSE	FALSE	FALSE	0.00116782	0.84	TRUE	15	97570657	0.0130954	2.2648e-06	22.2508
juvenile absence epilepsy || id:ieu-b-12	ebi-a-GCST90016961	genus Akkermansia id.4037	rs4936098	G	A	G	A	-0.0649225	-0.000975015	NA	0.635363	FALSE	FALSE	FALSE	0.00122412	0.43	TRUE	11	130280667	0.0135934	1.1036e-06	22.8105
juvenile absence epilepsy || id:ieu-b-12	ebi-a-GCST90016961	genus Akkermansia id.4037	rs61779207	G	A	G	A	-0.0760539	0.00095271	NA	0.184765	FALSE	FALSE	FALSE	0.00150117	0.53	TRUE	1	41074472	0.0167769	6.32121e-06	20.5504
juvenile absence epilepsy || id:ieu-b-12	ebi-a-GCST90016961	genus Akkermansia id.4037	rs74542928	T	C	T	C	0.112623	-0.00060169	NA	0.0948378	FALSE	FALSE	FALSE	0.00197685	0.760001	TRUE	4	100544188	0.0236434	1.4802e-06	22.69
juvenile absence epilepsy || id:ieu-b-12	ebi-a-GCST90016961	genus Akkermansia id.4037	rs9349825	A	G	A	G	-0.0703407	0.000890203	NA	0.268005	FALSE	FALSE	FALSE	0.00131518	0.5	TRUE	6	56341481	0.0147133	2.59884e-06	22.8556
juvenile absence epilepsy || id:ieu-b-12	ebi-a-GCST90016961	genus Akkermansia id.4037	rs941682	G	A	G	A	-0.0632957	0.000444126	NA	0.279445	FALSE	FALSE	FALSE	0.00129542	0.73	TRUE	20	31867840	0.0143777	9.17128e-06	19.3807
juvenile absence epilepsy || id:ieu-b-12	ebi-a-GCST90016964	genus Alloprevotella id.961	rs12675596	G	T	G	T	0.145669	4.81245e-05	NA	0.244134	FALSE	FALSE	FALSE	0.00135423	0.97	TRUE	8	69994816	0.0290678	9.63718e-07	25.1137
juvenile absence epilepsy || id:ieu-b-12	ebi-a-GCST90016964	genus Alloprevotella id.961	rs2154444	G	T	G	T	-0.138234	-0.000413526	NA	0.78885	FALSE	FALSE	FALSE	0.00141078	0.77	TRUE	21	36053643	0.0308961	8.36758e-06	20.0181
juvenile absence epilepsy || id:ieu-b-12	ebi-a-GCST90016964	genus Alloprevotella id.961	rs34619204	G	A	G	A	-0.156037	-0.000522884	NA	0.187171	FALSE	FALSE	FALSE	0.00150193	0.73	TRUE	21	40993008	0.0344392	8.84199e-06	20.5281
juvenile absence epilepsy || id:ieu-b-12	ebi-a-GCST90016964	genus Alloprevotella id.961	rs4364940	A	G	A	G	0.126418	-0.000819944	NA	0.26944	FALSE	FALSE	FALSE	0.00131394	0.53	TRUE	1	234126516	0.0282207	8.58361e-06	20.067
juvenile absence epilepsy || id:ieu-b-12	ebi-a-GCST90016964	genus Alloprevotella id.961	rs4680035	G	A	G	A	0.119599	-0.00199679	NA	0.464707	FALSE	FALSE	FALSE	0.0011549	0.0840001	TRUE	3	152805600	0.0259446	4.99057e-06	21.2501
juvenile absence epilepsy || id:ieu-b-12	ebi-a-GCST90016964	genus Alloprevotella id.961	rs58212166	A	G	A	G	-0.161506	-0.000530211	NA	0.138044	FALSE	FALSE	FALSE	0.00169016	0.75	TRUE	4	189076705	0.0359102	7.93615e-06	20.2275
juvenile absence epilepsy || id:ieu-b-12	ebi-a-GCST90016968	genus Bacteroides id.918	rs11585893	A	G	A	G	-0.0740746	-0.000919509	NA	0.141946	FALSE	FALSE	FALSE	0.00168686	0.59	TRUE	1	10644351	0.0147633	1.79511e-06	25.1751
juvenile absence epilepsy || id:ieu-b-12	ebi-a-GCST90016968	genus Bacteroides id.918	rs1340391	T	C	T	C	-0.0592004	-0.00103704	NA	0.194617	FALSE	FALSE	FALSE	0.00145488	0.48	TRUE	1	102960989	0.0132244	6.73008e-06	20.04
juvenile absence epilepsy || id:ieu-b-12	ebi-a-GCST90016968	genus Bacteroides id.918	rs17619981	T	G	T	G	0.0880978	0.00184364	NA	0.0950138	FALSE	FALSE	FALSE	0.0019777	0.35	TRUE	19	24342250	0.0187002	2.68683e-06	22.1941
juvenile absence epilepsy || id:ieu-b-12	ebi-a-GCST90016968	genus Bacteroides id.918	rs6795673	C	T	C	T	0.0538565	-0.000483635	NA	0.438633	FALSE	FALSE	FALSE	0.00115967	0.68	TRUE	3	10593224	0.0105251	3.37909e-07	26.1833
juvenile absence epilepsy || id:ieu-b-12	ebi-a-GCST90016968	genus Bacteroides id.918	rs9507307	C	T	C	T	0.0604456	0.00100972	NA	0.191262	FALSE	FALSE	FALSE	0.00148837	0.5	TRUE	13	24910476	0.0129128	2.12711e-06	21.9123
juvenile absence epilepsy || id:ieu-b-12	ebi-a-GCST90016969	genus Barnesiella id.944	rs11155559	T	C	T	C	0.0956023	-0.00073887	NA	0.0830772	FALSE	FALSE	FALSE	0.00211417	0.73	TRUE	6	148601905	0.0212961	8.91908e-06	20.1529
juvenile absence epilepsy || id:ieu-b-12	ebi-a-GCST90016969	genus Barnesiella id.944	rs12909713	C	T	C	T	-0.0550716	-0.00144228	NA	0.447192	FALSE	FALSE	FALSE	0.00117049	0.22	TRUE	15	87145913	0.0120039	4.94527e-06	21.048
juvenile absence epilepsy || id:ieu-b-12	ebi-a-GCST90016969	genus Barnesiella id.944	rs199035	G	A	G	A	0.0559495	-0.000787628	NA	0.515848	FALSE	FALSE	FALSE	0.00116288	0.5	TRUE	6	23435415	0.0119716	3.00296e-06	21.8418
juvenile absence epilepsy || id:ieu-b-12	ebi-a-GCST90016969	genus Barnesiella id.944	rs72684847	T	C	T	C	-0.114369	-0.000114949	NA	0.0576108	FALSE	FALSE	FALSE	0.00250212	0.96	TRUE	4	102616869	0.0253873	6.76176e-06	20.2947
juvenile absence epilepsy || id:ieu-b-12	ebi-a-GCST90016969	genus Barnesiella id.944	rs76181748	C	T	C	T	-0.0778559	-0.000491479	NA	0.139534	FALSE	FALSE	FALSE	0.00169084	0.77	TRUE	8	105458416	0.017164	6.77657e-06	20.5753
juvenile absence epilepsy || id:ieu-b-12	ebi-a-GCST90016969	genus Barnesiella id.944	rs79795328	A	G	A	G	-0.0818645	0.000805365	NA	0.128628	FALSE	FALSE	FALSE	0.00171861	0.64	TRUE	4	114546595	0.0176441	4.23302e-06	21.5274
juvenile absence epilepsy || id:ieu-b-12	ebi-a-GCST90016973	genus Butyricicoccus id.2055	rs10084203	G	A	G	A	-0.0549699	-0.00315982	NA	0.757568	FALSE	FALSE	FALSE	0.00134318	0.0189998	TRUE	2	191304149	0.0123563	8.58638e-06	19.7912
juvenile absence epilepsy || id:ieu-b-12	ebi-a-GCST90016973	genus Butyricicoccus id.2055	rs12034718	G	A	G	A	-0.0701199	0.000926164	NA	0.849344	FALSE	FALSE	FALSE	0.00163597	0.57	TRUE	1	67379595	0.0158213	9.57679e-06	19.6426
juvenile absence epilepsy || id:ieu-b-12	ebi-a-GCST90016973	genus Butyricicoccus id.2055	rs12585793	T	C	T	C	-0.262206	0.00169956	NA	0.0426712	FALSE	FALSE	FALSE	0.00286301	0.55	TRUE	13	27018240	0.0564729	5.79189e-06	21.5578
juvenile absence epilepsy || id:ieu-b-12	ebi-a-GCST90016973	genus Butyricicoccus id.2055	rs56221232	T	C	T	C	0.0828027	-0.000511945	NA	0.112683	FALSE	FALSE	FALSE	0.00183926	0.780001	TRUE	2	153453410	0.0167401	7.61939e-07	24.4666
juvenile absence epilepsy || id:ieu-b-12	ebi-a-GCST90016973	genus Butyricicoccus id.2055	rs7322368	C	T	C	T	-0.0815733	-0.00136669	NA	0.907714	FALSE	FALSE	FALSE	0.00198875	0.49	TRUE	13	100213990	0.0183167	5.51785e-06	19.8336
juvenile absence epilepsy || id:ieu-b-12	ebi-a-GCST90016974	genus Butyricimonas id.945	rs11228830	A	G	A	G	0.135265	-0.00222345	NA	0.0660925	FALSE	FALSE	FALSE	0.00233787	0.34	TRUE	11	56664962	0.0298411	6.55164e-06	20.5467
juvenile absence epilepsy || id:ieu-b-12	ebi-a-GCST90016974	genus Butyricimonas id.945	rs113054641	G	A	G	A	-0.144881	-0.00371568	NA	0.0691854	FALSE	FALSE	FALSE	0.00228567	0.1	TRUE	21	16550389	0.0274574	1.73696e-07	27.8422
juvenile absence epilepsy || id:ieu-b-12	ebi-a-GCST90016974	genus Butyricimonas id.945	rs12458763	A	C	A	C	0.122037	-0.00253807	NA	0.0708087	FALSE	FALSE	FALSE	0.00223236	0.26	TRUE	18	34091618	0.0269587	6.36649e-06	20.492
juvenile absence epilepsy || id:ieu-b-12	ebi-a-GCST90016974	genus Butyricimonas id.945	rs1862649	G	A	G	A	0.113124	0.000700162	NA	0.0837309	FALSE	FALSE	FALSE	0.00212883	0.74	TRUE	16	22172866	0.0248176	4.76255e-06	20.7773
juvenile absence epilepsy || id:ieu-b-12	ebi-a-GCST90016974	genus Butyricimonas id.945	rs2114713	G	T	G	T	0.062721	0.000239993	NA	0.426491	FALSE	FALSE	FALSE	0.00117134	0.84	TRUE	15	80528373	0.0138998	6.87717e-06	20.3615
juvenile absence epilepsy || id:ieu-b-12	ebi-a-GCST90016974	genus Butyricimonas id.945	rs7083431	A	C	A	C	0.0703539	0.00112659	NA	0.343835	FALSE	FALSE	FALSE	0.00122556	0.36	TRUE	10	72711156	0.0144439	8.85462e-07	23.7251
juvenile absence epilepsy || id:ieu-b-12	ebi-a-GCST90016974	genus Butyricimonas id.945	rs71428626	G	T	G	T	-0.133188	-0.000529721	NA	0.0673097	FALSE	FALSE	FALSE	0.00232263	0.82	TRUE	2	83093264	0.0289905	4.80408e-06	21.1066
juvenile absence epilepsy || id:ieu-b-12	ebi-a-GCST90016974	genus Butyricimonas id.945	rs72814525	A	G	A	G	0.0664154	0.00150531	NA	0.305353	FALSE	FALSE	FALSE	0.00126329	0.23	TRUE	10	72443070	0.0149766	8.24594e-06	19.6658
juvenile absence epilepsy || id:ieu-b-12	ebi-a-GCST90016974	genus Butyricimonas id.945	rs9657374	C	T	C	T	0.0680719	-0.000202154	NA	0.306072	FALSE	FALSE	FALSE	0.00125632	0.87	TRUE	8	4834406	0.0148172	4.5036e-06	21.1059
juvenile absence epilepsy || id:ieu-b-12	ebi-a-GCST90016980	genus Clostridium sensustricto1 id.1873	rs116847295	C	T	C	T	0.110021	0.00551985	NA	0.0630058	FALSE	FALSE	FALSE	0.00239311	0.021	TRUE	12	43485015	0.0246032	4.58121e-06	19.9971
juvenile absence epilepsy || id:ieu-b-12	ebi-a-GCST90016980	genus Clostridium sensustricto1 id.1873	rs12341505	G	A	G	A	0.0810718	-0.00143863	NA	0.125383	FALSE	FALSE	FALSE	0.00175282	0.41	TRUE	9	136710881	0.0180121	4.8217e-06	20.2587
juvenile absence epilepsy || id:ieu-b-12	ebi-a-GCST90016983	genus Coprococcus1 id.11301	rs1519491	T	C	T	C	0.0499197	-0.00109747	NA	0.405089	FALSE	FALSE	FALSE	0.00117418	0.35	TRUE	2	22079770	0.0113558	8.95282e-06	19.3245
juvenile absence epilepsy || id:ieu-b-12	ebi-a-GCST90016983	genus Coprococcus1 id.11301	rs1576241	A	G	A	G	-0.0510343	0.00335379	NA	0.456419	FALSE	FALSE	FALSE	0.00115501	0.00369999	TRUE	6	72529277	0.0109535	3.32859e-06	21.7079
juvenile absence epilepsy || id:ieu-b-12	ebi-a-GCST90016983	genus Coprococcus1 id.11301	rs4277593	G	A	G	A	-0.0585649	0.00016933	NA	0.490335	FALSE	FALSE	FALSE	0.00115948	0.88	TRUE	20	4319420	0.0109914	1.1397e-07	28.3902
juvenile absence epilepsy || id:ieu-b-12	ebi-a-GCST90016983	genus Coprococcus1 id.11301	rs73167075	T	C	T	C	0.0573137	0.00255656	NA	0.236919	FALSE	FALSE	FALSE	0.00135956	0.0599998	TRUE	3	165693143	0.0127573	8.5686e-06	20.1836
juvenile absence epilepsy || id:ieu-b-12	ebi-a-GCST90016983	genus Coprococcus1 id.11301	rs74101919	T	C	T	C	-0.0718988	-0.000674754	NA	0.178427	FALSE	FALSE	FALSE	0.00151471	0.66	TRUE	1	95424321	0.0144651	1.0329e-06	24.7059
juvenile absence epilepsy || id:ieu-b-12	ebi-a-GCST90016984	genus Coprococcus2 id.11302	rs10070053	A	G	A	G	0.0594312	0.000703262	NA	0.409083	FALSE	FALSE	FALSE	0.00117507	0.55	TRUE	5	34794789	0.0135375	7.64874e-06	19.2731
juvenile absence epilepsy || id:ieu-b-12	ebi-a-GCST90016984	genus Coprococcus2 id.11302	rs35890118	A	G	A	G	-0.066536	-0.000819592	NA	0.275164	FALSE	FALSE	FALSE	0.00130528	0.53	TRUE	10	129715759	0.0147661	8.25962e-06	20.304
juvenile absence epilepsy || id:ieu-b-12	ebi-a-GCST90016984	genus Coprococcus2 id.11302	rs6677933	C	T	C	T	-0.0804405	0.00241059	NA	0.207274	FALSE	FALSE	FALSE	0.00142993	0.0920005	TRUE	1	112139008	0.0164216	1.185e-06	23.9949
juvenile absence epilepsy || id:ieu-b-12	ebi-a-GCST90016984	genus Coprococcus2 id.11302	rs9426473	A	G	A	G	0.0727361	-0.000642802	NA	0.222969	FALSE	FALSE	FALSE	0.00139143	0.64	TRUE	1	4210455	0.0161662	6.30681e-06	20.2434
juvenile absence epilepsy || id:ieu-b-12	ebi-a-GCST90016994	genus Erysipelotrichaceae UCG003 id.11384	rs75949021	T	C	T	C	-0.169667	-0.00204426	NA	0.0483193	FALSE	FALSE	FALSE	0.00270845	0.450001	TRUE	2	175403951	0.0374238	3.57511e-06	20.5541
juvenile absence epilepsy || id:ieu-b-12	ebi-a-GCST90017000	genus Eubacterium hallii group id.11338	rs10501370	C	T	C	T	-0.115589	-0.00271452	NA	0.051436	FALSE	FALSE	FALSE	0.0026126	0.3	TRUE	11	58040621	0.0252489	5.41914e-06	20.9579
juvenile absence epilepsy || id:ieu-b-12	ebi-a-GCST90017000	genus Eubacterium hallii group id.11338	rs10798999	C	T	C	T	0.0601661	0.00187254	NA	0.225914	FALSE	FALSE	FALSE	0.0013872	0.18	TRUE	1	34308917	0.0126752	2.60555e-06	22.5317
juvenile absence epilepsy || id:ieu-b-12	ebi-a-GCST90017000	genus Eubacterium hallii group id.11338	rs10808115	C	A	C	A	0.0504747	-0.00101075	NA	0.529079	FALSE	FALSE	FALSE	0.00116579	0.39	TRUE	7	100635375	0.0109922	4.42446e-06	21.0852
juvenile absence epilepsy || id:ieu-b-12	ebi-a-GCST90017000	genus Eubacterium hallii group id.11338	rs117748144	T	C	T	C	-0.126582	0.00305351	NA	0.0513805	FALSE	FALSE	FALSE	0.00263283	0.25	TRUE	11	11771637	0.028712	7.85995e-06	19.4365
juvenile absence epilepsy || id:ieu-b-12	ebi-a-GCST90017000	genus Eubacterium hallii group id.11338	rs281379	A	G	A	G	-0.0499523	-0.00104134	NA	0.496352	FALSE	FALSE	FALSE	0.00115896	0.37	TRUE	19	49214274	0.0112153	9.32803e-06	19.8376
juvenile absence epilepsy || id:ieu-b-12	ebi-a-GCST90017000	genus Eubacterium hallii group id.11338	rs74018587	C	T	C	T	0.208943	-0.0030729	NA	0.0302051	FALSE	FALSE	FALSE	0.00336669	0.36	TRUE	15	62014160	0.043822	3.70254e-06	22.7338
juvenile absence epilepsy || id:ieu-b-12	ebi-a-GCST90017000	genus Eubacterium hallii group id.11338	rs78056098	G	T	G	T	-0.0507411	-0.000746291	NA	0.363065	FALSE	FALSE	FALSE	0.00121019	0.54	TRUE	11	123789877	0.0113758	8.2882e-06	19.8955
juvenile absence epilepsy || id:ieu-b-12	ebi-a-GCST90017000	genus Eubacterium hallii group id.11338	rs949971	T	G	T	G	-0.0540164	-0.00146277	NA	0.369258	FALSE	FALSE	FALSE	0.0012011	0.22	TRUE	3	110283389	0.0116101	3.29003e-06	21.6461
juvenile absence epilepsy || id:ieu-b-12	ebi-a-GCST90017001	genus Eubacterium nodatum group id.11297	rs10263623	C	T	C	T	0.193496	0.000545094	NA	0.0971108	FALSE	FALSE	FALSE	0.00195604	0.780001	TRUE	7	64894137	0.0439023	8.90697e-06	19.4254
juvenile absence epilepsy || id:ieu-b-12	ebi-a-GCST90017001	genus Eubacterium nodatum group id.11297	rs11006576	A	G	A	G	-0.110167	0.00130738	NA	0.500757	FALSE	FALSE	FALSE	0.00115129	0.26	TRUE	10	61322015	0.024593	7.98656e-06	20.0669
juvenile absence epilepsy || id:ieu-b-12	ebi-a-GCST90017001	genus Eubacterium nodatum group id.11297	rs34297067	A	G	A	G	-0.186907	0.000422415	NA	0.147531	FALSE	FALSE	FALSE	0.00163142	0.8	TRUE	14	52185888	0.0341475	6.59781e-08	29.9594
juvenile absence epilepsy || id:ieu-b-12	ebi-a-GCST90017001	genus Eubacterium nodatum group id.11297	rs61841040	G	T	G	T	0.160621	0.000366942	NA	0.156394	FALSE	FALSE	FALSE	0.00160949	0.82	TRUE	10	9659749	0.0341609	3.56139e-06	22.1078
juvenile absence epilepsy || id:ieu-b-12	ebi-a-GCST90017001	genus Eubacterium nodatum group id.11297	rs77910827	C	T	C	T	0.201788	-0.00231373	NA	0.0931297	FALSE	FALSE	FALSE	0.00201648	0.25	TRUE	9	96597985	0.0413568	9.05378e-07	23.8066
juvenile absence epilepsy || id:ieu-b-12	ebi-a-GCST90017001	genus Eubacterium nodatum group id.11297	rs7827125	C	T	C	T	0.1223	-0.000932886	NA	0.27863	FALSE	FALSE	FALSE	0.0013135	0.48	TRUE	8	4954912	0.0271331	7.17348e-06	20.3167
juvenile absence epilepsy || id:ieu-b-12	ebi-a-GCST90017001	genus Eubacterium nodatum group id.11297	rs7880204	T	C	T	C	-0.125454	0.00143803	NA	0.265626	FALSE	FALSE	FALSE	0.00132276	0.28	TRUE	1	171060821	0.0275303	6.8388e-06	20.7657
juvenile absence epilepsy || id:ieu-b-12	ebi-a-GCST90017001	genus Eubacterium nodatum group id.11297	rs9425984	T	C	T	C	-0.130234	0.00274008	NA	0.235342	FALSE	FALSE	FALSE	0.00136193	0.0439997	TRUE	1	34529736	0.0292347	7.20676e-06	19.845
juvenile absence epilepsy || id:ieu-b-12	ebi-a-GCST90017002	genus Eubacterium oxidoreducens group id.11339	rs12129908	A	C	A	C	-0.0893273	-0.00127253	NA	0.582471	FALSE	FALSE	FALSE	0.00117627	0.28	TRUE	1	195064019	0.0198333	5.79522e-06	20.2852
[truncated: 4,635 more rows]

## Sheet: Supplementary Table S3
Supplementary Table S3 Included instrumental variables for significant cytokines
[truncated: 959 more rows]

[truncated: 9 more sheets: Supplementary Table S4, Supplementary Table S5, Supplementary Table S6, Supplementary Table S7, Supplementary Table S8, Supplementary Table S9, Supplementary Table S10, Supplementary Table S11, Supplementary Table S12]
